# Supplementary material for: Parallel global profiling of plant TOR dynamics reveals a conserved role for LARP1 in translation
Source: eLife. 2020 Oct 15;9:e58795. doi: 10.7554/eLife.58795 (PMC7584452; doi:10.7554/eLife.58795)
Supplement: Figure 5—source data 1. — (A) Several mRNAs are translationally regulated by TOR-LARP1-5′TOP signaling in both humans (Philippe et al., 2020) and Arabidopsis. (B) Some 5′TOP mRNAs in Arabidopsis encode proteins that evolved in the plant lineage, including genes involved in chloroplast physiology and developmental patterning. (C) Although the translation of only a few RP transcripts is directly controlled by TOR-LARP1-5′TOP signaling in Arabidopsis seedlings, multiple other steps of ribosome biogenesis are subject to TOR-LARP1-5′TOP regulation. [file elife-58795-fig5-data1.xlsx]

## Sheet: Sheet1
	Gene symbol	Gene function	TOPscore	WT ΔTE (T2 / mock)	larp1 ΔTE (T2 / mock)
Conserved eukaryotic 5′TOP mRNAs	eS10a	Cytosolic ribosome	2.46	-0.67	0.04
	eS1b	Cytosolic ribosome	2.64	-0.88	-0.12
	CycD2;1	D-type cyclin	2.77	-1.44	0.17
	CycD3;2	D-type cyclin	8.27	-1.06	-0.19
	TCTP1	Growth	3.17	-2.19	-0.64
	IMB1	Nuclear import	3.02	-0.76	0.23
	UBA2C/hnRNPA	Splicing	6.04	-1.03	0.74
	eEF1Bβ1	Translation	4.34	-1.02	-0.34
	eEF1Bγ2	Translation	2.95	-0.56	0.1
	PABP8	Translation	3.4	-1.05	0.06
	ERGIC3L	Vesicle trafficking	4.17	-0.89	0.04
Plant-specific 5′TOP mRNAs	UUAT3	Cell wall composition	3.55	-1.1	0.13
	GATL6	Cell wall composition	7.61	-0.73	-0.03
	BLISTER	Chromatin structure	2.4	-0.81	0.15
	OCTOPUS-LIKE 4	Development	3.25	-0.7	0.39
	GID1A	Hormone signaling (GA)	2.66	-0.67	0.19
	BIG GRAIN1	Hormone signaling (auxin)	2.85	-0.75	-0.02
	PIN2	Hormone signaling (auxin)	4.36	-0.59	0.01
	IAA26	Hormone signaling (auxin)	5.52	-0.93	0.33
	NFU3	Plastid Fe-S cluster assembly	2.57	-1.34	0.48
	PEAPOD2	Transcription factor (TIFY)	7.05	-1.16	0.41
Ribosome biogenesis (RiBi)-related 5′TOP mRNAs	uL3m	Mitochondrial ribosome	3.57	-0.82	-0.09
	uS10m	Mitochondrial ribosome	2.58	-0.73	0.32
	bS16m	Mitochondrial ribosome	3.24	-0.95	0.02
	eS1b	Cytosolic ribosome	2.64	-0.88	-0.12
	eS10a	Cytosolic ribosome	2.46	-0.67	0.04
	EBP2	Ribosome biogenesis	4.56	-0.67	0.07
	EFG1l	Ribosome biogenesis	3.24	-0.63	0.27
	NAP57	Ribosome biogenesis	3.13	-1.02	0.4
	NUG2	Ribosome biogenesis	7.16	-0.66	0.11
	RH46	Ribosome biogenesis	3.54	-0.62	0.64
	RRN3	Ribosome biogenesis	3.79	-1.19	-0.34
	RRP1L	Ribosome biogenesis	4.24	-0.8	-0.21
	SWA1	Ribosome biogenesis	4.17	-0.59	0.28
	WDSOF1L	Ribosome biogenesis	2.82	-0.61	0.03
