# Supplementary material for: Parallel global profiling of plant TOR dynamics reveals a conserved role for LARP1 in translation
Source: eLife. 2020 Oct 15;9:e58795. doi: 10.7554/eLife.58795 (PMC7584452; doi:10.7554/eLife.58795)
Supplement: Supplementary file 1. — Table presents all global profiling data from this study, including RNA-Seq, Ribo-Seq, proteomes, and phosphoproteomes of WT and larp1 seedlings treated with glucose (mock) or glucose and Torin2. [file elife-58795-supp1.xlsx]

## Sheet: All Data
Annotations (Araport 11)										Functional Classification	RNA-Seq								Transcriptomes		Global Proteome										Phosphoproteome								Relative Translation Efficiency (Ribo-Seq/RNA-Seq)
Locus Identifier	Gene Model Description	Gene Model Type	Primary Gene Symbol	All Gene Symbols	Gene Symbol	Cytosolic ribosomal protein name	Mitochondrial ribosomal protein name (Waltz et al. 2019)	Plastidial ribosomal protein name	TOPscore (calculated from Morton et al. 2014)	MapMan Bin Name (Araport 11)	T2 x WT / ctrl x WT (significant)	T2 x WT / ctrl x WT, q-value	ctrl x larp1 / ctrl x WT (significant)	ctrl x larp1 / ctrl x WT, q-value	T2 x larp1 / T2 x WT (significant)	T2 x larp1 / T2 x WT, q-value	T2 x larp1 / ctrl x larp1 (significant)	T2 x larp1 / ctrl x larp1, q-value	Xiong et al. 2013 (glucose-TOR)	Dong et al. 2015 (24h AZD-8055 treatment)	T2 x WT / ctrl x WT	T2 x WT / ctrl x WT (p-value)	ctrl x larp1 / ctrl x WT	ctrl x larp1 / ctrl x WT (p-value)	T2 x larp1 / T2 x WT	T2 x larp1 / T2 x WT (p-value)	T2 x larp1 / ctrl x larp1	T2 x larp1 / ctrl x larp1 (p-value)	ATM or ATR-dependent UP phosphosites	ATM or ATR-dependent DOWN phosphosites	T2 x WT / ctrl x WT	T2 x WT / ctrl x WT (p-value)	ctrl x larp1 / ctrl x WT	ctrl x larp1 / ctrl x WT (p-value)	T2 x larp1 / T2 x WT	T2 x larp1 / T2 x WT (p-value)	T2 x larp1 / ctrl x larp1	T2 x larp1 / ctrl x larp1 (p-value)	T2 x WT / ctrl x WT (2-fold cutoff)	T2 x WT / ctrl x WT	ctrl x larp1 / ctrl x WT (2-fold cutoff)	ctrl x larp1 / ctrl x WT	T2 x larp1 / T2 x WT (2-fold cutoff)	T2 x larp1 / T2 x WT	T2 x larp1 / ctrl x larp1 (2-fold cutoff)	T2 x larp1 / ctrl x larp1
AT1G77300	Encodes a protein with histone lysine N-methyltransferase activity required specifically for the trimethylation of H3-K4 in FLC chromatin (and not in H3-K36 dimethylation). Acts as an inhibitor of flowering specifically involved in the autonomous promotion pathway. EFS also regulates the expression of genes involved in carotenoid biosynthesis.Modification of histone methylation at the CRTISO locu…	protein_coding	EARLY FLOWERING IN SHORT DAYS (EFS)	EARLY FLOWERING IN SHORT DAYS (EFS);SET DOMAIN GROUP 8 (SDG8);LAZARUS 2 (LAZ2);ASH1 HOMOLOG 2 (ASHH2);CAROTENOID CHLOROPLAST REGULATORY1 (CCR1)	EFS					Chromatin organisation.histone modifications.histone lysine methylation/demethylation.class II/ASH1 histone methyltransferase component		0.168778		0.132058		0.35431		0.238584											yes	yes										0	-1.20163	-1.20163		-0.314109		0.887525
AT3G19080	SWIB complex BAF60b domain-containing protein	protein_coding							2.73043	not assigned.not annotated		0.757668		0.374504		0.702664	-1.10347	0.0116911											yes	yes																0.260528
AT1G56220	Dormancy/auxin associated family protein	protein_coding							1.04064	not assigned.annotated		0.411936	-1.13587	2.78604e-08	-0.800258	0.000315408		0.768608	1.80739											yes										0.444302		0.363883		-0.0218926		0.0585261
AT5G19980	Encodes a Golgi-localized nucleotide-sugar transporter.	protein_coding	GOLGI NUCLEOTIDE SUGAR TRANSPORTER 4 (GONST4)	DP-FUCOSE TRANSPORTER 1 (GFT1);GOLGI NUCLEOTIDE SUGAR TRANSPORTER 4 (GONST4)	GONST4					Solute transport.carrier-mediated transport.DMT superfamily.NST-TPT group.GONST1/2/3/4 nucleotide sugar transporter	-1.01844	0.0168242		0.990674		0.778948	-0.815435	0.016459												yes												0.281771				0.385654
AT1G09780	Encodes a 2,3-biphosphoglycerate-independent phosphoglycerate mutase that is involved in pollen development and stomatal movement.	protein_coding	2,3-BIPHOSPHOGLYCERATE-INDEPENDENT PHOSPHOGLYCERATE MUTASE 1 (iPGAM1)	2,3-BIPHOSPHOGLYCERATE-INDEPENDENT PHOSPHOGLYCERATE MUTASE 1 (iPGAM1)	iPGAM1					Enzyme classification.EC_5 isomerases.EC_5.4 intramolecular transferase	-0.587657	0.00211771	0.761284	1.40626e-05	0.488991	0.0172024	-0.859951	1.19743e-07	-1.5016		-0.03	0.76	0.23	0.1	0.24	0.0061	-0.02	0.37		yes										-0.543622		-0.782409		-0.0947405		0.144046
AT5G15020	Encodes a homolog of the transcriptional repressor SIN3 (AT1G24190).	protein_coding	SIN3-LIKE 2 (SNL2)	SIN3-LIKE 2 (SNL2)	SNL2					Chromatin organisation.histone modifications.histone deacetylation.histone deacetylase machineries.SNL-type component	0.487869	0.00268691		0.0959594		0.956148		0.193179												yes										0.0300572	-1.11042	-1.11042		-0.429988		0.710493
AT1G10340	Ankyrin repeat family protein	protein_coding								not assigned.annotated	1.3346	0.0167981		0.342389		0.511504	1.52708	0.00216269	3.75644	2.16891										yes
AT4G24690	Encodes NBR1, a selective autophagy substrate. The mRNA is cell-to-cell mobile.	protein_coding	NEXT TO BRCA1 GENE 1 (NBR1)	ARABIDOPSIS THALIANA NEXT TO BRCA1 GENE 1 (AtNBR1);NEXT TO BRCA1 GENE 1 (NBR1)	NBR1				1.30224	Vesicle trafficking.autophagosome formation.cargo recruitment.NBR1 autophagic adapter protein	0.519077	0.00319839		0.0518486		0.925614		0.352069		0.0984073										yes										0.15451		-0.636037		-0.251807		0.538739
AT3G58620	Encodes one of the 36 carboxylate clamp (CC)-tetratricopeptide repeat (TPR) proteins (Prasad 2010, Pubmed ID: 20856808) with potential to interact with Hsp90/Hsp70 as co-chaperones. The TTL family is required for osmotic stress tolerance and male sporogenesis.	protein_coding	TETRATRICOPETIDE-REPEAT THIOREDOXIN-LIKE 4 (TTL4)	TETRATRICOPETIDE-REPEAT THIOREDOXIN-LIKE 4 (TTL4)	TTL4				3.74811	not assigned.annotated	0.521082	0.041749		0.96772		0.0567648		0.951885												yes										-0.140863		-0.821403		-0.0824622		0.598078
AT1G76700	DNAJ heat shock N-terminal domain-containing protein	protein_coding							1.04222	not assigned.annotated	0.84301	0.00821384		0.666942		0.845455	1.1422	1.07068e-05		1.1594										yes										0.200819		-0.807355		-0.591089		0.417085
AT5G14240	Thioredoxin superfamily protein	protein_coding								not assigned.not annotated		0.581537		0.808037		0.292219		0.414202			0.1	0.44	0.14	0.19	0.1	0.32	0.06	0.45		yes										0.174029		-0.0662337		-0.684645		-0.444381
AT2G26300	Encodes an alpha subunit of a heterotrimeric GTP-binding protein. The active GTP-bound form of GPA1 binds to the GTG1 and GTG2 abscisic acid (ABA) receptors and appears to affect their GTPase and GTP-binding activity, and hence, ABA binding abilities. GPA1 is a positive regulator in ABA-mediated inhibition of stomatal opening. Plants with recessive mutant alleles have complex phenotypes including…	protein_coding	G PROTEIN ALPHA SUBUNIT 1 (GP ALPHA 1)	G PROTEIN ALPHA SUBUNIT 1 (GPA1);G PROTEIN ALPHA SUBUNIT 1 (GP ALPHA 1);ARABIDOPSIS THALIANA G PROTEIN ALPHA SUBUNIT 1 (ATGPA1)	GP ALPHA 1					not assigned.annotated		0.695589		0.744727		0.0927445	0.671946	0.000452981												yes										0.0655883		0.527932		0.0931094		-0.369234
AT4G08310	DNA ligase	protein_coding								not assigned.not annotated		0.285562		0.423204		0.751267		0.42513												yes										-0.499846		-0.841634		-0.400087		-0.0582986
AT4G23630	VIRB2-interacting protein 1	protein_coding	VIRB2-INTERACTING PROTEIN 1 (BTI1)	VIRB2-INTERACTING PROTEIN 1 (BTI1);RETICULON 1 (RTN1);RETICULAN LIKE PROTEIN B1 (RTNLB1)	BTI1					not assigned.annotated		0.496418		0.183276	0.541848	0.0235476		0.995238			0.23	0.025	0.17	0.017	-0.23	0.044	-0.17	0.038		yes										0.153474		-0.292782		-0.419456		0.0268001
AT1G11860	Glycine cleavage T-protein family	protein_coding								Photosynthesis.photorespiration.glycine cleavage system.T-protein aminomethyltransferase component		0.32054		0.107595	-0.407685	0.0227372		0.670866		-1.19245	-0.24	0.0014	-0.27	0	-0.11	0.12	-0.08	0.2		yes										0.0225426		-0.529253		-0.381871		0.169925
AT5G46400	Tetratricopeptide repeat (TPR)-like superfamily protein	protein_coding	(PRP39-2)	(PRP39-2); (AT PRP39-2)	PRP39-2					not assigned.not annotated		0.928105		0.344282		0.209616		0.881274												yes																0.584963
AT5G45050	Encodes a member of the WRKY Transcription Factor (Group II-e) family.	protein_coding	(WRKY16)	TOLERANT TO TOBACCO RINGSPOT NEPOVIRUS 1 (TTR1); (ATWRKY16); (WRKY16)	WRKY16					RNA biosynthesis.transcriptional activation.WRKY transcription factor		0.608471		0.795598		0.166937		0.708056												yes										0.314873		-0.499571		-0.212994		0.601451
AT1G67120	Represents a homolog of the yeast MDN gene, which encodes a non-ribosomal protein involved in the maturation and assembly of the 60S ribosomal subunit. In Arabidopsis, it is essential for female gametogenesis progression.	protein_coding	MIDASIN 1 (MDN1)	(ATMDN1);MIDASIN 1 (MDN1)	MDN1					Protein biosynthesis.cytosolic ribosome.large subunit (LSU).LSU processome component.REA1 assembly factor (MDN1)		0.564761	1.04252	0.00160885		0.86122	-1.20593	7.68118e-05	-1.53447		0.27	0.23	0.13	0.59	0.39	0.069	0.53	0.034		yes										-0.311944	-1.64636	-1.64636		-0.382248		0.952171
AT1G51800	The gene encodes a putative member of the LRR-RLK protein family. Expressin and mutant analysis revealed that it contributes to the interaction between Arabidopsis and Hyaloperonospora arabidopsidis. and The mRNA is cell-to-cell mobile.	protein_coding	IMPAIRED OOMYCETE SUSCEPTIBILITY 1 (IOS1)	IMPAIRED OOMYCETE SUSCEPTIBILITY 1 (IOS1)	IOS1				0.615593	Enzyme classification.EC_2 transferases.EC_2.7 transferase transferring phosphorus-containing group		0.997903		0.418207		0.625163		0.841154		2.14099										yes										0.325986		-0.33383		-0.668379		-0.00856201
AT3G48860	coiled-coil protein	protein_coding	STOMATAL CYTOKINESIS DEFECTIVE 2 (SCD2)	STOMATAL CYTOKINESIS DEFECTIVE 2 (SCD2)	SCD2				1.78376	Vesicle trafficking.endomembrane trafficking.post-Golgi trafficking.SCD complex.SCD2 protein		0.876212		0.718139		0.865723		0.964555												yes										0.133267		-0.539159		-0.387023		0.285402
AT4G12070	hypothetical protein	protein_coding							2.10425	not assigned.not annotated		0.943985		0.850393		0.943174		0.988225												yes																0.724687
AT5G05600	Encodes a protein with similarity to flavonol synthases that is involved in the detoxifcation polycyclic aromatic hydrocarbons.One of 4 paralogs encoding a 2-oxoglutarate/Fe(II)-dependent oxygenases that hydroxylates JA to 12-OH-JA.	protein_coding	JASMONIC ACID OXIDASE 2 (JOX2)	JASMONATE-INDUCED OXYGENASE2 (JAO2);JASMONIC ACID OXIDASE 2 (JOX2)	JOX2				2.85469	Enzyme classification.EC_1 oxidoreductases.EC_1.14 oxidoreductase acting on paired donor with incorporation or reduction of molecular oxygen		0.104394		0.312365		0.817882	1.29051	0.00283179	1.38222	2.52353										yes														-0.257798
AT1G76870	transcription factor	protein_coding							7.10997	not assigned.not annotated		NA		NA		NA		0.826311												yes
AT3G48890	putative progesterone-binding protein homolog (Atmp2) mRNA, The mRNA is cell-to-cell mobile.	protein_coding	MEMBRANE-ASSOCIATED PROGESTERONE BINDING PROTEIN 3 (MAPR3)	MEMBRANE STEROID BINDING PROTEIN 2 (MSBP2);ARABIDOPSIS THALIANA MEMBRANE-ASSOCIATED PROGESTERONE BINDING PROTEIN 3 (AtMAPR3);MEMBRANE-ASSOCIATED PROGESTERONE BINDING PROTEIN 3 (MAPR3); (ATMP2)	MAPR3				3.36694	Phytohormones.brassinosteroid.perception and signal transduction.receptor complex.receptor kinase regulator protein (MSBP)		0.246201		0.0503159	0.493482	0.0347554		0.0757644			0.28	0.08	0.35	0.24	0.03	0.27	-0.04	0.65		one shared phosphosite: T225 in atm/atr data	-0.12	0.063	-0.59	0.66	-0.06	0.48	0.4	0.3		-0.309991		-0.62922		-0.509949		-0.19072
AT1G17210	IAP-like protein 1	protein_coding	IAP-LIKE PROTEIN 1 (ILP1)	IAP-LIKE PROTEIN 1 (ILP1);ARABIDOPSIS IAP-LIKE PROTEIN (ATILP1)	ILP1					not assigned.not annotated		0.192603		0.273236		0.538539		0.630864			-0.1	0.69	-0.05	0.6	0.4	0.065	0.35	0.037	one shared phosphosite (but there are many others): S762 in atm/atr	yes, but not same phosphosite	-1.02	0.16	-0.6	0.53	0.15	0.91	-0.27	0.33		0.206451		-0.452512		-0.311944		0.347019
AT2G29210	splicing factor PWI domain-containing protein	protein_coding								RNA processing.RNA quality control Exon Junction complex (EJC).peripheral components.SRm160 component		0.990821		0.970979		0.146432		0.0803339											yes, but not same phosphosite	yes, but not same phosphosite	-1.24	0.0032	-1.01	0.0016	0.64	0.002	0.41	0.00052		0.442943		-0.508147		0.103951	1.05504	1.05504
AT5G01400	Encodes a Symplekin/Pta1 homologue which would have the potential to interact with either ESP1 or AtCstF64.	protein_coding	ENHANCED SILENCING PHENOTYPE 4 (ESP4)	ENHANCED SILENCING PHENOTYPE 4 (ESP4)	ESP4				0.816007	RNA processing.RNA 3'-end polyadenylation.Cleavage and Polyadenylation Specificity Factor (CPSF) complex.Symplekin/Pta1 component	-0.568382	0.00823772		0.23759		0.450903	-0.613655	0.000185804											yes, but not same phosphosite	yes, but not same phosphosite	-0.49	0.91	0.3	0.67	0.81	0.46	0.02	0.91		-0.116814		-0.447459		-0.225292		0.105353
AT1G31870	pre-mRNA-splicing factor of RES complex protein	protein_coding	BUD SITESELECTION PROTEIN 13 (BUD13)	BUD SITESELECTION PROTEIN 13 (BUD13)	BUD13					RNA processing.RNA splicing.spliceosome-associated non-snRNP MOS4-associated complex (MAC).associated components.Bud13 component		0.437653		0.248539		0.977174		0.801717											yes, but not same phosphosite	yes, but not same phosphosite	0.88	0.23	0.8	0.21	0.11	0.26	0.19	0.88		-0.16665		-0.974005		-0.415037		0.392317
AT3G43590	zinc knuckle (CCHC-type) family protein	protein_coding								not assigned.not annotated	-0.700998	0.0346576		0.328388		0.116678		0.0725008												yes, but not same phosphosite	-3.89	0.2	-3.43	0.47	0.6	0.14	0.14	0.92		0.415037		-0.0544478		-0.66213		-0.192645
AT5G12350	Regulator of chromosome condensation (RCC1) family with FYVE zinc finger domain-containing protein	protein_coding							3.88365	not assigned.annotated		0.0531147	0.389886	0.0491215		0.720885		0.700852												yes, but not same phosphosite	-0.68	0.42	-0.41	0.1	0.34	1	0.07	0.6		0.500429		-0.602665		-0.398549		0.704544
AT4G27430	Positive regulator of light-regulated genes. Novel nuclear protein which requires light for its high level expression. The mRNA is cell-to-cell mobile.	protein_coding	COP1-INTERACTING PROTEIN 7 (CIP7)	COP1-INTERACTING PROTEIN 7 (CIP7)	CIP7				3.82003	not assigned.annotated	0.495583	0.00230301		0.920215		0.121358		0.201414			0.06	0.64	0.17	0.048	0.04	0.37	-0.06	0.8		yes, but not same phosphosite	-0.38	0.68	-0.54	0.25	0.01	0.38	0.18	0.97		-0.0426443		-0.95858		-0.463947		0.451989
AT4G29440	Regulator of Vps4 activity in the MVB pathway protein	protein_coding	IST1-LIKE 4 (ISTL4)	IST1-LIKE 4 (ISTL4)	ISTL4				1.0669	not assigned.not annotated		0.977364		0.653489		0.252059		0.444944												yes, but not same phosphosite	0.3	0.89	1.15	0.19	-0.57	0.7	-1.42	0.11				-0.433416				0.39173
AT5G14520	Encodes a nucleolar protein that plays an essential role in cell growth and survival through its regulation of ribosome biogenesis and mitotic progression.	protein_coding	PESCADILLO (PES)	PESCADILLO (PES)	PES					Protein biosynthesis.cytosolic ribosome.large subunit (LSU).LSU processome component.PES-BOP1-WDR12 (PeBoW) complex.PES component	-1.38877	1.03552e-07	0.69239	0.00983166	0.748291	0.0142015	-1.33287	4.95424e-09			-0.14	0.69	0.41	0.17	0.35	0.013	-0.19	0.099	yes											-0.623695		-0.778973		-0.196857		-0.0415791
AT1G75240	Encodes a zinc finger-homeodomain transcription factor ZHD5. Nuclear import and DNA binding of the ZHD5 transcription factor is modulated by a competitive peptide inhibitor MIF1 (AT1G74660).	protein_coding	HOMEOBOX PROTEIN 33 (HB33)	HOMEOBOX PROTEIN 33 (AtHB33);ZINC-FINGER HOMEODOMAIN 5 (ZHD5);HOMEOBOX PROTEIN 33 (HB33)	HB33					RNA biosynthesis.transcriptional activation.HB (Homeobox) superfamily.zf-HD transcription factor	-0.869861	0.0124132		0.37678		0.999584		0.105179											yes											0		0.16273		0.103836		-0.0588937
AT5G38430	Encodes a member of the Rubisco small subunit (RBCS) multigene family: RBCS1A (At1g67090), RBCS1B (At5g38430), RBCS2B (At5g38420), and RBCS3B (At5g38410).	protein_coding	RUBISCO SMALL SUBUNIT 1B (RBCS1B)	RUBISCO SMALL SUBUNIT 1B (RBCS1B)	RBCS1B					Photosynthesis.calvin cycle.ribulose-1,5-bisphosphat carboxylase/oxygenase (RuBisCo) activity.RuBisCo dimer.small subunit	-0.73813	0.0111158	-0.681311	0.0225342	-0.79502	0.00783831	-0.851839	0.00171674		-2.13455	-0.09	0.15	-0.49	0	-0.28	0.0038	0.12	0.15	yes
AT4G37260	Member of the R2R3 factor gene family. The mRNA is cell-to-cell mobile.	protein_coding	MYB DOMAIN PROTEIN 73 (MYB73)	(ATMYB73);MYB DOMAIN PROTEIN 73 (MYB73)	MYB73				2.18217	RNA biosynthesis.transcriptional activation.MYB superfamily.MYB transcription factor	0.509128	0.0225687	-0.473929	0.0356328		0.354059	0.733983	6.02235e-05	1.09907	2.44502									yes											0.0539388		-0.605721		-0.455301		0.204358
AT3G52660	RNA-binding (RRM/RBD/RNP motifs) family protein	protein_coding								not assigned.annotated	-0.72104	0.00652042		0.574004		0.91572	-0.482979	0.0389994											yes											0.59309		-0.0752881		-0.420451		0.247928
AT5G35910	Encodes a nuclear-localized RRP6-like protein whose mutation leads to accumulation of an rRNA maturation by-product.	protein_coding	RRP6-LIKE 2 (RRP6L2)	(AtRRP6L2);RRP6-LIKE 2 (RRP6L2)	RRP6L2					RNA processing.RNA decay.exosome complex.associated co-factors.RRP6L exoribonuclease	-0.647178	0.029062		0.382287		0.294445	-0.562429	0.0283426											yes											0.0303736		-0.826668		-0.455679		0.401363
AT3G01460	Encodes a protein with a methyl-CpG-binding domain. Has sequence similarity to human MBD proteins. Involved in the modification of the FLC chromatin acetylation state to affect FLC expression. Mutants show an early flowering, and enhanced shoot branching phenotypes.	protein_coding	METHYL-CPG-BINDING DOMAIN 9 (MBD9)	(ATMBD9);METHYL-CPG-BINDING DOMAIN 9 (MBD9)	MBD9				4.26958	not assigned.annotated		0.98139	0.420329	0.0346652		0.93211	-0.395987	0.0259979											yes											0.148863	-1.06413	-1.06413		-0.405639		0.807355
AT5G49430	WD40/YVTN repeat and Bromo-WDR9-I-like domain-containing protein	protein_coding							3.44366	not assigned.annotated		0.118816	0.451126	0.0415406		0.627336		0.333925											yes											0	-1.31194	-1.31194		-0.428458		0.883486
AT1G52980	Encodes a GTPase that belongs to the subfamily of YlqF/YawG GTPases. Functions in Pre-60S ribosomal subunit maturation. The mRNA is cell-to-cell mobile.	protein_coding	NUCLEAR/NUCLEOLAR GTPASE 2 (AtNug2)	NUCLEAR/NUCLEOLAR GTPASE 2 (Nug2);NUCLEAR/NUCLEOLAR GTPASE 2 (AtNug2)	AtNug2				7.16	Protein biosynthesis.cytosolic ribosome.large subunit (LSU).LSU processome component.NUG2 regulatory GTPase	-0.854699	0.000135915	0.504921	0.0307223		0.42403	-1.10202	1.05075e-08											yes											-0.655352		-0.729352		0.0356239		0.109624
AT2G26280	smr (Small MutS Related) domain-containing protein	protein_coding	CTC-INTERACTING DOMAIN 7 (CID7)	CTC-INTERACTING DOMAIN 7 (CID7)	CID7					not assigned.annotated	-0.39109	0.0375299		0.70273		0.989483		0.0879911											yes											0.154034		-0.564785		-0.216318		0.5025
AT3G18035	A linker histone like protein	protein_coding	(HON4)	(HON4)	HON4					not assigned.not annotated	0.412404	0.0162103		0.0999421	-0.385379	0.0260766	0.32552	0.0408831			0.04	0.82	0.15	0.73	0.11	0.5	0.01	0.87	yes											0.454566		-0.0544478		-0.132638		0.376376
AT4G38630	Regulatory particle non-ATPase subunit of the 26S proteasome with multiubiquitin-chain-binding capabilities	protein_coding	REGULATORY PARTICLE NON-ATPASE 10 (RPN10)	MULTIUBIQUITIN CHAIN BINDING PROTEIN 1 (MBP1); (ATMCB1);REGULATORY PARTICLE NON-ATPASE 10 (RPN10);MULTIUBIQUITIN-CHAIN-BINDING PROTEIN 1 (MCB1)	RPN10				1.80925	Protein degradation.26S proteasome.regulatory particle.non-ATPase subunits.RPN10 regulatory component		0.585744	0.640949	0.00276167		0.10508		0.842836			-0.03	0.93	0.15	0.015	0.16	0.016	-0.02	0.74	yes											0		-0.708951		-0.437847		0.271104
AT2G18750	Calmodulin-binding protein	protein_coding								not assigned.annotated	0.498754	0.0049432		0.211856		0.948432		0.102033											yes											-0.311944	-1	-1		-0.112027		0.576029
AT1G76890	encodes a plant trihelix DNA-binding protein	protein_coding	(GT2)	(GT2); (AT-GT2)	GT2					RNA biosynthesis.transcriptional activation.Trihelix transcription factor	0.542015	0.00140832		0.323404		0.489617	0.588392	6.87533e-05											yes											0.120294		-0.665581		-0.367732		0.418143
AT1G60640	stress response protein	protein_coding							2.49265	not assigned.not annotated	-1.95503	5.37444e-07	0.763982	0.025185	1.13137	0.0118873	-1.58765	1.52719e-08											yes												-1.13598	-1.13598				0.0972972
AT3G59670	elongation factor	protein_coding							2.52052	not assigned.not annotated	-0.882839	0.00730676		0.151699		0.212625	-0.846982	0.000638238	-2.58798										yes											0.189825		-0.642448		-0.503324		0.328949
AT2G03440	Induced at the transcriptional level by Pseudomonas syringae pv. tomato infection.	protein_coding	NODULIN-RELATED PROTEIN 1 (NRP1)	(ATNRP1);NODULIN-RELATED PROTEIN 1 (NRP1)	NRP1					not assigned.annotated		0.745416	-1.01546	4.23154e-06	-0.74027	0.00169628		0.114217			0.08	0.2	-0.39	0.013	-0.45	0.0017	0.03	0.97	yes											0.230298		0.316369		0.256615		0.170544
AT2G34040	Apoptosis inhibitory protein 5 (API5)	protein_coding								not assigned.annotated		0.11473		0.0693583		0.172338	-0.4579	0.0246147			-0.05	0.69	-0.18	0.1	-0.16	0.27	-0.03	1	yes											-0.149576		-0.618129		-0.317389		0.151164
AT4G38600	encodes a member of HECT ubiquitin protein ligase family that is involved in trichome cell morphogenesis. Mutants in this gene exhibit supernumerary trichome branches and increased DNA content.	protein_coding	KAKTUS (KAK)	UBIQUITIN-PROTEIN LIGASE 3 (UPL3);KAKTUS (KAK)	KAK					Protein degradation.peptide tagging.Ubiquitin (UBQ)-anchor addition (ubiquitylation).UBQ-ligase E3 activities.HECT E3 monomeric ligase		0.440933		0.640179		0.593619		0.755847			-0.17	0.0075	-0.11	0.21	0.08	0.068	0.03	0.94	yes											0.145198		-0.602036		-0.306661		0.440573
AT1G32490	Encodes a homolog of the yeast PRP2 protein, one of four related DEAH RNA helicases identified as essential cofactors for RNA splicing.	protein_coding	ENHANCED SILENCING PHENOTYPE 3 (ESP3)	ENHANCED SILENCING PHENOTYPE 3 (ESP3);EMBRYO DEFECTIVE 2733 (EMB2733)	ESP3					RNA processing.RNA splicing.spliceosome assembly/disassembly.RNA helicase activities.Prp2 RNA helicase		0.916351	0.627073	0.00122053		0.575152	-0.496962	0.00538226			-0.06	0.63	0.01	0.86	0.1	0.58	0.03	0.75	yes											-0.372659	-1.24207	-1.24207		-0.514573		0.354843
AT5G16270	Encodes a SCC1/REC8 ortholog that may be involved in mitosis and may represent a mitotic cohesin. Plays a role in somatic DNA double strand break damage repair. The mRNA is cell-to-cell mobile.	protein_coding	SISTER CHROMATID COHESION 1 PROTEIN 4 (SYN4)	SISTER CHROMATID COHESION 1 PROTEIN 4 (SYN4);ARABIDOPSIS HOMOLOG OF RAD21 3 (ATRAD21.3)	SYN4					Cell cycle.mitosis and meiosis.sister chromatid separation.cohesin regulator complex.SCC1 mitotic-specific Kleisin-type component		0.486857		0.105927		0.512407		0.93111			0.03	0.56	0.05	0.07	0.08	0.24	0.05	0.76	yes											0.0792267	-1.04731	-1.04731		-0.632544		0.493989
AT2G36460	Aldolase superfamily protein	protein_coding	FRUCTOSE-BISPHOSPHATE ALDOLASE 6 (FBA6)	FRUCTOSE-BISPHOSPHATE ALDOLASE 6 (FBA6)	FBA6					Carbohydrate metabolism.sucrose metabolism.synthesis.cytosolic fructose-bisphosphate aldolase		0.960066		0.330131		0.681905		0.628908			-0.07	0.35	0.1	0.66	0.16	0.082	-0.02	0.86	yes											-0.114512		-0.937634		-0.415037		0.408085
AT2G25950	PITH domain protein (DUF1000)	protein_coding								not assigned.not annotated		0.663841		0.278999		0.335122		0.560968			0	0.85	0.16	0.071	0.1	0.062	-0.05	0.79	yes											-0.199531		-0.132104		0.147509		0.0800813
AT3G49601	pre-mRNA-splicing factor	protein_coding								not assigned.not annotated		0.896481		0.900454		0.450903		0.149626			-0.1	0.33	0.17	0.32	0.26	0.03	-0.01	0.6	yes											-0.116409		-0.61891		0.192645		0.695145
AT2G22400	TRM4B is a cytosine-5--methyltransferase. Mutants have decreased methyl cytosine and defects in root development.	protein_coding	(TRM4B)	(ATTRM4B); (TRM4B)	TRM4B					RNA processing.RNA modification.rRNA/tRNA methylation.TRM4 tRNA cytidine-methyltransferase		0.248247	0.803919	0.0113432		0.330637	-0.85061	0.00321087			-0.11	0.72	0.21	0.0002	0.24	0.019	-0.08	0.091	yes											-0.937264	-1.08246	-1.08246		0.117836		0.263034
AT3G13330	Encodes a protein that interacts with the 26S proteasome. Mutants are phenotypically indistinguishable from wild type plants under a variety of growth conditions. Protein levels increase upon exposure of seedlings to MG132, a specific, potent, reversible, and cell-permeable proteasome inhibitor.	protein_coding	PROTEASOME ACTIVATING PROTEIN 200 (PA200)	PROTEASOME ACTIVATING PROTEIN 200 (PA200)	PA200					not assigned.annotated		0.60292	0.74504	0.00174165		0.383748		0.307042			-0.16	0.27	0.43	0.0018	0.57	0	-0.03	0.58	yes											-0.0995357		-0.605721		0.0435016		0.549687
AT1G70310	Spermidine synthase.	protein_coding	SPERMIDINE SYNTHASE 2 (SPDS2)	SPERMIDINE SYNTHASE 2 (SPDS2)	SPDS2				0.343671	Polyamine metabolism.spermidine/spermine.synthesis.spermidine synthase		0.847836		0.366544		0.45689		0.862017			0.03	0.86	-0.1	0.48	-0.22	0.047	-0.09	0.54	yes											0.0890835		-0.261198		-0.366896		-0.0166147
AT2G33340	Encodes MAC3B, a U-box proteins with homology to the yeast and human E3 ubiquitin ligase Prp19. Associated with the MOS4-Associated Complex (MAC). Involved in plant innate immunity.	protein_coding	MOS4-ASSOCIATED COMPLEX 3B (MAC3B)	PLANT U-BOX 60 (PUB60);MOS4-ASSOCIATED COMPLEX 3B (MAC3B)	MAC3B				2.05	RNA processing.RNA splicing.spliceosome-associated non-snRNP MOS4-associated complex (MAC).core components.MAC3 component		0.939199		0.211959	-0.425429	0.00543364		0.118553			0.09	0.4	-0.03	0.74	-0.06	0.63	0.06	0.5	yes											-0.825971		-0.089005		0.72379		-0.0131754
AT3G06110	Encodes a nuclear-localized MAP kinase phosphatase. Plants with reduced levels of MKP2 transcripts are hypersensitive to ozone and ozone-mediated activation of MPK3 and MPK6 is prolonged in these plants.	protein_coding	MAPK PHOSPHATASE 2 (MKP2)	DUAL-SPECIFICITY PROTEIN PHOSPHATASE 1B (DSPTP1B);MAPK PHOSPHATASE 2 (MKP2)	MKP2					Protein modification.dephosphorylation.tyrosine protein phosphatase (PTP) superfamily.dual-specificity phosphatase families.MAP-kinase phosphatase		0.286973		0.994246		0.978416		0.193501											yes											-0.148523		0.0310269		-0.492396		-0.671946
AT3G22480	prefoldin 2	protein_coding	PREFOLDIN 2 (PDF2)	PREFOLDIN 2 (PDF2)	PDF2					Cytoskeleton.actin and tubulin folding.Prefoldin co-chaperone complex.PFD2 component		0.270867		0.952077		0.489115		0.807241											yes											-0.566584		-0.394631		-0.205749		-0.377701
AT5G09390	CD2-binding protein-like protein	protein_coding								not assigned.not annotated		0.495261		0.982067		0.807524		0.183681											yes											-0.096508		-0.300866		-0.499102		-0.294743
AT2G29540	RNA polymerase I(A) and III(C) 14 kDa subunit	protein_coding	RNAPOLYMERASE 14 KDA SUBUNIT (RPC14)	RNAPOLYMERASE 14 KDA SUBUNIT (ATRPC14);RNAPOLYMERASE 14 KDA SUBUNIT (RPC14); (ATRPAC14)	RPC14					RNA biosynthesis.DNA-dependent RNA polymerase (Pol) complexes.regulatory subunits.subunit 11		0.279755		0.573544		0.61194		0.136738	-1.57168										yes													0.109624				-0.233431
AT2G07180	Protein kinase superfamily protein	protein_coding								Protein modification.phosphorylation.TKL kinase superfamily.RLCK-VII kinase families.RLCK-VIIa kinase		0.0699184		0.0925822		0.5646	0.748442	0.000327004	1.64032										yes											-0.113211		0.026967		-0.014797		-0.154975
AT1G48610	AT hook motif-containing protein	protein_coding							1.85416	not assigned.annotated		0.207885		0.699949		0.677423		0.0863588	-1.26248		0.06	0.43	0.13	0.59	0.15	0.62	0.08	0.42	yes											-0.391687		-0.767554		0.0960018		0.471869
AT1G51060	Encodes HTA10, a histone H2A protein. The mRNA is cell-to-cell mobile.	protein_coding	HISTONE H2A 10 (HTA10)	HISTONE H2A 10 (HTA10)	HTA10					Chromatin organisation.histones.H2A-type histone		0.524765		0.927421		0.850696		0.760441	-1.38309	-1.89816									yes											0.224354		-0.129283		-0.245112		0.108524
AT5G41810	Avr9/Cf-9 rapidly elicited protein	protein_coding								not assigned.not annotated		0.493293		0.930593		0.992851		0.304815											yes											-0.0264722		-0.412126		-0.252387		0.133267
AT1G69010	Encodes BES1-INTERACTING MYC-LIKE 2 (BIM2), a PAR1 (PHYTOCHROME RAPIDLY REGULATED 1)-interacting protein that positively modulates the shade avoidance syndrome in Arabidopsis seedlings.	protein_coding	BES1-INTERACTING MYC-LIKE PROTEIN 2 (BIM2)	BES1-INTERACTING MYC-LIKE PROTEIN 2 (BIM2)	BIM2					RNA biosynthesis.transcriptional activation.bHLH transcription factor		0.606563		0.84581		0.970008		0.664583											yes											0.18124		-0.388772		-0.435215		0.134797
AT3G18990	Required for vernalization. Essential for the complete repression of FLC in vernalized plants. Required for the methylation of histone H3	protein_coding	REDUCED VERNALIZATION RESPONSE 1 (VRN1)	REPRODUCTIVE MERISTEM 39 (REM39);REDUCED VERNALIZATION RESPONSE 1 (VRN1)	VRN1					RNA biosynthesis.transcriptional activation.B3 superfamily.REM transcription factor		0.958503		0.848564		0.370501		0.361366											yes											0.0274807		-0.274175		-0.142958		0.158698
AT1G75950	SKP1 is core component of the SCF family of E3 ubiquitin ligases and serves to tether the rest of the complex to an F-box protein, which provides specificity in binding to ubiquitin ligase substrate proteins. Predominately expressed from leptotene to pachytene. Negatively regulates recombination. Interacts with P0, a silencing suppressor protein encoded by poleroviruses by means of a conserved mi…	protein_coding	S PHASE KINASE-ASSOCIATED PROTEIN 1 (SKP1)	S PHASE KINASE-ASSOCIATED PROTEIN 1 (SKP1);ARABIDOPSIS SKP1 HOMOLOGUE 1 (ASK1); (ATSKP1); (SKP1A);UFO INTERACTING PROTEIN 1 (UIP1)	SKP1				2.58203	Protein degradation.peptide tagging.Ubiquitin (UBQ)-anchor addition (ubiquitylation).UBQ-ligase E3 activities.Cullin-based ubiquitylation complexes.SKP1-CUL1-FBX (SCF) E3 ligase complexes.SKP1/ASK1 target protein binding component		0.200387		0.129111	-0.474794	0.00043409		0.887746			0.05	0.74	0.16	0.013	0.1	0.053	-0.01	0.8	yes											0.19391		-0.0462937		0.104542		0.344746
AT3G50670	Encodes U1 snRNP 70K	protein_coding	U1 SMALL NUCLEAR RIBONUCLEOPROTEIN-70K (U1-70K)	(U1SNRNP);U1 SMALL NUCLEAR RIBONUCLEOPROTEIN-70K (U1-70K)	U1-70K				1.57641	RNA processing.RNA splicing.U2-type-intron-specific major spliceosome.U1 small nuclear ribonucleoprotein particle (snRNP).U1-70K snRNP component		0.382764		0.978715		0.222902	-0.628752	0.00375457			-0.02	0.63	0.21	0.26	0.09	0.29	-0.15	0.39	yes											-0.36995		-0.46158		0.177305		0.268935
AT1G11060	Encodes one of two redundant proteins (the other is WAPL2) that are involved in prophase removal of cohesion during meiosis. Double mutants with wapl2 exhibit reduced fertility due to defects in meiosis and also some abnormal embryo development in rare cases where embryos are formed.	protein_coding	WINGS APART-LIKE PROTEIN 1 (WAPL1)	(ATWAPL1);WINGS APART-LIKE PROTEIN 1 (WAPL1)	WAPL1					Cell cycle.mitosis and meiosis.sister chromatid separation.cohesin establishment.WAPL cohesin cofactor		0.99453		0.406911		0.697267		0.738623											yes															-0.1976		0.308753
AT2G45460	SMAD/FHA domain-containing protein	protein_coding								not assigned.not annotated		0.531579		0.754786		0.722025		0.486829											yes																	0.316672
AT1G75410	BEL1-like homeodomain 3 (BLH3)	protein_coding	BEL1-LIKE HOMEODOMAIN 3 (BLH3)	BEL1-LIKE HOMEODOMAIN 3 (BLH3)	BLH3					RNA biosynthesis.transcriptional activation.HB (Homeobox) superfamily.BEL transcription factor		0.231956	-0.703437	0.00108646		0.0720338	0.589402	0.00303											yes											0.208947		-0.244419		-0.0663425		0.387023
AT5G64170	LNK1 is a member of a small family (4 proteins) in Arabidopsis that have some overlap in function. LNK1 functions in the integration of light signaling and circadian clock. It is regulated by the clock TOC1 complex.Functions as a transcriptional coactivator.	protein_coding	NIGHT LIGHT-INDUCIBLE AND CLOCK-REGULATED 1 (LNK1)	NIGHT LIGHT-INDUCIBLE AND CLOCK-REGULATED 1 (LNK1)	LNK1					Multi-process regulation.circadian clock.evening element regulation.LNK transcriptional co-activator		0.0955904		0.473897		0.519551	0.289674	0.0473773											yes											0.296982		-0.485427		-0.338802		0.443607
AT5G25150	Encodes a putative TATA-binding-protein associated factor TAF5. TAFs are subunits of the general transcription factor IID (TFIID).	protein_coding	TBP-ASSOCIATED FACTOR 5 (TAF5)	TBP-ASSOCIATED FACTOR 5 (TAF5)	TAF5					RNA biosynthesis.RNA polymerase II-dependent transcription.SAGA transcription co-activator complex.TAF5 component		0.978841		0.960116		0.862621		0.900804											yes											0.142019		-0.572579		-0.258533		0.456065
AT4G21660	proline-rich spliceosome-associated (PSP) family protein	protein_coding							3.72172	RNA processing.RNA splicing.U2-type-intron-specific major spliceosome.U2 small nuclear ribonucleoprotein particle (snRNP).splicing factor 3B complex.SF3B2 component		0.685		0.604612		0.701329		0.0501168			0.03	0.83	0.34	0.25	0.02	0.83	-0.29	0.25	yes											-0.722993	-1.03194	-1.03194		-0.0174874		0.291463
AT1G10450	Encodes SIN3-like 6, a homolog of the transcriptional repressor SIN3 (AT1G24190).	protein_coding	SIN3-LIKE 6 (SNL6)	SIN3-LIKE 6 (SNL6)	SNL6					Chromatin organisation.histone modifications.histone deacetylation.histone deacetylase machineries.SNL-type component		0.443118	0.546567	0.0180045		0.722987	-0.659428	0.000824838											yes											-0.21901		-0.723482		0.113657		0.618129
AT3G22520	spindle assembly abnormal protein	protein_coding							0.737004	not assigned.not annotated		0.529163		0.83654		0.769902		0.299927			0.32	0.05	0.44	0.05	0.16	0.25	0.04	0.56	yes											0.0853915		-0.228269		-0.139163		0.174498
AT5G25520	SPOC domain / Transcription elongation factor S-II protein	protein_coding								not assigned.not annotated		0.671132		0.959911		0.552381		0.93212											yes											0.141356		-0.563901		-0.00965017		0.695607
AT1G55860	encodes a ubiquitin-protein ligase containing a HECT domain. There are six other HECT-domain UPLs in Arabidopsis.	protein_coding	UBIQUITIN-PROTEIN LIGASE 1 (UPL1)	UBIQUITIN-PROTEIN LIGASE 1 (UPL1)	UPL1					Protein degradation.peptide tagging.Ubiquitin (UBQ)-anchor addition (ubiquitylation).UBQ-ligase E3 activities.HECT E3 monomeric ligase		0.705268	0.3662	0.0114304		0.632275	-0.388362	0.00339765											yes											-0.149747		-0.979822		-0.129635		0.70044
AT5G53930	transcriptional regulator ATRX-like protein	protein_coding								not assigned.not annotated		0.667609		0.684194		0.828928		0.435795											yes											-0.402759	-1.07595	-1.07595		0.0480943		0.721284
AT2G04880	Encodes WRKY1, a member of the WRKY transcription factors in plants involved in disease resistance, abiotic stress, senescence as well as in some developmental processes. WRKY1 is involved in the salicylic acid signaling pathway. The crystal structure of the WRKY1 C-terminal domain revealed a zinc-binding site and identified the DNA-binding residues of WRKY1. The mRNA is cell-to-cell mobile.	protein_coding	ZINC-DEPENDENT ACTIVATOR PROTEIN-1 (ZAP1)	ZINC-DEPENDENT ACTIVATOR PROTEIN-1 (ZAP1); (WRKY1); (ATWRKY1)	ZAP1					RNA biosynthesis.transcriptional activation.WRKY transcription factor		0.072979		0.118953		0.362801		0.117341											yes											-0.0320612	-1.08153	-1.08153		-0.285909		0.76356
AT3G28030	Required for repair of pyrimidine-pyrimidinone (6-4) dimers. The mRNA is cell-to-cell mobile.	protein_coding	ULTRAVIOLET HYPERSENSITIVE 3 (UVH3)	UV REPAIR DEFECTIVE 1 (UVR1);ULTRAVIOLET HYPERSENSITIVE 3 (UVH3)	UVH3				0.763382	not assigned.annotated		0.837573		0.590815		0.388524		0.514267			0.16	0.26	0.48	0.0062	0.4	0.011	0.08	0.076	yes																	0.241008
AT2G40860	protein kinase family protein / protein phosphatase 2C ( PP2C) family protein	protein_coding								Protein modification.phosphorylation.TKL kinase superfamily.MLK kinase families.MLK-PP2C kinase		0.118249		0.594773		0.348765		0.95076											yes															0.482063	1.09873	1.09873
AT2G01730	a homolog of cleavage and polyadenylation specificity factor that plays an essential role in the development of female gametophyte and embryo	protein_coding	CLEAVAGE AND POLYADENYLATION SPECIFICITY FACTOR 73 KDA SUBUNIT-II (CPSF73-II)	EMBRYO SAC DEVELOPMENT ARREST 26 (EDA26);CLEAVAGE AND POLYADENYLATION SPECIFICITY FACTOR 73 KDA SUBUNIT-II (CPSF73-II);CLEAVAGE AND POLYADENYLATION SPECIFICITY FACTOR 73 KDA SUBUNIT-II (ATCPSF73-II)	CPSF73-II					RNA processing.RNA 3'-end polyadenylation.Cleavage and Polyadenylation Specificity Factor (CPSF) complex.CPSF73-II/FEG component		NA		NA		NA		0.914818											yes
AT2G16440	Regulates DNA replication via interaction with BICE1 and MCM7.	protein_coding	MINICHROMOSOME MAINTENANCE 4 (MCM4)	MINICHROMOSOME MAINTENANCE 4 (MCM4)	MCM4					Cell cycle.interphase.DNA replication.preinitiation.MCM replicative DNA helicase complex.MCM4 component		0.0578981	0.719768	0.0211894		0.333387	-0.992839	0.000196086	-2.49905										yes												-1.64186	-1.64186				0.910203
AT5G27670	Encodes HTA7, a histone H2A protein.	protein_coding	HISTONE H2A 7 (HTA7)	(H2A.W.7);HISTONE H2A 7 (HTA7)	HTA7				1.18212	Chromatin organisation.histones.H2A-type histone		0.104947		0.650076		0.411249		0.907562											yes											0.10806		0.25634		-0.260063		-0.408343
AT5G08130	Encodes a basic helix-loop-helix (bHLH) family protein BIM1 (BES1-INTERACTING MYC-LIKE 1), involved in brassinosteroid signaling. It synergistically interacts with BES1 to bind to E box sequences (CANNTG). Positively modulates the shade avoidance syndrome in Arabidopsis seedlings.	protein_coding	BES1-INTERACTING MYC-LIKE1 (BIM1)	BES1-INTERACTING MYC-LIKE1 (BIM1)	BIM1				1.15972	RNA biosynthesis.transcriptional activation.bHLH transcription factor		0.569905		0.399629		0.860732		0.942843											yes											-0.438884		0		0.328326		-0.110558
AT5G54260	DNA repair and meiotic recombination protein, component of MRE11 complex with RAD50 and NBS1	protein_coding	MEIOTIC RECOMBINATION 11 (MRE11)	MEIOTIC RECOMBINATION 11 (MRE11);ARABIDOPSIS MEIOTIC RECOMBINATION 11 (ATMRE11)	MRE11				2.74181	DNA damage response.DNA repair mechanisms.homologous recombination repair (HR).DNA resection MRE11-RAD50-NBS1 (MRN) complex.MRE11 component		0.772489		0.197785		0.569152		0.274117											yes																	-0.0621565
AT3G02710	Encodes a protein with a putative role in mRNA splicing.	protein_coding							0.216994	not assigned.not annotated		0.875672		0.222544		0.518692		0.88987											yes											0.16273		-0.351844		-0.52146		-0.00688639
AT5G54930	AT hook motif-containing protein	protein_coding	METABOLIC NETWORK MODULATOR 1 (MNM1)	METABOLIC NETWORK MODULATOR 1 (MNM1)	MNM1				1.34346	not assigned.not annotated		0.853353		0.193608		0.33347		0.939913											yes													-0.387926				0.138898
AT5G63460	Enhances ABA response and plant drought tolerance by modulating the stability and localization of c2-domain ABA-related proteins.LOT1 regulates plant tolerance to drought stress by affecting ABA signaling through regulating the stability and dynamic localization of CAR9 (PMID:31102784).	protein_coding	LOWER TEMPERATURE 1 (LOT1)	LOWER TEMPERATURE 1 (LOT1)	LOT1				2.47525	not assigned.not annotated		0.705711		0.903623		0.773039		0.426415											yes											0.849094		0.0862998		-0.563186		0.199609
AT3G12480	nuclear factor Y, subunit C11	protein_coding	NUCLEAR FACTOR Y, SUBUNIT C11 (NF-YC11)	NUCLEAR FACTOR Y, SUBUNIT C11 (NF-YC11)	NF-YC11				0.859217	RNA biosynthesis.RNA polymerase II-dependent transcription.pre-initiation complex.TATA box-binding protein (TBP) regulation.NC2 regulator complex.alpha component		0.582098		0.703078		0.674899		0.527888											yes											0.40632		-0.0531113		-0.257798		0.201634
AT1G48380	Encodes a novel nuclear protein required for root hair initiation and ploidy-dependent cell growth. Its sequence has similarity to the C-terminal domain of mammalian DNA topo IIalpha. Shows in vitro DNA binding activity and is likely to be part of the topo VI complex by binding to subunit A.	protein_coding	ROOT HAIRLESS 1 (RHL1)	HYPOCOTYL 7 (HYP7);ROOT HAIRLESS 1 (RHL1)	RHL1				0.149231	Cell cycle.mitosis and meiosis.meiotic recombination.meiotic double strand break initiation.meiotic topoisomerase-VI complex.accessory component (RHL1)		0.851839		0.993441		0.8162		0.947491											yes													-0.0571439				0.216133
AT1G58025	DNA-binding bromodomain-containing protein	protein_coding							0.714315	not assigned.not annotated		0.137616		0.495532	0.678305	0.0138631		0.981381											yes											0.533432		-0.341037		-0.652077		0.222392
AT1G70620	cyclin-like protein	protein_coding							0.975796	not assigned.not annotated		0.916839		0.209084	-0.88103	0.0185223		0.470935											yes											0.0374747		0.243926		0.509014		0.302563
AT4G12640	Encodes a member of the Split ends (Spen) protein family that is characterized by an N-terminal domain, with one or more RNA recognition motifs and a SPOC domain. Knockout and overexpression mutants show no apparent changes in growth, development and flowering time under standard growth conditions.	protein_coding	ARABIDOPSIS THALIANA SPLIT ENDS 2 (ATSPEN2)	ARABIDOPSIS THALIANA SPLIT ENDS 2 (ATSPEN2)	ATSPEN2				1.43896	not assigned.annotated		0.673342		0.64554		0.403305		0.899619											yes											0.334419		-0.616671		-0.536053		0.415037
AT1G17790	DNA-binding bromodomain-containing protein	protein_coding							1.85352	not assigned.annotated		0.992073		0.946057		0.717211		0.551125											yes															0.152851		0.562242
AT1G76320	FAR1-related sequence 4	protein_coding	FAR1-RELATED SEQUENCE 4 (FRS4)	CHLOROPLAST DIVISION MUTANT 25 (CPD25);FAR1-RELATED SEQUENCE 4 (FRS4)	FRS4				1.42463	RNA biosynthesis.transcriptional activation.FAR1 transcription factor		0.498571		0.695827		0.885946		0.583082											yes																	0.59561
AT3G22380	Encodes a nucleus-acting plant-specific clock regulator working close to the central oscillator and affecting the circadian gating of light responses. Circadian gating is the alteration of circadian phase according to the photoperiod of the entraining day/light cycle and the rhythmic antagonism of light responses in the early subjective night. TIC differentially regulates CCA1 and PRR9 from LHY, …	protein_coding	TIME FOR COFFEE (TIC)	TIME FOR COFFEE (TIC)	TIC				0.233275	Multi-process regulation.circadian clock.TIC circadian clock regulator		0.0884654		0.392588	-0.51041	0.000174972		0.608172											yes											0.187086		-0.437405		-0.00978102		0.61471
AT1G76710	SET domain group 26	protein_coding	ASH1-RELATED PROTEIN 1 (ASHH1)	SET DOMAIN GROUP 26 (SDG26);ASH1-RELATED PROTEIN 1 (ASHH1)	ASHH1				2.04297	Chromatin organisation.histone modifications.histone lysine methylation/demethylation.class II/ASH1 histone methyltransferase component		0.573774		0.742785		0.603792		0.738803											yes											0.0888093		-0.169925		0.393342		0.652077
AT3G52250	Encodes a protein with a putative role in mRNA splicing. The mRNA is cell-to-cell mobile.	protein_coding	POWERDRESS (PWR)	POWERDRESS (PWR)	PWR				6.54209	Chromatin organisation.histone modifications.histone deacetylation.HD1 histone deacetylase family.HDA9-PWR deacetylation complex.PWR component		0.392725		0.125292		0.60341		0.20059											yes											0		-0.932886		0.0170735		0.949959
AT4G03250	Homeodomain-like superfamily protein	protein_coding							0.375	RNA biosynthesis.transcriptional activation.HB (Homeobox) superfamily.HOX-like transcription factor		0.456032		0.668223		0.909705		0.144153											yes															-0.30227
AT3G23910	reverse transcriptase-like protein	protein_coding							2.30564	not assigned.not annotated		0.958503		0.272963		0.945929		0.199581											yes
AT3G01830	Calcium-binding EF-hand family protein	protein_coding							2.54211	not assigned.annotated		NA		NA		NA		NA		3.1611									yes
AT5G55660	DEK domain-containing chromatin associated protein	protein_coding							0.931681	not assigned.not annotated		0.565953		0.64554		0.239589		0.228833			0.14	0.0028	0.26	0	0.18	0.0013	0.06	0.18	one shared phosphosite: S86 in atm/atr data		1.15	0.0032	0.56	0.28	-0.24	0.29	0.35	0.08		-0.0784741		-0.794681		-0.206796		0.509411
AT4G13510	Encodes a plasma membrane localized ammonium transporter. Contains a cytosolic trans-activation domain essential for ammonium uptake. The mRNA is cell-to-cell mobile.	protein_coding	AMMONIUM TRANSPORTER 1;1 (AMT1;1)	AMMONIUM TRANSPORTER 1;1 (AMT1;1); (ATAMT1;1);ARABIDOPSIS THALIANA AMMONIUM TRANSPORT 1 (ATAMT1)	AMT1;1					Solute transport.channels.AMT family.ammonium transporter (AMT1-type)																			two shared phosphosites: S488, T499 both in atm/atr data		-1.14	0.57	-1.25	0.19	1.28	0.18	1.39	0.037		0.237358		-0.227667		0.188172		0.653197
AT1G52380	NUP50 (Nucleoporin 50 kDa) protein	protein_coding								Protein translocation.nucleus.nucleocytoplasmic transport.nuclear pore complex (NPC).nuclear basket.NUP50 nucleoporin	-0.833393	0.00313636	0.531322	0.0441614	0.647162	0.0316274	-0.717553	0.00127501			0.06	0.58	0.31	0	0.26	0.00019	0.02	0.63	one shared phosphosite: S4 in atm/atr data		-0.43	0.72	-0.9	0.45	-0.05	0.59	0.43	0.62		-0.26039		-0.482782		-0.553598		-0.331206
AT5G10010	myosin-H heavy protein	protein_coding	HEAT INTOLERANT 4 (HIT4)	HEAT INTOLERANT 4 (HIT4)	HIT4					not assigned.annotated	-1.19366	2.87697e-06		0.254708		0.0927445	-0.990931	4.8485e-06	-1.24261	-1.45246	0.22	0.035	0.42	0	0.22	0.00063	0.02	0.36	one shared phosphosite: S39 in atm/atr data		0.03	0.42	0.43	0.75	-0.28	1	-0.68	1		-0.011588		-0.643856		-0.877381		-0.245112
AT1G33680	KH domain-containing protein	protein_coding							2.91938	not assigned.not annotated		0.928105		0.152012		0.924991		0.120416			0	0.51	0.12	0.05	0.19	0.0061	0.08	0.15	one shared phosphosite: S156 in atm/atr		0.5	0.51	0.48	0.51	-0.08	0.56	-0.06	0.56		-0.475338		-0.974909		0.0174874		0.517058
AT3G42170	transposase-like gene with conserved domains from the family of hAT transposases that includes hobo from Drosophila melanogaster, Activator (Ac) from maize, and Tam3 from snapdragon but lacks several amino acids known to be essential for Ac transposition5. The DAYSLEEPER gene lacks 8 bp duplications and TIRs (a common feature of transcriptionally silent hAT transposases), however, DAYSLEEPER expr…	protein_coding	DAYSLEEPER (DAYSLEEPER)	DAYSLEEPER (DAYSLEEPER)	DAYSLEEPER				1.40334	not assigned.annotated		0.917292	0.359725	0.0414328		0.486864		0.388746			-0.01	0.44	0.18	0.28	0.12	0.96	-0.07	0.92	two shared phosphosites: S12, T15 both in atm/atr data		-1.12	0.52	-0.98	0.37	0.76	0.55	0.61	0.43		0.111748		-0.546743		-0.270221		0.388271
AT1G14570	Encodes a nuclear UBX-containing protein that can bridge ubiquitin to AtCDC48A.	protein_coding	PLANT UBX DOMAIN-CONTAINING PROTEIN 7 (PUX7)	(ATPUX7);PLANT UBX DOMAIN-CONTAINING PROTEIN 7 (PUX7)	PUX7				5.03435	not assigned.annotated		0.228866		0.523399		0.988275		0.570515			-0.12	0.66	-0.16	0.045	0.01	0.059	0.05	0.64	yes, but not same phosphosite		-17.99	0.055	-0.83	0.86	16.79	0.14	-0.37	0.46		0.238512		-0.325986		-0.24664		0.317858
AT3G27700	zinc finger (CCCH-type) family protein / RNA recognition motif (RRM)-containing protein	protein_coding							3.67211	not assigned.annotated		0.692992		0.977212		0.901067		0.402434											yes, but not same phosphosite		-2.56	0.2	-0.62	0.72	2.2	0.2	0.25	0.75	-1.078	-1.078		0.452512		0.736966		-0.793549
AT5G49400	zinc knuckle (CCHC-type) family protein	protein_coding							2.0091	not assigned.not annotated		0.629342		0.582599		0.768655		0.355444											yes, but not same phosphosite		-1.82	0.63	-1.77	0.58	0.03	1	-0.02	0.75		-0.208947		-0.668379		-0.408806		0.0506261
AT5G16780	Encodes a protein belonging to SART-1 family. The gene is expressed in the basal region of the developing embryo during heart stage. Phenotypic analyses of dot2 mutants suggest that this protein plays a role in root, shoot, and flower development. dot2 mutants are dwarved plants that display an aberrant spurred leaf venation pattern and fail to flower. In the roots DOT2 appears to be require for …	protein_coding	DEFECTIVELY ORGANIZED TRIBUTARIES 2 (DOT2)	MERISTEM-DEFECTIVE (MDF);DEFECTIVELY ORGANIZED TRIBUTARIES 2 (DOT2)	DOT2					not assigned.annotated		0.980114		0.12258		0.94342		0.134075			0.24	0.15	0.26	0.1	0.13	0.27	0.11	0.46	yes, but not same phosphosite		-1.75	0.031	0.1	0.15	1.69	0.0094	-0.16	0.73		-0.219781	-1.16601	-1.16601		-0.433416		0.512813
AT3G22220	hAT transposon superfamily	protein_coding								not assigned.not annotated		0.96688		0.524483		0.64617		0.974072											yes, but not same phosphosite		-1.49	0.98	-1.72	0.79	0.48	0.51	0.71	0.82		-0.0144996		-0.888969		-0.698619		0.17585
AT2G19520	Controls flowering.	protein_coding	(FVE)	(FVE); (ACG1); (ATMSI4); (NFC4); (NFC04);MULTICOPY SUPPRESSOR OF IRA1 4 (MSI4)	FVE					Chromatin organisation.histone chaperone activities.CAF1 histone chaperone complex.CAF1c/MSI component	-0.525248	0.0413213		0.324489		0.633674	-0.62223	0.00268528			0.11	0.54	0.08	0.76	-0.04	0.29	-0.01	0.71	yes, but not same phosphosite		-1.15	0.22	-1.54	0.12	0.16	0.82	0.55	0.87		-0.296982		-0.684798		-0.101377		0.286439
AT2G16485	Encodes NERD (Needed for RDR2-independent DNA methylation), a plant-specific GW repeat- and PHD finger-containing protein involved in siRNA-dependent DNA methylation.	protein_coding	NEEDED FOR RDR2-INDEPENDENT DNA METHYLATION (NERD)	NEEDED FOR RDR2-INDEPENDENT DNA METHYLATION (NERD)	NERD					not assigned.annotated		0.831739		0.0947741		0.662456	-0.522789	0.00138458			-0.4	0.2	0.31	0.12	0.47	0.21	-0.24	0.3	yes, but not same phosphosite		-1.1	0.87	-0.93	1	0.04	0.86	-0.13	0.75		0		-0.597241		-0.141176		0.456065
AT3G54760	dentin sialophosphoprotein-like protein	protein_coding							1.07911	not assigned.not annotated	-0.456747	0.030989	0.400385	0.0450604		0.193542	-0.544537	0.0014635			0.04	0.63	0.25	0.02	0.21	0.0061	0	0.88	yes, but not same phosphosite		-0.8	0.21	-0.89	0.2	0.48	0.72	0.57	0.65		-0.334419		-0.828234		-0.367057		0.126757
AT5G44800	chromatin remodeling 4	protein_coding	CHROMATIN REMODELING 4 (CHR4)	CHROMATIN REMODELING 4 (CHR4);PICKLE RELATED 1 (PKR1); (MI-2-LIKE)	CHR4					Chromatin organisation.chromatin remodeling complexes.ATPase core components.Snf2-like group.Chd3/Mi-2 chromatin remodeling factor		0.169388		0.964186		0.103736	-0.542984	7.34864e-05											yes, but not same phosphosite		-0.71	0.63	-6.78	0.2	0.89	0.26	6.96	0.055		0.0614005		-0.665581		-0.0151069		0.711875
AT4G39680	SAP domain-containing protein	protein_coding								RNA processing.RNA quality control Exon Junction complex (EJC).peripheral components.ACINUS component	-0.540886	0.0227672		0.767723		0.859919	-0.517196	0.0132908			0.27	0.024	0.34	0.022	0.09	0.9	0.02	0.98	yes, but not same phosphosite		-0.62	0.071	-0.72	0.011	0.11	0.056	0.21	0.0029		-0.229482		-0.443607		0.164387		0.378512
AT1G15340	Protein containing methyl-CpG-binding domain.Has sequence similarity to human MBD proteins.	protein_coding	METHYL-CPG-BINDING DOMAIN 10 (MBD10)	METHYL-CPG-BINDING DOMAIN 10 (MBD10)	MBD10				0.711422	not assigned.annotated	0.39201	0.0379099		0.388839	-0.390992	0.0405081		0.33299			0.05	0.87	0.16	0.04	0.12	0.17	0.01	0.5	yes, but not same phosphosite		-0.23	0.63	-0.36	0.56	-0.6	0.034	-0.47	0.083		0.174029		-0.495325		-0.302927		0.366428
AT4G26630	Encodes a chromatin-associated protein that specifically binds histones H3 and H4 and contributes to modulation of Arabidopsis chromatin structure and function.	protein_coding	DEK-DOMAIN CONTAINING PROTEIN 3 (DEK3)	DEK-DOMAIN CONTAINING PROTEIN 3 (DEK3)	DEK3					not assigned.not annotated		0.0820789		0.983866		0.0650058		0.950422			0.28	0.011	0.26	0.018	0.04	0.4	0.06	0.19	yes, but not same phosphosite		0.11	0.074	0.24	0.28	0.37	0.87	0.24	0.37		0.121745		-0.612443		-0.310507		0.423682
AT5G40340	PWWP domain protein involved in regulation of FLC and flowering time.	protein_coding	PWWP DOMAIN PROTEIN 3 (PDP3)	PWWP DOMAIN PROTEIN 3 (PDP3)	PDP3					not assigned.not annotated		0.970462		0.881249		0.0871198		0.0988363											yes, but not same phosphosite		0.48	0.62	-0.62	0.97	0.19	0.9	1.29	0.36		0.112894		-0.61891		-0.217231		0.514573
AT5G12410	THUMP domain-containing protein	protein_coding							6.07108	not assigned.not annotated		0.754594		0.558913		0.621387		0.668367			0.06	0.95	0.44	0.00017	0.46	0.0037	0.08	0.15	yes, but not same phosphosite		0.76	0.34	0.93	0.2	0.15	0.58	-0.02	0.92		-0.272526		-0.286881		0.380708		0.395063
AT3G58110	hypothetical protein	protein_coding								not assigned.not annotated		0.994134		0.303909		0.229744		0.852457			0.02	0.83	0.01	0.56	-0.18	0.28	-0.17	0.25	yes, but not same phosphosite		0.81	0.11	2.9	0.018	0.57	0.27	-1.52	0.047		0.145198		-0.478654		-0.588805		0.0350469
AT5G10360	RPS6A and RPS6B are fully redundant and essential during gametogenesis.	protein_coding	EMBRYO DEFECTIVE 3010 (EMB3010)	RIBOSOMAL PROTEIN SMALL SUBUNIT 6B (RPS6B);EMBRYO DEFECTIVE 3010 (EMB3010)	EMB3010	eS6b			0.718405	Protein biosynthesis.cytosolic ribosome.small subunit (SSU).SSU proteome.RPS6 component	-1.10778	1.05731e-09		0.247985		0.23654	-1.07881	6.63454e-10			-0.13	0.3	0	0.96	0.05	0.91	-0.08	0.13			-25.44	0	-0.02	0.91	4.18	0.46	-21.24	0.00027		-0.701659		-0.243669		0.312384		-0.145605
AT1G67910	hypothetical protein	protein_coding							2.32587	not assigned.not annotated	0.750159	0.018691		0.390246		0.722772	0.588703	0.0249462													-22.92	0.28	-8.3	0.56	23.53	0.05	8.92	0.56		0.0975165		-0.252981		-0.314873		0.0356239
AT5G17910	cardiomyopathy-associated protein	protein_coding							3.3563	not assigned.not annotated		0.567961	0.519198	0.00289238		0.305016	-0.430261	0.0077437			0.25	0.3	0.26	0.068	-0.1	0.86	-0.11	0.17			-22.33	0.0071	-18.82	0.39	0	0.56	-3.52	0.037		-0.209923		-0.884523		-0.55486		0.119739
AT5G51100	Fe superoxide dismutase whose mRNA levels are increased in response to exposure to UV-B.	protein_coding	FE SUPEROXIDE DISMUTASE 2 (FSD2)	FE SUPEROXIDE DISMUTASE 2 (FSD2)	FSD2					RNA biosynthesis.organelle machineries.RNA polymerase activities.plastid-encoded RNA polymerase (PEP) complex.essentiell co-factors.PAP9/FSD2 component		0.761672		0.0526907		0.21613		0.982137			0.1	0.7	0.08	0.94	-0.02	0.91	0	0.65			-21.28	0.51	-21.26	0.05	12.58	0.56	12.55	1		0.117652		-0.570887		-0.39776		0.290779
AT3G18290	Encodes BRUTUS (BTS), a putative E3 ligase protein with metal ion binding and DNA binding domains, which negatively regulates the response to iron deficiency. The mRNA is cell-to-cell mobile.	protein_coding	BRUTUS (BTS)	BRUTUS (BTS);EMBRYO DEFECTIVE 2454 (EMB2454)	BTS				0.986522	Nutrient uptake.iron uptake.regulation.HRZ/BRUTUS iron-binding sensor		0.827959		0.688276		0.330496		0.345375													-21.22	0.13	-21.89	0.25	20.61	0.13	21.28	0.25		-0.0218594		-0.807355		-0.404066		0.381429
AT2G16920	ubiquitin-conjugating enzyme 23	protein_coding	UBIQUITIN-CONJUGATING ENZYME 23 (UBC23)	PHO2 FAMILY UBIQUITIN CONJUGATION ENZYME 2 (PFU2);UBIQUITIN-CONJUGATING ENZYME 23 (UBC23)	UBC23					not assigned.annotated		0.586484	0.612224	0.00126747		0.650179	-0.63478	0.000112867			-0.25	0.25	0.31	0.13	0.46	0.041	-0.1	0.36			-19.63	0.83	-21.34	0.28	11.95	1	13.66	0.56		-0.310929		-0.683973		-0.259387		0.113657
AT1G12360	encodes a Sec1 protein and expressed throughout the plant. physically interacts with Syntaxin1 and is required for cytokinesis.	protein_coding	KEULE (KEU)	(SEC11);KEULE (KEU)	KEU					Cell cycle.cytokinesis.cell-plate formation.KEULE cell-plate-SNARE assembly protein		0.176008		0.727892		0.380251	0.380419	0.0110541			-0.51	0.28	0.03	0.83	0.42	0.56	-0.12	0.56			-19.47	0.51	3.32	0.13	21.07	0.083	-1.72	0.083		-0.0139392		-0.36059		-0.364572		-0.0179219
AT5G28040	Member of the GeBP/GPL family of leucine zipper transcription factors. VPF4 interacts with the F-box proteins from A.tumefaciens VirF and VBF. Over expression results in decreased tumor formation upon Agrobacterium infection. Mutants show changes in the level of expression of defense response genes.	protein_coding	VIRF INTERACTING PROTEIN 4 (VFP4)	VIRF INTERACTING PROTEIN 4 (VFP4)	VFP4				2.20645	RNA biosynthesis.transcriptional activation.GeBP transcription factor		0.994034		0.981601		0.921848		0.921168													-18.81	0.51	-19.26	0.83	11.7	1	12.16	0.56		0.324002		-0.70955		-0.360794		0.672758
AT3G16060	ATP binding microtubule motor family protein	protein_coding								Cytoskeleton.microtubular network.Kinesin microtubule-based motor protein activities.Kinesin-13 motor protein		0.385433		0.230456		0.884807		0.695668													-17.81	0.2	-1.19	0.72	16.29	0.47	-0.33	0.83		-0.11456		-0.525628		-0.349008		0.062061
AT3G61480	Quinoprotein amine dehydrogenase, beta chain-like	protein_coding							1.14907	not assigned.not annotated		0.69067		0.0870303		0.617525		0.714511													-17.66	0.52	-17.06	0.86	16.37	0.36	15.78	0.6
AT1G29350	RNA polymerase II degradation factor-like protein (DUF1296)	protein_coding								not assigned.not annotated		0.59399	0.595118	0.0307223		0.388538		0.0524638													-11.36	0.83	-11.69	0.28	1.14	1	1.47	1
AT5G52530	dentin sialophosphoprotein-like protein	protein_coding							1.35128	not assigned.not annotated		0.280781		0.315508		0.600366		0.608584													-10.24	0.015	-10.11	0.071	1.21	0.056	1.09	0.33		0.0931094		-0.871267		-0.403065		0.561311
AT4G10760	Encodes a member of a core set of mRNA m6A writer proteins and is required for N6-adenosine methylation of mRNA.	protein_coding	MRNAADENOSINE METHYLASE (MTA)	MRNAADENOSINE METHYLASE (MTA);EMBRYO DEFECTIVE 1706 (EMB1706)	MTA				2.74935	RNA processing.RNA modification.mRNA methylation.adenosine N6-methyltransferase complex.MTA component	-0.596528	0.0487105		0.703374		0.621387	-0.530396	0.0259559													-9.6	0.42	-9.13	0.58	1.92	1	1.45	0.92		-0.0931094		-0.61753		-0.419625		0.104796
AT5G45900	Component of autophagy conjugation pathway. Required for proper senescence. Contributes to plant basal immunity towards fungal infection.	protein_coding	AUTOPHAGY 7 (APG7)	AUTOPHAGY-RELATED 7 (ATG7);AUTOPHAGY 7 (APG7); (ATAPG7); (ATATG7);PEROXISOME UNUSUAL POSITIONING 4 (PEUP4)	APG7				2.29919	Vesicle trafficking.autophagosome formation.ATG8/ATG12 conjugation system.ATG7 ATG8/12-activating E1 protein		0.812093		0.774761		0.436349		0.327026		1.27397											-7.72	0.15	0.35	0.47	6.6	0.58	-1.47	0.076		0.282639		-0.24591		-0.229787		0.298762
AT5G46750	A member of ARF GAP domain (AGD), A thaliana has 15 members, grouped into four classes. The mRNA is cell-to-cell mobile.	protein_coding	ARF-GAP DOMAIN 9 (AGD9)	ARF-GAP DOMAIN 9 (AGD9);ARF-GAP DOMAIN 8 (AGD8)	AGD9					Vesicle trafficking.Coat protein I (COPI) coatomer machinery.ARF-GTPase-activating (ARF-GAP) activities.class II ARF-GAP protein		0.257462		0.750141		0.264323		0.713444			-0.41	0.19	-0.22	0.31	0.41	0.2	0.21	0.13			-7.68	0.34	-6.34	0.86	0.73	0.86	-0.61	0.12		0.445524		-0.12883		-0.416813		0.157541
AT5G43960	Nuclear transport factor 2 (NTF2) family protein with RNA binding (RRM-RBD-RNP motifs) domain-containing protein	protein_coding		GTPASE?ACTIVATING PROTEIN SH3-DOMAIN?BINDING PROTEIN LIKE (G3BP-LIKE)						not assigned.not annotated	-1.44736	2.7986e-09		0.133445		0.101866	-1.34054	2.16385e-10	-1.35089		0.07	0.59	0.17	0.35	0.15	0.017	0.05	0.026			-7.37	0.25	-8.88	0.065	1.86	0.76	3.37	0.34		-0.202629		-0.451989		0.0995357		0.348895
AT1G27430	GYF domain-containing protein	protein_coding								not assigned.not annotated		0.413109		0.178442		0.724226		0.371078													-7.27	0.34	-7.08	0.58	1.44	0.58	1.24	0.92		0.265894	-1	-1		-0.318361		0.947533
AT2G17820	Encodes a member of the histidine kinase family.	protein_coding	HISTIDINE KINASE 1 (HK1)	HISTIDINE KINASE 1 (ATHK1);HISTIDINE KINASE 1 (HK1); (AHK1)	HK1					not assigned.annotated		0.962447		0.222963		0.960836		0.101398													-7.04	0.11	-21.83	0.018	3.16	0.47	17.95	0.4		-0.50696	-1.05445	-1.05445		0.127112		0.6746
AT5G40200	Encodes a putative DegP protease. The mRNA is cell-to-cell mobile.	protein_coding	DEGRADATION OF PERIPLASMIC PROTEINS 9 (DEG9)	DEGP PROTEASE 9 (DegP9);DEGRADATION OF PERIPLASMIC PROTEINS 9 (DEG9)	DEG9				1.37601	Protein degradation.peptidase families.serine-type peptidase activities.Deg protease		0.291018	0.494749	0.0413882		0.138337		0.083047													-6.97	0.57	-7.7	0.21	-0.13	0.43	0.59	0.56		-0.345996		-0.858644		-0.323614		0.189034
AT1G16850	transmembrane protein	protein_coding							0.705215	not assigned.not annotated		NA		NA		NA		0.769083		-2.59022											-6.93	0.52	-6.3	1	0.01	0.72	-0.63	0.12								-0.102635
AT3G60380	cotton fiber protein	protein_coding								not assigned.not annotated		0.48963		0.206945		0.905499		0.555885		-1.10656											-6.81	0.17	-3.86	0.86	2.65	0.47	-0.3	0.75		0.108253		-0.840522		-0.39776		0.551015
AT1G24267	bZIP transcription factor, putative (DUF1664)	protein_coding							3.62894	not assigned.not annotated	-0.585323	0.0323728		0.9934		0.576847		0.0903774													-6.65	0.15	-7.55	0.1	-0.32	0.47	0.58	0.75		-0.263034		-0.289507		0.0766213		0.103093
AT4G18950	BHP1 is a Raf-like protein kinase involved in mediating blue light dependent stomatal opening.	protein_coding	BLUE LIGHT-DEPENDENT H+-ATPASE PHOSPHORYLATION (BHP)	BLUE LIGHT-DEPENDENT H+-ATPASE PHOSPHORYLATION (BHP)	BHP				0.713544	Protein modification.phosphorylation.TKL kinase superfamily.MAP3K-RAF kinase		0.0557576		0.998883		0.566227		0.236741		1.47681	0.25	0.052	0.29	0.027	0.01	0.75	-0.03	0.91			-5.38	0.87	-5.9	0.67	-0.78	0.42	-0.26	0.2		0.114643		-0.327362		-0.401741		0.0402639
AT3G25520	Encodes ribosomal protein L5 that binds to 5S ribosomal RNA and in involved in its export from the nucleus to the cytoplasm. Identified in a screen for enhancers of as1. as1/pgy double mutants show defects in leaf vascular patterning and adaxial cell fate. Double mutant analysis indicates pgy genes function in the same pathway as REV, KAN1 and KAN2.	protein_coding	RIBOSOMAL PROTEIN L5 (ATL5)	OLIGOCELLULA 5 (OLI5);PIGGYBACK3 (PGY3);RIBOSOMAL PROTEIN L5 (ATL5);RIBOSOMAL PROTEIN L5 A (RPL5A)	ATL5	uL18a			1.62619	Protein biosynthesis.cytosolic ribosome.large subunit (LSU).LSU proteome component.RPL5 component	-1.55727	8.63468e-26		0.23831	0.541728	0.00231261	-1.25279	6.48209e-18		-1.4276	-0.05	0.52	0.2	0.01	0.36	0	0.11	0.93			-5.32	0.023	-4.57	0.027	1.63	0.79	0.87	0.82		-0.293731		-0.475338		-0.199309		-0.017702
AT1G11480	eukaryotic translation initiation factor-like protein	protein_coding							0.455541	not assigned.not annotated	0.405863	0.0126797		0.802914		0.943174	0.367055	0.00721434													-4.85	0.83	-3.79	0.83	-1.42	0.56	-2.48	0.25		-0.195256		-0.195256		-0.108524		-0.108524
AT5G03630	Pyridine nucleotide-disulfide oxidoreductase family protein	protein_coding	(MDAR2)	(MDAR2)	MDAR2				0.260269	Redox homeostasis.hydrogen peroxide removal.ascorbate-glutathione cycle.monodehydroascorbate reductase (MDAR)		0.782955	0.795366	3.03958e-07		0.0516908	-0.497992	0.00110655	-1.14475		-0.09	0	0.17	0.1	0.17	0.0071	-0.09	0.003			-4.62	0.11	-3.84	0.58	2.5	0.068	1.72	0.35		-0.145511		-0.606416		-0.292782		0.168123
AT3G22270	Topoisomerase II-associated protein PAT1	protein_coding	PAT1 HOMOLOG 1 (PAT1H1)	(ATPAT1H1);PAT1 HOMOLOG 1 (PAT1H1)	PAT1H1				5.4359	not assigned.annotated		0.73927		0.119134		0.160788		0.694445													-4.42	0.19	-3.36	0.98	0	0.88	-1.06	0.28		-0.530515		-0.752907		0.280108		0.5025
AT5G21160	Encodes a protein with sequence similarity to mRNA binding proteins from humans. LARP1a is involved in mRNA degradation in response to heat stress. Upon heat stress LARP1a interacts with XRN4 and appears to be responsible for addressing XRN4 to the polysome. LARP1/XRN4 double mutants are impaired in thermotolerance and lower levels of heat induced RNA turnover.	protein_coding	LA RELATED PROTEIN 1A (LARP1A)	LA RELATED PROTEIN 1A (LARP1A);LA RELATED PROTEIN 1A (ATLARP1A)	LARP1A				2.99607	RNA processing.RNA decay.deadenylation-dependent mechanism.LARP1 XRN4-exoribonuclease cofactor		0.604131	-4.05862	3.99027e-07	-2.31405	0.0102488		0.265641			-0.08	0.35	-3.71	0.0039	-2.97	0.0026	0.67	0.3			-4.26	0.054	n/a	n/a	n/a	n/a	n/a	n/a		0.335791
AT5G22450	spectrin beta chain, brain	protein_coding							0.492037	not assigned.not annotated		0.0542089		0.184279		0.9063		0.441947		0.222825											-4.15	0.51	-5.53	0.1	0.42	0.79	1.81	0.13		0.0853915		-0.657112		-0.40952		0.332983
AT5G09620	Octicosapeptide/Phox/Bem1p family protein	protein_coding								not assigned.not annotated		0.960625		0.961223		0.886103		0.953415			-0.23	0.37	-0.1	0.63	-0.12	0.94	-0.25	0.55			-4.05	0.64	-7.19	0.088	-0.81	0.5	2.34	0.91		0.130256		-0.434096		-0.164745		0.399607
AT4G38470	ACT-like protein tyrosine kinase family protein	protein_coding	SERINE/THREONINE/TYROSINE KINASE 46 (STY46)	SERINE/THREONINE/TYROSINE KINASE 46 (STY46)	STY46					Protein modification.phosphorylation.TKL kinase superfamily.MAP3K-RAF kinase		0.301693	-1.06822	9.69444e-08	-1.07607	9.87355e-08		0.281406	2.94716	2.05786	0.37	0.2	0.02	0.41	-0.28	0.11	0.08	0.29			-4.03	0.15	-4.47	0.18	3.26	0.27	3.71	0.25		0.125531		-0.271805		-0.103836		0.2935
AT5G64330	Involved in blue light response signaling pathway; interacts with the blue light photoreceptor NPH1. Null mutations abolish phototrophic responses of etiolated seedlings to low fluence blue light. Protein contains multiple protein-protein interaction domains.	protein_coding	NON-PHOTOTROPIC HYPOCOTYL 3 (NPH3)	NON-PHOTOTROPIC HYPOCOTYL 3 (NPH3); (JK218);ROOT PHOTOTROPISM 3 (RPT3)	NPH3				1.10382	not assigned.annotated		0.978374	0.496335	0.0208891		0.410236		0.266065													-3.95	0.75	-2.98	0.86	0.71	0.045	-0.25	0.75		-0.429251		-0.820676		0.0352755		0.4267
AT4G17330	gene of unknown function expressed in seedlings, flower buds and stems	protein_coding	G2484-1 PROTEIN (G2484-1)	G2484-1 PROTEIN (G2484-1);G2484-1 PROTEIN (ATG2484-1)	G2484-1					not assigned.not annotated		0.828956		0.29545		0.739888	-0.322915	0.0265469			-0.01	0.86	0.21	0.011	0.2	0.035	-0.02	0.83			-3.91	0.26	-4.85	0.045	0.79	0.36	1.73	0.17		0.0489096		-0.770518		-0.165424		0.654004
AT2G35880	TPX2 (targeting protein for Xklp2) protein family	protein_coding								Cytoskeleton.microtubular network.microtubule dynamics.WDL microtubule-stabilizing factor	0.724679	8.44727e-06		0.556381		0.977222	0.596194	3.21294e-05			0.02	0.79	0	0.88	0.04	0.94	0.06	0.51			-3.85	0.23	-3.64	0.79	6.77	0.21	6.56	0.73		-0.217591	-1.18442	-1.18442		-0.370982		0.595851
AT2G01190	Octicosapeptide/Phox/Bem1p family protein	protein_coding	PIGMENT DEFECTIVE 331 (PDE331)	PIGMENT DEFECTIVE 331 (PDE331)	PDE331					not assigned.not annotated		0.286671	-1.21236	3.27253e-05	-1.16867	0.000161336		0.31318		0.646379	0.03	0.86	-0.17	0.31	0.17	0.27	0.36	0.083			-3.74	0	-2.92	0.016	0.77	0.45	-0.05	0.17		0.355762		0.90526	1.05161	1.05161		0.502116
AT2G35410	RNA-binding (RRM/RBD/RNP motifs) family protein	protein_coding								not assigned.annotated		0.0883433	-0.450867	0.0175932	-0.430524	0.0430284		0.060208			0.01	0.6	-0.19	0.055	-0.19	0.0016	0.01	0.59			-3.73	0.078	-20.35	0.0065	2.79	0.67	19.41	0.033		-0.15277		-0.191659		0.067463		0.106352
AT5G27030	TOPLESS-related 3	protein_coding	TOPLESS-RELATED 3 (TPR3)	TOPLESS-RELATED 3 (TPR3)	TPR3				1.44672	RNA biosynthesis.transcriptional repression.TPL/TPR transcriptional co-repressor	0.625203	0.00853181		0.146086		0.794881		0.120353													-3.65	0.23	-3.09	0.37	0.74	0.043	0.18	0.25		0.0897967		-0.501398		-0.123271		0.467923
AT5G47660	Homeodomain-like superfamily protein	protein_coding								RNA biosynthesis.transcriptional activation.Trihelix transcription factor		0.331043		0.792586		0.944129	-0.87277	0.0412277													-3.63	0.75	0.46	0.72	1.73	0.36	-2.36	0.6							1.02385	1.02385
AT2G30530	zinc finger CCCH domain protein	protein_coding	(MADA4)	(MADA4)	MADA4					Cytoskeleton.microfilament network.myosin microfilament-based motor protein activities.MadA myosin adaptor protein		0.123916		0.878693		0.924169		0.0552536													-3.57	0.27	-4.2	0.025	0.14	0.95	0.77	0.15		-0.49304		-0.270648		0.425022		0.202629
AT3G08850	Encodes one of two Arabidopsis RAPTOR/KOG1 homologs. RAPTOR proteins are binding partners of the target of rapamycin kinase that is present in all eukaryotes and play a central role in the stimulation of cell growth and metabolism in response to nutrients. Mutants show embryo lethal phenotype which occurs at pre-globular stage. May interact with TOR kinase in a rapamycin like signaling pathway. I…	protein_coding	(RAPTOR1)	(RAPTOR1B); (RAPTOR1); (ATRAPTOR1B)	RAPTOR1				2.33149	Multi-process regulation.TOR signalling pathway.TORC complex.RAPTOR regulatory component	0.549331	2.09517e-05		0.739904	-0.345978	0.0143444	0.27165	0.0400501		0.751211											-3.48	0.037	-1.76	1	1.16	0.068	-0.57	0.17		0.326228		-0.365649		-0.0435893		0.648288
AT5G63310	Maintains intracellular dNTP levels except ATP. Plays a role in response to oxidative stress and UV. Involved in phytochrome-mediated light signaling. Participates in auxin-regulated processes, partly through the modulation of auxin transport. H-bonding with His-197 inside the nucleotide-binding pocket is critical for NDPK2 functioning.	protein_coding	NUCLEOSIDE DIPHOSPHATE KINASE 2 (NDPK2)	ARABIDOPSIS NUCLEOSIDE DIPHOSPHATE KINASE 2 (ATNDPK2); (NDPK IA IA);NDP KINASE 1A (NDPK1A);NUCLEOSIDE DIPHOSPHATE KINASE 2 (NDPK2);NUCLEOSIDE DIPHOSPHATE KINASE IA (NDPK IA)	NDPK2				0.212687	Nucleotide metabolism.deoxynucleotide metabolism.nucleoside diphosphate kinase		0.0820023		0.666942		0.981444		0.249774		-1.90537	-0.1	0.4	-0.07	0.33	-0.04	0.17	-0.08	0.42			-3.47	0.15	-1.81	0.47	1.12	0.93	-0.54	0.75		-0.0879965		-0.0699626		-0.0985638		-0.116598
AT3G63460	transducin family protein / WD-40 repeat family protein	protein_coding	(SEC31B)	(SEC31B)	SEC31B				2.33667	Vesicle trafficking.Coat protein II (COPII) coatomer machinery.coat protein complex.Sec31 scaffolding component	-0.407757	0.0404672	0.39171	0.0446679		0.95798	-0.779694	1.53059e-06			-0.01	0.8	0.18	0.0054	0.21	0.012	0.02	0.91			-3.45	0.27	-2.81	1	1.39	0.16	0.75	0.85		-0.0645403		-0.752072		-0.143646		0.543887
AT2G42600	Encodes one of four Arabidopsis phosphoenolpyruvate carboxylase proteins.PPC1 and PPC2 are crucial for balancing carbon and nitrogen metabolism.	protein_coding	PHOSPHOENOLPYRUVATE CARBOXYLASE 2 (PPC2)	PHOSPHOENOLPYRUVATE CARBOXYLASE 2 (PPC2);PHOSPHOENOLPYRUVATE CARBOXYLASE 2 (ATPPC2)	PPC2					Photosynthesis.CAM/C4 photosynthesis.phosphoenolpyruvate (PEP) carboxylase activity.PEP carboxylase		0.460383		0.999332		0.102145		0.454687	-1.09607		-0.17	0.066	-0.09	0.26	0.04	0.26	-0.03	0.061			-3.32	0.0039	-0.24	0.36	1.81	0.018	-1.27	0.009		-0.068306		-0.706708		-0.0995357		0.538866
AT5G55230	Binds and bundles microtubules. Plays a role in stabilizing anti-parallel microtubules in the central spindle at anaphase to early cytokinesis but is not essential at the midline of the phragmoplast at later stages. The timing with which the MAP65-1 was targeted to the spindle appears to be regulated by a phosphorylation sensitive switch. Enhances microtubule polymerization, promotes nucleation a…	protein_coding	MICROTUBULE-ASSOCIATED PROTEINS 65-1 (MAP65-1)	MICROTUBULE-ASSOCIATED PROTEINS 65-1 (MAP65-1)	MAP65-1					not assigned.annotated		0.308106		0.507142		0.855772	-0.31081	0.0472232			-0.07	0.72	0.04	0.36	-0.04	0.88	-0.15	0.15			-3.22	0.011	-2.5	0.024	2.26	0.005	1.53	0.019		-0.0246621		-0.739685		-0.382248		0.332775
AT3G10480	Encodes a NAC transcription factor that physically associates with the histone H3K4 demethylase JMJ14 and through that association is involved in transcriptional repression and flowering time control. It binds the NAC-binding site, the Mitochondrial Dysfunction Motif.	protein_coding	NAC DOMAIN CONTAINING PROTEIN 50 (NAC050)	NAC DOMAIN CONTAINING PROTEIN 50 (ANAC050); (NAC50);NAC DOMAIN CONTAINING PROTEIN 50 (NAC050)	NAC050				1.03427	RNA biosynthesis.transcriptional activation.NAC transcription factor		0.192603		0.766242		0.850696		0.472271													-3.19	0.27	-3.3	0.18	3.48	0.19	3.6	0.049		0.140863		-0.183864		-0.433798		-0.109072
AT5G45190	Encodes a cyclin T partner CYCT1;5. Plays important roles in infection with Cauliflower mosaic virus (CaMV).	protein_coding							5.63252	RNA biosynthesis.RNA polymerase II-dependent transcription.phosphorylation/dephosphorylation.polymerase-II kinase complex (CTDK-I).cyclin-type regulator component		0.691287		0.500078		0.885171		0.991973													-3.19	0.75	-5.68	0.011	-0.71	0.36	1.78	0.076		0.0274807		-0.342888		-0.188762		0.181607
AT4G26760	microtubule-associated protein 65-2	protein_coding	MICROTUBULE-ASSOCIATED PROTEIN 65-2 (MAP65-2)	MICROTUBULE-ASSOCIATED PROTEIN 65-2 (MAP65-2)	MAP65-2				3.67955	Cell cycle.cytokinesis.phragmoplast microtubule organization.MAP65-2 microtubule-associated protein		0.340426	0.683846	0.00549918	0.654413	0.0179546		0.146806	-1.58279	-1.84413											-3.06	0.15	-1.55	0.47	3.56	0.14	2.05	0.46		0.188204		-0.608809		-0.595379		0.201634
AT5G19450	calcium-dependent protein kinase (CDPK19) mRNA, complete	protein_coding	CALCIUM-DEPENDENT PROTEIN KINASE 19 (CDPK19)	(CPK8);CALCIUM-DEPENDENT PROTEIN KINASE 19 (CDPK19)	CDPK19					Protein modification.phosphorylation.CAMK kinase superfamily.CDPK kinase		0.121925		0.174569		0.508853		0.237952													-3.05	0.062	-2.67	0.074	0.03	0.15	-0.35	0.024		-0.281771		-0.888107		-0.482601		0.123735
AT3G52930	Aldolase superfamily protein	protein_coding	FRUCTOSE-BISPHOSPHATE ALDOLASE 8 (FBA8)	(ATFBA8);FRUCTOSE-BISPHOSPHATE ALDOLASE 8 (FBA8)	FBA8				2.8777	Carbohydrate metabolism.sucrose metabolism.synthesis.cytosolic fructose-bisphosphate aldolase	-0.671162	0.000908518	0.662176	0.0011643		0.613443	-1.17276	6.73338e-11			-0.19	0.00023	0.02	0.87	0.2	0.00062	-0.01	0.6			-3.04	0.57	-3.45	0.15	-0.31	0.22	0.11	0.91		0.0212948		-0.494034		0.10446		0.619788
AT3G18230	Octicosapeptide/Phox/Bem1p family protein	protein_coding							0.745871	not assigned.not annotated		0.917015		0.251198		0.0578475		0.402079													-3.02	0.078	-1.27	0.56	3.6	0.13	1.85	0.66		0.316474	1.0665	1.0665	1.31536	1.31536		0.565334
AT4G15545	NAI1 interacting protein, involved in ER body formation.	protein_coding	NAI2-INTERACTING PROTEIN 1 (NAIP1)	NAI2-INTERACTING PROTEIN 1 (NAIP1)	NAIP1					not assigned.annotated		0.0737776	-1.05245	4.92939e-10	-0.758194	1.82238e-05	0.657577	0.000120633			-0.1	0.35	-0.07	0.41	-0.01	0.85	-0.04	0.97			-2.96	0.17	-3.2	0.34	-1.14	0.01	-0.89	0.01		0.366782		0.306661		-0.0911479		-0.0310269
AT4G01290	Protein with evolutionarily conserved eIF4E-binding motif in its N-terminal domain that can form mRNA cap?binding complexes and has the potential for regulating gene expression as a translation factor associated plant-specific cell cycle regulator.	protein_coding	CONSERVED BINDING OF EIF4E 1 (CBE1)	CONSERVED BINDING OF EIF4E 1 (CBE1)	CBE1				1.01888	not assigned.not annotated		0.703647		0.263599	-0.487877	0.0116189	-0.354996	0.0493323													-2.94	0.0031	-0.1	0.96	0.98	0.39	-1.86	0.028		-0.0437214		-0.111893		0.352672		0.420843
AT5G14050	Transducin/WD40 repeat-like superfamily protein	protein_coding							1.32404	not assigned.annotated	-1.6997	5.90067e-10		0.106129		0.193377	-1.66833	4.57203e-14	-1.40957												-2.92	0.011	-2.24	0.11	2.58	0.11	1.9	0.36		-0.37707		-0.643856		-0.117039		0.149747
AT5G20900	jasmonate-zim-domain protein 12	protein_coding	JASMONATE-ZIM-DOMAIN PROTEIN 12 (JAZ12)	(TIFY3B);JASMONATE-ZIM-DOMAIN PROTEIN 12 (JAZ12)	JAZ12				0.434751	RNA biosynthesis.transcriptional activation.TIFY transcription factor		0.827959		0.293494		0.642556		0.407887													-2.92	0.38	-2.51	0.8	1.23	0.13	0.83	0.49		0.434262		-0.117238		-0.277692		0.273808
AT4G15930	Dynein light chain type 1 family protein	protein_coding							1.43765	not assigned.annotated		0.18164		0.3738		0.955054	0.828339	0.0029793			0.15	0.42	0.08	0.69	-0.09	0.69	-0.03	0.82			-2.83	0.42	-1.28	0.72	13.3	0.1	11.75	0.46		-0.0968615		-0.0573332		-0.3842		-0.423728
AT3G20550	Encodes a nuclear localized FHA (forhkead) domain containing protein.Mutant plants have shortened roots, delayed flowering time, altered floral organ number, defective floral organs and reduced fertility.Ddl mutants also show reduced levels of pri-miRNAs as well as mature miRNAs suggesting involvement in biogenesis of miRNAs. DDL does not affect transcription of miRNAs directly but may act throug…	protein_coding	DAWDLE (DDL)	DAWDLE (DDL)	DDL				2.9301	RNA biosynthesis.RNA polymerase II-dependent transcription.miRNA biogenesis.DAWDLE pri-miRNA-DCL1 association factor		0.497508		0.90352		0.438857		0.932682													-2.81	0.49	-3.92	0.16	-1.61	0.14	-0.5	0.27		-0.358793		-0.520257		0.27711		0.438573
AT1G60200	RMB25 is an alternative splicing factor involved in mediation of abiotic stress response and ABA response. Its expression is modulated by a variety of stressors and it in turn appears to affect the ratio of splice variants of stress responsive genes such as HAB1.2/HAB1.1.	protein_coding	RNA-BINDING PROTEIN 25 (RBM25)	RNA-BINDING PROTEIN 25 (RBM25)	RBM25				1.29843	RNA processing.RNA splicing.U2-type-intron-specific major spliceosome.U1 small nuclear ribonucleoprotein particle (snRNP).RBM25 pre-mRNA splicing regulator		0.810302		0.663104	-0.62447	0.0249547	-0.682516	0.00420133			0.18	0.45	-0.07	0.44	-0.11	0.43	0.15	0.11			-2.77	0.05	-2.45	0.05	0.88	0.083	0.56	0.083	-1	-1		-0.670692		0.509014		0.179706
AT4G23640	Functions as a potassium transporter and is required for the establishment of root tip growth.	protein_coding	TINY ROOT HAIR 1 (TRH1)	TINY ROOT HAIR 1 (TRH1); (KUP4); (ATKT3)	TRH1				1.19414	Solute transport.carrier-mediated transport.APC superfamily.HAK/KUP/KT potassium cation transporter	-0.883207	3.39553e-05		0.0637252		0.850772	-0.546769	0.00544223													-2.7	0.31	-3.05	0.56	2.32	0.023	2.66	0.034		-0.118056		-0.222392		0.0276917		0.132028
AT4G00630	Encodes a K(+)/H(+) antiporter that modulates monovalent cation and pH homeostasis in plant chloroplasts or plastids.	protein_coding	K+ EFFLUX ANTIPORTER 2 (KEA2)	K+ EFFLUX ANTIPORTER 2 (KEA2)	KEA2				0.981182	Solute transport.carrier-mediated transport.CPA superfamily.CPA-2 family.proton:potassium cation antiporter (KEA-type)	-0.454956	0.0157053	0.431615	0.00952719		0.210449	-0.61473	1.06103e-05	-1.07432		0.11	0.22	0.34	0.00011	0.22	0.028	-0.02	0.79			-2.62	0.87	2.44	0.2	4.9	0.58	-0.16	0.75		-0.351074	-1.03505	-1.03505		-0.357322		0.326651
AT5G23080	Interacts with TATA-box binding protein 2. Contains domains with strong similarity to G-patch and SWAP domains, characteristic of RNA binding and processing proteins. Colocalizes with the splicing regulator SRp34 to subnuclear particles. It is an important component of miRNA and siRNA biogenesis. Mutants display developmental defects, including reduced plant height, polycotyly, and reduced vascul…	protein_coding	TOUGH (TGH)	TOUGH (TGH)	TGH					RNA biosynthesis.RNA polymerase II-dependent transcription.miRNA biogenesis.DCL1-HYL1 miRNA biogenesis complex.TOUGH component		0.934364		0.338345		0.619657		0.0599919													-2.59	0.63	-1.22	0.86	1.85	1	0.48	0.35		-0.0943274		-0.421138		-0.143364		0.183446
AT4G24175	kinesin-like protein	protein_coding							0.820423	not assigned.not annotated		0.381975		0.547252		0.951109		0.684258	-1.1318												-2.55	0.083	-0.85	0.89	2.09	0.11	0.39	0.91						-0.757367		-0.0309319
AT1G57990	Member of a family of proteins related to PUP1, a purine transporter. May be involved in the transport of purine and purine derivatives such as cytokinins, across the plasma membrane.	protein_coding	PURINE PERMEASE 18 (PUP18)	PURINE PERMEASE 18 (PUP18);PURINE PERMEASE 18 (ATPUP18)	PUP18					Solute transport.carrier-mediated transport.DMT superfamily.PUP organic cation transporter	1.20737	8.69241e-12	-1.02132	8.31457e-08		0.101515	1.8569	6.0693e-28		3.63349											-2.51	0.12	-17.09	0.0081	2.87	0.37	17.45	0.13		0.280108		-0.430979		-0.37005		0.341037
AT3G19900	hypothetical protein	protein_coding								not assigned.not annotated		0.893072	-0.589053	0.0415406		0.505939		0.158835													-2.49	0.83	-2.9	1	2.02	0.83	2.43	1		0.578536		0.443607		-0.307509		-0.172579
AT2G45520	coiled-coil protein	protein_coding								not assigned.not annotated		0.760544		0.423204		0.513018		0.745584													-2.47	0.13	-2.8	0.05	-0.84	0.25	-0.51	0.25		-0.607683		-0.415037		-0.41177		-0.604415
AT2G42320	nucleolar protein gar2-like protein	protein_coding								not assigned.not annotated		0.231162		0.229509	0.439658	0.0422078	0.460345	0.00986683													-2.45	0.0067	-2.56	0.03	0.64	0.64	0.75	0.6		0.430144		-0.569856		-0.687117		0.312883
AT5G07350	RNA binding protein with nuclease activity essential for stress response. Involved in mechanisms acting on mRNAs entering the secretory pathway. Functionally redundant with TSN2.	protein_coding	TUDOR-SN PROTEIN 1 (TUDOR1)	TUDOR-SN PROTEIN 1 (TUDOR1);ARABIDOPSIS THALIANA TUDOR-SN PROTEIN 1 (AtTUDOR1);TUDOR-SN PROTEIN 1 (TSN1)	TUDOR1					RNA processing.messenger ribonucleoprotein particle (mRNP).stress granule.TSN ribonuclease	-0.608242	0.000545792	0.734361	9.0826e-06		0.0680727	-0.967807	1.64995e-10			-0.19	0.18	0.04	0.95	0.25	0.053	0.02	0.39			-2.44	0.17	-2.5	0.088	0.01	0.58	0.06	0.34		-0.331844	-1.14543	-1.14543		-0.500429		0.313158
AT5G16590	Leucine-rich repeat protein kinase family protein	protein_coding	(LRR1)	(LRR1);LEUCINE RICH REPEAT PROTEIN 1 (LRR1)	LRR1				1.55249	Protein modification.phosphorylation.TKL kinase superfamily.LRR-III kinase	-0.609113	0.00463215		0.206834		0.352751	-0.568401	0.00426127			0.06	0.54	0.31	0.063	0.13	0.38	-0.12	0.62			-2.43	0.0088	-2.21	0.0055	0.19	0.79	-0.03	0.93		0.0541074		-0.283393		-0.178803		0.158698
AT4G22285	Ubiquitin C-terminal hydrolases superfamily protein	protein_coding							1.10046	RNA processing.RNA splicing.U2-type-intron-specific major spliceosome.U4/U6 U5 small nuclear ribonucleoprotein particle (snRNP).USP39 snRNP-associated protein	-1.01798	0.00205341		0.111981		0.0772077	-0.874929	0.00101712													-2.4	0.42	-2.12	0.58	0.3	0.14	0.02	0.6
AT1G54080	oligouridylate-binding protein 1A	protein_coding	OLIGOURIDYLATE-BINDING PROTEIN 1A (UBP1A)	OLIGOURIDYLATE-BINDING PROTEIN 1A (UBP1A)	UBP1A				1.54651	not assigned.annotated		0.374841		0.945796		0.442761	-0.315051	0.0211807													-2.4	0.15	-2.06	0.36	0.01	0.86	-0.32	0.6		-0.31366		-0.103093		0.201634		-0.00893312
AT5G24460	RING-H2 zinc finger protein	protein_coding							1.07128	not assigned.not annotated		0.579705		0.0880484		0.337676		0.874675													-2.4	0.00017	-2.36	0.00015	0.13	0.15	0.1	0.19		0.496426		-0.173149		-0.277718		0.391856
AT5G10540	Zincin-like metalloproteases family protein	protein_coding	THIMET METALLOENDOPEPTIDASE 2 (TOP2)	THIMET METALLOENDOPEPTIDASE 2 (TOP2)	TOP2					Protein degradation.peptidase families.metallopeptidase activities.M3 protease		0.163915		0.163244		0.902391		0.918929			0	0.89	-0.15	0.15	-0.19	0.063	-0.04	0.66			-2.37	0.42	-2.13	0.58	-3.31	0.36	-3.55	0.35		-0.352516		-0.70044		-0.0524674		0.295456
AT1G80490	TOPLESS-related 1	protein_coding	TOPLESS-RELATED 1 (TPR1)	TOPLESS-RELATED 1 (TPR1)	TPR1					RNA biosynthesis.transcriptional repression.TPL/TPR transcriptional co-repressor		0.399133		0.204018		0.713143		0.41672													-2.37	0.11	-1.76	0.36	-0.03	0.86	-0.64	0.46		-0.202817		-0.843274		-0.158065		0.482393
AT4G35890	Encodes a cytoplasmic LAM domain containing protein that is involved in leaf senescence. The mRNA is cell-to-cell mobile.	protein_coding	LA RELATED PROTEIN 1C (LARP1C)	LA RELATED PROTEIN 1C (LARP1C); (ATLARP1C)	LARP1C				2.07873	not assigned.annotated	-0.69615	0.0011651		0.975396		0.601709	-0.878002	2.07294e-07			-0.44	0.83	-0.12	0.83	0.33	0.56	0.01	1			-2.35	0.0056	-1.74	0.39	0.91	0.021	0.31	0.65		-0.105795		-0.153623		0.113063		0.160891
AT4G03080	BRI1 suppressor 1 (BSU1)-like 1	protein_coding	BRI1 SUPPRESSOR 1 (BSU1)-LIKE 1 (BSL1)	BRI1 SUPPRESSOR 1 (BSU1)-LIKE 1 (BSL1)	BSL1				1.88506	Protein modification.dephosphorylation.serine/threonine protein phosphatase superfamily.PPP Fe-Zn-dependent phosphatase families.PPKL phosphatase		0.433709		0.869206		0.0755083		0.583127			0.31	0.0064	0.45	0.0078	-0.17	0.1	-0.31	0.08			-2.34	0.015	-2	0.032	0.61	0.79	0.27	0.76		0.285091		-0.340229		-0.309544		0.315776
AT4G22320	golgin family A protein	protein_coding							2.86158	not assigned.not annotated		0.344827		0.251627		0.406776		0.125654													-2.33	0.52	-1.79	0.72	1.14	0.36	0.61	0.92				-0.192645				-0.308122
AT4G34860	Plant neutral invertase family protein	protein_coding	ALKALINE/NEUTRAL INVERTASE B (A/N-InvB)	ALKALINE/NEUTRAL INVERTASE B (A/N-InvB)	A/N-InvB					not assigned.annotated		0.236258		0.426248		0.0807665	0.740081	0.00694752		2.76391											-2.32	0.085	-1.19	0.7	2.7	0.0047	1.58	0.064		-0.192645		-0.966053		-0.798793		-0.0253853
AT1G50570	Calcium-dependent lipid-binding (CaLB domain) family protein	protein_coding							1.98231	not assigned.not annotated		0.180386		0.398431		0.583861		0.163079			-0.09	0.53	0.03	1	0.05	0.79	-0.07	0.13			-2.32	0.45	-3.48	0.12	-0.54	0.7	0.63	0.56		0.191426		-0.0905123		-0.101671		0.180267
AT4G32610	copper ion binding protein	protein_coding							1.80931	not assigned.not annotated		0.646901		0.835256		0.459561		0.163638													-2.32	0.043	-1.77	0.2	-0.25	0.25	-0.8	0.042		-0.298341		-0.674905		-0.0295443		0.347019
AT1G15750	Encodes a protein with several WD40 repeats at the C-terminus and predicted protein-protein interaction domains at the N-terminus. Together with the TOPLESS-RELATED PROTEINS (TPRs), it is thought to be involved in transcriptional repression of root-promoting genes in the top half of the embryo during the transition stage of embryogenesis. It can also interact with IAA12 through the EAR domain of …	protein_coding	TOPLESS (TPL)	TOPLESS (TPL);WUS-INTERACTING PROTEIN 1 (WSIP1)	TPL					RNA biosynthesis.transcriptional repression.TPL/TPR transcriptional co-repressor		0.137042		0.387372		0.454372		0.769737			0.03	0.82	0.12	0.99	0.11	0.76	0.02	0.58			-2.32	0	-1.96	0.06	0.64	0.013	0.28	0.98		-0.169925		-0.561116		0.0443941		0.435585
AT3G06670	SMEK1 forms a catalytically active complex with PP4 proteins. The complex has been shown to target and dephosphorylate HYL1 which in turn promotes miRNA biogenesis. Mutants have pleiotrophic phenotypes and decreased production of miRNA. SMEK1 accumulation is responsive to ABA.	protein_coding	SUPPRESSOR OF MEK 1 (SMEK1)	SUPPRESSOR OF MEK 1 (SMEK1);PLATINUM SENSITIVE 2 LIKE (PSY2L)	SMEK1					Protein modification.dephosphorylation.serine/threonine protein phosphatase superfamily.PPP Fe-Zn-dependent phosphatase families.PP4 phosphatase complex.regulatory component (PSY2L)		0.346395		0.895177		0.588952		0.881274			-0.02	0.51	0.28	0.083	0.14	0.51	-0.16	0.25			-2.28	0.52	-1.74	0.86	0.2	0.27	-0.34	0.12		-0.0365259		-0.439285		0.0365259		0.439285
AT1G75100	Contains a J-domain at the C-terminus which is similar to the J-domain of auxilin, a clathrin-uncoating factor in cow, yeast and worm. Arabidopsis contains 6 other proteins similar to auxilin. Expressed in leaves and stems, but not in roots. Localized in the cytoplasm. Required for the chloroplast accumulation response, but not for the avoidance response. No molecular function known.	protein_coding	J-DOMAIN PROTEIN REQUIRED FOR CHLOROPLAST ACCUMULATION RESPONSE 1 (JAC1)	J-DOMAIN PROTEIN REQUIRED FOR CHLOROPLAST ACCUMULATION RESPONSE 1 (JAC1);AUXILIN-LIKE6 (AUXILIN-LIKE6)	JAC1					Vesicle trafficking.clathrin coated vesicle (CCV) machinery.CCV accessory factors.AUL clathrin uncoating protein		0.897451	-0.757692	1.5485e-06	-0.639881	9.8576e-05		0.440238													-2.28	0.51	-22.07	0.13	2.03	0.56	21.82	0.25		0.255257		-0.516791		-0.194503		0.577545
AT3G17750	Encodes a member of a plant-specific subgroup in the DYRK (dual-specificity tyrosine phosphorylation-regulated kinase) family.	protein_coding	PLANT-SPECIFIC DUAL-SPECIFICITY TYROSINE PHOSPHORYLATION-REGULATED KINASE 1 (DYRKP-1)	PLANT-SPECIFIC DUAL-SPECIFICITY TYROSINE PHOSPHORYLATION-REGULATED KINASE 1 (DYRKP-1)	DYRKP-1				0.401639	Protein modification.phosphorylation.CMGC kinase superfamily.DYRK kinase		0.92243		0.271044		0.592968	-0.504043	0.0136202													-2.28	0.2	-1.11	0.58	0.71	0.068	-0.46	0.46		0.330645		-0.584963		-0.215168		0.70044
AT3G18390	CRS1 / YhbY (CRM) domain-containing protein	protein_coding	EMBRYO DEFECTIVE 1865 (EMB1865)	EMBRYO DEFECTIVE 1865 (EMB1865)	EMB1865				0.84188	not assigned.annotated		0.663058		0.537727		0.944636		0.116137		-1.04272	0	0.56	0.33	0.00042	0.34	0.0015	0.01	0.49			-2.24	0.5	-0.24	0.56	3.53	0.02	1.52	0.16		0.0695409		-0.695994		-0.375968		0.389567
AT1G61690	phosphoinositide binding protein	protein_coding							4.98639	not assigned.not annotated		0.696514		0.519719		0.990581		0.875689													-2.23	0.01	-2.39	0.0062	-0.35	0.2	-0.19	0.17		0.111893		-0.668794		-0.407878		0.372809
AT4G12790	P-loop containing nucleoside triphosphate hydrolases superfamily protein	protein_coding							3.08701	not assigned.annotated		0.723773		0.721117		0.844137		0.755866													-2.22	0.078	-2.58	0.045	0.16	0.58	0.52	0.17		-0.107641		-0.642678		-0.316857		0.21818
AT2G30710	Ypt/Rab-GAP domain of gyp1p superfamily protein	protein_coding								Vesicle trafficking.regulation of membrane tethering and fusion.RAB-GTPase-activating protein (RAB-GAP)		0.926336		0.340386		0.178033		0.817385													-2.19	0.0039	-1.9	0.018	-0.06	1	-0.35	0.17		-0.152851		-0.352789		-0.24952		-0.049582
AT3G28180	encodes a gene similar to cellulose synthase The mRNA is cell-to-cell mobile.	protein_coding	CELLULOSE-SYNTHASE-LIKE C4 (CSLC04)	CELLULOSE-SYNTHASE-LIKE C4 (ATCSLC04); (CSLC04);CELLULOSE-SYNTHASE-LIKE C4 (CSLC04);CELLULOSE-SYNTHASE LIKE C4 (CSLC4); (ATCSLC4)	CSLC04				6.40202	Cell wall.hemicellulose.xyloglucan.synthesis.CSLC-type 1,4-beta-glucan synthase		0.770048	-0.520881	0.0467982		0.0755083		0.666914													-2.18	0.75	-1.97	0.86	21.19	0.2	20.98	0.46		-0.0403577		0.0295443		0.332124		0.262222
AT4G35320	hypothetical protein	protein_coding								not assigned.not annotated		0.494138	-0.690849	0.0421986		0.360827	0.61785	0.0449803													-2.17	0.83	15.43	0.25	24.27	0.28	6.67	0.56		-0.0485802		0.285157		0.070703		-0.263034
AT1G34220	Regulator of Vps4 activity in the MVB pathway protein	protein_coding	IST1-LIKE 1 (ISTL1)	IST1-LIKE 1 (ISTL1)	ISTL1				0.938232	not assigned.not annotated		0.105849		0.912517		0.712159		0.307677													-2.15	0.52	-3.19	0.41	5.79	0.028	6.83	0.009		0.237692		-0.496234		-0.174498		0.559427
AT5G37710	alpha/beta-Hydrolases superfamily protein	protein_coding							1.57119	not assigned.not annotated		0.815861		0.0695334		0.937043		0.171813	1.39691												-2.15	0.69	-1.02	0.58	0.52	0.58	-0.6	0.25
AT3G26400	member of eIF4B - eukaryotic initiation factor 4B The mRNA is cell-to-cell mobile.	protein_coding	EUKARYOTIC TRANSLATION INITIATION FACTOR 4B1 (EIF4B1)	EUKARYOTIC TRANSLATION INITIATION FACTOR 4B1 (EIF4B1)	EIF4B1				0.819951	Protein biosynthesis.translation initiation.mRNA loading.eIF4B mRNA unwinding factor	-0.640051	0.0171322		0.880065		0.827921	-0.797325	7.6554e-05			0.15	0.89	0.39	0.39	0.16	0.4	-0.08	0.86			-2.13	0.0084	-0.96	0.63	0.28	0.91	-0.89	0.0039		0.211504		-0.327362		-0.122128		0.416738
AT3G53530	Chloroplast-targeted copper chaperone protein	protein_coding	SODIUM POTASSIUM ROOT DEFECTIVE 3 (NAKR3)	SODIUM POTASSIUM ROOT DEFECTIVE 3 (NAKR3)	NAKR3					not assigned.annotated		NA		NA		NA		NA													-2.12	0.51	-1.97	0.51	3.1	0.083	2.95	0.083
AT5G57160	Encodes the Arabidopsis orthologue of the yeast and mammalian DNA ligase IV. Involved in the repair of DNA damage but, unlike in yeast, not required for T-DNA integration. Interacts with the Arabidopsis homologue of XRCC4.	protein_coding	(ATLIG4)	DNA LIGASE IV (LIG4); (ATLIG4)	ATLIG4				1.97266	DNA damage response.DNA repair mechanisms.nonhomologous end-joining repair (NHEJ).LIG4-XRCC4 ligase complex.LIG4 DNA ligase component		0.612195	0.577316	0.0404015		0.580306		0.654176													-2.11	0.15	-6.03	0.011	0.18	0.72	4.1	0.46								0.860142
AT5G11040	Encodes a tethering factor required for cell plate biogenesis.	protein_coding	(TRS120)	(TRS120); (AtTRS120);VASCULAR NETWORK DEFECTIVE 4 (VAN4); (TRAPPC9)	TRS120					Vesicle trafficking.target membrane tethering.TRAPP (Trafficking-Protein-Particle) complexes.TRAPP-II complex-specific components.TRS120/VAN4 component		0.718769		0.0869294		0.381107	-0.720746	2.03358e-05													-2.11	0.2	-2.03	0.58	0.86	0.72	0.79	0.92		-0.592342		-0.464963		0.461448		0.334069
AT5G64430	Octicosapeptide/Phox/Bem1p family protein	protein_coding								not assigned.not annotated	1.17692	9.59916e-08		0.603102		0.189251	0.651607	0.00128837		1.24604	-0.36	0.42	0.24	0.64	0.41	0.43	-0.19	0.88			-2.1	0.64	-2.08	0.62	-0.39	0.12	-0.42	0.12		-0.314109		-0.404621		0.23763		0.328142
AT3G12640	RNA binding (RRM/RBD/RNP motifs) family protein	protein_coding							1.13625	not assigned.not annotated		0.31299		0.820533		0.614374		0.407664													-2.1	0.15	-2.23	0.2	0.6	0.47	0.72	0.35		-0.596644		-0.650416		-0.197681		-0.143909
AT4G35785	RNA-binding (RRM/RBD/RNP motifs) family protein	protein_coding							0.8238	not assigned.annotated		0.813764		0.697696		0.634544		0.645068													-2.1	0.51	-1.21	0.49	0.33	0.56	-0.57	0.064		-0.243454		-0.602996		0.0314782		0.391021
AT5G65660	hydroxyproline-rich glycoprotein family protein	protein_coding							1.89509	not assigned.annotated		0.268338	-0.839224	0.00391011		0.142907		0.842175	1.40956	0.561784											-2.09	0.055	-1.88	0.068	0.37	1	0.16	0.75		0.114171		0.183066		0.597972		0.529076
AT5G06530	Encodes ABCG22, an ABC transporter gene. Mutation results in increased water transpiration and drought susceptibility.	protein_coding	ATP-BINDING CASSETTE G22 (ABCG22)	ARABIDOPSIS THALIANA ATP-BINDING CASSETTE G22 (AtABCG22);ATP-BINDING CASSETTE G22 (ABCG22)	ABCG22				0.64158	Solute transport.primary active transport.ABC superfamily.ABC2 family.subfamily ABCG transporter		0.405181		0.442882		0.226812		0.648956	1.10637	1.71061											-2.09	0.45	-0.83	0.43	1.08	0.7	-0.18	0.3		0.0987782		-0.648835		-0.235714		0.511899
AT2G20330	Transducin/WD40 repeat-like superfamily protein	protein_coding								not assigned.not annotated		0.166268		0.456027		0.337185		0.675934													-2.08	0.094	-2.08	0.32	0.97	0.025	0.97	0.11		-0.419376		-0.509014		0.0925661		0.182203
AT4G11660	member of Heat Stress Transcription Factor (Hsf) family	protein_coding	(AT-HSFB2B)	(AT-HSFB2B);HEAT SHOCK TRANSCRIPTION FACTOR B2B (HSFB2B); (HSF7)	AT-HSFB2B					RNA biosynthesis.transcriptional activation.HSF (heat shock) transcription factor		0.669247		0.906894		0.955516		0.630038													-2.08	0.83	19.26	0.28	23.36	0.083	2.02	0.56		0.667425		-0.180572		-0.584963		0.263034
AT5G59210	myosin heavy chain-like protein	protein_coding								not assigned.not annotated		0.0871386		0.590815		0.989087		0.247719													-2.08	0.83	0.36	0.51	-0.24	0.56	-2.67	0.083		-0.30895		-0.660794		-0.0162406		0.335603
AT5G64160	plant/protein	protein_coding								not assigned.not annotated		0.534658		0.972252		0.805187		0.746685													-2.07	0.34	-1.51	0.86	0.62	0.068	0.06	0.92		-0.139163		-0.0166787		-0.154034		-0.276518
AT4G27870	Vacuolar iron transporter (VIT) family protein	protein_coding								Solute transport.carrier-mediated transport.VIT family.metal cation transporter (MEB-type)		0.84771		0.410721		0.836318		0.811642			0.04	0.49	0.18	0.03	0.24	0.042	0.11	0.44			-2.07	0.2	-1.45	0.43	0.65	0.5	0.03	0.82		-0.139403		-0.520007		-0.16601		0.214594
AT5G04510	Encodes 3-phosphoinositide-dependent protein kinase that contains pleckstrin homology domain and binds 3-phosphoinositides. It activates the protein kinase AGC2-1 in a phosphatidic acid dependent manner. Phosphorylates S6K1. Interacts with PID, and transphosphorylation by PDK1 increases PID autophosphorylation. The mRNA is cell-to-cell mobile.	protein_coding	3'-PHOSPHOINOSITIDE-DEPENDENT PROTEIN KINASE 1 (PDK1)	(ATPDK1);3'-PHOSPHOINOSITIDE-DEPENDENT PROTEIN KINASE 1 (PDK1)	PDK1				1.13668	Protein modification.phosphorylation.AGC kinase superfamily.PDK kinase		0.750852		0.26975		0.932035		0.390017													-2.07	0.75	-0.84	0.31	1.11	0.089	-0.12	0.76		-0.345497		-0.584963		-0.0256866		0.213779
AT4G08350	global transcription factor group A2	protein_coding	GLOBAL TRANSCRIPTION FACTOR GROUP A2 (GTA2)	(GTA02); (SPT5-2);GLOBAL TRANSCRIPTION FACTOR GROUP A2 (GTA2)	GTA2				2.15703	RNA biosynthesis.RNA polymerase II-dependent transcription.SPT4/5 transcription elongation factor complex.SPT5 component		0.152697	0.491853	0.0262556		0.859942		0.407529													-2.06	0.15	-0.01	0.96	2.26	0.025	0.21	0.96		0	-1.12338	-1.12338		-0.345775		0.777608
AT5G18500	Protein kinase superfamily protein	protein_coding								Protein modification.phosphorylation.TKL kinase superfamily.RLCK-V kinase		0.717143		0.515278		0.728435		0.451313													-2.05	0.28	-21.21	0.13	1.94	1	21.09	0.083		-0.192645		-0.395138		-0.202493		0
AT3G01540	RNA HELICASE DRH1	protein_coding	DEAD BOX RNA HELICASE 1 (DRH1)	DEAD BOX RNA HELICASE 1 (DRH1);NVOLVED IN RRNA PROCESSING 6 (IRP6);RNA HELICASE 14 (RH14);ARABIDOPSIS THALIANA DEAD BOX RNA HELICASE 1 (ATDRH1)	DRH1					not assigned.annotated	-0.643739	5.89443e-05		0.624867		0.151301	-0.823648	7.38941e-09													-2.04	0.42	-1.48	0.86	0.52	0.1	-0.05	0.46		-0.925999		0		0.378512		-0.547488
AT5G10470	Kinesin that binds cyclin-dependent kinase CDKA;1 as homodimer or as heterodimer with KCA2. Demarcates the division site in plant cells.	protein_coding	KINESIN LIKE PROTEIN FOR ACTIN BASED CHLOROPLAST MOVEMENT 1 (KAC1)	KINESIN LIKE PROTEIN FOR ACTIN BASED CHLOROPLAST MOVEMENT 1 (KAC1)	KAC1					Cytoskeleton.cp-actin-dependent plastid movement.KAC accessory motility factor		0.653695		0.670219		0.0761599	-0.309442	0.0341435			-0.05	0.48	-0.1	0.27	-0.03	0.59	0.02	0.84			-2.03	0.27	-3.15	0.0081	-1.19	0.051	-0.07	0.83		0.0909085		-0.876425		-0.54157		0.425764
AT5G19820	Encodes an importin that transports HYL1, a component of the microprocessor, from the cytoplasm to the nucleus to constitute functional microprocessor, thereby affecting miRNA processing. Knockdown amiR mutants significantly reduced nuclear portion of HYL1 protein and correspondingly compromised the pri-miRNA processing in the nucleus.	protein_coding	(KARYOPHERIN ENABLING THE TRANSPORT OF THE CYTOPLASMIC HYL1 (KETCH1)	EMBRYO DEFECTIVE 2734 (emb2734);(KARYOPHERIN ENABLING THE TRANSPORT OF THE CYTOPLASMIC HYL1 (KETCH1)	KARYOPHERIN ENABLING THE TRANSPORT OF THE CYTOPLASMIC HYL1 (KETCH1				2.86483	Protein translocation.nucleus.nucleocytoplasmic transport.karyopherin beta transport receptors.IMB3 import karyopherin	-0.967093	9.26889e-13	0.400381	0.00644308		0.995424	-1.36528	2.30222e-29	-1.11303		-0.08	0.072	-0.15	0.016	-0.05	0.55	0.02	0.87			-2.01	0.2	-1.76	0.2	0.03	0.86	-0.22	0.92		-0.13245		-0.662965		-0.251979		0.278535
AT2G15860	BAT2 domain protein	protein_coding								not assigned.not annotated		0.786967		0.343321		0.359766		0.687825			-0.02	0.63	0.09	0.17	0.07	0.39	-0.04	0.47			-2.01	0.2	-1.6	0.47	0.11	0.86	-0.29	0.35		0.391321		-0.750972		-0.654356		0.487938
AT4G25890	60S acidic ribosomal protein family	protein_coding				P3a				Protein biosynthesis.cytosolic ribosome.large subunit (LSU).LSU proteome component.RPP3 component	-1.29263	1.68519e-07	-0.56482	0.0280698		0.941254	-0.687058	0.00332575	-1.30381	-1.12395											-2	0.0015	-2.73	0	-0.34	0.37	0.39	0.39		0.603483		0.632629		-0.376305		-0.405451
AT1G76810	eukaryotic translation initiation factor 2 (eIF-2) family protein	protein_coding	(EIF5B1)	(EIF5B1)	EIF5B1					Protein biosynthesis.translation initiation.eIF5B Met-tRNA positioning factor	-0.622387	0.00181067	0.61965	0.00141528		0.850682	-1.17194	3.86439e-12			-0.08	0.36	0.17	0.0089	0.19	0.043	-0.06	0.026			-2	0.00039	-0.95	0.57	1.22	0.0001	0.17	1		-0.164387	-1.26748	-1.26748		-0.482942		0.620152
AT5G21010	Encodes a member of the MATH-BTB domain proteins (BPMs) that directly interact with and target for proteasomal degradation the class I homeobox-leucine zipper (HD-ZIP) transcription factor ATHB6. Known members include AT5G19000 (BPM1), AT3G06190 (BPM2), AT2G39760 (BPM3), AT3G03740 (BPM4), AT5G21010 (BPM5) and AT3G43700 (BPM6).	protein_coding	BTB-POZ AND MATH DOMAIN 5 (BPM5)	BTB-POZ AND MATH DOMAIN 5 (BPM5);BTB-POZ AND MATH DOMAIN 5 (ATBPM5)	BPM5				1.53951	not assigned.annotated		0.306556		0.811491		0.901067		0.249798													-1.99	0.83	-0.36	0.83	2.88	0.083	1.26	0.083		0.30849		-0.829014		-0.745995		0.391509
AT3G05070	Cwf18 pre-mRNA splicing factor	protein_coding								not assigned.not annotated	-0.715827	0.032549		0.626331		0.496448		0.489552			0.05	0.4	0.33	0.56	-0.15	0.56	-0.43	0.3			-1.98	0.15	-1.8	0.47	0.08	1	-0.11	0.17		0.270648		0.251539		-0.716546		-0.697437
AT5G05800	Myb/SANT-like DNA-binding domain protein	protein_coding							0.971256	not assigned.annotated		0.949931		0.66999		0.789329		0.992383													-1.98	0.75	-0.56	0.36	1.29	0.72	-0.12	0.35		0.499102		-0.943416		-0.762136		0.680382
AT5G40390	Encodes a protein which might be involved in the formation of verbascose. A T-DNA insertion mutant was shown to have a decreased amount of verbascose (as well as mannitol) whereas the levels of raffinose and stachyose remained unchanged.	protein_coding	SEED IMBIBITION 1-LIKE (SIP1)	RAFFINOSE SYNTHASE 5 (RS5);SEED IMBIBITION 1-LIKE (SIP1)	SIP1				1.53693	Carbohydrate metabolism.raffinose family oligosaccharide biosynthesis.raffinose synthase		0.359971	0.561363	0.0143537		0.708165	-0.693196	0.000674403	-1.10089		-0.05	0.91	-0.32	0.074	-0.38	0.0056	-0.12	0.31			-1.95	0.1	-1.25	0.31	0.33	0.92	-0.37	0.49		-0.169925		-0.531325		-0.0500407		0.311359
AT4G15410	serine/threonine protein phosphatase 2A 55 kDa regulatory subunit B prime gamma	protein_coding	SERINE/THREONINE PROTEIN PHOSPHATASE 2A 55 KDA REGULATORY SUBUNIT B PRIME GAMMA (PUX5)	SERINE/THREONINE PROTEIN PHOSPHATASE 2A 55 KDA REGULATORY SUBUNIT B PRIME GAMMA (PUX5)	PUX5				0.349809	not assigned.annotated		0.568976		0.319467		0.735304		0.878117			0.18	0.63	-0.01	0.22	0.09	0.75	0.27	0.29			-1.95	0.0079	-2.05	0.0024	-0.37	0.47	-0.27	0.94		0.266515		0.476438		0.379848		0.169925
AT4G24680	Encodes MOS1 (MODIFIER OF snc1). MOS1 contains a BAT2 domain that is conserved in plants and animals. MOS1 associates with the promoter of SNC1 and regulates its expression.	protein_coding	MODIFIER OF SNC1 (MOS1)	MODIFIER OF SNC1 (MOS1)	MOS1				3.38272	not assigned.annotated		0.445805		0.229665		0.773396	-0.536711	0.00129961			0.12	0.51	0.33	0.02	0.19	0.14	-0.02	0.88			-1.94	0.45	-0.16	0.92	1.89	0.27	0.11	0.35		-0.192645		-0.678072		-0.0297473		0.455679
AT3G50370	hypothetical protein	protein_coding								not assigned.not annotated	-0.469435	0.008397		0.936356	-0.4563	0.0147058	-0.902062	1.52633e-09													-1.93	0.057	-1.29	0.36	0.56	0.32	-0.09	0.94		-0.455679		-0.630766		0.192645		0.367732
AT1G70830	MLP-like protein 28	protein_coding	MLP-LIKE PROTEIN 28 (MLP28)	MLP-LIKE PROTEIN 28 (MLP28)	MLP28				0.151815	not assigned.annotated		0.455489	0.695131	0.000100352		0.0519243		0.68483		-2.08402	-0.15	0.1	0.17	0.038	0.22	0.016	-0.1	0.063			-1.92	0.025	-3.02	0.36	0.13	0.86	1.23	0.92		-0.242857		-0.595158		-0.152003		0.200299
AT1G24764	Member of the MAP70 protein family.	protein_coding	MICROTUBULE-ASSOCIATED PROTEINS 70-2 (MAP70-2)	MICROTUBULE-ASSOCIATED PROTEINS 70-2 (ATMAP70-2);MICROTUBULE-ASSOCIATED PROTEINS 70-2 (MAP70-2)	MAP70-2				2.39813	not assigned.annotated		0.723327	0.607925	0.0208439		0.832479		0.158889													-1.88	0.75	-1.87	0.86	-0.15	0.27	-0.16	0.35		0.386183		-0.727474		-0.85457		0.259087
AT1G80350	encodes a p60 katanin protein that is expressed throughout the plant. Required for the specification of cell fates from early in development (in the meristem) through differentiation and for normal postmitotic organization of cortical microtubules into transverse arrays in root epidermis cells. Mutants display cytoskeletal defects.	protein_coding	ECTOPIC ROOT HAIR 3 (ERH3)	ECTOPIC ROOT HAIR 3 (ERH3); (AAA1);FRAGILE FIBER 2 (FRA2); (LUE1); (FRC4);KATANIN 1 (KTN1);FURCA2 (FRC2);BOTERO 1 (BOT1);FAT ROOT (FTR); (ATKTN1)	ERH3					Cell cycle.cytokinesis.phragmoplast disassembly.Katanin ATP-dependent microtubule severing complex.catalytic component		0.908391		0.419106		0.807754		0.775557													-1.88	0.094	-2.06	0.03	0.02	1	0.2	0.29		-0.0450879		-0.63005		-0.493464		0.0914984
AT1G76880	DF1 is a putative transcription factor required for the synthesis of seed mucilage polysaccharides. The df1 seeds produce almost 50% less mucilage than wild-type, but show less severe defects than the myb5 and ttg2 mutants.	protein_coding	(DF1)	(DF1)	DF1				5.83429	RNA biosynthesis.transcriptional activation.Trihelix transcription factor																					-1.88	0.0017	-1.75	0.19	1.28	0.00053	1.15	0.074		-0.339486		-0.632268		-0.0448542		0.247928
AT4G17620	Mediates the connection between RNA turnover and retrograde chloroplast-to-nucleus signaling.	protein_coding	DXO PROTEIN 1 (DXO1)	DXO PROTEIN 1 (DXO1)	DXO1					RNA biosynthesis.RNA polymerase II-dependent transcription.transcription termination.decapping nuclease (RAI1)		0.307818		0.233224		0.924991		0.931367													-1.88	0.34	-2.03	0.2	0.05	0.47	0.2	0.12		0.113657		-0.843274		-0.576789		0.380143
AT3G54620	bZIP transcription factor-like protein mRNA	protein_coding	BASIC LEUCINE ZIPPER 25 (BZIP25)	BASIC LEUCINE ZIPPER O2 HOMOLOG 4 (BZO2H4);ARABIDOPSIS THALIANA BASIC LEUCINE ZIPPER 25 (AtbZIP25);BASIC LEUCINE ZIPPER 25 (BZIP25)	BZIP25				0.20111	RNA biosynthesis.transcriptional activation.bZIP superfamily.bZIP9/10/25 transcription factor		0.556208		0.892361		0.954297		0.525245		0.00769443											-1.88	0.13	-1.45	0.22	0.59	0.98	0.16	0.55		0.241008		-0.137504		-0.0565835		0.321928
AT3G15840	Encodes a chloroplast-targeted protein localized in the stroma that is a novel component essential for NDH-mediated non-photochemical reduction of the plastoquinone pool in chlororespiratory electron transport.	protein_coding	POST-ILLUMINATION CHLOROPHYLL FLUORESCENCE INCREASE (PIFI)	POST-ILLUMINATION CHLOROPHYLL FLUORESCENCE INCREASE (PIFI)	PIFI				1.41357	not assigned.not annotated	0.764682	0.00646207	-0.648033	0.0291627	-0.629679	0.0336468	0.783036	0.00266683													-1.84	0.15	-1.41	0.045	0.74	0.86	0.31	0.35		-0.0465426		-0.380345		-0.0702711		0.263531
AT1G78880	Plasma membrane-localized proteins that negatively regulate cellulose synthesis by inhibiting the exocytosis of CESAs.	protein_coding	(SHOU4)	(SHOU4)	SHOU4				1.55575	not assigned.annotated		0.8556		0.271028		0.892238		0.186828													-1.84	0.87	-0.57	0.36	0	0.58	-1.26	0.047		-0.126912		-0.360402		-0.025091		0.208399
AT3G56150	member of eIF3c - eukaryotic initiation factor 3c	protein_coding	EUKARYOTIC TRANSLATION INITIATION FACTOR 3C (EIF3C)	EUKARYOTIC TRANSLATION INITIATION FACTOR 3C (EIF3C); (ATEIF3C-1); (TIF3C1); (ATTIF3C1); (EIF3C-1)	EIF3C					Protein biosynthesis.translation initiation.pre-initiation complex (PIC).eIF3 mRNA-to-PIC binding complex.eIF3c component	-0.534038	0.0178548	0.571488	0.00974047		0.513981	-0.90065	3.43922e-06	-1.08992		-0.16	0.034	0.16	0.02	0.33	0.00067	0	0.5			-1.83	0.42	-1.53	0.58	0.05	0.86	-0.25	0.46		-0.0931094	-1	-1		-0.431157		0.475733
AT2G30620	winged-helix DNA-binding transcription factor family protein	protein_coding	HISTONE 1.2 (H1.2)	HISTONE 1.2 (H1.2)	H1.2					Chromatin organisation.histones.H1 linker histone	0.429185	0.00671504		0.716299		0.363801	0.328194	0.0298866			0.12	0.36	0.21	0.56	0.09	0.85	-0.01	0.45			-1.82	0.51	-2.05	0.28	-0.13	0.56	0.1	1		-0.210499		-0.349661		-0.348426		-0.209263
AT1G78700	BES1/BZR1 homolog 4	protein_coding	BES1/BZR1 HOMOLOG 4 (BEH4)	BES1/BZR1 HOMOLOG 4 (BEH4)	BEH4					RNA biosynthesis.transcriptional activation.BZR transcription factor		0.704355		0.209142		0.805659		0.104263													-1.82	0.52	-0.28	0.58	-0.43	0.72	-1.97	0.17		0.0931094		0.302563		-0.053581		-0.263034
AT3G27530	This gene is predicted to encode a protein that functions as a Golgi apparatus structural component known as a golgin in mammals and yeast. A fluorescently-tagged version of GC6 co-localizes with Golgi markers, and this localization appears to be replicated using the C-terminal (225 aa) portion of the protein.	protein_coding	GOLGIN CANDIDATE 6 (GC6)	MAIGO 4 (MAG4);GOLGIN CANDIDATE 6 (GC6)	GC6				0.864116	Vesicle trafficking.target membrane tethering.Golgi membrane tethering factors.GC6-type golgin	0.467417	0.0125385	0.417459	0.0219151		0.692725		0.420768													-1.81	0.33	-0.17	0.33	0.85	0.76	-0.79	0.022		-0.215729	-1.14756	-1.14756		-0.332144		0.599684
AT2G22080	transmembrane protein	protein_coding								not assigned.not annotated		0.987001		0.712878		0.982123		0.652233													-1.81	0.025	-1.8	0.068	-0.03	0.72	-0.04	0.75		0.242857		0.201634		0.0201779		0.0614005
AT3G14100	RNA-binding (RRM/RBD/RNP motifs) family protein	protein_coding							0.467626	not assigned.annotated		0.84254		0.981053		0.777472		0.509597			-0.02	0.96	0.22	0.12	0.26	0.14	0.02	0.82			-1.81	0.0032	-1.44	0.056	0.44	0.06	0.07	0.45		-0.189825		-0.0813001		0.257388		0.148863
AT5G58140	Membrane-bound protein serine/threonine kinase that functions as blue light photoreceptor in redundancy with PHO1. Involved in stomatal opening, chloroplast movement and phototropism. Mediates blue light-induced growth enhancements. PHOT1 and PHOT2 mediate blue light-dependent activation of the plasma membrane H+-ATPase in guard cell protoplasts. PHOT2 possesses two LOV (LOV1 and LOV2, for light-…	protein_coding	PHOTOTROPIN 2 (PHOT2)	PHOTOTROPIN 2 (PHOT2); (ATPHOT2);NON PHOTOTROPIC HYPOCOTYL 1-LIKE (NPL1)	PHOT2					External stimuli response.light.UV-A/blue light.phototropin-mediated photoperception.phototropin photoreceptor	0.517842	3.09027e-06	-0.273331	0.0318303	-0.462738	5.86433e-05	0.328436	0.00370064			-0.01	0.87	-0.03	0.77	-0.03	0.62	-0.01	0.65			-1.8	0.26	-1.3	0.35	-0.3	0.29	-0.8	0.28		-0.0605415		-0.517399		-0.271302		0.185556
AT3G21670	Major facilitator superfamily protein	protein_coding	NRT1/ PTR FAMILY 6.4 (NPF6.4)	(ATNPF6.4);NRT1/ PTR FAMILY 6.4 (NPF6.4)	NPF6.4				1.85714	Solute transport.carrier-mediated transport.MFS superfamily.NRT1/PTR anion transporter		0.538653	-0.712547	0.000279616	-0.771199	8.12774e-05		0.674816													-1.79	0.11	-1.4	0.36	0.23	0.36	-0.16	0.46		0.0819416		-0.774933		-0.388726		0.468149
AT5G38640	NagB/RpiA/CoA transferase-like superfamily protein	protein_coding							1.75578	Protein biosynthesis.translation initiation.pre-initiation complex (PIC).eIF2B eIF2-GDP recycling complex.eIF2B-delta	-0.932722	0.00667483		0.215584		0.148482	-1.10452	5.6178e-05													-1.79	0.1	-1.3	0.068	0.49	0.43	0.01	0.49		-0.849975		0.417506		0.991067		-0.276413
AT4G32350	Regulator of Vps4 activity in the MVB pathway protein	protein_coding	IST1-LIKE 7 (ISTL7)	IST1-LIKE 7 (ISTL7)	ISTL7					not assigned.not annotated		0.716772		0.542524		0.487401		0.746505													-1.79	0.037	-0.84	1	0.78	0.018	-0.18	0.75		-0.173648		-0.669176		-0.0775366		0.417991
AT5G04430	Gene model AT5G04430.1 produces active protein. (BTS1S). Binds to ToMV genomic RNA and prevents viral multiplication.	protein_coding	BINDING TO TOMV RNA 1L (LONG FORM) (BTR1L)	BINDING TO TOMV RNA 1L (LONG FORM) (BTR1L);BINDING TO TOMV RNA 1 (BTR1)	LONG FORM				0.982864	not assigned.annotated	-0.959502	8.23298e-11		0.784752		0.454372	-0.852276	2.36797e-10			-0.3	0.0009	-0.06	0.72	0.08	0.23	-0.15	0.14			-1.78	0	-1.8	0	0.27	0.82	0.29	0.44		-0.0262315		-0.286621		-0.428334		-0.167945
AT2G23310	Encodes AtRER1C1, a Golgi membrane protein involved in returning the molecules that are exported from the endoplasmic reticulum (ER) to the Golgi apparatus back to the ER (a mechanism known as retrieval). There are two Arabidopsis homologues of AtRERC1: AtRER1A and AtRER1B.	protein_coding	(ATRER1C1)	(ATRER1C1)	ATRER1C1					not assigned.annotated	-0.749092	0.00378644		0.0513781		0.959057		0.360085													-1.77	0.83	-1.54	0.51	0.09	1	-0.13	1		-0.0122783		0.617203		0.227667		-0.401814
AT1G18800	Double nrp1-1 nrp2-1 mutants show arrest of cell cycle progression at G2/M and disordered cellular organization occurred in root tips. Localize in the nucleus and can form homomeric and heteromeric protein complexes with NRP1. Bind histones Histone2A and Histone2B and associate with chromatin in vivo. Plant mutated in both NRP1 and NRP2 genes show hypersensitivity to genotoxic stresses including …	protein_coding	NAP1-RELATED PROTEIN 2 (NRP2)	NAP1-RELATED PROTEIN 2 (NRP2)	NRP2				0.710227	not assigned.annotated	-1.08695	0.000404678		0.444611	0.763595	0.0244312	-0.604088	0.0281093	-1.28384												-1.77	0.05	-1.48	0.083	0.18	0.51	-0.11	0.56		-0.308549		-0.412054		-0.349942		-0.246438
AT1G26630	Eukaryotic translation initiation factor 5A-2. Involved in programmed cell death triggered as a response to pseudomonas syringae infection. Loss of function mutants are more resistant to infection. The mRNA is cell-to-cell mobile.	protein_coding	FUMONISIN B1-RESISTANT12 (FBR12)	FUMONISIN B1-RESISTANT12 (FBR12);EUKARYOTIC ELONGATION FACTOR 5A-2 (ELF5A-2);EUKARYOTIC ELONGATION FACTOR 5A-2 (ATELF5A-2)	FBR12				6.78493	Protein biosynthesis.translation elongation.eEF5(eIF5A) poly-P/G elongation factor		0.319191		0.0841243		0.571509		0.89308			0.03	0.21	0.2	0.011	0.32	0.00026	0.15	0.011			-1.75	0.63	-0.07	0.36	1.51	0.1	-0.16	0.46		0.147933		0.154034		-0.0434393		-0.0495395
AT4G25500	Encodes an arginine/serine-rich splicing factor. The transcript is alternatively spliced and is differentially expressed in different tissues (flowers, roots, stems, and leaves) examined. Barta et al (2010) have proposed a nomenclature for Serine/Arginine-Rich Protein Splicing Factors (SR proteins): Plant Cell. 2010, 22:2926. RS40 binds to HYL1 and co-localizes to the nuclear dicing body. Along w…	protein_coding	ARGININE/SERINE-RICH SPLICING FACTOR 40 (RS40)	ARABIDOPSIS THALIANA ARGININE/SERINE-RICH SPLICING FACTOR 35 (ATRSP35); (ATRSP40);ARGININE/SERINE-RICH SPLICING FACTOR 40 (At-RS40);ARGININE/SERINE-RICH SPLICING FACTOR 35 (RSP35);ARGININE/SERINE-RICH SPLICING FACTOR 40 (RS40); (AT-SRP40)	RS40				1.6067	RNA processing.RNA splicing.spliceosome-associated non-snRNP factors.RS31/40/41 splicing factor		0.832664		0.309949		0.72472		0.153705													-1.75	0.043	0.08	0.14	1.65	0.058	-0.18	0.16		-0.132104		-0.391191		-0.134542		0.124545
AT3G57410	Encodes a protein with high homology to animal villin. VLN3 is a Ca2+-regulated villin involved in actin filament bundling.	protein_coding	VILLIN 3 (VLN3)	(ATVLN3);VILLIN 3 (VLN3)	VLN3					Cytoskeleton.microfilament network.actin polymerisation.villin actin-crosslinking factor		0.77567		0.963491		0.279882		0.0833498		1.02032	-0.18	0.11	-0.13	0.57	0.04	0.6	-0.02	0.034			-1.74	0.023	-1.89	0.0034	-0.58	0.0083	-0.43	0.033		-0.309855		-0.704993		-0.133751		0.261387
AT5G08180	Ribosomal protein L7Ae/L30e/S12e/Gadd45 family protein	protein_coding							2.04602	RNA processing.RNA splicing.U2-type-intron-specific major spliceosome.U4/U6 small nuclear ribonucleoprotein particle (snRNP).NHP2L1/SNU13 snRNP component	-1.19734	3.41437e-07		0.43465	0.745718	0.00457565	-0.680983	0.00104597	-1.46008		-0.12	0.39	0.2	0.06	0.24	0.097	-0.08	0.76			-1.73	0.34	-1.43	0.36	0.03	0.72	-0.26	0.25		-0.0598094		-0.300124		-0.496153		-0.255839
AT2G21600	Key player of retrieval of ER membrane proteins The mRNA is cell-to-cell mobile.	protein_coding	ENDOPLASMATIC RETICULUM RETRIEVAL PROTEIN 1B (RER1B)	ENDOPLASMATIC RETICULUM RETRIEVAL PROTEIN 1B (ATRER1B);ENDOPLASMATIC RETICULUM RETRIEVAL PROTEIN 1B (RER1B)	RER1B					not assigned.annotated		0.14977		0.229311		0.70908	0.537498	0.00485269													-1.73	1	-1.48	0.58	0.15	0.47	-0.1	0.6		0.388565		0.229868		-0.293408		-0.13471
AT1G20696	Encodes a protein belonging to the subgroup of HMGB (high mobility group B) proteins that have a distinctive DNA-binding motif, the HMG-box domain. The motif confers non-sequence specific interaction with linear DNA and structure-specific binding to distorted DNA sites. The HMGB proteins are involved in the assembly of nucleoprotein complexes. Can be phosphorylated by CK2alpha. The mRNA is cell-t…	protein_coding	HIGH MOBILITY GROUP B3 (HMGB3)	HIGH MOBILITY GROUP B3 (HMGB3); (NFD3); (NFD03)	HMGB3				1.59116	not assigned.annotated	0.395906	0.0238762		0.532395		0.986676	0.528491	0.000240597													-1.72	0.45	-1.48	0.71	0.44	0.5	0.2	0.91		-0.133267		-0.368645		-0.0593785		0.176
AT1G20670	DNA-binding bromodomain-containing protein	protein_coding							0	not assigned.not annotated		0.958503		0.435087		0.715155		0.829577													-1.71	0.69	-1.24	0.34	0.18	0.63	-0.29	0.91		0.438573		0.14439		0.027745		0.321928
AT4G33400	Vacuolar import/degradation, Vid27-related protein	protein_coding								not assigned.annotated		0.420898	0.690088	0.0162137		0.991293		0.17451													-1.71	0.15	-0.73	0.36	0.69	0.1	-0.29	0.46	-1.60805	-1.60805	-1.83432	-1.83432		0.195551		0.421827
AT3G49010	Encodes 60S ribosomal protein L13. Homolog of human breast basic conserved 1 (BBC1).	protein_coding	BREAST BASIC CONSERVED 1 (BBC1)	BREAST BASIC CONSERVED 1 (ATBBC1);40S RIBOSOMAL PROTEIN (RSU2);BREAST BASIC CONSERVED 1 (BBC1)	BBC1	eL13b				Protein biosynthesis.cytosolic ribosome.large subunit (LSU).LSU proteome component.RPL13 component	-1.40746	3.34506e-21		0.653708	0.436687	0.0192907	-1.07806	4.23882e-14		-1.38145	0.06	0.68	0.19	0.88	0.1	0.8	-0.03	0.88			-1.7	0.15	-0.29	0.65	1.68	0.054	0.28	0.3		-0.273761		0.00887815		-0.0437214		-0.32636
AT4G35980	hypothetical protein	protein_coding							1.19525	not assigned.not annotated		0.781619		0.54918		0.378004		0.112884													-1.69	0.17	-1.31	0.12	0.24	0.71	-0.14	0.91		-0.109973		0.801671		0.149143		-0.762501
AT4G11740	Isolated as a suppressor of a dominant mutant in the Ara4 gene that was expressed in yeast ypt1 mutant strains. A novel protein with a small region of similarity to coil-coiled domain of yeast VSP27 protein.	protein_coding	(SAY1)	(SAY1)	SAY1					not assigned.annotated	0.536887	0.0440741		0.334729		0.906878		0.479088													-1.68	0.028	-1.05	0.17	0.64	0.64	0.01	0.7		-0.223471		-0.930535		-0.305966		0.401098
AT5G47490	RGPR-like protein	protein_coding							0.905109	Vesicle trafficking.Coat protein II (COPII) coatomer machinery.Sec16 Sar1-GTPase-regulating protein		0.0537832		0.774529		0.439916		0.12635													-1.68	0.27	-1.52	0.25	2.5	0.04	2.33	0.013		-0.434937		-0.575115		0		0.140178
AT3G18480	This gene is predicted to encode a protein that functions as a Golgi apparatus structural component, known as a golgin in mammals and yeast. A fluorescently-tagged version of CASP co-localizes with Golgi markers, and this localization appears to require the C-terminal (565?689aa) portion of the protein. The protein is inserted into a membrane in a type II orientation.	protein_coding	CCAAT-DISPLACEMENT PROTEIN ALTERNATIVELY SPLICED PRODUCT (CASP)	CCAAT-DISPLACEMENT PROTEIN ALTERNATIVELY SPLICED PRODUCT (CASP);CCAAT-DISPLACEMENT PROTEIN ALTERNATIVELY SPLICED PRODUCT (AtCASP)	CASP				1.56225	Vesicle trafficking.target membrane tethering.Golgi membrane tethering factors.CASP-type golgin		0.689587		0.0554645		0.355821		0.900413													-1.68	0.63	-1.52	0.86	0.17	0.72	0.01	0.92		0.466021		-0.890122		-0.784063		0.572081
AT2G41740	Encodes a protein with high homology to animal villin.	protein_coding	VILLIN 2 (VLN2)	VILLIN 2 (VLN2); (ATVLN2)	VLN2					Cytoskeleton.microfilament network.actin polymerisation.villin actin-crosslinking factor		0.691368		0.143936		0.996014	-0.36454	0.0182419			-0.01	0.52	0.14	0.093	0.11	0.13	-0.04	0.33			-1.67	0.0009	-1.1	0.066	1.01	0.032	0.44	0.77		-0.18927		-0.822213		-0.41055		0.222392
AT1G67230	Encodes a nuclear coiled-coil protein related to the carrot peripheral nuclear protein NMCP1 that is involved in the determination of plant nuclear structure. Member of a small gene family in Arabidopsis containing 4 proteins (LNC1-4 or CRWN 1-4) with redundant functions in protection from oxidative damage, control of nuclear morphology and degradation of ABI5.	protein_coding	LITTLE NUCLEI1 (LINC1)	CROWDED NUCLEI 1 (CRWN1);LITTLE NUCLEI1 (LINC1);(JAPANESE FOR NUCLEUS) 2 (KAKU2); (ATLINC1)	LINC1				0.67158	Cytoskeleton.cytoskeleton-nucleoskeleton linking.nuclear lamina.CRWN lamin-like protein		0.122627		0.505352		0.302391		0.75004													-1.65	0.0026	-1.43	0.046	0.4	0.22	0.18	0.88		-0.16601	-1.03171	-1.03171		-0.415037		0.450661
AT1G64790	ILITHYIA (ILA) is a HEAT repeat protein involved in plant immunity. The gene is also involved in systemic acquired resistance induced by P. syringae expressing avrRps4. Loss-of-function mutants of ILA caused pleiotropic defects in the mutant plants. The mutant plants are smaller in size and the leaves are serrated and yellow to light green in color. Required for bacterium-triggered stomatal closu…	protein_coding	ILITHYIA (ILA)	ILITHYIA (ILA);NON-RESPONDING TO OXYLIPINS 7 (NOXY7)	ILA				1.35889	Protein biosynthesis.translation initiation.pre-initiation complex (PIC).eIF2 Met-tRNA binding factor complex.phosphorylation of eIF2-alpha.GCN1 kinase co-activator (ILITHYIA)	-0.713674	0.0044382	0.762751	0.00188601		0.564616	-1.26112	5.84993e-09	-1.09001		0.07	0.45	0.4	0	0.24	0.036	-0.08	0.15			-1.64	0.77	-1.33	0.95	0.79	0.056	0.48	0.45		-0.278976	-1.25987	-1.25987		-0.309955		0.670936
AT3G02220	small acidic-like protein	protein_coding							1.64602	not assigned.not annotated	-0.716089	0.0106813		0.985358		0.21437		0.250541													-1.63	0.055	-1.54	0.045	0.14	0.47	0.05	0.6		0.106128		-0.033423		-0.474215		-0.334664
AT5G58440	sorting nexin 2A	protein_coding	SORTING NEXIN 2A (SNX2a)	SORTING NEXIN 2A (SNX2a)	SNX2a					Vesicle trafficking.endomembrane trafficking.protein recycling.Retromer protein recycling complex.SNX2 component		0.164575		0.731381		0.519053		0.220988													-1.63	0.11	-1.33	0.72	-0.04	0.86	-0.34	0.028		0.0501858		-0.176323		-0.394631		-0.168123
AT5G54910	DEA(D/H)-box RNA helicase family protein	protein_coding							1.10106	not assigned.annotated	-1.43287	0.000113759		0.202636		0.355706	-1.42991	4.13106e-07	-1.67856												-1.62	0.037	-1.48	0.47	0.37	0.045	0.24	0.92				-0.711655				0.222392
AT2G25620	Encodes DBP1, a member of the DBP factors (DNA-binding protein phosphatases) featuring sequence-specific DNA-binding and protein phosphatase activity. DBP1 is involved in plant-potyvirus interactions. Loss-of-function of DBP1 renders resistance to potyviruses.	protein_coding	DNA-BINDING PROTEIN PHOSPHATASE 1 (DBP1)	DNA-BINDING PROTEIN PHOSPHATASE 1 (DBP1);DNA-BINDING PROTEIN PHOSPHATASE 1 (AtDBP1)	DBP1					RNA biosynthesis.transcriptional activation.DBP transcription factor	-1.59795	1.2184e-05		0.180332		0.129285	-1.36674	2.25379e-07	-1.59636												-1.61	0.83	-2.15	0.28	-1.26	0.083	-0.72	0.083				-0.874469				0.384664
AT3G15880	WUS-interacting protein 2	protein_coding	WUS-INTERACTING PROTEIN 2 (WSIP2)	WUS-INTERACTING PROTEIN 2 (WSIP2);TOPLESS-RELATED 4 (TPR4)	WSIP2					RNA biosynthesis.transcriptional repression.TPL/TPR transcriptional co-repressor		0.875196		0.64206		0.603792		0.28802													-1.61	0.26	-0.61	0.36	3.33	0.27	2.32	0.92		-0.32577		-0.773229		0.0473057		0.494765
AT1G47900	filament-like protein (DUF869)	protein_coding							1.04844	not assigned.annotated		0.176008	0.626748	0.00154783		0.451407		0.745675													-1.6	0.26	-1.19	0.58	0.26	0.27	-0.16	0.6		0.0359196		-0.894818		-0.438884		0.491853
AT1G68830	STN7 protein kinase; required for state transitions, phosphorylation of the major antenna complex (LHCII) between PSII and PSI, and light adaptation. STN7 is involved in state transitions.	protein_coding	STT7 HOMOLOG STN7 (STN7)	STT7 HOMOLOG STN7 (STN7)	STN7					Protein modification.phosphorylation.CMGC kinase superfamily.STN kinase	0.569371	0.0019392	-0.578016	0.00189569	-0.48035	0.012733	0.667038	6.36355e-05													-1.59	0.89	-2.02	0.56	-0.65	0.068	-0.22	0.73		-0.0972972		-0.616671		-0.223325		0.296049
AT1G12920	Encodes a eukaryotic release factor one homolog.	protein_coding	EUKARYOTIC RELEASE FACTOR 1-2 (ERF1-2)	EUKARYOTIC RELEASE FACTOR 1-2 (ERF1-2)	ERF1-2					Protein biosynthesis.translation termination.eRF1 peptide release factor	-1.08356	1.96119e-10		0.0784143		0.053102	-1.00673	1.37088e-11			0.02	0.51	0.17	0.51	-0.14	0.25	-0.28	0.25			-1.58	0.79	-1.35	0.43	-0.07	0.53	-0.3	0.59		-0.2824		-0.601082		-0.481533		-0.16285
AT5G43830	aluminum induced protein with YGL and LRDR motifs	protein_coding								not assigned.annotated		0.831953		0.0766905		0.116959		0.739498	1.28813		-0.14	0.041	-0.05	0.17	0.1	0.61	0.01	0.88			-1.58	0.01	-1.6	0.072	0.05	0.25	0.07	0.85		0.0085115		-0.271596		-0.156726		0.123382
AT2G24590	Barta et al (2010) have proposed a nomenclature for Serine/Arginine-Rich Protein Splicing Factors (SR proteins): Plant Cell. 2010, 22:2926.	protein_coding	RS-CONTAINING ZINC FINGER PROTEIN 22A (RSZ22a)	RS-CONTAINING ZINC FINGER PROTEIN 22A (At-RSZ22a);RS-CONTAINING ZINC FINGER PROTEIN 22A (RSZ22a)	RSZ22a					RNA processing.RNA splicing.spliceosome-associated non-snRNP factors.RSZ21/22 splicing factor		0.897183		0.88687		0.997125		0.719006													-1.56	0.071	-0.6	0.61	0.61	0.056	-0.35	0.45		0.0336831		-0.316259		-0.0740006		0.275942
AT2G27100	Identified as a leaf form mutant by Redei having serrated leaves. Further analysis of the single loss of function allele indicated pleiotropic effects extending to many aspects of shoot development such as taller meristems, alterations in phase transition, phyllotaxy and branching. Encodes a single zinc finger containing protein that is expressed in meristems and organ primordia and forms a compl…	protein_coding	SERRATE (SE)	SERRATE (SE)	SE					RNA biosynthesis.transcriptional activation.C2H2 zinc finger transcription factor	-0.744272	0.00124869		0.61968		0.740118	-1.02686	7.25049e-08			0.16	0.11	0.03	0.87	-0.06	0.83	0.07	0.59			-1.55	0.0012	-1.2	0.19	0.3	0.004	-0.06	0.7		0.226276		-0.773724		-0.31034		0.68966
AT5G57120	nucleolar/coiled-body phosphoprotein	protein_coding							1.09739	not assigned.not annotated	-1.86027	5.8259e-09	0.664861	0.0228088	0.836012	0.0320427	-1.68912	1.58084e-12	-1.27906	-1.00288											-1.53	0.34	-1.43	0.58	-0.17	0.47	-0.27	0.17		-0.51866		-0.957772		-0.510195		-0.0710831
AT3G01400	ARM repeat superfamily protein	protein_coding							1.33722	not assigned.annotated	0.674411	0.0444191		0.495985		0.786784	0.824615	0.0019424													-1.53	0.2	-1.2	0.72	0.18	0.86	-0.15	0.92		0.68054		-0.0605415		-0.149266		0.591816
AT5G67220	FMN-linked oxidoreductases superfamily protein	protein_coding							0.563113	RNA processing.RNA modification.dihydrouridylation.tRNA dihydrouridine synthase		0.118854		0.435156		0.944092		0.360659													-1.53	0.52	-0.69	0.78	0.15	0.47	-0.69	0.047		-0.378512		0.106915		0.0473057		-0.438121
AT4G11860	FAM63A-like protein (DUF544)	protein_coding								not assigned.not annotated	0.682964	0.00172809		0.117496		0.550723		0.57866			-0.18	0.078	0	0.86	0.06	0.36	-0.13	0.46			-1.52	0.021	-1.25	0.14	0.32	0.7	0.04	0.41		-0.298762		-0.595379		0.0927104		0.389327
AT3G13990	dentin sialophosphoprotein, putative (DUF1296)	protein_coding								not assigned.not annotated		0.553204		0.17721	-0.584889	0.00775912	-0.448201	0.0236062													-1.52	0.52	0.48	0.58	0.77	0.86	-1.23	0.6		0.132248		-0.0350469		0.0104924		0.177787
AT2G23350	polyadenylate-binding protein, putative / PABP, putative.Member of the Class II family of PABP proteins. Highly and ubiquitously expressed. The mRNA is cell-to-cell mobile.	protein_coding	POLY(A) BINDING PROTEIN 4 (PAB4)	POLY(A) BINDING PROTEIN 4 (PAB4);POLY(A) BINDING PROTEIN 4 (PABP4)	A					Protein biosynthesis.translation initiation.mRNA loading.PABP mRNA poly-A-tail binding factor	-1.7724	1.35815e-22	0.443927	0.0339094		0.0521666	-1.75461	1.07408e-25	-1.13675	-1.53468	-0.13	0.14	0.06	0.15	0.05	0.29	-0.14	0.073			-1.5	0.45	-0.7	0.63	1.24	0.44	0.44	0.73		-0.4885		-0.826668		-0.208108		0.130061
AT5G55640	Na-translocating NADH-quinone reductase subunit A	protein_coding								not assigned.not annotated		0.486276		0.505093		0.543981		0.501613													-1.48	0.98	0.1	0.51	2	0.11	0.42	0.94		-0.887973		-0.18117		0		-0.706804
AT1G71080	RNA polymerase II transcription elongation factor	protein_coding							1.37868	not assigned.not annotated		0.2		0.515309		0.54907		0.929998													-1.47	0.75	-1.42	0.72	0.19	0.58	0.14	0.92		-0.536053		0.665581	1	1		-0.201634
AT4G12610	transcription initiation factor IIF subunit alpha RAP74	protein_coding	(RAP74)	(ATRAP74); (RAP74)	RAP74				1.71726	RNA biosynthesis.RNA polymerase II-dependent transcription.pre-initiation complex.TFIIf basal transcription factor complex.alpha subunit		0.782083		0.0922141		0.407743		0.85932													-1.47	0.87	-0.26	0.36	2.06	0.36	0.84	0.92		0.0855757	-1.1343	-1.1343		-0.664539		0.555337
AT1G25260	Ribosomal protein L10 family protein	protein_coding								not assigned.not annotated	-1.21349	2.81265e-08		0.601239		0.698544	-1.21733	3.01303e-11													-1.46	0.011	-0.42	0.43	0.7	0.29	-0.34	0.15		-0.867693		-0.0925661		0.3249		-0.450227
AT3G07790	DGCR14-like protein	protein_coding								not assigned.not annotated		0.629553		0.733883		0.990581		0.264617													-1.46	0.26	0.89	0.58	1.96	0.58	-0.39	0.46		0		-0.813587		-0.258068		0.555519
AT1G69740	Encodes a putative 5-aminolevulinate dehydratase involved in chlorophyll biosynthesis.	protein_coding	(HEMB1)	5-AMINOLEVULINIC ACID DEHYDRATASE 1 (ALAD1); (HEMB1)	HEMB1				1.84479	Coenzyme metabolism.tetrapyrrol biosynthesis.uroporphyrinogen III formation.porphobilinogen synthase		0.827138		0.926479		0.815058		0.432369			-0.06	0.83	-0.13	0.33	0.01	0.14	0.07	0.83			-1.45	0.17	-2.13	0.01	-0.18	0.95	0.51	0.11		0.190184		-0.450443		-0.440162		0.200465
AT1G20110	Encodes a protein that is localized to the peripheral membrane of late endosomal compartments. Involved in the regulation of mulitivesicular/prevacuolar compartment protein sorting. Loss of function mutations are embryo lethal. Regulates IRT1-dependent metal transport and metal homeostasis. The mRNA is cell-to-cell mobile.	protein_coding	FYVE-DOMAIN PROTEIN 1 (FYVE1)	FYVE DOMAIN PROTEIN REQUIRED FOR ENDOSOMAL SORTING 1 (FREE1);FYVE-DOMAIN PROTEIN 1 (FYVE1)	FYVE1					Vesicle trafficking.endomembrane trafficking.ESCRT (Endosomal Sorting Complex Required for Transport) complexes.ESCRT-III complex.FREE1 associated protein		0.0822566		0.380674		0.0761657		0.323159													-1.44	0.061	-1.12	0.57	0.16	0.87	-0.15	0.2		0.037281		-0.0775829		0.182952		0.297816
AT1G61210	DWA3 encodes a DWD(DDB1 binding WD40) protein. Invitro analyses suggest its involvement in the negative regulation of ABA responses.One of four katanin p80 subunits. Involved in targeting of katanin complex to crossover and branch points to properly sever microtubules.	protein_coding	DWD HYPERSENSITIVE TO ABA 3 (DWA3)	DWD HYPERSENSITIVE TO ABA 3 (DWA3);KATANIN P80 SUBUNIT 2 (KTN80.2)	DWA3				2.31765	Cell cycle.cytokinesis.phragmoplast disassembly.Katanin ATP-dependent microtubule severing complex.regulatory component		0.390007		0.215584		0.108391		0.543547													-1.44	0.51	-20.87	0.51	-6.38	1	13.05	1		0.331844		-0.214125		-0.156402		0.389567
AT2G41500	Encodes LACHESIS (LIS), a protein with seven WD40 repeats. LIS is homologous to the yeast splicing factor PRP4 which is associated with the U4/U6 complex of the spliceosome. LIS is involved in a mechanism that prevents accessory cells from adopting gametic cell fate: lis mutant forms supernumerary egg cells.	protein_coding	LACHESIS (LIS)	LACHESIS (LIS); (ATSAP60); (ATPRP4); (EMB2776)	LIS					RNA processing.RNA splicing.U2-type-intron-specific major spliceosome.U4/U6 small nuclear ribonucleoprotein particle (snRNP).PRPF4 snRNP component		0.10355		0.489144		0.474613	-0.579027	0.0443318													-1.43	0.75	-1.54	0.36	-0.22	0.36	-0.11	0.92				0.0641303				0.0614005
AT2G39730	Rubisco activase, a nuclear-encoded chloroplast protein that consists of two isoforms arising from alternative splicing in most plants. Required for the light activation of rubisco. Involved in jasmonate-induced leaf senescence.	protein_coding	RUBISCO ACTIVASE (RCA)	RUBISCO ACTIVASE (RCA)	RCA					Photosynthesis.calvin cycle.ribulose-1,5-bisphosphat carboxylase/oxygenase (RuBisCo) activity.regulation.ATP-dependent activase		0.605384	-0.64087	0.000545521	-0.839422	2.77893e-06		0.836627		-1.74778	-0.04	0.88	-0.4	0	-0.26	0	0.11	0.41			-1.43	0.093	-2.12	0.0073	-1.49	0.014	-0.79	0.18		-0.0423108		-0.480432		-0.0839784		0.354143
AT2G34680	isolated from differential screening of a cDNA library from auxin-treated root culture. sequence does not show homology to any known proteins and is predicted to be extracellular.	protein_coding	AUXIN-INDUCED IN ROOT CULTURES 9 (AIR9)	AUXIN-INDUCED IN ROOT CULTURES 9 (AIR9)	AIR9					Cell cycle.cytokinesis.cell-plate formation.AIR9 cell plate maturation factor		0.738542	0.358764	0.0155075		0.973842	-0.446544	0.00059071			-0.17	0.47	0.32	0.12	0.45	0.045	-0.04	0.7			-1.43	0.27	-2.67	0.31	2.03	0.064	3.27	0.13		-0.0671142	-1	-1		-0.290779		0.642106
AT3G27960	Tetratricopeptide repeat (TPR)-like superfamily protein	protein_coding	KINESIN LIGHT CHAIN-RELATED 2 (KLCR2)	KINESIN LIGHT CHAIN-RELATED 2 (KLCR2)	KLCR2					not assigned.annotated		0.698596		0.117146		0.125674		0.548459													-1.42	0.28	-2.38	0.25	-0.2	0.83	0.76	0.25		-0.023459	-1	-1		-0.673349		0.303192
AT5G04420	Galactose oxidase/kelch repeat superfamily protein	protein_coding							3.60707	not assigned.annotated		0.129708		0.549703		0.853484	-0.512524	0.00986259			0.42	0.2	0.76	0.03	0.26	0.67	-0.09	0.73			-1.42	0.91	-0.86	0.24	0.08	1	-0.48	0.11		-0.156869		-0.708111		-0.132638		0.418604
AT5G44660	hypothetical protein	protein_coding								not assigned.not annotated		0.401947	-1.01589	0.0275171		0.0559082		0.332436													-1.42	0.28	-1.21	0.51	0.14	0.56	-0.07	0.56
AT3G10530	Transducin/WD40 repeat-like superfamily protein	protein_coding							0.933638	Protein biosynthesis.cytosolic ribosome.small subunit (SSU).SSU processome.UTP7 assembly factor	-2.24293	3.3432e-06	1.05689	0.0113438	1.19784	0.0387364	-2.10198	3.02846e-09	-2.53975												-1.4	0.57	-0.17	0.56	1.76	0.49	0.53	0.16			-1.57845	-1.57845				0.484034
AT4G33250	Encodes initiation factor 3k (EIF3k).	protein_coding	EUKARYOTIC TRANSLATION INITIATION FACTOR 3K (EIF3K)	(ATTIF3K1); (TIF3K1);EUKARYOTIC TRANSLATION INITIATION FACTOR 3K (EIF3K)	EIF3K				1.08609	Protein biosynthesis.translation initiation.pre-initiation complex (PIC).eIF3 mRNA-to-PIC binding complex.eIF3k component	-0.512227	0.00222823		0.464844		0.71981	-0.458848	0.0017462			0.14	0.034	0.08	0.16	0.03	0.55	0.09	0.17			-1.4	0.3	-0.93	0.79	0.75	0.64	0.27	0.5		-0.220769		0.216811		0.305936		-0.131644
AT3G11670	Responsible for the final assembly of galactolipids in photosynthetic membranes. Provides stability to the PS I core complex (e.g. subunits PsaD, PsaE).	protein_coding	DIGALACTOSYL DIACYLGLYCEROL DEFICIENT 1 (DGD1)	DIGALACTOSYL DIACYLGLYCEROL DEFICIENT 1 (DGD1)	DGD1				0.950574	Lipid metabolism.galactolipid and sulfolipid synthesis.digalactosyldiacylglycerol synthase	0.55854	0.00782254		0.858989		0.261449		0.117341													-1.4	0.94	-0.83	0.36	-1.23	0.2	-1.8	0.009		0.0506261		-0.691878		-0.431716		0.310788
AT4G25340	Encodes a member of the FKBP-type immunophilin family that functions as a histone chaparone. Binds to 18S rDNA and represses its expression.	protein_coding	FK506 BINDING PROTEIN 53 (FKBP53)	(ATFKBP53);FK506 BINDING PROTEIN 53 (FKBP53)	FKBP53					Protein modification.protein folding and quality control.protein folding catalyst activities.FKBP protein folding catalyst	-0.85301	0.0166344		0.0521383		0.0811692	-0.842426	0.00535464	-2.83346		-0.11	0.34	0.3	0.27	0.4	0.053	-0.01	0.59			-1.39	0.63	-1.28	0.86	0.02	0.86	-0.1	0.6		0.146486		-0.658384		-0.680063		0.124806
AT3G55560	AT-hook protein of GA feedback 2	protein_coding	AT-HOOK MOTIF NUCLEAR-LOCALIZED PROTEIN 15 (AHL15)	AT-HOOK MOTIF NUCLEAR-LOCALIZED PROTEIN 15 (AHL15);AT-HOOK PROTEIN OF GA FEEDBACK 2 (AGF2)	AHL15					not assigned.annotated		0.555205		0.578947		0.816765		0.657814			0.22	0.66	-0.01	0.56	0	0.53	0.22	0.45			-1.39	0.25	-1	0.36	1.18	0.29	0.78	0.55		0.103093		-0.273761		-0.263034		0.11382
AT3G04910	Serine/threonine protein kinase, whose transcription is regulated by circadian rhythm.	protein_coding	WITH NO LYSINE (K) KINASE 1 (WNK1)	WITH NO LYSINE (K) KINASE 1 (WNK1); (ATWNK1); (ZIK4)	K				1.56478	Protein modification.phosphorylation.STE kinase superfamily.MAP3K-WNK kinase		0.943686		0.586289		0.20279		0.587844													-1.39	0.75	-2.98	0.86	1.23	0.58	2.82	0.92		0.0558532		-0.633218		-0.18484		0.504231
AT4G27500	interacts with H+-ATPase, and regulates its activity The mRNA is cell-to-cell mobile.	protein_coding	PROTON PUMP INTERACTOR 1 (PPI1)	PROTON PUMP INTERACTOR 1 (PPI1)	PPI1					not assigned.annotated		0.0566205	0.408651	0.0284481		0.553399	-0.628581	8.5793e-05			0.29	0.024	0.49	0	0.2	0.043	-0.01	0.2			-1.38	0.87	-2.28	0.47	3.3	0.27	4.2	0.12		-0.445411		-0.733213		-0.250808		0.0369942
AT1G59710	actin cross-linking protein (DUF569)	protein_coding								not assigned.not annotated		0.589549		0.0959594		0.552274		0.065332													-1.38	0.26	-1.06	0.58	2.59	0.1	2.26	0.17		0.0804899		0.0117772		0.118056		0.186769
AT4G32285	Putative clathrin assembly protein, component of TPLATE complex that functions in clathrin-mediated endocytosis.	protein_coding	CLATHRIN ASSOCIATED PROTEIN 1 (CAP1)	CLATHRIN ASSOCIATED PROTEIN 1 (CAP1); (PICALM4B)	CAP1					Vesicle trafficking.clathrin coated vesicle (CCV) machinery.TPLATE AP-2 co-adaptor complex.CAP1/ECA4 component		0.427724		0.133379		0.417469		0.0875394													-1.38	0.25	-0.8	0.84	1.11	0.13	0.53	0.82		-0.402759		-0.76184		-0.037153		0.321928
AT4G37930	Encodes a protein with mitochondrial serine hydroxymethyltransferase activity, which functions in the photorespiratory pathway, catalyzes the conversion of serine and tetrahydrofolate to glycine and 5,10-methylene tetrahydrofolate. Involved in controlling cell damage caused by abiotic stress, such as high light and salt and the hypersensitive defense response of plants.	protein_coding	SERINE TRANSHYDROXYMETHYLTRANSFERASE 1 (SHM1)	SERINE TRANSHYDROXYMETHYLTRANSFERASE 1 (SHM1);SERINE HYDROXYMETHYLTRANSFERASE 1 (SHMT1);SERINE TRANSHYDROXYMETHYLTRANSFERASE (STM)	SHM1				1.48689	Photosynthesis.photorespiration.serine hydroxymethyltransferase		0.16685	-0.642156	6.77203e-05	-0.608314	0.000226402		0.0884112			-0.18	0.022	-0.27	0.0042	0.02	0.91	0.11	0.49			-1.37	0.01	-4.27	0.0062	-2.15	0.0062	0.76	0.75		0.0178113		-0.264828		-0.105554		0.177085
AT1G79280	Encodes a 237-kDA protein with similarity to vertebrate Tpr, a long coiled-coil proteins of nuclear pore inner basket filaments. It is localized to the inner surface of the nuclear envelope and is a component of the nuclear pore-associated steps of sumoylation and mRNA export in plants. Mutations affect flowering time regulation and other developmental processes. Probably acts in the same pathway…	protein_coding	NUCLEAR PORE ANCHOR (NUA)	NUCLEAR PORE ANCHOR (NUA)	NUA				1.66279	Protein translocation.nucleus.nucleocytoplasmic transport.nuclear pore complex (NPC).nuclear basket.NUA nucleoporin		0.298104	0.609479	0.00669318		0.844502	-0.82226	3.69231e-05			0.13	0.58	0.26	0.63	0.08	0.75	-0.05	0.89			-1.37	0.68	-1.12	0.44	0.69	0.27	0.45	0.12		-0.0885367	-1.34792	-1.34792		-0.562314		0.697073
AT1G36160	Encodes acetyl-CoA carboxylase. Mutant displays uncoordinated cell divisions which are enhanced by cytokinins. Mutant also has aberrant organization of the apical region in the embryo and abnormal root and shoot development and is deficient in freezing tolerance after cold acclimation. Essential for very long chain fatty acid elongation. The mRNA is cell-to-cell mobile.	protein_coding	ACETYL-COA CARBOXYLASE 1 (ACC1)	ACETYL-COA CARBOXYLASE 1 (ACC1);SENSITIVE TO FREEZING 3 (SFR3);GLOSSYHEAD 1 (GSD1);EMBRYO DEFECTIVE 22 (EMB22);GURKE (GK);PASTICCINO 3 (PAS3); (AT-ACC1)	ACC1				2.78782	Lipid metabolism.fatty acid synthesis.acetyl-CoA carboxylation.monomeric acetyl-CoA carboxylase	0.386694	0.0467846	0.750618	1.09161e-05		0.485359		0.392745			0.2	0.099	0.35	0	0.22	0.00035	0.07	0.25			-1.37	0.19	-1.67	0.29	0.24	0.28	0.54	0.27		-0.167457	-1.23563	-1.23563		-0.335867		0.732304
AT3G05090	Encodes a DCAF protein. Mutants are defective in lateral root development and suggest roles for DDB1-Cul4?mediated protein degradation in regulating auxin accumulation during lateral root primordium development and lateral root meristem emergence.	protein_coding	LATERAL ROOT STIMULATOR 1 (LRS1)	LATERAL ROOT STIMULATOR 1 (LRS1)	LRS1					not assigned.annotated		0.767263		0.393959		0.773485		0.322566													-1.37	0.69	-1.57	0.7	-0.31	0.37	-0.11	0.64		-0.0528519		-0.595379		-0.271673		0.270854
AT1G74910	KONJAC1 is imilar to sugar pyrophosphorylases but has an insertion of 2 AA in the pyrophosphorylase consensus motif that is highly conserved in GMPPs. It lacks GDP-mannose pyrophosphorylase activity but can simulate the GDP-mannose pyrophosphorylase activity of VTC1.	protein_coding	KONJAC 1 (KJC1)	KONJAC 1 (KJC1)	KJC1					not assigned.annotated		0.298702		0.145293		0.710098		0.8258			0.04	0.95	-0.38	0.32	-0.1	0.37	0.32	0.71			-1.36	0.061	-1.5	0.059	-0.29	0.59	-0.15	0.57		0.213707		-0.222392		-0.443189		-0.00708942
AT4G37300	maternal effect embryo arrest 59	protein_coding	MATERNAL EFFECT EMBRYO ARREST 59 (MEE59)	MATERNAL EFFECT EMBRYO ARREST 59 (MEE59)	MEE59				2.60532	not assigned.not annotated		0.110519	-0.613919	0.00022457	-0.404304	0.0366987		0.633649			0.05	0.29	-0.08	0.13	-0.09	0.0012	0.05	0.87			-1.35	0.83	-21.78	0.51	1.66	0.56	22.08	0.56		-0.194378		0.304855		0.293914		-0.205319
AT4G15802	Encodes a protein with similarity to heat shock factor binding proteins. Involved in negative regulation of heat shock response. Becomes nuclear localized upon heat treatment.	protein_coding	HEAT SHOCK FACTOR BINDING PROTEIN (HSBP)	HEAT SHOCK FACTOR BINDING PROTEIN (HSBP);ARABIDOPSIS THALIANA HEAT SHOCK FACTOR BINDING PROTEIN (AtHSBP)	HSBP					not assigned.not annotated		0.692627		0.567258		0.0502419	0.429603	0.00838432			-0.06	0.13	0.11	0.13	0.12	0.0025	-0.05	0.24			-1.34	0.0016	-1.35	0.0043	0.85	0.03	0.87	0.054		0.444641		0.027879		-0.546692		-0.12993
AT1G23860	Encodes a 9G8-like serine-arginine rich (SR) protein that interacts in vivo with U1-70K, a U1 small nuclear ribonucleoprotein 70-kDa protein that is involved in nuclear precursor mRNA processing. Barta et al (2010) have proposed a nomenclature for Serine/Arginine-Rich Protein Splicing Factors (SR proteins): Plant Cell. 2010, 22:2926.	protein_coding	RS-CONTAINING ZINC FINGER PROTEIN 21 (RSZ21)	(SRZ-21); (SRZ21);RS-CONTAINING ZINC FINGER PROTEIN 21 (At-RSZ21);RS-CONTAINING ZINC FINGER PROTEIN 21 (RSZ21);RS-CONTAINING ZINC FINGER PROTEIN 21 (RSZP21)	RSZ21					RNA processing.RNA splicing.spliceosome-associated non-snRNP factors.RSZ21/22 splicing factor		0.220378		0.292099	-0.790632	0.0490162	-0.890618	0.00567348													-1.34	0.59	-1.04	0.86	0.16	0.72	-0.14	0.79		-0.617384		-0.418604		0.715494		0.516714
AT3G51120	zinc finger CCCH domain-containing protein 44	protein_coding							1.10682	not assigned.annotated		0.962505		0.975628		0.337411		0.242127													-1.33	0.63	-1.69	0.72	-0.27	0.58	0.08	0.3		-0.136062		-0.785875		-0.141472		0.508341
AT1G19870	Encodes a microtubule-associated protein.	protein_coding	IQ-DOMAIN 32 (iqd32)	IQ-DOMAIN 32 (iqd32)	iqd32				1.69597	not assigned.annotated		0.655515		0.537968		0.637992		0.655569			0.02	0.88	0.25	0.015	0.18	0.062	-0.05	0.21			-1.32	0.004	-0.81	0.38	1.21	0.00011	0.71	0.18		0		-0.626957		-0.564415		0.0625415
AT4G13350	Encodes a GTPase that interacts with nuclear shuttle proteins (NSPs) from a number of different plant viruses. The gene is widely expressed and NIG transcript levels do not rise in response to viral infection. This cytoplasmic protein does not directly interact with a viral movement protein (MP), but, it does promote the movement of NSP from the nucleus to the cytoplasm. Overexpression of NIG in …	protein_coding	NSP (NUCLEAR SHUTTLE PROTEIN)-INTERACTING GTPASE (NIG)	NSP (NUCLEAR SHUTTLE PROTEIN)-INTERACTING GTPASE (NIG)	NUCLEAR SHUTTLE PROTEIN					not assigned.annotated		0.739142		0.242932		0.2757		0.664583			0.12	0.34	0.03	0.59	-0.07	0.75	0.02	0.67			-1.31	0.024	-1	0.21	0.4	0.087	0.09	0.8		0.0435016		-0.222392		-0.12683		0.139064
AT1G13020	Encodes eIF4B2, eukaryotic initiation factor 4B2.	protein_coding	EUKARYOTIC INITIATION FACTOR 4B2 (EIF4B2)	EUKARYOTIC INITIATION FACTOR 4B2 (EIF4B2)	EIF4B2					Protein biosynthesis.translation initiation.mRNA loading.eIF4B mRNA unwinding factor	-1.08943	6.83853e-08		0.985079		0.997084	-1.08537	2.39725e-10			-0.33	0.078	0.03	0.58	0.14	0.36	-0.21	0.6			-1.3	0.11	-0.31	0.092	0.23	0.86	-0.76	0.00023		-0.0493277		-0.519778		-0.15899		0.311461
AT5G41260	kinase with tetratricopeptide repeat domain-containing protein	protein_coding	BRASSINOSTEROID-SIGNALING KINASE 8 (BSK8)	BRASSINOSTEROID-SIGNALING KINASE 8 (BSK8)	BSK8				1.09336	Protein modification.phosphorylation.TKL kinase superfamily.RLCK-XII kinase		0.92243		0.79045		0.304032		0.529203													-1.3	0.73	-0.96	0.95	1.5	0.55	1.16	0.88		0.647328		-0.287577		-0.664816		0.270089
AT4G31880	One of 5 PO76/PDS5 cohesion cofactor orthologs of Arabidopsis.	protein_coding	(PDS5C)	(ATPDS5C); (PDS5C)	PDS5C					Cell cycle.mitosis and meiosis.sister chromatid separation.cohesin establishment.PDS5 cohesin cofactor		0.803479		0.0545201		0.761323		0.31342			-0.06	0.84	0.09	0.03	0.08	0.35	-0.07	0.22			-1.3	0.25	-1.28	0.63	1.1	0.15	1.07	0.47		0.0161197		-0.890771		-0.383329		0.523562
AT1G31930	Encodes XLG3 (extra-large G protein 3) that shows significant similarity to the G protein alpha subunit in its C terminal region. Involved in the regulation of root morphological and growth responses.	protein_coding	EXTRA-LARGE GTP-BINDING PROTEIN 3 (XLG3)	EXTRA-LARGE GTP-BINDING PROTEIN 3 (XLG3)	XLG3				2.32347	External stimuli response.biotic stress.pathogen-associated molecular pattern (PAMP).PTI (pattern-triggered immunity) network.bacterial elicitor response.non-canonical heterotrimeric G-protein complex.XLG atypical G-alpha component		0.70291		0.340736		0.411478		0.667162													-1.29	0.15	-0.38	0.72	1.22	0.27	0.31	0.75		0.113956		-0.797507		-0.645569		0.265894
AT1G09840	shaggy-like protein kinase 41	protein_coding	SHAGGY-LIKE PROTEIN KINASE 41 (SK41)	SHAGGY-LIKE PROTEIN KINASE 41 (ATSK41);SHAGGY-LIKE PROTEIN KINASE 41 (SK41);HYPERSENSITIVE INDUCED REACTION 1 (HIR1); (AtHIR1)	SK41					Protein modification.phosphorylation.CMGC kinase superfamily.GSK kinase	-0.620517	0.0314789		0.636898		0.970759		0.0889695													-1.28	0.76	-1.67	0.87	1.94	0.29	2.34	0.64		0.485427		0.263034		-0.21042		0.0119726
AT4G04210	Arabidopsis thaliana CDC48-interacting UBX-domain protein (PUX4)	protein_coding	PLANT UBX DOMAIN CONTAINING PROTEIN 4 (PUX4)	(PUX4);PLANT UBX DOMAIN CONTAINING PROTEIN 4 (PUX4)	PUX4				4.43199	not assigned.annotated		0.338944		0.839355		0.462225		0.645745			0.05	0.77	0.1	0.54	0.01	0.92	-0.04	0.5			-1.28	0.1	-1.68	0.03	-0.01	0.92	0.4	0.3		0.264416		-0.31366		-0.367509		0.210567
AT5G27650	PWWP domain protein involved in regulation of FLC and flowering time.	protein_coding	PWWP DOMAIN PROTEIN 1 (PDP1)	PWWP DOMAIN PROTEIN 1 (PDP1)	PDP1					not assigned.not annotated		0.616334		0.727892		0.901019		0.118192													-1.26	0.89	-1.34	0.63	-0.41	0.71	-0.33	0.82		0.314511		-0.331206		-0.440042		0.205675
AT2G03640	Nuclear transport factor 2 (NTF2) family protein with RNA binding (RRM-RBD-RNP motifs) domain-containing protein	protein_coding							6.75	not assigned.not annotated		0.372169		0.459753		0.211447		0.0748037			0.15	0.47	0.43	0.015	0.25	0.083	-0.03	0.47			-1.25	0.52	-1.4	0.47	-0.09	0.72	0.07	0.75		-0.241008		-0.33787		-0.127235		-0.0303736
AT4G14540	nuclear factor Y, subunit B3	protein_coding	NUCLEAR FACTOR Y, SUBUNIT B3 (NF-YB3)	NUCLEAR FACTOR Y, SUBUNIT B3 (NF-YB3)	NF-YB3					RNA biosynthesis.transcriptional activation.NF-Y transcription factor complex.NF-YB component	0.830954	0.0123191		0.0892222	-0.746688	0.0226969	0.703828	0.0230365	1.32273												-1.24	0.11	-2.6	0.0062	-1.08	0.028	0.28	0.17		0.0882865		0.0816838		-0.193586		-0.186984
AT2G27710	60S acidic ribosomal protein family	protein_coding				P2b				Protein biosynthesis.cytosolic ribosome.large subunit (LSU).LSU proteome component.RPP2 component	-1.33451	7.61769e-25		0.51124	0.667847	2.81792e-06	-0.786875	1.1797e-11		-1.30013	-0.16	0.0095	0.06	0.82	0.13	0.18	-0.09	0.29			-1.23	0.0042	-1.39	0	-0.04	0.37	0.12	0.12		0.183797		0.0688951		-0.464185		-0.349283
AT1G61730	DNA-binding storekeeper protein-related transcriptional regulator	protein_coding							3.24463	RNA biosynthesis.transcriptional activation.GeBP transcription factor	-0.768885	0.0084818		0.173794		0.191365	-0.717014	0.00194759	-1.0542												-1.23	0.52	-2.26	0.0062	-0.1	0.36	0.93	0.75		-0.0221957		-0.226068		-0.092364		0.111508
AT2G34310	hypothetical protein	protein_coding								not assigned.not annotated		0.537267		0.513854		0.824778		0.782648													-1.23	0.12	-3.35	0	-1.67	0.096	0.45	0.33		-0.0931094		-0.0181473		0.0658021		-0.00916
AT2G27210	BRI1 suppressor 1 (BSU1)-like 3	protein_coding	BRI1 SUPPRESSOR 1 (BSU1)-LIKE 3 (BSL3)	BRI1 SUPPRESSOR 1 (BSU1)-LIKE 3 (BSL3)	BSL3					Protein modification.dephosphorylation.serine/threonine protein phosphatase superfamily.PPP Fe-Zn-dependent phosphatase families.PPKL phosphatase		0.104984		0.102496		0.448161	-0.571387	0.00321502													-1.22	0.021	-1.39	0.037	0.26	0.051	0.43	0.11		-0.277985	-1.10806	-1.10806		-0.379414		0.450661
AT4G16630	DEA(D/H)-box RNA helicase family protein	protein_coding							2.32595	not assigned.annotated	-1.48283	9.21569e-06	1.03502	0.000445677	0.97017	0.00962863	-1.54767	2.09093e-09	-2.1												-1.21	0.34	-1.04	0.53	1.68	0.14	1.51	0.21			-1.37685	-1.37685				0.0937821
AT4G35300	tonoplast monosaccharide transporter2	protein_coding	TONOPLAST MONOSACCHARIDE TRANSPORTER2 (TMT2)	TONOPLAST MONOSACCHARIDE TRANSPORTER2 (TMT2)	TMT2				1.11793	Solute transport.carrier-mediated transport.MFS superfamily.SP family.monosaccharide transporter (AZT-type)		0.256068		0.156835		0.707066		0.749062													-1.21	0.75	-1.94	0.86	1.93	0.86	2.67	0.92		0.316672		-0.371969		-0.349839		0.338802
AT1G20440	Belongs to the dehydrin protein family, which contains highly conserved stretches of 7-17 residues that are repetitively scattered in their sequences, the K-, S-, Y- and lysine rich segments. Cold regulated gene, amino acid sequence homology with Group II LEA (late embryogenesis abundant) proteins. Also responds to osmotic stress, ABA, dehydration and inhibits e.coli growth while overexpressed. C…	protein_coding	COLD-REGULATED 47 (COR47)	COLD-REGULATED 47 (COR47); (AtCOR47); (RD17)	COR47				0.949892	not assigned.annotated	0.917858	1.75822e-06		0.0578778		0.772266		0.0790903		0.0603965	0.08	0.77	0.16	0.022	0.16	0.0033	0.08	0.23			-1.19	0.53	-0.89	0.92	0.34	0.78	0.04	0.62		0.0764981		-0.570749		-0.477322		0.169925
AT5G09250	putative transcriptional co-activator (KIWI) mRNA, complete	protein_coding	(KIWI)	(KIWI)	KIWI				2.64635	not assigned.annotated		0.409603		0.904311		0.411058		0.895208													-1.19	0.11	-1.24	0.14	0.02	0.58	0.07	0.92		0.343587		-0.166897		-0.255411		0.255073
AT3G53710	A member of ARF GAP domain (AGD), A thaliana has 15 members, grouped into four classes.	protein_coding	ARF-GAP DOMAIN 6 (AGD6)	ARF-GAP DOMAIN 6 (AGD6)	AGD6					Vesicle trafficking.Coat protein I (COPI) coatomer machinery.ARF-GTPase-activating (ARF-GAP) activities.class II ARF-GAP protein		0.67721		0.0897365		0.555414		0.810118													-1.18	0.065	-0.9	0.6	0.14	0.29	-0.14	0.88		-0.293359		-0.736966		-0.396301		0.0473057
AT3G55020	Ypt/Rab-GAP domain of gyp1p superfamily protein	protein_coding							2.33851	Vesicle trafficking.regulation of membrane tethering and fusion.RAB-GTPase-activating protein (RAB-GAP)		0.532646		0.624533		0.912721		0.186689													-1.18	0.065	-1.67	0.13	-0.46	0.66	0.03	0.7		0		-0.407175		-0.301381		0.105795
AT2G37970	SOUL heme-binding family protein	protein_coding	(SOUL-1)	(SOUL-1); (ATHBP2);HAEM-BINDING PROTEIN 2 (HBP2)	SOUL-1					not assigned.not annotated		0.783762		0.859216		0.844854		0.315994	1.21628	0.015548	0.68	0.28	0.35	0.51	-0.41	0.56	-0.08	1			-1.17	0.26	-1.15	0.14	0	0.86	-0.02	0.75		0.375639		0.186413		-0.686725		-0.4975
AT4G22740	glycine-rich protein	protein_coding							1.13738	not assigned.not annotated		0.462934		0.672724		0.760353		0.289422													-1.16	0.15	-0.4	0.47	0.44	0.068	-0.32	0.25		-0.172467		-0.39486		0.0227201		0.245112
AT4G09980	Encodes a member of a core set of mRNA m6A writer proteins and is required for N6-adenosine methylation of mRNA.	protein_coding	EMBRYO DEFECTIVE 1691 (EMB1691)	METHYLTRANSFERASE B (MTB);EMBRYO DEFECTIVE 1691 (EMB1691)	EMB1691				2.08436	RNA processing.RNA modification.mRNA methylation.adenosine N6-methyltransferase complex.MTB component	-0.916615	0.000973945		0.572051		0.916333	-1.05436	1.86232e-06													-1.15	0.13	-0.93	0.25	1.34	0.025	1.12	0.021		-0.226276		-0.824913		-0.268489		0.330149
AT5G56980	cotton fiber protein	protein_coding							0.417908	RNA processing.RNA modification.tRNA N6-threonylcarbamoylation.KEOPS/EKC complex.BUD32 component		0.295642		0.634629		0.793052		0.864031													-1.15	0.05	-0.53	0.87	0.71	0.00063	0.09	0.75		0.306926		0.380424		-0.162092		-0.23559
AT1G42550	Encodes a plant-specific protein of unknown function that appears to be conserved among angiosperms. The mRNA is cell-to-cell mobile.	protein_coding	PLASTID MOVEMENT IMPAIRED1 (PMI1)	PLASTID MOVEMENT IMPAIRED1 (PMI1)	PMI1					Cytoskeleton.cp-actin-dependent plastid movement.PMI1/PMI15 cp-actin stability factor		0.469881		0.252591	-0.597544	0.00621427		0.711535			0.13	0.095	0.13	0.055	-0.02	0.82	-0.02	0.54			-1.15	0.076	-0.63	0.07	0.59	0.24	0.07	0.22		-0.0313642		-0.924449		-0.213174		0.679911
AT5G47910	NADPH/respiratory burst oxidase protein D (RbohD).Interacts with AtrbohF gene to fine tune the spatial control of ROI production and hypersensitive response to cell in and around infection site. The mRNA is cell-to-cell mobile.	protein_coding	RESPIRATORY BURST OXIDASE HOMOLOGUE D (RBOHD)	(ATRBOHD);RESPIRATORY BURST OXIDASE HOMOLOGUE D (RBOHD)	RBOHD				0.904116	Redox homeostasis.reactive oxygen generation.Rboh NADPH-oxidase	0.402834	0.0320279		0.156835	-0.394829	0.0374028		0.105321		2.14273											-1.14	0.34	-0.65	0.58	0.1	0.47	-0.4	0.17		0.0537713		-0.496426		0.110054		0.660251
AT1G24160	triadin	protein_coding							1.38266	not assigned.not annotated	0.615646	0.00348899		0.451804		0.0670171		0.0620319		0.481689											-1.14	0.44	-0.55	0.91	0.01	0.56	-0.59	0.13		0.0236513		-0.964667		-0.51625		0.472068
AT5G57330	Galactose mutarotase-like superfamily protein	protein_coding								not assigned.annotated		0.43232		0.547866		0.348765		0.604909			0.13	0.49	-0.19	0.34	-0.42	0.076	-0.11	0.59			-1.13	0.2	-1.16	0.1	-0.15	0.068	-0.11	0.46		0.00916		-0.155069		-0.281413		-0.117184
AT2G38410	ENTH/VHS/GAT family protein	protein_coding								Vesicle trafficking.endomembrane trafficking.protein recycling.ubiquitylated cargo adaptors.TOM associated protein		0.23797		0.811315		0.753086		0.17682			0.94	0.11	0.66	0.52	-0.24	0.11	0.03	0.83			-1.13	0.57	0.76	0.081	1.54	0.5	-0.35	0.73		0.336283		-0.344648		-0.291889		0.389042
AT4G03550	Encodes a callose synthase that is required for wound and papillary callose formation in response to fungal pathogens Erysiphe and Blumeria. Mutants are resistant to P. parasitica and exhibit an exaggerated PR1 response.Contributes to PAMP-induced basal defense. The mRNA is cell-to-cell mobile.	protein_coding	GLUCAN SYNTHASE-LIKE 5 (GSL05)	ENHANCER OF EDR1 3 (EED3); (GSL05);GLUCAN SYNTHASE-LIKE 5 (ATGSL05);GLUCAN SYNTHASE-LIKE 5 (GSL05); (ATGSL5);POWDERY MILDEW RESISTANT 4 (PMR4);GLUCAN SYNTHASE-LIKE 5 (GSL5)	GSL05				1.18796	Cell wall.callose.callose synthase		0.0999621		0.440785		0.860732	-0.441374	0.00620969			0.72	0.11	0.46	0.27	0.11	0.36	0.37	0.17			-1.13	0.34	-0.91	0.36	0.15	0.58	-0.07	0.46		-0.121306		-0.596644		-0.160465		0.314873
AT3G07330	encodes a gene similar to cellulose synthase	protein_coding	CELLULOSE-SYNTHASE-LIKE C6 (CSLC6)	CELLULOSE-SYNTHASE-LIKE C6 (CSLC6);CELLULOSE-SYNTHASE-LIKE C6 (ATCSLC6);CELLULOSE-SYNTHASE LIKE C6 (CSLC06); (ATCSLC06)	CSLC6				1.41772	Cell wall.hemicellulose.xyloglucan.synthesis.CSLC-type 1,4-beta-glucan synthase	-0.643892	0.00577821		0.479915		0.666099	-0.686152	0.000259341													-1.12	0.52	-0.86	0.36	0.26	0.47	0	0.92		0.244622		-0.0972972		-0.153474		0.188445
AT1G21380	Target of Myb protein 1	protein_coding								Vesicle trafficking.endomembrane trafficking.protein recycling.ubiquitylated cargo adaptors.TOM associated protein		0.13274		0.289903		0.754558		0.344674													-1.12	0.018	0.04	0.79	0.53	0.51	-0.63	0.41		0.25634		-0.263034		-0.472068		0.0473057
AT1G29220	transcriptional regulator family protein	protein_coding							1.84607	not assigned.not annotated		0.953068		0.845863		0.678761		0.870702													-1.12	0.87	0.53	0.27	2.16	0.58	0.51	0.75		0.328054		-0.425306		-0.682971		0.0703893
AT1G49040	Encodes soluble protein containing N-terminal DENN domain and eight C-terminal WD-40 repeats. Involved in cytokinesis of guard mother cells and leaf epidermal cells. The overall growth and development of mutant plants is severely affected, they are smaller than wt, with defects in seedling development, leaf expansion and flower morphology which renders the mutant conditionally sterile.	protein_coding	STOMATAL CYTOKINESIS-DEFECTIVE 1 (SCD1)	STOMATAL CYTOKINESIS-DEFECTIVE 1 (SCD1)	SCD1					Vesicle trafficking.endomembrane trafficking.post-Golgi trafficking.SCD complex.SCD1 protein		0.383626		0.158862		0.850656	-0.63615	0.000377152													-1.12	0.83	-0.36	0.51	0.88	0.56	0.12	1		-0.546488		-0.887525		0.135777		0.476814
AT2G45540	WD-40 repeat family protein / beige-like protein	protein_coding	BEACH-DOMAIN HOMOLOG C2 (BCHC2)	BEACH-DOMAIN HOMOLOG C2 (BCHC2)	BCHC2					not assigned.annotated		0.783762	0.506544	0.000372213		0.681647	-0.669894	1.41476e-07			0.22	0.49	-0.09	0.89	-0.28	0.21	0.04	0.88			-1.11	0.56	-0.78	0.74	0.67	0.16	0.33	0.74		-0.38529	-1	-1		0.0146468		0.629357
AT1G35580	CINV1 / A/N-InvG is an alkaline/neutral invertase that breaks sucrose down into fructose and glucose (GH100). The exact localization of CINV1 remains under investigation but there is evidence that fluorescently-tagged CINV1 localizes to the cytoplasm. atinvg mutants have reduced root growth, reduced invertase activity, and increased expression of antioxidant genes under basal conditions. The leve…	protein_coding	CYTOSOLIC INVERTASE 1 (CINV1)	ALKALINE/NEUTRAL INVERTASE G (A/N-InvG);CYTOSOLIC INVERTASE 1 (CINV1)	CINV1				4.00215	not assigned.annotated	-0.399097	0.0300675	-0.390646	0.0295149	-0.483469	0.0080156	-0.49192	0.00228991	1.94756		-0.15	0.024	-0.07	0.089	-0.02	0.73	-0.1	0.11			-1.1	0.094	-0.74	0.49	-0.01	0.44	-0.37	0.62		-0.121464		-0.254101		0.130397		0.263034
AT3G09200	Ribosomal protein L10 family protein	protein_coding				uL10b			1.99929	Protein biosynthesis.cytosolic ribosome.large subunit (LSU).LSU proteome component.RPP0 component	-1.29234	7.13599e-21		0.143277	0.354681	0.0487275	-1.19918	3.83681e-19		-1.24405	-0.04	0.73	0.16	0.29	0.15	0.16	-0.05	0.9			-1.1	0.035	-1.44	0.0015	-0.06	0.35	0.29	0.5		-0.287802		-0.269187		0.108253		0.0896372
AT3G24080	KRR1 family protein	protein_coding								not assigned.not annotated	-0.875282	0.000422756		0.964656	-0.578482	0.0466144	-1.47183	1.08007e-13	-1.20332												-1.08	0.14	-0.21	0.29	0.24	0.28	-0.63	0.071		-0.83399		-0.602665		0.711655		0.480329
AT2G42590	14-3-3 gene. Binds calcium and displays induced structural changes.	protein_coding	GENERAL REGULATORY FACTOR 9 (GRF9)	GENERAL REGULATORY FACTOR 9 (GRF9); (GRF14); (GF14 MU)	GRF9					not assigned.annotated	0.389889	0.00450701		0.789226		0.643621	0.350714	0.00506882			0.02	0.63	-0.22	0	-0.2	0	0.04	0.69			-1.07	0.34	-1.63	0.068	-0.13	0.36	0.44	0.076		0.0657242		-0.366943		-0.456514		-0.0238467
AT1G79530	Encodes one of the chloroplast/plastid localized GAPDH isoforms (GAPCp1/At1g79530 and GAPCp2/At1g16300). gapcp double mutants display a drastic phenotype of arrested root development, dwarfism and sterility. GAPCps are important for the synthesis of serine in roots.	protein_coding	GLYCERALDEHYDE-3-PHOSPHATE DEHYDROGENASE OF PLASTID 1 (GAPCP-1)	GLYCERALDEHYDE-3-PHOSPHATE DEHYDROGENASE OF PLASTID 1 (GAPCP-1)	GAPCP-1					Cellular respiration.glycolysis.plastidial glycolysis.glyceraldehyde 3-phosphate dehydrogenase		0.0529009	1.07256	0.000932875	0.834628	0.0245358	-0.962942	0.00170965			0.04	0.82	0.52	0.03	0.04	0.95	-0.45	0.11			-1.05	0.75	-0.52	0.36	0.51	0.1	-0.02	0.92		-0.411069		-0.246438		-0.132755		-0.297386
AT2G19710	Regulator of Vps4 activity in the MVB pathway protein	protein_coding	IST1-LIKE 5 (ISTL5)	IST1-LIKE 5 (ISTL5)	ISTL5					not assigned.not annotated		0.0518323		0.615418		0.508588	0.485186	0.0409535		1.07997											-1.05	0.87	-1.17	0.58	-0.04	0.27	0.08	0.17		0.369757		-0.475733		-0.369757		0.475733
AT2G38280	Encodes a protein with in vitro AMP deaminase activity that is involved in embryogenesis. Homozygous mutant embryos fail to develop past the zygote stage.	protein_coding	EMBRYONIC FACTOR1 (FAC1)	EMBRYONIC FACTOR1 (FAC1);ADENOSINE 5'-MONOPHOSPHATE DEAMINASE (ATAMPD)	FAC1					Nucleotide metabolism.purines.salvage pathway.AMP deaminase activities.membrane-associated AMP deaminase	-0.719625	0.000585105	0.447502	0.0346676		0.161576	-0.807352	4.35098e-06	-1.09882		-0.21	0.57	0.18	0.1	0.29	0.22	-0.09	0.95			-1.04	0.13	-0.11	0.19	0.48	0.041	-0.46	0.016		-0.141661		-0.675998		-0.392317		0.142019
AT2G03680	The SPR1 gene encodes a plant-specific 12-kD protein which has a repeated motif at both ends, separated by a predicted rod-like domain, suggesting that it may act as an intermolecular linker. Ubiquitously expressed and belongs to a six-member gene family in Arabidopsis; expressed in transgenic seedlings localized to microtubules within the cortical array, preprophase band, phragmoplast, and mitot…	protein_coding	SPIRAL1 (SPR1)	SPIRAL1 (SPR1); (SKU6)	SPR1					Cytoskeleton.microtubular network.microtubule dynamics.SPR1 microtubule-stabilizing factor		0.991139	-0.503249	0.020088	-0.512446	0.0230303		0.989465			0.02	0.97	0.11	0.017	0.07	0.17	-0.02	0.22			-1.04	0.055	-0.1	0.58	0.63	0.36	-0.31	0.17		0.19388		0.558368		0.260152		-0.104337
AT4G10750	Phosphoenolpyruvate carboxylase family protein	protein_coding							2.10009	not assigned.not annotated		0.969162		0.732773		0.506779		0.167311			0.42	0.085	-0.06	0.92	-0.37	0.039	0.1	0.56			-1.04	0.34	-3.75	0.028	-2.21	0.0062	0.5	0.6		0.298967		-0.365284		-0.16319		0.501061
AT1G51510	This gene is predicted to encode a protein involved in the exon junction complex. Though there is a predicted RNA binding motif, in the Drosophila ortholog (33% identity), this motif mediates interactions with Mago and is not available for RNA binding. The Arabidopsis Y14 protein appears to be predominantly nucleolar, but there is also some evidence for its presence in the cytoplasm.	protein_coding	(Y14)	(Y14)	Y14				0.915043	RNA processing.RNA quality control Exon Junction complex (EJC).core components.Y14 component	-0.712203	0.0113792		0.716057		0.0855142		0.24954			0.07	0.87	0.72	0.011	0.7	0.011	0.06	0.35			-1.03	0.12	-0.43	0.21	0.39	0.87	-0.21	0.64		-0.270358		-0.860837		-0.291956		0.298523
AT3G15790	Protein containing methyl-CpG-binding domain.Has sequence similarity to human MBD proteins.	protein_coding	METHYL-CPG-BINDING DOMAIN 11 (MBD11)	(ATMBD11);METHYL-CPG-BINDING DOMAIN 11 (MBD11)	MBD11					not assigned.annotated		0.495063		0.229665		0.223248		0.462335			0.14	0.53	0.39	0.01	-0.13	0.39	-0.38	0.0032			-1.03	0.26	-1.72	0.27	-0.16	0.72	0.52	0.92		0.100402		-0.490635		-0.57289		0.0181473
AT1G53730	STRUBBELIG-receptor family 6	protein_coding	STRUBBELIG-RECEPTOR FAMILY 6 (SRF6)	STRUBBELIG-RECEPTOR FAMILY 6 (SRF6)	SRF6				0.701387	Protein modification.phosphorylation.TKL kinase superfamily.LRR-V kinase		0.0666314		0.601238		0.667386	0.395372	0.0302011													-1.03	0.63	-1.24	0.47	-0.35	0.068	-0.14	0.92		0.103711		-0.365133		-0.0903323		0.378512
AT4G24280	Involved in protein import into chloroplasts during early developmental stages. The mRNA is cell-to-cell mobile.	protein_coding	CHLOROPLAST HEAT SHOCK PROTEIN 70-1 (cpHsc70-1)	CHLOROPLAST HEAT SHOCK PROTEIN 70-1 (cpHsc70-1)	cpHsc70-1				3.78617	External stimuli response.temperature.Hsp (heat-shock-responsive protein) families.Hsp70 family.DnaK protein		0.0738506	0.444382	0.0439088		0.689964	-0.717644	0.000165663			-0.11	0.0032	-0.25	0	-0.13	0.19	0.01	0.59			-1	0.037	-0.08	0.58	0.6	0.36	-0.33	0.46		-0.0518389	-1.05184	-1.05184		-0.403356		0.596644
AT2G28800	member of Chloroplast membrane protein ALBINO3 family. Similar to pea PPF1 and may play a role in plant senescence.	protein_coding	ALBINO 3 (ALB3)	(ABL3);ALBINO 3 (ALB3)	ALB3					Protein translocation.chloroplast.thylakoid membrane SRP insertion system.ALB3 component		0.80551		0.0691071		0.344352		0.327026			0.16	0.43	0.19	0.26	0.17	0.028	0.14	0.055			-1	0.83	-4.12	0.43	1.58	0.043	4.7	0.021		-0.0965733		-0.224123		-0.176878		-0.0493277
AT5G44200	Encodes a nuclear cap-binding protein that forms a heterodimeric complex with ABH1 (ATCBP80) and is likely to participate in RNA metabolism. Its mRNA is ubiquitously expressed.Loss of function mutations suggest a role in processing of pri-miRNA and mRNA splicing.	protein_coding	CAP-BINDING PROTEIN 20 (CBP20)	(ATCBP20);CAP-BINDING PROTEIN 20 (CBP20)	CBP20				1.67417	RNA processing.RNA 5'-end cap adding.CBP80-CBP20 mRNA Cap-Binding complex (CBC).CBP20 component		0.588083		0.446844		0.838589		0.875689			-0.25	0.2	-0.06	0.79	0.13	0.7	-0.06	0.3			-1	0.25	-0.97	0.76	-0.82	0.079	-0.85	0.014		0.184032		-0.444785		-0.482837		0.145979
AT5G52040	Encodes an arginine/serine-rich splicing factor. Transcript is alternatively spliced and is differentially expressed in different tissues (flowers, roots, stems, and leaves) examined. Barta et al (2010) have proposed a nomenclature for Serine/Arginine-Rich Protein Splicing Factors (SR proteins): Plant Cell. 2010, 22:2926. RS41 binds to HYL1 and co-localizes to the nuclear dicing body. Along with …	protein_coding	ARGININE/SERINE-RICH SPLICING FACTOR 41 (RS41)	(ATRSP41);ARGININE/SERINE-RICH SPLICING FACTOR 41 (At-RS41);ARGININE/SERINE-RICH SPLICING FACTOR 41 (RS41)	RS41					RNA processing.RNA splicing.spliceosome-associated non-snRNP factors.RS31/40/41 splicing factor		0.689439		0.215575		0.805659		0.114825													-1	0.032	-0.37	0.19	0.32	0.055	-0.31	0.028		-0.0671142		-0.722466		-0.392317		0.263034
AT2G20050	protein phosphatase 2C and cyclic nucleotide-binding/kinase domain-containing protein	protein_coding								Enzyme classification.EC_2 transferases.EC_2.7 transferase transferring phosphorus-containing group		0.591803		0.271311	-0.351037	0.039903		0.912886													-1	0.63	-1.54	0.44	0.55	0.71	1.09	0.56		-0.150025		-0.667425		-0.14543		0.371969
AT5G60210	Encodes RIP5 (ROP interactive partner 5), a putative Rho protein effector, interacting specifically with the active form of ROPs (Rho proteins of plants).	protein_coding	ROP INTERACTIVE PARTNER 5 (RIP5)	ROP INTERACTIVE PARTNER 5 (RIP5)	RIP5				1.55743	Multi-process regulation.Rop GTPase regulatory system.RIP GTPase interactive protein		0.412091		0.279112		0.551394		0.572188			-0.09	0.094	0.17	0.036	0.12	0.18	-0.15	0.27			-0.99	0.52	-0.74	0.72	0.33	0.14	0.09	0.25		-0.166358	-1.23195	-1.23195		-0.584963		0.480626
AT1G77760	Encodes the cytosolic minor isoform of nitrate reductase (NR). Involved in the first step of nitrate assimilation, it contributes about 15% of the nitrate reductase activity in shoots. Similar to molybdopterin oxidoreductases at the N-terminus, and to FAD/NAD-binding cytochrome reductases at the C-terminus. Cofactors: FAD, heme iron (cytochrome B-557), and molybdenum-pterin.	protein_coding	NITRATE REDUCTASE 1 (NIA1)	NITRATE REDUCTASE 1 (NIA1);NITRATE REDUCTASE 1 (NR1); (GNR1)	NIA1					Nutrient uptake.nitrogen assimilation.nitrate assimilation.nitrate reductase		0.961375		0.0904825		0.33214		0.718842			0	0.85	-0.32	0.00094	-0.31	0.00073	0.01	0.87			-0.99	0.99	-3.78	0.029	-1.55	0.096	1.25	0.45		0.136689		-0.761061		-0.224432		0.673318
AT1G80000	CASC3/Barentsz eIF4AIII binding protein	protein_coding								RNA processing.RNA quality control Exon Junction complex (EJC).core components.CASC3 component		0.558459		0.51852		0.857339	-0.480727	0.0266501													-0.98	0.038	-1.11	0.048	-0.3	0.55	-0.17	0.65		0.388271		-0.563901		-0.305808		0.646363
AT5G35430	Tetratricopeptide repeat (TPR)-like superfamily protein	protein_coding	(NOT10)	(NOT10)	NOT10					not assigned.not annotated		0.165324	0.535356	0.0143166		0.279928	-0.601143	0.00159963													-0.97	0.87	-0.28	0.36	0.38	0.27	-0.31	0.6		-0.204014		-0.878438		-0.226965		0.447459
AT1G23230	Mediator tail subunit, involved in transcriptional regulation.	protein_coding	MEDIATOR 23 (MED23)	MEDIATOR 23 (MED23)	MED23					RNA biosynthesis.RNA polymerase II-dependent transcription.MEDIATOR transcription co-activator complex.tail module.MED23 component	0.484443	0.0176233	0.429883	0.0292629		0.60296		0.70488													-0.96	0.75	-0.7	0.86	-0.02	0.72	-0.28	0.46		0		-0.562595		-0.109229		0.453366
AT5G53620	RNA polymerase II degradation factor	protein_coding							1.4427	not assigned.not annotated	-0.552517	0.00768957		0.75495		0.866453	-0.578097	0.000657775			-0.62	0.27	0.72	0.086	1.16	0.00061	-0.18	0.082			-0.95	0.63	-0.61	0.86	0.98	0.72	0.64	0.92		0.046921		-0.729039		-0.351074		0.424885
AT2G40980	Protein kinase superfamily protein	protein_coding								Enzyme classification.EC_2 transferases.EC_2.7 transferase transferring phosphorus-containing group		0.76685		0.756347		0.921023		0.278218													-0.94	1	-1.16	0.47	0.02	0.72	0.24	0.6		-0.234465		-0.621488		-0.341508		0.0455147
AT2G43160	ENTH/VHS family protein	protein_coding								not assigned.annotated		0.534263		0.703979		0.0859114	-0.338654	0.016697			0.18	0.037	0.19	0.029	-0.08	0.2	-0.1	0.17			-0.93	0.062	-0.72	0.77	0.4	0.38	0.19	0.33		-0.135655		-0.197939		-0.116324		-0.0540398
AT1G72340	NagB/RpiA/CoA transferase-like superfamily protein	protein_coding								Protein biosynthesis.translation initiation.pre-initiation complex (PIC).eIF2B eIF2-GDP recycling complex.eIF2B-alpha		0.86828		0.386423		0.714166	-0.625604	0.0305042													-0.93	0.42	-0.08	0.27	0.04	1	-0.81	0.12		-0.90357		-0.993367		0.30189		0.391687
AT3G45780	Blue-light photoreceptor. Contains a light activated serine-threonine kinase domain and LOV1 and LOV2 repeats. Mutants are defective in blue-light response. Mediates blue light-induced growth enhancements. PHOT1 and PHOT2 mediate blue light-dependent activation of the plasma membrane H+-ATPase in guard cell protoplasts. PHOT1 undergoes blue-light-dependent autophosphorylation. At least eight phos…	protein_coding	PHOTOTROPIN 1 (PHOT1)	PHOTOTROPIN 1 (PHOT1);NONPHOTOTROPIC HYPOCOTYL 1 (NPH1);ROOT PHOTOTROPISM 1 (RPT1); (JK224)	PHOT1				0.4755	External stimuli response.light.UV-A/blue light.phototropin-mediated photoperception.phototropin photoreceptor		0.60014		0.985919	-0.313941	0.0257427		0.105736			0.09	0.47	0.29	0.0027	0.23	0.0074	0.03	0.98			-0.93	0.14	-0.81	0.19	1.26	0.014	1.13	0.038		-0.0412227		-0.792195		-0.269321		0.481652
AT5G53310	myosin heavy chain-like protein	protein_coding							1.10939	not assigned.not annotated	0.583632	0.0247907		0.271311		0.893781	0.848003	4.55114e-05													-0.92	0.2	-0.74	0.36	1.01	0.86	0.83	0.46		0.114643		-0.160465		-0.330721		-0.055614
AT5G63490	CBS / octicosapeptide/Phox/Bemp1 (PB1) domains-containing protein	protein_coding							1.57696	not assigned.annotated		0.848395		0.518781		0.751211		0.576939													-0.92	0.34	-2.08	0.055	0.73	0.74	1.9	0.12		0.333424		-0.0439433		-0.738875		-0.361508
AT4G32330	WDL5 is an target of EIN3 that co-localizes with cortical microtubles. It its thought to function to stabilize microtubles during ethylene induced hypocotyl elongation.	protein_coding	WAVE-DAMPENED 5 (WDL5)	WAVE-DAMPENED 5 (WDL5)	WDL5					Cytoskeleton.microtubular network.microtubule dynamics.WDL microtubule-stabilizing factor		0.739998		0.587799		0.941335		0.962839													-0.92	0.69	-0.16	0.77	0.28	0.71	-0.48	1		0.485427		0.174498		-0.320089		-0.00916
AT1G78150	N-lysine methyltransferase	protein_coding							6.81225	not assigned.not annotated		0.847836		0.923646		0.806107		0.407036			-0.09	0.49	0.1	0.059	0.25	0.0064	0.06	0.48			-0.91	0.43	-1.13	0.055	0.34	0.95	0.56	0.27		-0.277007		-0.277007		-0.0924075		-0.0924075
AT4G30780	ATP-dependent DNA helicase	protein_coding							1.75304	not assigned.not annotated		0.468352		0.738942		0.912842		0.530127													-0.91	0.87	-1.03	0.58	1.61	0.86	1.72	0.53		0.231326		-0.219781		-0.026967		0.42414
AT4G38710	glycine-rich protein	protein_coding								not assigned.annotated	-1.04945	6.87578e-07		0.726871	-0.5315	0.0404505	-1.69462	1.00136e-19	-1.50031	-1.08334	-0.08	0.093	0.17	0.0042	0.12	0.016	-0.14	0.00048			-0.9	0.0027	-0.74	0.021	-0.06	0.86	-0.21	0.54		-0.297386		-0.741688		0.261585		0.705887
AT5G52640	Encodes a cytosolic heat shock protein AtHSP90.1. AtHSP90.1 interacts with disease resistance signaling components SGT1b and RAR1 and is required for RPS2-mediated resistance. The mRNA is cell-to-cell mobile.	protein_coding	HEAT SHOCK PROTEIN 90.1 (HSP90.1)	HEAT SHOCK PROTEIN 81-1 (HSP81-1); (ATHS83); (HSP81.1);HEAT SHOCK PROTEIN 90.1 (HSP90.1);HEAT SHOCK PROTEIN 90.1 (ATHSP90.1);HEAT SHOCK PROTEIN 90-1 (AtHsp90-1);HEAT SHOCK PROTEIN 83 (HSP83)	HSP90.1					External stimuli response.temperature.Hsp (heat-shock-responsive protein) families.Hsp90 family.Hsp90 protein		0.427041		0.185198		0.996387		0.731661	-2.33463		-0.06	0.85	0.03	0.52	0.04	0.73	-0.05	0.23			-0.9	0.45	-0.69	0.81	0.46	0.14	0.26	0.12		-0.0578809	-1.19033	-1.19033		-0.487115		0.645335
AT4G25730	FtsJ-like methyltransferase family protein	protein_coding	TRNA METHYLTRANSFERASE 7B (TRM7B)	(ATTRM7B);TRNA METHYLTRANSFERASE 7B (TRM7B)	TRM7B				1.89399	not assigned.not annotated	-1.83728	1.71966e-09	0.688881	0.0373242		0.0789586	-1.83486	1.1285e-11	-1.87118		-0.19	0.51	0.83	0.045	0.53	0.54	-0.48	0.0051			-0.89	0.39	-0.64	0.47	-0.01	0.86	-0.26	0.024		-0.625934		-0.795859		0.237579		0.407504
AT3G22850	aluminum induced protein with YGL and LRDR motifs	protein_coding							1.2663	not assigned.annotated		0.595739	1.00958	2.24937e-05	0.907421	0.000266736		0.730976		0.414944											-0.89	0.21	0.07	0.52	0.61	0.22	-0.34	0.29		0.064653		-0.439285		-0.771871		-0.267933
AT2G20960	phospholipase-like protein (PEARLI 4) family protein	protein_coding	(pEARLI4)	(pEARLI4)	pEARLI4					not assigned.not annotated	0.507279	0.0246535		0.454357	-0.483432	0.0370863		0.341224		1.46438											-0.88	0.31	-0.66	0.2	0.04	0.83	-0.18	0.55		0.0320612		-0.431339		-0.141472		0.321928
AT1G67900	Phototropic-responsive NPH3 family protein	protein_coding								not assigned.annotated	0.857524	1.72881e-06		0.0851027	-0.567525	0.00298811	0.663149	0.000123435													-0.88	0.89	-0.68	0.77	0.07	0.63	-0.13	0.73		-0.0677446		-0.520257		-0.0139392		0.438573
AT1G67580	Protein kinase superfamily protein	protein_coding	CYCLIN-DEPENDENT KINASE G2 (CDKG2)	CYCLIN-DEPENDENT KINASE G2 (CDKG2)	CDKG2				3.05132	Protein modification.phosphorylation.CMGC kinase superfamily.cyclin-dependent kinase families.CDKG kinase	0.698553	0.00023054		0.307509		0.491988		0.15221	1.02005												-0.88	0.57	-0.68	0.56	1	0.22	0.81	0.56		0.0554951		-0.765535		-0.0414199		0.77961
AT5G61150	Encodes highly hydrophilic protein involved in positively regulating FLC expression. Mutants are early flowering and show a loss of FLC expression in the absence of cold. Member of PAF-C complex.	protein_coding	VERNALIZATION INDEPENDENCE 4 (VIP4)	VERNALIZATION INDEPENDENCE 4 (VIP4)	VIP4				1.40028	RNA biosynthesis.RNA polymerase II-dependent transcription.PAF1C transcription initiation and elongation complex.VIP4/LEO1 component		0.237432		0.162896		0.876506		0.889999													-0.88	0.48	-0.43	0.15	0.26	0.47	-0.19	0.055		-0.146841		-0.838719		-0.392317		0.29956
AT2G37550	A member of ARF GAP domain (AGD), A thaliana has 15 members, grouped into four classes.	protein_coding	ARF-GAP DOMAIN 7 (AGD7)	ARF-GAP DOMAIN 7 (AGD7);YEAST PDE1 SUPPRESSOR 1 (ASP1)	AGD7					Vesicle trafficking.Coat protein I (COPI) coatomer machinery.ARF-GTPase-activating (ARF-GAP) activities.class II ARF-GAP protein	-0.585565	0.0140413		0.184172		0.059745	-0.42575	0.0266096													-0.87	0.38	0.31	0.15	0.79	0.19	-0.39	0.35		-0.0300572		-0.577545		-0.409984		0.137504
AT5G20360	Encodes one of the 36 carboxylate clamp (CC)-tetratricopeptide repeat (TPR) proteins (Prasad 2010, Pubmed ID: 20856808) with potential to interact with Hsp90/Hsp70 as co-chaperones.	protein_coding	PHOX3 (Phox3)	PHOX3 (Phox3)	Phox3				2.98557	Cytoskeleton.microfilament network.myosin microfilament-based motor protein activities.MadB myosin adaptor protein	-0.664768	0.00606192		0.302062		0.18164	-0.551177	0.0040628													-0.87	0.6	0.41	0.32	0.74	0.056	-0.54	0.82		-0.285402	-1.03747	-1.03747		-0.415037		0.337035
AT1G47970	nucleolin	protein_coding								not assigned.not annotated		0.594796		0.754071		0.622641		0.694063			0.35	0.26	0.67	0.045	0.28	0.068	-0.05	0.46			-0.87	0.00046	-1.3	0	-0.41	0.43	0.03	0.28		0.371969		-0.0106472		-0.29956		0.0830557
AT4G28980	Encodes a CDK-activating kinase that regulates root initial cell differentiation. Phosphorylates CDKD2 and CDKD3, but not CDKD1. Controls CDK activities and basal transcription.	protein_coding	CDK-ACTIVATING KINASE 1AT (CAK1AT)	CDK-ACTIVATING KINASE 1AT (CAK1AT);CYCLIN-DEPENDENT KINASE F;1 (CDKF;1)	CAK1AT					Protein modification.phosphorylation.CMGC kinase superfamily.cyclin-dependent kinase families.CDKF/CDK20 kinase		0.960205		0.914546		0.568115		0.414161			-0.11	0.35	-0.07	0.44	-0.08	0.49	-0.12	0.42			-0.87	0.87	0.31	0.47	0.82	0.86	-0.36	0.35		-0.21818		-0.510962		-0.0297473		0.263034
AT1G67590	Remorin family protein	protein_coding							1.00088	not assigned.not annotated		0.189577		0.962632		0.614488		0.525055													-0.87	0.26	-0.2	1	0.63	0.068	-0.04	0.46		0.304855		-0.5025		0.167378		0.974733
AT3G57150	Encodes a putative pseudouridine synthase (NAP57).	protein_coding	HOMOLOGUE OF NAP57 (NAP57)	HOMOLOGUE OF NAP57 (NAP57); (AtCBF5); (CBF5); (AtNAP57)	NAP57				3.12546	RNA processing.RNA modification.pseudouridylation.H/ACA small nucleolar ribonucleoprotein (snoRNP) RNA pseudouridylation complex.Nap57/CBF5 pseudouridine synthase component	-1.58754	3.72305e-07	0.909209	0.00554317	0.837066	0.0244212	-1.65969	4.95424e-09	-2.11309	-1.42057	0.21	0.0046	0.34	0	0.13	0.99	0	0.42			-0.86	0.66	-0.07	0.92	1.32	0.018	0.53	0.083	-1.01707	-1.01707	-1.365	-1.365		0.0506261		0.398549
AT3G07880	RhoGTPase GDP dissociation inhibitor (RhoGDI) that spatially restricts the sites of growth to a single point on the trichoblast. It regulates the NADPH oxidase RHD2/AtrbohC, which is required for hair growth.	protein_coding	SUPERCENTIPEDE1 (SCN1)	SUPERCENTIPEDE1 (SCN1)	SCN1				1.60161	Multi-process regulation.Rop GTPase regulatory system.RopGDI guanine nucleotide dissociation inhibitor		0.258246		0.265388		0.591889	0.382772	0.0464836			-0.06	0.31	0.03	0.69	0.09	0.34	0.01	0.9			-0.86	0.51	-1.36	0.44	0.29	0.37	0.79	0.49		-0.295456		0.161589		0.161155		-0.29589
AT1G17370	Encodes an RNA?binding protein involved in stress granule formation. Regulated by a transposable element small RNA.	protein_coding	OLIGOURIDYLATE BINDING PROTEIN 1B (UBP1B)	OLIGOURIDYLATE BINDING PROTEIN 1B (UBP1B)	UBP1B				1.04916	not assigned.annotated		0.876857		0.587112		0.41592		0.604985			-0.04	0.88	-0.03	0.46	-0.11	0.66	-0.12	0.7			-0.86	0.75	0.26	0.72	0.48	0.58	-0.64	0.17		0		-0.418829		-0.449526		-0.0306968
AT1G21630	TPLATE Adaptor complex subunit.	protein_coding	ARABIDOPSIS THALIANA EH DOMAIN CONTAINING PROTEIN 2 (ATEH2)	ARABIDOPSIS THALIANA EH DOMAIN CONTAINING PROTEIN 2 (ATEH2)	ATEH2				2.09307	Vesicle trafficking.clathrin coated vesicle (CCV) machinery.TPLATE AP-2 co-adaptor complex.EH component		0.37071		0.111478	-0.380852	0.0100557	-0.301377	0.0241004			0.09	0.59	0.24	0.014	0.16	0.19	0.01	0.72			-0.86	0.31	-0.65	0.31	0.25	0.49	0.04	0.39		0.219313		-0.111893		0.08092		0.412126
AT5G18570	Encodes AtObgC, a plant ortholog of bacterial Obg. AtObgC is a chloroplast-targeting GTPase essential for early embryogenesis. Mutations in this locus result in embryo lethality. The protein is dually localized in the stroma and the inner envelope membrane and is involved in thylakoid membrane biogenesis and functions primarily in plastid ribosome biogenesis during chloroplast development.	protein_coding	EMBRYO DEFECTIVE 269 (EMB269)	CHLOROPLASTIC SAR1 (CPSAR1);EMBRYO DEFECTIVE 3138 (EMB3138); (ATOBGC); (OBG A-2);EMBRYO DEFECTIVE 269 (EMB269);OBG-LIKE PROTEIN (ATOBGL)	EMB269					not assigned.annotated		0.559709		0.420006		0.989221		0.0509289		-1.27308	0.14	0.47	-0.13	0.5	-0.13	0.21	0.14	0.087			-0.86	0.42	-0.93	0.83	0.39	0.16	0.46	0.61		-0.0780025		-0.908078		-0.120076		0.709999
AT4G39330	cinnamyl alcohol dehydrogenase 9	protein_coding	CINNAMYL ALCOHOL DEHYDROGENASE 9 (CAD9)	CINNAMYL ALCOHOL DEHYDROGENASE 9 (CAD9); (ATCAD9)	CAD9				1.45697	Enzyme classification.EC_1 oxidoreductases.EC_1.1 oxidoreductase acting on CH-OH group of donor	-0.444182	0.0153051	0.514379	0.00302038	0.461739	0.0137049	-0.496823	0.00239751	-2.16525	-2.30071	-0.11	0.2	0.17	0.12	0.33	0.058	0.04	0.42			-0.85	0.26	-0.77	0.58	0.32	0.045	0.24	0.12		0.271302		-0.536053		-0.544321		0.263034
AT5G41100	hydroxyproline-rich glycoprotein family protein	protein_coding							1.30012	not assigned.annotated	0.705381	0.0263265		0.164574	-0.828071	0.00530834		0.271409		1.99399											-0.85	0.77	-18.85	0.01	0.81	0.9	18.81	0.013		-0.0766213		-0.5542		0.167008		0.644586
AT5G58040	Encodes a subunit of the polyadenylation apparatus that interacts with and stimulates the activity of poly(A) polymerase. Additionally , it interacts with several polyadenylation factor subunits and is an RNA-binding protein. It is suggested that this protein coordinates a number of polyadenylation factor subunits with PAP and with RNA. The mRNA is cell-to-cell mobile.	protein_coding	HOMOLOG OF YEAST FIP1 [V] (FIP1[V])	HOMOLOG OF YEAST FIP1 [V] (ATFIP1[V]); (FIPS5); (FIP1);HOMOLOG OF YEAST FIP1 [V] (FIP1[V]); (ATFIPS5)	FIP1[V]				1.09891	RNA processing.RNA 3'-end polyadenylation.Cleavage and Polyadenylation Specificity Factor (CPSF) complex.Fip1 component		0.761192	0.451456	0.0411703		0.933007	-0.519362	0.00793734			0.07	0.75	0.3	0.29	0.47	0.066	0.25	0.088			-0.84	0.05	-0.74	0.47	0.9	0.26	0.8	0.45		-0.647119	-1.42084	-1.42084		-0.301656		0.472068
AT3G13570	encodes an SC35-like splicing factor of 30 kD that is localized to the nuclear specks. Barta et al (2010) have proposed a nomenclature for Serine/Arginine-Rich Protein Splicing Factors (SR proteins): Plant Cell. 2010, 22:2926.	protein_coding	SC35-LIKE SPLICING FACTOR 30A (SCL30A)	SC35-LIKE SPLICING FACTOR 30A (At-SCL30A);SC35-LIKE SPLICING FACTOR 30A (SCL30A)	SCL30A					RNA processing.RNA splicing.spliceosome-associated non-snRNP factors.SCL28/30/33 splicing factor		0.518565		0.382287		0.055963	-0.570473	0.0436449	-1.15692												-0.84	0.7	-0.33	0.32	0.45	0.16	-0.06	0.26		-0.173829		-0.520154		-0.197681		0.148644
AT3G28920	homeobox protein 34	protein_coding	HOMEOBOX PROTEIN 34 (HB34)	HOMEOBOX PROTEIN 34 (AtHB34);ZINC FINGER HOMEODOMAIN 9 (ZHD9);HOMEOBOX PROTEIN 34 (HB34)	HB34				2.4246	RNA biosynthesis.transcriptional activation.HB (Homeobox) superfamily.zf-HD transcription factor		0.36749		0.436815		0.33347		0.134022		-1.2344											-0.84	0.6	-1.03	0.6	0.42	0.088	0.6	0.3		0.602158		0.707607		0.323295		0.217846
AT3G05420	Acyl-CoA binding protein with high affinity for oleoyl-CoA. Expressed in all plant organs. Involved in fatty acid transport.	protein_coding	ACYL-COA BINDING PROTEIN 4 (ACBP4)	(ATACBP4);ACYL-COA BINDING PROTEIN 4 (ACBP4)	ACBP4				1.21835	not assigned.annotated	-0.663029	0.000584046	0.431262	0.0216705		0.315822	-0.838675	5.03578e-08			-0.03	0.73	0.02	0.53	-0.04	0.61	-0.1	0.14			-0.83	0.33	-1.22	0.25	-0.24	0.94	0.15	0.95		-0.425926		-0.629018		-0.0519278		0.151164
AT4G28200	U3 small nucleolar RNA-associated-like protein	protein_coding							1.08815	Protein biosynthesis.cytosolic ribosome.small subunit (SSU).SSU processome.UPT6 assembly factor	-0.71545	0.0240245	0.68653	0.0157981		0.480139	-1.10509	4.59922e-06													-0.83	0.26	-0.33	0.47	0.24	0.1	-0.25	0.25		-0.722466		-0.940057		0.0426443		0.260236
AT1G66840	Encodes a coiled-coil protein WEB2 (weak chloroplast movement under blue light 2, also named PMI2/plastid movement impaired 2). Involved in chloroplast avoidance movement under intermediate and high light intensities. WEB2, together with another coiled-coil protein WEB1 (AT2G26570), maintains the chloroplast photorelocation movement velocity.	protein_coding	PLASTID MOVEMENT IMPAIRED 2 (PMI2)	WEAK CHLOROPLAST MOVEMENT UNDER BLUE LIGHT 2 (WEB2);PLASTID MOVEMENT IMPAIRED 2 (PMI2)	PMI2					Cytoskeleton.cp-actin-dependent plastid movement.WEB1-PMI2 cp-actin filament reorganisation complex.PMI2 component	0.75035	0.0171322		0.628108		0.15749		0.89051		-1.08202											-0.83	0.42	-6.25	0.14	-1.56	0.47	3.86	0.75		-0.704176	-1.5652	-1.5652		-0.464506		0.396517
AT3G04580	Ethylene receptor, subfamily 2. Has serine kinase activity.	protein_coding	ETHYLENE INSENSITIVE 4 (EIN4)	ETHYLENE INSENSITIVE 4 (EIN4)	EIN4				1.32635	Phytohormones.ethylene.perception and signal transduction.ETR/ERS-type receptor protein	-0.566565	0.0336115		0.37678	0.557192	0.0365754		0.288099													-0.82	0.94	-3.06	0.47	1.96	0.47	4.19	0.076		0.492396		-0.328054		-0.529549		0.290901
AT1G72150	novel cell-plate-associated protein that is related in sequence to proteins involved in membrane trafficking in other eukaryotes The mRNA is cell-to-cell mobile.	protein_coding	PATELLIN 1 (PATL1)	PATELLIN 1 (PATL1)	PATL1				3.08617	not assigned.annotated		0.790916	-0.461122	0.00361382	-0.558865	0.000341866		0.901663			-0.24	0.13	-0.12	0.0045	0.11	0.048	-0.02	0.34			-0.81	0.44	-0.84	0.057	-0.21	0.023	-0.18	0.59		0.00712443		-0.528928		-0.347923		0.18813
AT5G13850	nascent polypeptide-associated complex subunit alpha-like protein 3	protein_coding	NASCENT POLYPEPTIDE-ASSOCIATED COMPLEX SUBUNIT ALPHA-LIKE PROTEIN 3 (NACA3)	NASCENT POLYPEPTIDE-ASSOCIATED COMPLEX SUBUNIT ALPHA-LIKE PROTEIN 3 (NACA3)	NACA3					Protein modification.protein folding and quality control.NAC ribosome-associated chaperone complex.alpha subunit	-0.4369	0.0308415		0.949397		0.98261	-0.408289	0.0146647			-0.05	0.73	0.53	0	0.48	0.00087	-0.1	0.31			-0.8	0.53	-0.9	0.36	0.22	0.36	0.31	0.13		-0.355875		-0.444412		-0.0885367		0
AT2G32120	heat-shock protein 70T-2	protein_coding	HEAT-SHOCK PROTEIN 70T-2 (HSP70T-2)	HEAT-SHOCK PROTEIN 70T-2 (HSP70T-2)	HSP70T-2					External stimuli response.temperature.Hsp (heat-shock-responsive protein) families.Hsp70 family.DnaK protein		0.0653239		0.890991		0.84083		0.119914			-0.01	0.97	-0.23	0.0011	0.02	0.3	0.24	0.05			-0.8	0.85	-0.93	0.23	-0.46	0.34	-0.32	0.78						0.385493
AT3G04840	Ribosomal protein S3Ae	protein_coding				eS1a			1.95965	Protein biosynthesis.cytosolic ribosome.small subunit (SSU).SSU proteome.RPS3a component	-1.15588	4.75292e-15		0.434457		0.113785	-1.00797	2.22494e-12	-1.16176	-1.45709	-0.18	0.07	0.02	0.88	0.18	0.13	-0.02	0.54			-0.79	0.55	-1.04	0.16	-0.35	0.33	-0.1	0.83		-0.0807313		-0.177305		-0.200078		-0.103505
AT1G26110	Encodes Decapping 5, required for mRNA decapping, P-body formation and translational repression during postembryonic development.	protein_coding	DECAPPING 5 (DCP5)	DECAPPING 5 (DCP5)	DCP5					RNA processing.RNA decay.deadenylation-dependent mechanism.mRNA decapping complex.DCP5 regulatory component		0.655008		0.195315	-0.382253	0.0141307		0.0720381			0.11	0.15	0.38	0.0083	0.23	0.62	-0.03	0.96			-0.79	0.91	-0.37	0.13	-0.09	0.24	-0.51	0.5		-0.10257		-0.280108		0.130584		0.308122
AT3G17650	Arabidopsis thaliana metal-nicotianamine transporter YSL5	protein_coding	YELLOW STRIPE LIKE 5 (YSL5)	PIGMENT DEFECTIVE 321 (PDE321);YELLOW STRIPE LIKE 5 (YSL5)	YSL5				1.39691	Nutrient uptake.iron uptake.chelation-based strategy uptake.YSL-type Fe(III)-chelator transporter		0.332692		0.488223		0.121753		0.778965													-0.79	0.87	-0.46	0.36	0.21	0.47	-0.12	0.25		0.180572		-0.500898		-0.280108		0.401363
AT4G35800	Encodes the unique largest subunit of nuclear DNA-dependent RNA polymerase II; the ortholog of budding yeast RPB1 and a homolog of the E. coli RNA polymerase beta prime subunit.	protein_coding	RNA POLYMERASE II LARGE SUBUNIT (NRPB1)	RNA POLYMERASE II LARGE SUBUNIT (NRPB1);RNA POLYMERASE II LARGE SUBUNIT (RNA_POL_II_LS); (RNA_POL_II_LSRNA_POL_II_LS);RNA POLYMERASE II LARGE SUBUNIT (RPB1)	NRPB1					RNA biosynthesis.DNA-dependent RNA polymerase (Pol) complexes.Pol II catalytic subunits.subunit 1		0.784907		0.379601		0.575337		0.161494			-0.04	0.97	-0.12	0.25	0.24	0.94	0.31	0.19			-0.79	0.69	-1.13	0.84	0.56	0.88	0.89	1		-0.197037		-0.969626		-0.207805		0.564785
AT3G01160	pre-rRNA-processing ESF1-like protein	protein_coding							1.20357	not assigned.not annotated	-1.03294	0.00904972		0.0505868		0.708858	-1.53376	7.06156e-07	-1.65046												-0.77	0.72	0.14	0.19	0.07	0.7	-0.84	0.025		-0.246438	-1.08597	-1.08597		-0.341508		0.498027
AT4G02450	Encodes one of two isoforms of a co-chaperone of HSP90 that is required for root growth, in particular in the maintenance of the root meristem.	protein_coding	(P23-1)	(P23-1)	P23-1					External stimuli response.temperature.Hsp (heat-shock-responsive protein) families.Hsp90 family.P23 Hsp90-co-chaperone		0.242867		0.141698		0.102321		0.0863505			0.18	0.26	0.02	0.39	-0.03	0.84	0.13	0.45			-0.77	0.085	-1.29	0.00013	-0.31	0.023	0.21	0.092		0.311944		0.258883		-0.0888411		-0.0357798
AT4G35240	DNA-directed RNA polymerase subunit beta, putative (DUF630 and DUF632)	protein_coding								not assigned.annotated		0.200967		0.649063		0.194564		0.580115													-0.77	0.75	0.07	0.36	0.97	0.27	0.14	0.6		-0.137504		-0.520832		-0.17897		0.204358
AT3G61050	Encodes a novel transcriptional regulator, a calcium-dependent lipid-binding protein containing a C2 domain, that binds specifically to the promoter of THAS1 (thalianol synthase 1). It can bind ceramide and is involved in drought and salt tolerance.	protein_coding	(NTMC2T4)	CALCIUM-DEPENDENT LIPID-BINDING PROTEIN (AtCLB); (NTMC2T4); (NTMC2TYPE4)	NTMC2T4				1.96135	not assigned.annotated		0.715944		0.790907		0.978685		0.411914			0.04	0.4	0.4	0.0011	0.38	0.15	0.02	0.56			-0.77	0.76	-0.87	0.96	-0.66	0.25	-0.56	0.42		0.276654		-0.450661		-0.539688		0.187627
AT4G37870	Encodes a phosphoenolpyruvate carboxykinase that localizes to the cytosol.	protein_coding	PHOSPHOENOLPYRUVATE CARBOXYKINASE 1 (PCK1)	PHOSPHOENOLPYRUVATE CARBOXYKINASE 1 (PCK1);PHOSPHOENOLPYRUVATE CARBOXYKINASE (PEPCK)	PCK1					Carbohydrate metabolism.gluconeogenesis.phosphoenolpyruvate carboxykinase		0.458351	1.27281	2.0205e-10	1.13145	4.43615e-08		0.803818	1.34617		-0.04	0.097	0.5	0	0.44	0	-0.11	0.015			-0.77	0.00086	0.14	0.48	0.9	0	-0.01	0.54		0.0331669		-0.801774		-0.437064		0.397877
AT4G28080	Encodes REDUCED CHLOROPLAST COVERAGE 2 (REC2). Along with REC1 and REC3 it contributes to establishing the size of the chloroplast compartment.	protein_coding	REDUCED CHLOROPLAST COVERAGE 2 (REC2)	REDUCED CHLOROPLAST COVERAGE 2 (REC2)	REC2					not assigned.annotated		0.953604	-0.362651	0.0154239	-0.744273	3.34523e-08	-0.397662	0.00438534			-0.05	0.83	0.02	0.53	0.09	0.58	0.03	0.95			-0.75	0.00053	-1.5	0	-0.34	0.00072	0.42	0.095		-0.0885367		-0.719892		-0.237692		0.393664
AT5G42950	EXA1 is a GYF domain-containing gene of the SMY2 subgroup. Mutants exhibit resistance to potexviruses.	protein_coding	ESSENTIAL FOR POTEXVIRUS ACCUMULATION 1 (EXA1)	ESSENTIAL FOR POTEXVIRUS ACCUMULATION 1 (EXA1)	EXA1				6.22177	not assigned.not annotated		0.372852		0.962489	-0.508683	0.000617266	-0.693129	4.5833e-08			0.04	0.71	-0.13	0.12	-0.07	0.62	0.09	0.14			-0.75	0.36	-0.81	0.57	-0.18	0.31	-0.12	0.5		-0.298523		-0.858824		-0.0166787		0.543622
AT1G72160	Sec14p-like phosphatidylinositol transfer family protein	protein_coding	(PATL3)	(PATL3)	PATL3				0.449205	not assigned.annotated		0.695589		0.207418		0.678761		0.896626			-0.13	0.61	0.36	0.15	0.29	0.33	-0.2	0.24			-0.74	0.75	-2.65	0.2	-0.58	0.58	1.33	0.46		-0.26939		-0.54201		-0.255411		0.0172093
AT4G32410	Encodes a cellulose synthase isomer. CESA1 mutants have cellulose defect in the primary cell wall. Multiple lines of evidence suggest that CESA1, along with CESA3 and CESA6 are present in the same plasma membrane complex for cellulose biosynthesis. lasma membrane complex for cellulose biosynthesis. As inferred from the null role of secondary wall-type CesAs, included in a set of five primary wall…	protein_coding	CELLULOSE SYNTHASE 1 (CESA1)	ANISOTROPY1 (ANY1);CELLULOSE SYNTHASE 1 (AtCESA1);RADIALLY SWOLLEN 1 (RSW1);CELLULOSE SYNTHASE 1 (CESA1)	CESA1				1.09124	Cell wall.cellulose.synthesis.cellulose synthase complex (CSC).CSC components.CesA-type catalytic component		0.630384		0.583057		0.895696		0.831			0.39	0.25	1.32	0.0021	0.97	0.015	0.05	0.82			-0.74	0.57	0.06	0.23	0.74	0.067	-0.05	0.51		0.0331669		-0.360176		-0.10188		0.291463
AT5G07120	Encodes sorting nexin SNX2b. SNX2b is peripherally associated with membranes. Involved in vesicular trafficking from endosomes to the vacuole.	protein_coding	SORTING NEXIN 2B (SNX2b)	SORTING NEXIN 2B (SNX2b)	SNX2b					Vesicle trafficking.endomembrane trafficking.protein recycling.Retromer protein recycling complex.SNX2 component		0.302796		0.534196		0.700862		0.27495													-0.73	0.63	-0.55	0.86	-0.14	0.86	-0.32	0.25		0.0703893		-0.678072		-0.551015		0.197446
AT1G15280	CASC3/Barentsz eIF4AIII binding protein	protein_coding							1.09632	RNA processing.RNA quality control Exon Junction complex (EJC).core components.CASC3 component		0.506855		0.928423		0.538914		0.946686													-0.73	0.48	-0.1	0.26	0.08	0.73	-0.55	0.044		0.328054		-0.306661		-0.037153		0.597563
AT1G69510	cAMP-regulated phosphoprotein 19-related protein	protein_coding							0.970377	not assigned.not annotated		0.760816		0.22341		0.0993412		0.382889			0.21	1	0.18	0.81	-0.04	0.83	0	0.83			-0.72	0.34	-2.48	0.045	-2.26	0.0062	-0.5	0.46		-0.195551		0.325986		0.0901978		-0.431339
AT4G22140	Encoding a chromatin remodeling factor that regulates flowering time.	protein_coding	EARLY BOLTING IN SHORT DAYS (EBS)	EARLY BOLTING IN SHORT DAYS (EBS)	EBS				2.87551	Chromatin organisation.histone modifications.histone deacetylation.SHL1 histone deacetylation complex recruiting protein		0.93584		0.78874		0.58044		0.84502													-0.72	0.82	0.43	0.3	1.49	0.013	0.34	0.082		0.0886576		-0.304257		-0.0785334		0.314381
AT1G69200	Encodes a fructokinase-like protein (AT3G54090/FLN1, AT1G69200/FLN2), a member of the pfkB-carbohydrate kinase family. FLN1 and FLN2 are potential plastidial thioredoxin z (TRX z) targets. Mutants display mutant chloroplast development, general plant growth and development defects and defects in PEP-dependent transcription. The mRNA is cell-to-cell mobile.	protein_coding	FRUCTOKINASE-LIKE 2 (FLN2)	FRUCTOKINASE-LIKE 2 (FLN2)	FLN2					RNA biosynthesis.organelle machineries.RNA polymerase activities.plastid-encoded RNA polymerase (PEP) complex.essentiell co-factors.FLN2 regulatory factor	-0.528609	0.0153488	0.68279	0.000116717		0.162626	-0.86929	1.36383e-08	-1.53465		0.16	0.13	0.02	0.51	-0.07	0.81	0.07	0.54			-0.71	0.63	-0.21	0.85	0.2	0.43	-0.3	0.25		-0.321928	-1.29956	-1.29956		-0.573735		0.403897
AT2G28390	SAND family protein	protein_coding	MONENSIN SENSITIVITY1 (MON1)	MONENSIN SENSITIVITY1 (MON1)	MON1					Vesicle trafficking.regulation of membrane tethering and fusion.RAB-GTPase guanine nucleotide exchange factor (RAB-GEF) activities.MON1-CCZ1 RAB7 guanine nucleotide exchange factor complex.MON1/SAND component		0.599456		0.864018		0.791583		0.975052													-0.71	0.17	-0.35	0.85	0.44	0.1	0.09	0.49		0.180572		-0.473931		-0.466876		0.187627
AT5G13560	structural maintenance of chromosomes protein	protein_coding							1.76297	not assigned.not annotated		0.476477		0.310814		0.892128		0.987406			-0.25	0.28	0.34	0.56	0.88	0.05	0.29	0.56			-0.71	0.53	0.08	0.69	-0.51	0.41	-1.3	0.082		0.0421255		-0.584963		-0.35739		0.269698
AT3G55460	encodes an SC35-like splicing factor that is localized to nuclear specks. Barta et al (2010) have proposed a nomenclature for Serine/Arginine-Rich Protein Splicing Factors (SR proteins): Plant Cell. 2010, 22:2926. The mRNA is cell-to-cell mobile.	protein_coding	SC35-LIKE SPLICING FACTOR 30 (SCL30)	SC35-LIKE SPLICING FACTOR 30 (SCL30);SC35-LIKE SPLICING FACTOR 30 (At-SCL30)	SCL30				1.26557	RNA processing.RNA splicing.spliceosome-associated non-snRNP factors.SCL28/30/33 splicing factor		0.669763		0.403386		0.195285		0.926592			0.04	0.73	0.06	0.31	0.06	0.3	0.05	0.87			-0.7	0.31	-0.59	0.7	-0.01	0.24	-0.12	0.66		-0.327575		-0.29956		0.166778		0.138764
AT5G53440	LOW protein: zinc finger CCCH domain protein	protein_coding							2.96894	not assigned.not annotated		0.388964		0.305761		0.118002	-0.444838	0.0485581													-0.7	0.14	-0.32	0.36	0.58	0.23	0.2	0.74		-0.0274807	-1.02748	-1.02748		0	1	1
AT4G15020	hAT transposon superfamily	protein_coding							2.06396	not assigned.not annotated		0.64342	0.523085	0.0296992		0.45689		0.684506													-0.69	0.89	-2.14	0.18	-0.54	0.56	0.91	0.16		0.150417		-0.70044		-0.581396		0.269461
AT1G29530	hypothetical protein	protein_coding							0.69403	not assigned.not annotated		0.972056		0.398809		0.981628		0.413749													-0.69	0.83	-1.39	0.25	0.11	0.96	0.81	0.16		0.387023		-0.718587	-1.00851	-1.00851		0.0970987
AT3G48500	Nucleic acid-binding, OB-fold-like protein	protein_coding	PIGMENT DEFECTIVE 312 (PDE312)	PLASTID TRANSCRIPTIONALLY ACTIVE 10 (PTAC10);PIGMENT DEFECTIVE 312 (PDE312); (TAC10)	PDE312				2.82959	RNA biosynthesis.organelle machineries.RNA polymerase activities.plastid-encoded RNA polymerase (PEP) complex.essentiell co-factors.PAP3/TAC10 component	-0.64727	0.0135993	0.682124	0.00360719	0.547465	0.0490162	-0.78193	0.000189827			-0.06	0.71	0.15	0.0092	0.15	0.25	-0.07	0.5			-0.68	0.25	-1.12	0.016	0.24	0.96	0.69	0.022		-0.442005	-1.21573	-1.21573		-0.310068		0.463656
AT5G63550	DEK domain-containing chromatin associated protein	protein_coding							1.02424	not assigned.not annotated	-0.583997	0.0231679		0.79045		0.968154	-0.654081	0.000797263			0.14	0.24	0.5	0.00021	0.25	0.004	-0.11	0.14			-0.68	0.72	-0.42	0.98	0.63	0.29	0.37	0.1		0.242361		-0.335184		-0.342525		0.23502
AT3G43300	AtMIN7 is an immunity associated Arabidopsis protein targeted by HopM1, a conserved Pseudomonas syringae virulence protein. AtMIN7 encodes one of the eight members of the Arabidopsis adenosine diphosphate (ADP) ribosylation factor (ARF) guanine nucleotide exchange factor (GEF) protein family. The AFR GEF proteins are key components of the vesicle trafficking system in eukaryotic cells. HopM1 medi…	protein_coding	HOPM INTERACTOR 7 (ATMIN7)	HOPM INTERACTOR 7 (ATMIN7);BREFELDIN A-INHIBITED GUANINE NUCLEOTIDE-EXCHANGE PROTEIN 5 (BIG5); (MIN7);BFA-VISUALIZED ENDOCYTIC TRAFFICKING DEFECTIVE1 (BEN1)	ATMIN7					Vesicle trafficking.Coat protein I (COPI) coatomer machinery.ARF-GTPase guanyl-nucleotide exchange factor (ARF-GEF) activities.BIG-type ARF-GEF factor		0.830686	0.451778	0.000143992		0.0758044	-0.2429	0.0467909			0.02	0.7	0.06	0.32	0.11	0.084	0.07	0.21			-0.68	0.86	-1	0.23	0.62	0.64	0.94	0.071		-0.14505		-0.779401		-0.540568		0.0937821
AT1G80930	MIF4G domain-containing protein / MA3 domain-containing protein	protein_coding								not assigned.not annotated		0.473162		0.0834594		0.888958	-0.827147	0.000550941													-0.68	0.45	-0.63	0.64	0.74	0.024	0.69	0.022		-0.346803	-1.54844	-1.54844		-0.404621		0.797013
AT3G53460	Encodes a nuclear gene with a consensus RNA-binding domain that is localized to the chloroplast.	protein_coding	CHLOROPLAST RNA-BINDING PROTEIN 29 (CP29)	CHLOROPLAST RNA-BINDING PROTEIN 29 (CP29)	CP29				1.85578	not assigned.annotated	-1.96205	2.3957e-37		0.307294		0.123905	-1.84304	9.73938e-37		-1.77651	-0.02	0.44	0.27	0.00014	0.29	0.001	-0.01	0.43			-0.67	0.2	-0.6	0.36	-0.62	0.1	-0.7	0.076		-0.0752881		-0.578862		-0.0458037		0.45777
AT5G10950	Tudor/PWWP/MBT superfamily protein	protein_coding							0.52511	not assigned.not annotated		0.990821		0.286933		0.546409		0.789905			0.04	0.75	0.25	0.29	0.13	0.52	-0.07	0.92			-0.67	0.82	-0.7	0.29	-0.05	0.6	-0.02	0.82		-0.611729	-1.11018	-1.11018		-0.398918		0.0995357
AT3G27390	transmembrane protein	protein_coding								not assigned.annotated		0.943671		0.541467	0.379123	0.0199689		0.120643													-0.67	0.64	0.38	0.15	0.97	0.012	-0.07	0.88		0.208814		-0.487794		-0.432192		0.264416
AT2G32730	26S proteasome regulatory complex, non-ATPase subcomplex, Rpn2/Psmd1 subunit	protein_coding								Protein degradation.26S proteasome.regulatory particle.non-ATPase subunits.RPN2 regulatory component		0.760727	0.430805	0.0148494		0.236081		0.161186			-0.09	0.97	-0.03	0.67	0.08	0.99	0.03	0.62			-0.65	0.61	-0.8	0.41	0.32	0.22	0.47	0.79		-0.216037		-0.683816		-0.247581		0.220198
AT2G25670	hypothetical protein	protein_coding								not assigned.not annotated	-1.01995	1.98275e-07		0.0859742		0.105358	-0.986751	7.10109e-09			-0.06	0.7	0.26	0.089	0.38	0.027	0.06	0.95			-0.63	0.75	-1.27	0.2	-0.34	0.86	0.3	0.35		-0.0262315		-0.794416		-0.49206		0.276124
AT5G47480	RGPR-like protein	protein_coding	MAIGO 5 (MAG5)	MAIGO 5 (MAG5)	MAG5				2.75505	Vesicle trafficking.Coat protein II (COPII) coatomer machinery.Sec16 Sar1-GTPase-regulating protein		0.923014		0.0691071		0.731962	-0.432678	0.0128935													-0.63	0.12	0.12	0.24	0.71	0.016	-0.04	0.57		-0.147557		-0.884523		-0.0450879		0.691878
AT1G26170	ARM repeat superfamily protein	protein_coding								Protein translocation.nucleus.nucleocytoplasmic transport.karyopherin beta transport receptors.IMB5 import karyopherin		0.0503554		0.761657		0.996086	-0.62996	0.00193159			-0.25	0.39	0.28	0.086	0.4	0.11	-0.13	0.36			-0.62	0.42	-0.78	0.36	-0.02	0.58	0.14	0.076		-0.166358		-0.876852		-0.36257		0.347923
AT3G51850	member of Calcium Dependent Protein Kinase The mRNA is cell-to-cell mobile.	protein_coding	CALCIUM-DEPENDENT PROTEIN KINASE 13 (CPK13)	CALCIUM-DEPENDENT PROTEIN KINASE 13 (CPK13)	CPK13				3.7306	Protein modification.phosphorylation.CAMK kinase superfamily.CDPK kinase		0.2909		0.0933882		0.116734		0.176605													-0.62	0.87	0.11	0.47	0.39	0.2	-0.35	0.75		0.100694		-0.30895		-0.0920291		0.317615
AT1G37130	Identified as a mutant resistant to chlorate. Encodes nitrate reductase structural gene. Involved in nitrate assimilation. Has nitrate reductase activity. Up-regulated by the fungus P. indica. Binds transcription factor At2g35940. The mRNA is cell-to-cell mobile.	protein_coding	NITRATE REDUCTASE 2 (NIA2)	NITRATE REDUCTASE 2 (NIA2); (B29); (NIA2-1);ARABIDOPSIS NITRATE REDUCTASE 2 (ATNR2);NITRATE REDUCTASE (NR);NITRATE REDUCTASE 2 (NR2);CHLORATE RESISTANT 3 (CHL3)	NIA2				1.70986	Nutrient uptake.nitrogen assimilation.nitrate assimilation.nitrate reductase		0.411682	-0.542164	0.0016412		0.114688		0.896894			-0.04	0.49	-0.22	0.0035	-0.19	0.0034	-0.01	0.77			-0.61	0.97	-0.91	0.49	0.28	0.82	0.58	0.51		-0.0422282		-0.490986		0.10334		0.552098
AT1G23190	Encodes a cytosolic phosphoglucomutase (PGM). Two Arabidopsis PGM proteins (AT1G70730/PGM2 and AT1G23190/PGM3) have high sequence similarities and redundant functions. Mature plants possessing a single cPGM allele had a major reduction in cPGM activity. Whereas pgm2 and pgm3 single mutants are undistinguishable from the wild type, loss of both PGM2 and PGM3 severely impairs male and female gameto…	protein_coding	PHOSPHOGLUCOMUTASE 3 (PGM3)	PHOSPHOGLUCOMUTASE 3 (PGM3)	PGM3				1.9342	Carbohydrate metabolism.sucrose metabolism.synthesis.cytosolic phosphoglucomutase	-0.662075	0.00152121	0.544725	0.00777245		0.267961	-0.910153	2.25881e-07			0	0.95	0.06	0.03	0.07	0.034	0.01	0.99			-0.59	0.75	-1.68	0.0067	0.01	0.12	1.1	0.085		0.201634		-0.333243		-0.338687		0.196191
AT3G51160	Catalyzes the first step in the de novo synthesis of GDP-L-fucose.	protein_coding	MURUS 1 (MUR1)	MURUS 1 (MUR1);MURUS 1 (MUR_1);GDP-D-MANNOSE-4,6-DEHYDRATASE 2 (GMD2)	MUR1				1.01735	Carbohydrate metabolism.nucleotide sugar biosynthesis.GDP-L-fucose synthesis.de novo biosynthesis.GDP-D-mannose 4,6-dehydratase	-0.59493	0.00288973		0.177019		0.972255	-0.896617	1.83182e-08	-1.24519		-0.05	0.92	0.27	0	0.28	0.00063	-0.03	0.81			-0.59	0.025	-0.37	0.1	0.09	0.47	-0.14	0.75		0.13505		-0.437686		-0.075617		0.497119
AT1G76510	ARID/BRIGHT DNA-binding domain-containing protein	protein_coding	AT RICH INTERACTION DOMAIN 4 (ARID4)	AT RICH INTERACTION DOMAIN 4 (ARID4)	ARID4					RNA biosynthesis.transcriptional activation.ARID transcription factor		0.291892		0.727954		0.979992		0.470813													-0.59	0.97	-0.89	0.83	0.38	0.77	0.69	0.27		0.561879		0.380272		-0.272372		-0.0907655
AT1G43690	ubiquitin interaction motif-containing protein	protein_coding								not assigned.not annotated		0.599403		0.367117		0.246493		0.735257			0.01	0.76	0.27	0.027	0.15	0.36	-0.11	0.57			-0.59	0.45	-1.01	0.015	-0.33	0.15	0.09	0.55		0.389042		-0.392317		-0.621488		0.159871
AT2G23140	PUB4 encodes a functional ubiquitin-protein ligase. The gene is expressed in most plant tissues and the protein localizes to the nucleus. PUB4 has been recovered as a second site suppressor from several different genetic screens and from these, it has been inferred to have roles in regulating root development, pollen tapetum development and ROS induced chloroplast degredation.	protein_coding	PLANT U-BOX 4 (PUB4)	(ATPUB4);PLANT U-BOX 4 (PUB4)	PUB4					not assigned.annotated		0.136505		0.993162		0.933596	0.439636	0.0395848													-0.59	0.74	-0.6	0.66	1.01	0.46	1.02	0.13		-0.229868		-0.923764		-0.26566		0.428237
AT3G11250	Ribosomal protein L10 family protein	protein_coding				uL10c				Protein biosynthesis.cytosolic ribosome.large subunit (LSU).LSU proteome component.RPP0 component	-0.779518	0.0210533	0.662842	0.0359995		0.148936	-0.892138	0.00111442	-1.31292	-1.08577											-0.58	0.69	-0.45	0.54	-0.19	0.28	-0.31	0.25		0.309047		-0.234465		-0.32112		0.222392
AT4G38550	phospholipase-like protein (PEARLI 4) family protein	protein_coding								not assigned.not annotated										1.42337											-0.58	0.18	-0.98	0.0079	-0.53	0.13	-0.12	0.77		0.271302		-0.130061		0.578076		0.979439
AT5G47210	Hyaluronan / mRNA binding family	protein_coding								not assigned.annotated	-0.847894	4.40417e-09		0.806685		0.531918	-1.05675	8.80549e-15	-1.10773		0.09	0.08	0.18	0.0001	0.13	0.0056	0.04	0.23			-0.56	0.27	0.34	0.63	0.53	0.44	-0.37	0.064		-0.0163018		-0.325986		0.133025		0.44271
AT5G40450	Encodes a member of a plant gene family, APK_ORTHOMCL5144,of unknown function. RBB1 is localized to the cytosol and involved in vacuolar biogenesis and organization. RBB1 mutants have increased number of vacuolar bulbs and fewer trans-vacuolar strands.	protein_coding	REGULATOR OF BULB BIOGENESIS1 (RBB1)	REGULATOR OF BULB BIOGENESIS1 (RBB1)	RBB1					not assigned.not annotated	0.521295	0.00832802		0.30975	-0.528574	0.0101071		0.297706		1.88448	-0.03	0.034	-0.09	0	-0.06	0.0046	0	0.78			-0.56	0.59	-1.21	0.08	-0.54	0.17	0.11	0.84		0.0588937		-0.812373		-0.358454		0.512813
AT2G27090	bZIP transcription factor (DUF630 and DUF632)	protein_coding								not assigned.annotated	0.560127	0.0405134		0.721064	-0.549598	0.0406445		0.651026		1.05299											-0.54	0.39	0.43	0.086	1.56	0.075	0.6	0.71		-0.333737		-0.201634		0.029344		-0.10276
AT1G15440	Encodes a nucleolar protein that is a ribosome biogenesis co-factor. Mutants display aberrant RNA processing and female gametophyte development.	protein_coding	PERIODIC TRYPTOPHAN PROTEIN 2 (PWP2)	PERIODIC TRYPTOPHAN PROTEIN 2 (ATPWP2);PERIODIC TRYPTOPHAN PROTEIN 2 (PWP2)	PWP2				1.53	Protein biosynthesis.cytosolic ribosome.small subunit (SSU).SSU processome.PWP2/UTP1 assembly factor	-1.05729	0.00374168	0.928726	0.00491516		0.225919	-1.44051	4.70761e-07	-1.72979												-0.54	0.54	0.48	0.2	0.89	0.065	-0.13	0.79	-1.11704	-1.11704	-1.07696	-1.07696		0.564498		0.524421
AT4G10840	Tetratricopeptide repeat (TPR)-like superfamily protein	protein_coding	KINESIN LIGHT CHAIN-RELATED 1 (KLCR1)	KINESIN LIGHT CHAIN-RELATED 1 (KLCR1)	KLCR1				4.18354	not assigned.annotated	0.473979	0.0150513		0.937715		0.854635	0.386039	0.0369398			0.1	0.088	0.33	0.00011	0.28	0.00073	0.05	0.36			-0.54	0.95	-0.78	0.91	0.09	0.63	0.33	0.45		0.0687128		-0.489656		-0.248347		0.310021
AT1G16860	Plasma membrane-localized proteins that negatively regulate cellulose synthesis by inhibiting the exocytosis of CESAs.	protein_coding	(SHOU4L)	(SHOU4L)	SHOU4L					not assigned.annotated		0.362504		0.357534		0.189997		0.545702													-0.54	0.28	0.16	0.056	0.7	0.046	0	0.14		0.13465		-0.333737		-0.327295		0.141092
AT1G35220	FAM91 carboxy-terminus protein	protein_coding								not assigned.not annotated		0.580285		0.215718		0.843461	-0.627477	0.00291491													-0.54	0.42	0.52	0.95	0.81	0.84	-0.24	0.94		-0.336049		-0.566347		0.21901		0.449307
AT5G16730	Encodes a microtubule-associated protein. The mRNA is cell-to-cell mobile.	protein_coding							2.30499	not assigned.annotated		0.105359		0.499203		0.953926		0.368638			0.31	0.044	0.12	0.29	-0.09	0.59	0.09	0.57			-0.53	0.77	-1.08	0.36	0.15	0.74	0.7	0.26		0		-0.945138		-0.345891		0.599247
AT4G32420	Cyclophilin-like peptidyl-prolyl cis-trans isomerase family protein	protein_coding							1.42473	Protein modification.protein folding and quality control.protein folding catalyst activities.Cyclophilin protein folding catalyst		0.360531		0.218711		0.208418		0.0741181													-0.53	0.29	0.04	0.87	0.64	0.26	0.07	0.88		-0.165586	-1.01749	-1.01749		-0.111421		0.74048
AT5G24890	stress response NST1-like protein	protein_coding							4.75223	not assigned.not annotated		0.131096		0.748431		0.923395	0.455199	0.0287117	1.37242												-0.52	0.28	-0.7	0.083	-0.06	0.83	0.11	1		0.154034		-0.316857		-0.133856		0.337035
AT1G16610	Encodes SR45, a member of the highly conserved family of serine/arginine-rich (SR) proteins, which play key roles in pre-mRNA splicing and other aspects of RNA metabolism. SR45 is a spliceosome protein, interacts with SR33 and the U1-70K protein of the U1 snRNP. Also involved in plant sugar response. sr45-1 mutation confers hypersensitivity to glucose during early seedling growth.	protein_coding	ARGININE/SERINE-RICH 45 (SR45)	(ATSR45);ARGININE/SERINE-RICH 45 (SR45)	SR45					RNA processing.RNA quality control Exon Junction complex (EJC).peripheral components.RNPS1 component		0.0836171		0.060718	-0.934984	0.00119208	-0.929876	0.00022823													-0.52	0.59	0.38	0.0038	1	0	0.1	0.26		0.32567		0.603578		0.852558		0.57465
AT3G44750	Encodes a histone deacetylase. Controls the development of adaxial/abaxial leaf polarity. Two lines with RNAi-directed against this gene show reduced Agrobacterium-mediated DNA transformation of the roots.	protein_coding	HISTONE DEACETYLASE 3 (HDA3)	HISTONE DEACETYLASE 2A (HD2A); (ATHD2A); (HD2A); (HDT1);HISTONE DEACETYLASE 3 (HDA3)	HDA3					Chromatin organisation.histone modifications.histone deacetylation.HD2 histone deacetylase	-1.82333	0.000654155	1.13504	0.0448819	1.2262	0.0466312	-1.73217	0.000443276	-2.68961	-1.85754											-0.51	0.29	-0.72	0.16	0.29	0.15	0.5	0.093		-0.183712		-0.923649		-0.60514		0.134797
AT3G10540	3-phosphoinositide-dependent protein kinase	protein_coding							2.82054	Protein modification.phosphorylation.AGC kinase superfamily.PDK kinase		0.981479		0.987906		0.613595		0.458305													-0.51	0.75	-5.31	0.27	1.5	0.58	6.31	0.076		-0.0489096		-0.0740006		0.0608822		0.0859732
AT4G27450	aluminum induced protein with YGL and LRDR motifs	protein_coding							1.80927	not assigned.annotated		0.754426		0.800716		0.249141		0.119689	4.16133	1.27316											-0.51	0.28	-1.22	0.048	0.18	0.15	0.89	0.013		0.403356		-0.199309		-0.366597		0.236067
AT4G01090	Hypothetical protein; participates in wound-induced lateral root development.	protein_coding							2.34623	not assigned.not annotated		0.298104		0.0674002	-0.516095	0.0211024		0.477126													-0.51	0.87	1.22	0.011	1.28	0.17	-0.45	0.35		0.0916305		-0.471306		-0.103505		0.459432
AT2G34640	Present in transcriptionally active plastid chromosomes. Involved in plastid gene expression.	protein_coding	PLASTID TRANSCRIPTIONALLY ACTIVE 12 (PTAC12)	PLASTID TRANSCRIPTIONALLY ACTIVE 12 (PTAC12); (TAC12);HEMERA (HMR)	PTAC12					RNA biosynthesis.organelle machineries.RNA polymerase activities.plastid-encoded RNA polymerase (PEP) complex.essentiell co-factors.PAP5/TAC12 component	-0.592728	0.00146739	0.552455	0.00067882		0.2465	-0.877471	1.69719e-10		-1.54123	0	0.79	0.01	0.98	-0.04	0.44	-0.05	0.57			-0.5	0.63	0.6	0.86	0.67	1	-0.42	0.3		-0.494765	-1	-1		-0.259759		0.245476
AT1G54270	member of eIF4A - eukaryotic initiation factor 4A	protein_coding	EIF4A-2 (EIF4A-2)	EIF4A-2 (EIF4A-2)	EIF4A-2				1.68238	Protein biosynthesis.translation initiation.mRNA loading.eIF4A mRNA unwinding factor	-0.773237	2.25396e-08		0.941772		0.352751	-0.944723	2.93518e-14			0.34	0.3	0.61	0.24	0.11	0.95	-0.16	0.29			-0.5	0.34	-0.34	0.47	-0.53	0.27	-0.69	0.25		0.182986		-0.314247		-0.243271		0.253963
AT5G04990	Encodes a member of the Sad1/UNC-84 (SUN)-domain proteins: AtSUN1(At5g04990), AtSUN2(AT3G10730). SUN domain proteins are part of the cytoskeletal-nucleoskeletal bridging complexes. AtSUN1 and AtSUN2 are localized to the nuclear envelope and are present as homomers and heteromers in vivo.Encodes an outer nuclear membrane protein that anchors RanGAP1 to the nuclear envelope. It interacts with WPP d…	protein_coding	SAD1/UNC-84 DOMAIN PROTEIN 1 (SUN1)	SAD1/UNC-84 DOMAIN PROTEIN 1 (SUN1);ARABIDOPSIS SAD1/UNC-84 DOMAIN PROTEIN 1 (ATSUN1)	SUN1					Cytoskeleton.cytoskeleton-nucleoskeleton linking.SUN-WIP cytoskeleton-nucleoskeleton-linker complex.Cter-SUN inner nuclear envelope component		0.605384		0.667605		0.608208		0.62312			-0.92	0.42	0.04	0.6	0.93	0.36	-0.04	0.76			-0.5	0.15	-0.6	0.56	0.52	0.63	0.62	0.82		-0.0104166		-0.504231		-0.333737		0.160077
AT1G80810	One of 5 PO76/PDS5 cohesion cofactor orthologs of Arabidopsis.	protein_coding	(PDS5D)	(PDS5D); (SL2); (ATPDS5D)	PDS5D				1.05263	Cell cycle.mitosis and meiosis.sister chromatid separation.cohesin establishment.PDS5 cohesin cofactor		0.165988		0.365008		0.941254		0.727605													-0.5	0.26	-0.3	0.47	0.39	0.47	0.19	0.25		0.134017		-0.690896		-0.579157		0.245756
AT5G05060	Cystatin/monellin superfamily protein	protein_coding							1.34742	not assigned.not annotated		0.0892416		0.151375		0.857146		0.561509													-0.49	0.31	-1.78	0.025	-0.13	0.8	1.16	0.026		-0.0690416		0.177396		0.0757675		-0.17067
AT3G48530	SNF1-related protein kinase regulatory subunit gamma 1	protein_coding	SNF1-RELATED PROTEIN KINASE REGULATORY SUBUNIT GAMMA 1 (KING1)	(KIN&#947;);SNF1-RELATED PROTEIN KINASE REGULATORY SUBUNIT GAMMA 1 (KING1)	KING1					Multi-process regulation.SnRK1 metabolic regulator system.SnRK1 kinase complex.gamma regulatory subunit		0.764377		0.104092		0.599784		0.142548	1.94939	0.525013	-0.03	0.72	-0.03	0.77	0.01	0.84	0.01	0.66			-0.49	0.53	-1.33	0.013	-0.32	0.79	0.51	0.12		0.417727		-0.123575		-0.370074		0.171228
AT1G56340	Encodes one of three Arabidopsis calreticulins. In CRT-deficient mouse fibroblasts, this protein restores ER Ca2+ levels. Post-transcriptionally regulates together with CRT2 VAMP721/722 levels under ER stress.	protein_coding	CALRETICULIN 1A (CRT1a)	CALRETICULIN 1 (CRT1); (AtCRT1a);CALRETICULIN 1A (CRT1a)	CRT1a				1.3386	Protein modification.protein folding and quality control.N-glycan-dependent machinery.CNX-CRT cycle.CRT lectin chaperone		0.161132	0.615595	0.000975568	0.621501	0.00138815		0.121661	-1.27043	-1.40348	-0.09	0.17	0.13	0.029	0.11	0.024	-0.1	0.2			-0.48	0.91	-0.17	0.51	0.24	0.43	-0.06	0.76		0.00877021		-0.550197		-0.389042		0.169925
AT5G55300	Encodes a type-I DNA topoisomerase I. Disruptions in this gene affect phyllotaxis and plant architecture suggesting that the gene plays a critical role in the maintenance of a regular pattern of organ initiation. Isolated as a protein oxidized during seed germination; proteomics approach revealed differences in de novo synthesis levels of this protein in condition with vs. without salicylic acid …	protein_coding	DNA TOPOISOMERASE I ALPHA (TOP1ALPHA)	FASCIATA5 (FAS5);DNA TOPOISOMERASE I ALPHA (TOP1ALPHA)	TOP1ALPHA					Cell cycle.interphase.DNA replication.preinitiation.TOP1 DNA topoisomerase		0.820863		0.246319		0.558318		0.944854													-0.48	0.67	0.44	0.42	2.45	0.038	1.53	0.38		-0.276518		-0.61891		-0.463247		-0.120854
AT1G20760	EH domain containing protein.	protein_coding	ARABIDOPSIS THALIANA EH DOMAIN CONTAINING PROTEIN 1 (ATEH1)	ARABIDOPSIS THALIANA EH DOMAIN CONTAINING PROTEIN 1 (ATEH1)	ATEH1					Vesicle trafficking.clathrin coated vesicle (CCV) machinery.TPLATE AP-2 co-adaptor complex.EH component		0.593245		0.657492		0.812266		0.852457			0.2	0.6	0.19	0.94	-0.25	0.7	-0.24	0.87			-0.47	0.41	0.19	0.048	0.56	0.32	-0.11	0.33		0.153623		-0.190331		-0.245652		0.0983021
AT5G14720	Protein kinase superfamily protein	protein_coding							0.617612	Protein modification.phosphorylation.STE kinase superfamily.MAP4K kinase		0.264735		0.550049		0.767063		0.0859694													-0.47	0.83	-0.72	0.92	-0.87	0.27	-0.63	0.73		-0.135883		-0.431339		-0.252387		0.0430687
AT5G56010	A member of heat shock protein 90 (HSP90) gene family. Expressed in all tissues and abundant in root apical meristem, pollen and tapetum. Expression is NOT heat-induced but induced by IAA and NaCl. Overexpression reduced tolerance to heat and conferred higher tolerance to calcium. The mRNA is cell-to-cell mobile.	protein_coding	HEAT SHOCK PROTEIN 81-3 (HSP81-3)	HEAT SHOCK PROTEIN 81.3 (Hsp81.3);HEAT SHOCK PROTEIN 81-3 (HSP81-3);HEAT SHOCK PROTEIN 90-3 (AtHsp90-3);HEAT SHOCK PROTEIN 90.3 (AtHsp90.3)	HSP81-3				1.78828	External stimuli response.temperature.Hsp (heat-shock-responsive protein) families.Hsp90 family.Hsp90 protein		0.522609		0.0551023		0.5995	-1.00806	0.0337256			-0.35	0.15	-0.32	0.26	0.04	0.29	0.01	0.69			-0.47	0.97	-0.43	0.76	0.29	0.053	0.25	0.01		-0.0310269	-1.16227	-1.16227		-0.707645		0.4236
AT2G29190	Encodes a member of the Arabidopsis Pumilio (APUM) proteins containing PUF domain (eight repeats of approximately 36 amino acids each). PUF proteins regulate both mRNA stability and translation through sequence-specific binding to the 3' UTR of target mRNA transcripts.	protein_coding	PUMILIO 2 (PUM2)	PUMILIO 2 (PUM2);PUMILIO 2 (APUM2)	PUM2					not assigned.annotated		0.358851	0.388601	0.0455105		0.186598		0.0863199													-0.47	0.63	-1.33	0.22	3.27	0.29	4.13	0.015		-0.0660892	-1.11189	-1.11189		-0.356144		0.68966
AT1G27540	F-box protein (DUF295)	protein_coding	F-BOX/DUF295 BRASSICEAE-SPECIFIC 2 (ATFDB2)	F-BOX/DUF295 BRASSICEAE-SPECIFIC 2 (ATFDB2)	ATFDB2				1.35632	not assigned.annotated		0.853353		0.797674		0.216799	0.634761	0.0118967			-0.36	0.05	-0.16	0.28	-0.02	1	-0.22	0.25			-0.44	0.36	-3.11	0.00029	-0.62	0.32	2.05	0.028
AT4G31080	Encodes one of two LUNAPARK proteins in Arabidopsis. Both LNPA and LNPB are predominantly distributed throughout the ER, but not preferentially localized at the three-way junctions. Mutation of both LNPA and LNPB together caused the cortical ER to develop poor ER cisternae and a less dense tubular network.	protein_coding	LUNAPARK2.2 (LNP2.2)	LUNAPARK2.2 (LNP2.2);LUNAPARK A (LNPA)	LNP2.2					not assigned.annotated		0.0568226		0.979712		0.491988	-0.711013	0.000192912													-0.43	0.26	0.03	0.58	1.15	0.018	0.7	0.076		-0.0259952		0.237039		0.0130562		-0.249978
AT3G48740	Encodes a member of the SWEET sucrose efflux transporter family proteins.	protein_coding	(SWEET11)	(AtSWEET11); (SWEET11)	SWEET11				1.52063	Solute transport.carrier-mediated transport.TOC superfamily.SWEET sugar efflux transporter		0.538747		0.274635		0.614213		0.187884													-0.43	0.69	0.19	0.81	0.77	0.19	0.15	0.56		0.261993		0.256775		-0.252655		-0.247438
AT3G62700	member of MRP subfamily	protein_coding	ATP-BINDING CASSETTE C14 (ABCC14)	MULTIDRUG RESISTANCE-ASSOCIATED PROTEIN 10 (ATMRP10);ATP-BINDING CASSETTE C14 (ABCC14);MULTIDRUG RESISTANCE-ASSOCIATED PROTEIN 10 (MRP10)	ABCC14				1.23068	Solute transport.primary active transport.ABC superfamily.ABC1 family.subfamily ABCC transporter		0.522059		0.30242		0.809761		0.527888													-0.43	0.42	-0.13	0.1	0.33	0.14	0.04	0.92		0.148644		-0.945138		-0.418404		0.675378
AT5G58160	actin binding protein	protein_coding								Cytoskeleton.microfilament network.actin polymerisation.formin actin filament elongation factor activities.group-II formin		0.751411		0.723557		0.976983		0.359894													-0.43	0.64	-1.68	0.018	-0.53	0.69	0.72	0.26
AT2G28290	Encodes a SWI2/SNF2-like protein in the SNF2 subclass. Homozygous plants with null mutations exhibit premature termination of the meristem and carpelloid structures from the inflorescence meristem. Co-activator of floral homeotic gene expression. Acts with LFY to regulate shoot apical meristem identity. Required for meristem maintenance. Regulates flowering under a non-inductive photoperiod. It p…	protein_coding	SPLAYED (SYD)	SPLAYED (SYD);CHROMATIN REMODELING COMPLEX SUBUNIT R 3 (CHR3)	SYD					Chromatin organisation.chromatin remodeling complexes.ATPase core components.Snf2-like group.Snf2 chromatin remodeling factor	0.395971	0.0167755		0.0932968		0.0781991		0.212984			0.3	0.11	0.44	0.13	0.19	0.62	0.05	0.4			-0.42	0.81	0.03	0.86	1.11	0.2	0.66	0.028		0.0274807	-1.05658	-1.05658		-0.252187		0.831877
AT1G51690	55 kDa B regulatory subunit of phosphatase 2A mRNA,	protein_coding	PROTEIN PHOSPHATASE 2A 55 KDA REGULATORY SUBUNIT B ALPHA ISOFORM (B ALPHA)	PROTEIN PHOSPHATASE 2A 55 KDA REGULATORY SUBUNIT B ALPHA ISOFORM (B ALPHA)	B ALPHA				4.76596	Protein modification.dephosphorylation.serine/threonine protein phosphatase superfamily.PPP Fe-Zn-dependent phosphatase families.PP2A phosphatase complexes.B-type regulatory component	0.377353	0.0228131		0.554321		0.315273		0.766896			-0.24	0.024	-0.06	0.14	0.12	0.59	-0.07	0.51			-0.42	0.3	-0.47	0.32	0.09	0.47	0.14	0.76		-0.209096		-0.748461		-0.198329		0.341037
AT5G13020	Emsy N Terminus (ENT)/ plant Tudor-like domains-containing protein	protein_coding	EMSY-LIKE 3 (EML3)	EMSY-LIKE 3 (EML3); (AtEML3)	EML3				1.18203	not assigned.annotated	0.399514	0.0359969		0.706887		0.407025		0.0732177													-0.41	0.76	-0.91	0.22	0.37	0.91	0.87	0.45		-0.121306		-0.0715533		0.155795		0.106042
AT4G38900	Basic-leucine zipper (bZIP) transcription factor family protein	protein_coding	BASIC LEUCINE-ZIPPER 29 (BZIP29)	DRINK ME-LIKE (DKML);BASIC LEUCINE-ZIPPER 29 (BZIP29)	BZIP29				1.07834	RNA biosynthesis.transcriptional activation.bZIP superfamily.bZIP transcription factor	0.544982	0.0397842		0.873751	-0.512668	0.049917		0.766896													-0.41	0.96	-0.15	0.63	-0.32	0.92	-0.58	0.35		-0.16711		-0.245112		-0.10497		-0.026967
AT1G80530	Major facilitator superfamily protein	protein_coding								not assigned.annotated		0.0545342		0.340141		0.92156	-1.0415	0.000335812	-1.17837												-0.41	0.6	-0.2	0.24	0.5	0.39	0.29	0.028		-0.580775	-1.05123	-1.05123		0.13179		0.60224
AT5G02770	Encodes a conserved eukaryotic protein with homology to the human RNA binding protein CIP29 that localizes to the nucleus. Mutants accumulate more poly(A) mRNAs in the nucleus, likely resulting from reduced mRNA export activity.	protein_coding	MODIFIER OF SNC1, 11 (MOS11)	MODIFIER OF SNC1, 11 (MOS11)	MOS11					RNA processing.messenger ribonucleoprotein particle (mRNP).mRNP export.TREX/THO mRNP trafficking complex.CIP29/Tho1 component		0.519758		0.972024		0.980229		0.434167			-0.17	0.57	0.2	0.56	0.2	0.43	-0.16	0.56			-0.4	0.23	-0.49	0.32	0.28	0.099	0.36	0.41		-0.234465		-0.352302		-0.0142139		0.103623
AT3G61860	encodes an arginine/serine-rich splicing factor. transcript is alternatively spliced and is differentially expressed in different tissues (flowers, roots, stems, and leaves) examined. Barta et al (2010) have proposed a nomenclature for Serine/Arginine-Rich Protein Splicing Factors (SR proteins): Plant Cell. 2010, 22:2926.	protein_coding	ARGININE/SERINE-RICH SPLICING FACTOR 31 (RS31)	ARGININE/SERINE-RICH SPLICING FACTOR 31 (ATRSP31);ARGININE/SERINE-RICH SPLICING FACTOR 31 (RSP31);ARGININE/SERINE-RICH SPLICING FACTOR 31 (RS31);ARGININE/SERINE-RICH SPLICING FACTOR 31 (At-RS31)	RS31					RNA processing.RNA splicing.spliceosome-associated non-snRNP factors.RS31/40/41 splicing factor	-0.653844	0.0333431		0.655876		0.145267		0.232739													-0.39	0.98	-0.25	0.53	1.05	0.049	0.91	0.61		0.321928		-0.17897		-0.549339		-0.0484404
AT4G29750	CRS1 / YhbY (CRM) domain-containing protein	protein_coding							1.02789	not assigned.annotated	0.55601	0.008397		0.721064		0.646733		0.121455													-0.39	0.83	-1.81	0.56	21.51	0.83	22.92	0.56		-0.197939		-0.963474		-0.254573		0.510962
AT3G05030	Encodes a vacuolar K+/H+ exchanger essential for active K+ uptake at the tonoplast and involved in regulating stomatal closure.	protein_coding	SODIUM HYDROGEN EXCHANGER 2 (NHX2)	(ATNHX2);SODIUM HYDROGEN EXCHANGER 2 (NHX2)	NHX2				1.58338	Solute transport.carrier-mediated transport.CPA superfamily.CPA-1 family.proton:sodium cation antiporter (NHX-type)		0.491621		0.808126		0.921801		0.745796													-0.39	0.4	0.15	0.94	0.87	0.097	0.32	0.48								0.33787
AT3G18240	Ribosomal protein S24/S35	protein_coding					mS35			not assigned.not annotated	-1.11838	0.00279118		0.205209	0.972489	0.0118238	-0.604802	0.0434994			-0.25	0.53	0.11	0.18	0.26	0.32	-0.11	0.52			-0.38	0.69	-0.21	0.76	0.9	0.016	0.73	0.037				-0.609048				-0.178146
AT1G48920	Encodes ATNUC-L1 (NUCLEOLIN LIKE 1), the predominant form of the two nucleolin proteins found in Arabidopsis. This protein is involved in rRNA processing, ribosome biosynthesis, and vascular pattern formation. PARL1 localizes to the nucleolus and parl1 mutants accumulate elevated levels of the unspliced 35S pre-rRNA. parl1 mutants also have defects in cotyledon, leaf, sepal, and petal vein patter…	protein_coding	NUCLEOLIN LIKE 1 (NUC-L1)	NUCLEOLIN LIKE 1 (ATNUC-L1);PARALLEL 1 (PARL1);NUCLEOLIN 1 (NUC1);NUCLEOLIN LIKE 1 (NUC-L1)	NUC-L1				1.35876	RNA biosynthesis.rRNA biogenesis.Nucleolin rDNA chromatin transcription factor	-1.52341	2.01017e-08	0.867886	0.00341135	0.885372	0.00473795	-1.50592	7.02744e-09	-1.67717		0.21	0.063	0.27	0.0063	0.2	0.013	0.14	0.091			-0.38	0.27	0.41	0.5	0.35	0.27	-0.44	0.3		-0.0630787		-0.992306		-0.535449		0.393778
AT3G12390	Nascent polypeptide-associated complex (NAC), alpha subunit family protein	protein_coding							2.19513	Protein modification.protein folding and quality control.NAC ribosome-associated chaperone complex.alpha subunit	-0.920518	3.57214e-08		0.845731		0.676247	-0.852644	9.56179e-09			0.02	0.43	0.13	0.023	-0.11	0.24	-0.22	0.0056			-0.38	0.82	-1.07	0.0084	-0.45	0.003	0.24	0.29		-0.205749		-0.292553		-0.115039		-0.0282337
AT2G47980	Essential to the monopolar orientation of the kinetochores during meiosis.	protein_coding	SISTER-CHROMATID COHESION PROTEIN 3 (SCC3)	SISTER-CHROMATID COHESION PROTEIN 3 (ATSCC3);SISTER-CHROMATID COHESION PROTEIN 3 (SCC3)	SCC3					Cell cycle.mitosis and meiosis.sister chromatid separation.cohesin regulator complex.SCC3 component		0.353649	0.388859	0.0294203		0.505202		0.945946													-0.38	0.64	-0.34	0.69	0.08	0.79	0.04	0.94		-0.0986843		-0.748938		-0.368968		0.281286
AT5G61210	membrane localized t-SNARE SNAP25 homologue, probably involved in cytokinesis and cell plate formation The mRNA is cell-to-cell mobile.	protein_coding	SOLUBLE N-ETHYLMALEIMIDE-SENSITIVE FACTOR ADAPTOR PROTEIN 33 (SNAP33)	SOLUBLE N-ETHYLMALEIMIDE-SENSITIVE FACTOR ADAPTOR PROTEIN 33 (SNAP33); (ATSNAP33B); (SNP33); (ATSNAP33)	SNAP33					Vesicle trafficking.SNARE target membrane recognition and fusion complexes.Qbc-type SNARE components.SNAP25 group protein		0.170972		0.319157		0.849828	0.493391	0.004968		1.27113											-0.37	0.72	-0.39	0.84	0.21	0.46	0.23	0.48		-0.0073048		0		-0.044623		-0.0519278
AT5G61780	Involved in the regulation of AtGA20ox3 expression, as well as seed germination. The mRNA is cell-to-cell mobile.	protein_coding	TUDOR-SN PROTEIN 2 (TUDOR2)	TUDOR-SN PROTEIN 2 (TSN2);ARABIDOPSIS THALIANA TUDOR-SN PROTEIN 2 (AtTUDOR2);TUDOR-SN PROTEIN 2 (TUDOR2)	TUDOR2					RNA processing.messenger ribonucleoprotein particle (mRNP).stress granule.TSN ribonuclease	-0.813817	1.91006e-07	0.712065	2.86658e-06	0.483632	0.00653283	-1.04225	5.07037e-14			-0.03	0.2	0.19	0.14	0.1	0.028	-0.12	0.62			-0.36	0.14	-1.21	0.00021	-0.06	0.91	0.79	0.014		-0.302847	-1.07895	-1.07895		-0.498119		0.277985
AT2G14835	RING/U-box superfamily protein	protein_coding								not assigned.not annotated		0.598345		0.190193		0.638695		0.114244													-0.36	0.83	-2.13	0.63	0.79	0.5	2.57	0.16		-0.407424		-0.673499		-0.321928		-0.0558532
AT1G80680	Mutant has early-flowering phenotype, encodes a putative nucleoporin. Required for the activation of downstream defense pathways by the snc1 mutation. Involved in basal resistance against bacterial pathogens.	protein_coding	SUPPRESSOR OF AUXIN RESISTANCE 3 (SAR3)	SUPPRESSOR OF AUXIN RESISTANCE 3 (SAR3); (NUP96);PRECOCIOUS (PRE);MODIFIER OF SNC1,3 (MOS3)	SAR3					Protein translocation.nucleus.nucleocytoplasmic transport.nuclear pore complex (NPC).outer ring.NUP96 scaffold nucleoporin		0.557677		0.313079		0.54228		0.283002													-0.36	0.52	-0.93	0.36	-0.01	0.2	0.56	0.75		-0.0344884		-0.465123		-0.246837		0.183797
AT4G03260	MASP1 overexpression promotes growth during drought and promotes microtubule stability and recovery after stress as well as microtubule bundling.MASP1 growth promotion and microtubule stabilization activities are dependent upon serine 670 phosphorylation. MASP1 binds microtubules;this activity is not affected by MASP1 phosphorylation status.MASP1 protein levels are induced by drought post-transcr…	protein_coding	MICROTUBULE ASSOCIATED STRESS PROTEIN 1 (MASP1)	MICROTUBULE ASSOCIATED STRESS PROTEIN 1 (MASP1)	MASP1					not assigned.not annotated		0.60715	-0.418982	0.0206232	-0.418177	0.0295722		0.548367													-0.35	0.83	0.04	0.92	-0.72	0.12	-1.11	0.11		-0.0641303		0.231326		0.155278		-0.140178
AT2G21150	Encodes a nuclear localized XAP5 family protein involved in light regulation of the circadian clock and photomorphogenesis. XCT loss of function mutations also show decreased levels of DCL1, 3 and 4 and correspondingly lower levels of certain small RNAs suggesting a role in sRNA biogenesis.	protein_coding	XAP5 CIRCADIAN TIMEKEEPER (XCT)	XAP5 CIRCADIAN TIMEKEEPER (XCT)	XCT					Multi-process regulation.circadian clock.XCT light-dependent circadian clock regulator		0.998483		0.601202		0.95798		0.472784													-0.35	0.83	0.18	0.27	0.82	0.25	0.28	0.77		-0.342888	-1.30812	-1.30812		-0.214594		0.750641
AT4G27860	vacuolar iron transporter (VIT) family protein	protein_coding	MEMBRANE OF ER BODY 1 (MEB1)	MEMBRANE OF ER BODY 1 (MEB1)	MEB1					Solute transport.carrier-mediated transport.VIT family.metal cation transporter (MEB-type)	-0.87152	2.21369e-06		0.0793069	0.521062	0.0117537	-0.684666	4.87968e-06			0.78	0.01	0.78	0.0062	0.38	0.14	0.38	0.12			-0.34	0.34	-0.11	0.36	0.54	0.1	0.3	0.076		0.326501		-0.304855		-0.496426		0.13493
AT4G26130	cotton fiber protein	protein_coding							0.353121	RNA processing.RNA modification.tRNA N6-threonylcarbamoylation.KEOPS/EKC complex.BUD32 component		0.510856	-0.598274	0.0231727		0.119594		0.768864			-0.1	0.4	-0.13	0.19	0.11	0.63	0.14	0.16			-0.34	0.45	-0.81	0.21	-1.02	0.49	-0.55	0.73		0.0752881		-0.358894		-0.159267		0.274916
AT3G01780	Encodes TPLATE, a cytokinesis protein targeted to the cell plate. Functions in vesicle-trafficking events required for site-specific cell wall modifications during pollen germination and for anchoring of the cell plate to the mother wall at the correct cortical position.	protein_coding	(TPLATE)	(TPLATE)	TPLATE				3.36429	Vesicle trafficking.clathrin coated vesicle (CCV) machinery.TPLATE AP-2 co-adaptor complex.TPLATE component		0.180438		0.108429		0.916333	-0.658129	2.74792e-05			0.18	0.24	0.29	0.61	-0.05	0.29	-0.16	0.69			-0.34	0.63	-1.02	0.47	-0.08	0.86	0.6	0.028		-0.313815		-0.885357		-0.0904153		0.481127
AT5G56360	Encodes PSL4, beta-subunit of endoplasmic reticulum-resident glucosidase II, which is essential for stable accumulation and quality control of the elf18 receptor EFR but not the flg22 receptor FLS2. The mRNA is cell-to-cell mobile.	protein_coding	PRIORITY IN SWEET LIFE 4 (PSL4)	PRIORITY IN SWEET LIFE 4 (PSL4)	PSL4				2.03955	Protein modification.N-linked glycosylation.complex N-glycan maturation.class-II glucosidase II complex.subunit beta	-1.05014	1.18223e-08	0.536986	0.00212691	0.581853	0.00523938	-1.00528	8.08787e-12			-0.05	0.22	0.24	0.25	0.32	0.037	0.03	0.87			-0.33	0.92	-0.22	0.7	0.47	0.37	0.36	0.62		-0.235103		-0.788496		-0.516398		0.0369942
AT1G69030	BSD domain-containing protein	protein_coding							0.338583	RNA biosynthesis.transcriptional activation.BSD transcription factor		0.73307		0.27793		0.214361		0.831508	-1.19481												-0.33	0.82	-0.66	0.6	0.43	0.17	0.77	0.082		0.308122		-0.551015		-0.817797		0.0413408
AT1G17980	Encodes a poly(A) polymerase. Located in the nucleus. It limits founder-cell recruitment to organ primordia and suppresses the salicylic acid-independent immune response downstream of EDS1/PAD4.	protein_coding	POLY(A) POLYMERASE 1 (PAPS1)	POLY(A) POLYMERASE 1 (PAPS1)	A				0.665806	RNA processing.RNA 3'-end polyadenylation.poly(A) RNA polymerase		0.0911343		0.754546		0.754157		0.39247													-0.33	0.27	-0.55	0.1	-0.54	0.63	-0.32	0.35		0.147754		-0.229482		-0.257937		0.119299
AT2G38040	encodes the carboxyltransferase alpha subunit of acetyl-CoA carboxylase, involved in de novo fatty acid biosynthesis	protein_coding	ACETYL CO-ENZYME A CARBOXYLASE CARBOXYLTRANSFERASE ALPHA SUBUNIT (CAC3)	ACETYL CO-ENZYME A CARBOXYLASE CARBOXYLTRANSFERASE ALPHA SUBUNIT (CAC3)	CAC3					Lipid metabolism.fatty acid synthesis.acetyl-CoA carboxylation.polymeric acetyl-CoA carboxylase complex.carboxyltransferase alpha subunit		0.660185		0.599392		0.0697824	-0.291942	0.0493323			-0.04	0.37	-0.11	0.024	-0.03	0.88	0.04	0.22			-0.31	0.72	-0.73	0.054	0.04	1	0.46	0.017		-0.101538		-0.709221		-0.308838		0.298844
ATCG00490	large subunit of RUBISCO. Protein is tyrosine-phosphorylated and its phosphorylation state is modulated in response to ABA in Arabidopsis thaliana seeds.	protein_coding	(RBCL)	(RBCL)	RBCL					Photosynthesis.calvin cycle.ribulose-1,5-bisphosphat carboxylase/oxygenase (RuBisCo) activity.RuBisCo dimer.large subunit		0.696374		0.0573321		0.777182	0.446907	0.0341435		-1.27238	-0.05	0.021	-0.47	0	-0.3	0	0.12	0.018			-0.31	0.63	-1.01	0.86	-0.62	0.32	0.08	0.92	-1.08246	-1.08246		-0.526069		0.956931		0.400538
AT5G20280	Encodes a protein with putative sucrose-phosphate synthase activity. When the gene was expressed in transgenic tobacco plants, a clear trend for increased SPS activity was noted.	protein_coding	SUCROSE PHOSPHATE SYNTHASE 1F (SPS1F)	SUCROSE PHOSPHATE SYNTHASE 1F (ATSPS1F);SUCROSE-PHOSPHATE SYNTHASE A1 (SPSA1);SUCROSE PHOSPHATE SYNTHASE 1F (SPS1F)	SPS1F					Carbohydrate metabolism.sucrose metabolism.synthesis.sucrose-phosphate synthase	0.49942	0.0202179		0.0704224		0.872408		0.539171		0.460548	0.03	0.5	0.02	0.85	0.02	0.74	0.02	0.73			-0.3	0.39	0	0.67	0.25	0.92	-0.05	0.64		-0.117836	-1.05772	-1.05772		-0.278464		0.661415
AT1G74690	Encodes a microtubule-associated protein.	protein_coding	IQ-DOMAIN 31 (IQD31)	IQ-DOMAIN 31 (IQD31)	IQD31					not assigned.annotated		0.0989547		0.31392		0.265262		0.0818265													-0.3	0.89	-0.14	0.63	0.09	0.85	-0.07	1		-0.219781		-0.592825		-0.104108		0.268935
AT5G26860	Encodes a member of the Lon protease-like proteins (Lon1/At5g26860, Lon2/At5g47040, Lon3/At3g05780, Lon4/At3g05790). Lon is a multifunctional ATP-dependent protease which exists in bacteria, archaea and within organelles in eukaryotic cells. Lon proteases are responsible for the degradation of abnormal, damaged and unstable proteins. The mRNA is cell-to-cell mobile.	protein_coding	LON PROTEASE 1 (LON1)	LON PROTEASE 1 (LON1); (LON_ARA_ARA)	LON1					Protein degradation.peptidase families.serine-type peptidase activities.LON protease		0.962858	0.618607	0.0413649		0.678761		0.18526	-1.81167		0.26	0.17	0.63	0	0.42	0.021	0.05	0.97			-0.29	1	0.29	0.035	0.43	0.099	-0.15	0.36		-0.147342		-0.732304		-0.226276		0.358687
AT4G22670	Encodes one of the 36 carboxylate clamp (CC)-tetratricopeptide repeat (TPR) proteins (Prasad 2010, Pubmed ID: 20856808) with potential to interact with Hsp90/Hsp70 as co-chaperones. The mRNA is cell-to-cell mobile.	protein_coding	HSP70-INTERACTING PROTEIN 1 (HIP1)	HSP70-INTERACTING PROTEIN 1 (AtHip1);TETRATRICOPEPTIDE REPEAT 11 (TPR11);HSP70-INTERACTING PROTEIN 1 (HIP1)	HIP1				3.26985	not assigned.annotated		0.612772		0.313674		0.496885	-0.69116	0.00161717			-0.31	0.044	-0.17	0.27	-0.11	0.21	-0.25	0.0019			-0.29	0.66	-0.48	0.34	0.19	0.88	0.38	0.44		-0.232173		-0.851901		-0.0885367		0.531191
AT1G20920	P-loop containing nucleoside triphosphate hydrolases superfamily protein	protein_coding	REGULATOR OF CBF GENE EXPRESSION 1 (RCF1)	REGULATOR OF CBF GENE EXPRESSION 1 (RCF1)	RCF1					RNA processing.RNA splicing.spliceosome assembly/disassembly.RNA helicase activities.Prp5 RNA helicase		0.991104		0.666099		0.347101		0.0579138			-0.12	0.51	0.29	0.083	0.35	0.05	-0.07	0.56			-0.29	0.49	-0.46	0.4	0.59	0.66	0.75	0.073		0.321928		-0.862496		-0.217591		0.966833
AT4G23040	Ubiquitin-like superfamily protein	protein_coding							2.03617	not assigned.annotated		0.496323		0.0620138		0.673746		0.786022			-0.02	0.63	0.12	0.075	0.1	0.37	-0.04	0.39			-0.29	0.73	-0.87	0.69	0.31	0.36	0.88	0.13						-0.127304		0.815363
AT4G39860	hematological/neurological-like protein	protein_coding								not assigned.not annotated		0.755764		0.579789		0.0763088		0.49449	-1.0705		-0.26	0.025	0.24	0.053	0.47	0.00044	-0.04	0.52			-0.28	0.52	0.68	0.1	1.14	0.011	0.19	0.46		0.517399		0.250407		-0.62504		-0.358048
AT2G24050	Encodes a putative eukaryotic translation initiation factor.	protein_coding	EUKARYOTIC TRANSLATION INITIATION FACTOR ISOFORM 4G2 (eIFiso4G2)	EUKARYOTIC TRANSLATION INITIATION FACTOR ISOFORM 4G2 (eIFiso4G2)	eIFiso4G2					Protein biosynthesis.translation initiation.mRNA loading.eIF-iso4F unwinding complex.eIF-iso4G component	-1.25865	1.76822e-10		0.142928		0.934877	-1.55045	2.84752e-20	-1.5539	-1.3128	-0.04	0.96	0.07	0.15	0.26	0.083	0.15	0.049			-0.27	0.83	2.31	0.51	2	1	-0.58	0.083		0.0874628		-0.442005		-0.368645		0.160823
AT3G13300	Encodes VCS (VARICOSE). Involved in mRNA decapping. VCS forms a mRNA decapping complex with DCP1 (At1g08370) and DCP2 (At5g13570). Unlike DCP2, VCS itself does not have mRNA decapping activity in vitro. DCP1, DCP2 and VCS colocalize in cytoplasmic loci, which are putative Arabidopsis mRNA processing bodies. Null mutants of DCP1, DCP2, and VCS accumulate capped mRNAs with a reduced degradation rat…	protein_coding	VARICOSE (VCS)	VARICOSE (VCS)	VCS				2.74113	RNA processing.RNA decay.deadenylation-dependent mechanism.mRNA decapping complex.VCS scaffold component	-0.332953	0.0247014		0.0772506		0.678761	-0.680146	1.64552e-09			-0.07	0.47	0.13	0.27	0.17	0.24	-0.04	0.5			-0.26	0.83	21.81	0.05	21.55	0.56	-0.52	0.25		-0.104023		-0.560088		0		0.456065
AT1G65660	Encodes a CCHC zinc finger protein that may function as a step II splicing factor. In an epigenetic allele of SMP1 (in which SMP1 and SMP2 mRNA is reduced) organs are smaller and contain fewer cells.	protein_coding	SWELLMAP 1 (SMP1)	SWELLMAP 1 (SMP1)	SMP1				1.89934	not assigned.annotated		0.953671		0.890373		0.850816		0.571179													-0.26	0.69	0.23	0.39	-0.86	0.11	-1.35	0.019		-0.172837		-0.369234		-0.123148		0.073249
AT3G19420	Encodes a phosphatase with low in vitro tyrosine phosphatase activity that is capable of dephosphorylating in vitro the 3'phosphate group of PI3P, PI(3,4)P2, and PI(3,5)P2 and may be an effector of lipid signaling. The mRNA is cell-to-cell mobile.	protein_coding	PTEN 2 (PEN2)	PHOSPHATASE AND TENSIN HOMOLOG DELETED ON CHROMOSOME TEN 2A (PTEN2A);PTEN 2 (ATPEN2);PTEN 2 (PEN2)	PEN2					Protein modification.dephosphorylation.tyrosine protein phosphatase (PTP) superfamily.dual-specificity phosphatase families.PTEN lipid phosphatase	0.481516	0.00740388		0.866765		0.904954	0.490077	0.00184371			-0.19	0.97	0.28	0.034	0.37	0.41	-0.09	0.55			-0.25	0.21	-0.28	0.19	0.13	0.14	0.16	0.27		-0.283172		-0.508464		-0.136635		0.0886576
AT2G47400	CP12-1 encodes a small peptide found in the chloroplast stroma. It belongs to the CP12 gene family thought to be involved in the formation of a supramolecular complex with glyceraldehyde-3-phosphate dehydrogenase (GAPDH) and phosphoribulokinase (PRK) embedded in the Calvin cycle. The mRNA is cell-to-cell mobile.	protein_coding	CP12 DOMAIN-CONTAINING PROTEIN 1 (CP12-1)	CP12 DOMAIN-CONTAINING PROTEIN 1 (CP12);CP12 DOMAIN-CONTAINING PROTEIN 1 (CP12-1)	CP12-1					not assigned.annotated		0.394435	-0.91999	7.11596e-05	-0.826178	0.000621062		0.58863			-0.07	0.15	-0.25	0.00022	-0.28	0.007	-0.09	0.39			-0.24	0.42	-1.75	0.011	-0.98	0.028	0.53	0.25		0.204175		0.290393		0.290276		0.204058
AT2G38310	Encodes a member of the PYR (pyrabactin resistance )/PYL(PYR1-like)/RCAR (regulatory components of ABA receptor) family proteins with 14 members. PYR/PYL/RCAR family proteins function as abscisic acid sensors. Mediate ABA-dependent regulation of protein phosphatase 2Cs ABI1 and ABI2. The mRNA is cell-to-cell mobile.	protein_coding	PYR1-LIKE 4 (PYL4)	PYR1-LIKE 4 (PYL4); (ATPYL4);REGULATORY COMPONENTS OF ABA RECEPTOR 10 (RCAR10)	PYL4					Phytohormones.abscisic acid.perception and signalling.PYR/PYL-receptor.cytoplasm-localized receptor complex.PYL/RCAR-type receptor component		0.949747	-1.27472	1.26023e-08	-1.4968	1.23379e-11		0.543147													-0.24	0.87	-1.09	0.36	0.47	1	1.32	0.35		0.352551		0.740954	1.13786	1.13786		0.749457
AT4G20300	Serine/Threonine-kinase, putative (DUF1639)	protein_coding							6.63308	not assigned.not annotated		0.96225	-0.691371	0.00263158		0.394277	0.451081	0.0434077													-0.23	0.51	0.22	0.56	2.18	0.13	1.73	0.083		0.13179		0.209792		0.0170735		-0.060929
AT4G11790	Pleckstrin homology (PH) domain superfamily protein	protein_coding							2.48554	not assigned.not annotated		0.475194		0.874227		0.853447		0.402876													-0.23	0.95	-1.95	0.15	-0.14	0.19	1.59	0.016		0.376148		-0.0310269		-0.345775		0.0614005
AT5G16260	Encodes a RNA binding protein ELF9 (EARLY FLOWERING9). Loss of ELF9 function in the Wassilewskija ecotype causes early flowering in short days. ELF9 reduces SOC1 (SUPPRESSOR OF OVEREXPRESSION OF CO1) transcript levels, possibly via nonsense-mediated mRNA decay. The mRNA is cell-to-cell mobile.	protein_coding	EARLY FLOWERING 9 (ELF9)	EARLY FLOWERING 9 (ELF9)	ELF9					not assigned.not annotated		0.925996		0.211665		0.799697		0.483455			0.41	0.4	0.3	0.87	0.21	0.85	0.32	0.35			-0.23	0.15	-0.58	0.028	0.08	0.58	0.43	0.12		0.056034		-0.957772		-0.680823		0.332983
AT3G11330	Encodes PIRL9, a member of the Plant Intracellular Ras-group-related LRRs (Leucine rich repeat proteins). PIRLs are a distinct, plant-specific class of intracellular LRRs that likely mediate protein interactions, possibly in the context of signal transduction. PIRL1 (AT5G05850) and PIRL9 (AT3G11330) are genetically redundant and are required for differentiation of microspores into pollen.	protein_coding	PLANT INTRACELLULAR RAS GROUP-RELATED LRR 9 (PIRL9)	PLANT INTRACELLULAR RAS GROUP-RELATED LRR 9 (PIRL9)	PIRL9				1.10071	not assigned.annotated		0.672713		0.155765		0.853134		0.630831			-0.28	0.36	-0.02	0.76	0.31	0.32	0.05	0.62			-0.23	0.58	0.17	0.74	-0.18	0.84	-0.58	0.82		0.135655		-0.626185		-0.331206		0.430634
AT4G08920	Encodes CRY1, a flavin-type blue-light photoreceptor with ATP binding and autophosphorylation activity. Functions in perception of blue / green ratio of light. The photoreceptor may be involved in electron transport. Mutant phenotype displays a blue light-dependent inhibition of hypocotyl elongation. Photoreceptor activity requires light-induced homodimerisation of the N-terminal CNT1 domains of …	protein_coding	CRYPTOCHROME 1 (CRY1)	CRYPTOCHROME 1 (CRY1);BLUE LIGHT UNINHIBITED 1 (BLU1); (ATCRY1);OUT OF PHASE 2 (OOP2);ELONGATED HYPOCOTYL 4 (HY4)	CRY1					External stimuli response.light.UV-A/blue light.cryptochrome-mediated photoperception.CRY cryptochrome photoreceptor	0.548497	1.10264e-06	-0.258741	0.0482446	-0.444597	0.00012631	0.362641	0.00101708	1.27204		0.12	0.21	0.13	0.73	-0.02	0.15	-0.03	0.63			-0.22	0.52	-2.03	0.86	-0.81	0.27	0.99	0.75		0.0164881		-0.715023		-0.221027		0.510484
AT1G80270	PENTATRICOPEPTIDE REPEAT 596	protein_coding	PENTATRICOPEPTIDE REPEAT 596 (PPR596)	PENTATRICOPEPTIDE REPEAT 596 (PPR596)	PPR596				1.86343	not assigned.annotated		0.346083	0.83573	0.0138205		0.118347		0.0538475	-2.45882												-0.22	0.52	1.61	0.11	1.44	0.52	-0.39	0.83		-0.150492	-1.02748	-1.02748		-0.707064		0.169925
AT2G43680	IQ-domain 14	protein_coding	IQ-DOMAIN 14 (IQD14)	IQ-DOMAIN 14 (IQD14)	IQD14					Cytoskeleton.cytoskeleton-plasma membrane-cell wall interface.IQD13 microtubule - plasma membrane linkage regulator		0.981586	-0.736832	1.04486e-05	-0.752752	9.18302e-06		0.97667													-0.22	0.57	0.09	0.68	0.85	0.0089	0.54	0.041		0.115477		0.473931		0.495957		0.137504
AT1G68070	Zinc finger, C3HC4 type (RING finger) family protein	protein_coding								Protein degradation.peptide tagging.Ubiquitin (UBQ)-anchor addition (ubiquitylation).UBQ-ligase E3 activities.RING-domain E3 ligase activities.RING-H2-type E3 ligase		0.15229		0.923946		0.95465		0.0908198													-0.22	0.52	0	0.36	-0.22	0.58	-0.44	0.92		-0.292782		-0.849175		-0.340075		0.216318
AT2G38770	P-loop containing nucleoside triphosphate hydrolases superfamily protein	protein_coding	EMBRYO DEFECTIVE 2765 (EMB2765)	MOS4-ASSOCIATED COMPLEX 7 (MAC7);EMBRYO DEFECTIVE 2765 (EMB2765)	EMB2765					RNA processing.RNA splicing.spliceosome-associated non-snRNP MOS4-associated complex (MAC).associated components.MAC7 component		0.0971194	0.814787	6.88074e-05		0.0727803	-0.781145	3.79272e-05			0.22	0.14	0.21	0.19	0.04	0.79	0.05	0.59			-0.21	0.83	0.02	0.77	-0.31	0.56	-0.54	1		-0.263034	-1.02106	-1.02106		-0.675565		0.0824622
AT3G19770	Guanine nucleotide exchange factor VPS9a. Can activate all Rab5 members to GTP-bound forms in vitro. Required for embryogenesis. Regulates the localization of ARA7 and ARA6. Involved in postembryonic root development.	protein_coding	(VPS9A)	ARABIDOPSIS THALIANA VACUOLAR PROTEIN SORTING 9A (AtVPS9A); (VPS9); (VPS9A)	VPS9A				1.08835	Vesicle trafficking.regulation of membrane tethering and fusion.RAB-GTPase guanine nucleotide exchange factor (RAB-GEF) activities.VPS9 RAB5 guanine nucleotide exchange factor		0.982729		0.97404		0.669753		0.496799													-0.2	0.46	-0.11	0.15	-0.1	0.052	-0.19	0.97		0.645083		0.045324		-0.691878		-0.0921182
AT3G07810	RNA-binding (RRM/RBD/RNP motifs) family protein	protein_coding								not assigned.annotated	-0.855304	7.02196e-07	0.428758	0.0110339		0.58044	-1.13004	1.34204e-16			-0.75	0.28	0.07	0.83	0.34	1	-0.48	0.25			-0.19	0.91	-1.29	0.36	-0.91	0.84	0.18	0.26		-0.59368		-0.731183		0.089005		0.226509
AT1G12270	Encodes one of the 36 carboxylate clamp (CC)-tetratricopeptide repeat (TPR) proteins (Prasad 2010, Pubmed ID: 20856808) with potential to interact with Hsp90/Hsp70 as co-chaperones.	protein_coding	HOP1 (Hop1)	HOP1 (Hop1)	Hop1					not assigned.annotated	-0.441322	0.0253515	0.377351	0.0379113		0.833141	-0.748374	3.19047e-07			-0.16	0.19	0.24	0.00013	0.33	0.00082	-0.07	0.2			-0.19	0.42	-0.44	0.27	1.08	0.028	1.33	0.009		-0.194912		-0.766328		-0.0840643		0.487352
AT3G13235	ubiquitin family protein	protein_coding	DNA-DAMAGE INDUCIBLE 1 (DDI1)	DNA-DAMAGE INDUCIBLE 1 (DDI1)	DDI1				0.76579	not assigned.not annotated		0.808555	0.680126	0.00179933	0.603612	0.0121139		0.501096			0.14	0.42	0.41	0.041	0.31	0.51	0.03	0.94			-0.19	0.42	-0.35	0.27	-0.08	0.86	0.08	0.46		0.228129		-0.801619		-0.711832		0.317915
AT3G23900	RNA recognition motif (RRM)-containing protein	protein_coding							17.1029	not assigned.not annotated		0.275421		0.208391		0.678491	-0.427887	0.0181491													-0.19	0.49	-0.02	0.91	0.53	0.06	0.36	0.29		-0.222392		-0.909235		-0.263034		0.423808
ATCG00710	Encodes a 8 kD phosphoprotein that is a component of the photosystem II oxygen evolving core. Its exact molecular function has not been determined but it may play a role in mediating electron transfer between the secondary quinone acceptors, QA and QB, associated with the acceptor side of PSII.	protein_coding	PHOTOSYSTEM II REACTION CENTER PROTEIN H (PSBH)	PHOTOSYSTEM II REACTION CENTER PROTEIN H (PSBH)	PSBH					Photosynthesis.photophosphorylation.photosystem II.PS-II complex.component PsbH		0.715944	-0.43108	0.0192711		0.193823		0.211802			-0.05	1	0.14	0.36	-0.01	1	-0.2	0.6			-0.19	0.64	-1.23	0.003	-0.65	0.035	0.39	0.13	-1.12029	-1.12029		-0.736966	1.37126	1.37126		0.987927
AT2G17840	Identified as drought-inducible gene by differential hybridization. Upregulated by high light, drought, cold and salt stress determined by microarray analysis.	protein_coding	EARLY-RESPONSIVE TO DEHYDRATION 7 (ERD7)	EARLY-RESPONSIVE TO DEHYDRATION 7 (ERD7)	ERD7					not assigned.annotated	0.598647	0.011142	0.613693	0.0052764		0.100421		0.0527902		0.806717											-0.18	0.63	-0.18	0.72	0.83	0.0062	0.83	0.009		0.066671		-0.29059		-0.146841		0.21042
AT5G22840	Protein kinase superfamily protein	protein_coding							3.41552	Protein modification.phosphorylation.CMGC kinase superfamily.SRPK kinase		0.0906334		0.289551		0.292315	-0.763477	0.0401488													-0.18	0.75	-0.08	0.47	-0.18	0.47	-0.28	0.35				-0.448985			-1.09464	-1.09464
AT4G08180	OSBP(oxysterol binding protein)-related protein 1C	protein_coding	OSBP(OXYSTEROL BINDING PROTEIN)-RELATED PROTEIN 1C (ORP1C)	OSBP(OXYSTEROL BINDING PROTEIN)-RELATED PROTEIN 1C (ORP1C)	OXYSTEROL BINDING PROTEIN					not assigned.annotated		0.879824		0.49405		0.43666		0.738743													-0.18	0.42	0.07	0.24	0.23	0.36	-0.02	0.46		0.249978		-0.454566		-0.426009		0.278535
AT3G24300	Encodes a plasma membrane localized ammonium transporter.	protein_coding	AMMONIUM TRANSPORTER 1;3 (AMT1;3)	AMMONIUM TRANSPORTER 1;3 (ATAMT1;3);AMMONIUM TRANSPORTER 1;3 (AMT1;3)	AMT1;3				8.31669	Solute transport.channels.AMT family.ammonium transporter (AMT1-type)	-0.768385	0.0395096		0.777883		0.674899	-1.139	8.67437e-05													-0.17	0.42	0.41	0.2	0.78	0.011	0.2	0.46		0.402759		0.161751		0.200427		0.441435
AT4G02510	An integral membrane GTPase that functions as a transit-sequence receptor required for the import of proteins necessary for chloroplast biogenesis. Located in the outer chloroplast membrane. Phosphorylation of the G-domains regulate translocon assembly. The mRNA is cell-to-cell mobile.	protein_coding	TRANSLOCON AT THE OUTER ENVELOPE MEMBRANE OF CHLOROPLASTS 159 (TOC159)	TRANSLOCON AT THE OUTER ENVELOPE MEMBRANE OF CHLOROPLASTS 159 (TOC159);TRANSLOCON AT THE OUTER ENVELOPE MEMBRANE OF CHLOROPLASTS 86 (TOC86); (ATTOC159);TRANSLOCON AT THE OUTER ENVELOPE MEMBRANE OF CHLOROPLASTS 160 (TOC160);PLASTID PROTEIN IMPORT 2 (PPI2)	TOC159				2.09791	Protein translocation.chloroplast.outer envelope TOC translocation system.Toc90/Toc120/Toc132/Toc159 component	-0.63492	1.82625e-07		0.187592		0.652393	-0.930265	1.34235e-16			-0.01	0.99	0.21	0	0.17	0	-0.05	0.13			-0.17	0.56	-0.18	0.024	0.25	0.7	0.26	0.12		-0.23644		-0.753839		-0.408465		0.108934
AT3G04610	RNA-binding KH domain-containing protein	protein_coding	FLOWERING LOCUS KH DOMAIN (FLK)	FLOWERING LOCUS KH DOMAIN (FLK)	FLK				2.48194	not assigned.annotated		0.786576		0.081574		0.696299		0.0821035			0.17	0.16	0.1	0.29	0.07	0.07	0.14	0.037			-0.16	0.63	-0.07	0.47	0.68	0.1	0.58	0.047		0.116409		-0.451874		-0.276518		0.291766
AT5G47690	One of 5 PO76/PDS5 cohesion cofactor orthologs of Arabidopsis.	protein_coding	(PDS5A)	(PDS5); (ATPDS5A); (PDS5A)	PDS5A				1.14834	Cell cycle.mitosis and meiosis.sister chromatid separation.cohesin establishment.PDS5 cohesin cofactor		0.433787	0.370235	0.0241092		0.475603		0.835823			-0.08	0.83	0.02	0.75	0.04	0.71	-0.05	0.85			-0.15	0.77	-0.43	0.98	-0.1	0.86	0.18	0.62		0.0335526		-0.736966		-0.303392		0.467126
AT3G13920	eukaryotic translation initiation factor 4A-1	protein_coding	EUKARYOTIC TRANSLATION INITIATION FACTOR 4A1 (EIF4A1)	EUKARYOTIC TRANSLATION INITIATION FACTOR 4A1 (EIF4A1); (TIF4A1); (RH4)	EIF4A1				1.79834	Protein biosynthesis.translation initiation.mRNA loading.eIF4A mRNA unwinding factor	-1.03142	1.03781e-21		0.97932		0.444062	-1.15998	6.07655e-30			-0.08	1	0	0.55	0.03	0.53	-0.05	0.2			-0.15	0.82	-0.44	0.45	0.03	0.46	0.32	0.74		-0.443607		-0.280108		0.302563		0.139064
AT1G30230	Encodes a guanine nucleotide exchange factor that plays an important role in translation elongation. It is localized in the plasma membrane and cytosol. Mutants display ectopic lignin deposition as well as cell expansion defects	protein_coding	EUKARYOTIC ELONGATION FACTOR 1B BETA 1 (EEF-1BB1)	ELONGATION FACTOR 1B BETA (EF1BB);EUKARYOTIC ELONGATION FACTOR 1B BETA 1 (EEF-1BB1)	EEF-1BB1				4.34	Protein biosynthesis.translation elongation.eEF1B eEF1A-GDP-recycling complex.eEF1B-beta/-delta component	-0.586214	6.83459e-05		0.106746		0.153847	-0.577647	3.76422e-05			-0.16	0.015	0.09	0.93	0.13	0.22	-0.12	0.13			-0.14	0.95	-1.74	0.0037	-0.34	0.54	1.25	0.021	-1.01594	-1.01594		-0.204014		0.468149		-0.343779
AT4G35390	AT-hook protein of GA feedback 1	protein_coding	AT-HOOK MOTIF NUCLEAR LOCALIZED PROTEIN 25 (AHL25)	AT-HOOK PROTEIN OF GA FEEDBACK 1 (AGF1);AT-HOOK MOTIF NUCLEAR LOCALIZED PROTEIN 25 (AHL25)	AHL25				0.928899	not assigned.annotated		NA		NA		NA		0.261301													-0.14	0.83	-1.99	0.83	-2.18	0.56	-0.32	0.25
AT3G17850	Protein kinase which together with IRE3 plays an important role in controlling root skewing and maintaining the microtubule network.	protein_coding	NCOMPLETE ROOT HAIR ELONGATION 1 (IREH1)	NCOMPLETE ROOT HAIR ELONGATION 1 (IREH1)	IREH1				1.63882	Protein modification.phosphorylation.AGC kinase superfamily.MAST kinase		0.102671		0.767723		0.769608		0.430122													-0.13	0.81	-0.14	0.76	0.33	0.26	0.34	0.32		0.356694		-0.629632		-0.584963		0.401363
AT5G47430	DWNN domain, a CCHC-type zinc finger	protein_coding							2.09744	RNA processing.RNA 3'-end polyadenylation.Cleavage and Polyadenylation Specificity Factor (CPSF) complex.MPE1 component		0.392213		0.9724		0.987759		0.290339													-0.13	0.73	0.3	0.15	0.65	0.25	0.23	0.7		-0.197939		-0.641546		0.0314782		0.475085
AT5G66540	U3 small nucleolar ribonucleoprotein	protein_coding							2.11163	Protein biosynthesis.cytosolic ribosome.small subunit (SSU).SSU processome.Mpp10 assembly factor	-1.89225	1.18694e-07	0.63203	0.0442102	1.11679	0.00590248	-1.40749	2.43223e-08	-1.74284												-0.12	0.75	0.06	0.58	0.4	0.36	0.22	0.46			-1.25192	-1.25192				0.0558532
AT3G62330	Zinc knuckle (CCHC-type) family protein	protein_coding							2.10019	not assigned.not annotated		0.0839093		0.345564		0.489641		0.925854													-0.12	0.72	-0.46	0.92	-0.48	0.18	-0.14	0.42		-0.720618		-0.70044		-0.0836579		-0.103836
AT4G00238	STKL1 is a DUF domain containing DNA binding protein that may be involved in mediating certain glucose responses. Binds to promoter of PGR, a putative plasma membrane glucose response regulator.	protein_coding	(ATSTKL1)	(ATSTKL1)	ATSTKL1				1.9838	RNA biosynthesis.transcriptional activation.GeBP transcription factor		0.119837		0.530461		0.123853		0.458423													-0.12	0.75	1.21	0.0002	1.07	0.0048	-0.26	0.26		0.553936		-0.145198		-0.577143		0.121991
AT3G52140	Involved in regulating mitochondrial quality control. Regulates mitochondrial association time and thereby is involved in mitochondrial fusion. Mutants show unregulated autophagy and display transcriptomic markers of mitochondrial stress. Its activity can be modulated by Lys acetylation.	protein_coding	NON RESPONDING TO OXYLIPINS 38 (NOXY38)	NON RESPONDING TO OXYLIPINS 38 (NOXY38);FRIENDLY MITOCHONDRIA (FMT); (FRIENDLY)	NOXY38				2.10843	not assigned.annotated	-0.621189	0.00270045	0.467025	0.0303212		0.796115	-0.993944	3.15055e-08			0	0.61	0.17	0.015	0.1	0.53	-0.08	0.2			-0.11	0.95	-0.11	0.95	1.43	0.17	1.43	0.2		-0.29956		-0.912537		-0.152003		0.460974
AT1G56290	CwfJ-like family protein	protein_coding								not assigned.annotated		0.971368		0.347017		0.724907		0.588784													-0.11	0.63	0.41	0.27	1.09	0.1	0.57	0.46		-0.387816		-0.789433		-0.383915		0.017702
AT3G26935	DHHC-type zinc finger family protein	protein_coding							0.786277	not assigned.annotated		0.0866555		0.86425		0.669989		0.324372													-0.11	0.34	0.45	0.2	0.53	0.045	-0.03	0.6		0.341037		-0.473931		-0.471824		0.343145
AT1G18150	Encodes mitogen-activated protein kinase 8 (MPK8). MPK8 connects protein phosphorylation, Ca2+, and ROS in the wound-signaling pathway.	protein_coding	(ATMPK8)	(MPK8); (ATMPK8)	ATMPK8					Protein modification.phosphorylation.CMGC kinase superfamily.MAPK kinase	-0.514472	0.032822		0.771665		0.658095		0.239461													-0.09	0.33	-0.05	0.21	0.13	0.79	0.09	0.13		0.552541		-0.410465		-0.538866		0.42414
AT2G39010	plasma membrane intrinsic protein 2E	protein_coding	PLASMA MEMBRANE INTRINSIC PROTEIN 2E (PIP2E)	PLASMA MEMBRANE INTRINSIC PROTEIN 2;6 (PIP2;6);PLASMA MEMBRANE INTRINSIC PROTEIN 2E (PIP2E)	PIP2E					Solute transport.channels.MIP family.plasma membrane intrinsic protein (PIP-type)		0.233388	-0.640814	0.000425228	-0.752456	2.51063e-05		0.506428			0.24	0.42	0.46	0.011	0.47	0.078	0.25	0.07			-0.09	0.22	-0.8	0.29	0.37	0.94	1.08	0.019		0.181066		-0.0775366		-0.0916305		0.166972
AT3G25070	Encodes a member of the R protein complex and may represent a virulence target of type III pili effector proteins (virulence factors) from bacterial pathogens, which is 'guarded' by R protein complex (RPM1 and RPS2 proteins). RIN4 physically interacts with RPS2 and RPM1 in vivo. Bacterial avirulence (Avr) effectors AvrB, AvrRpm1, and AvrRpt2 induce a mobility shift in RIN4 and expression of AvrRp…	protein_coding	RPM1 INTERACTING PROTEIN 4 (RIN4)	(ATRIN4);RPM1 INTERACTING PROTEIN 4 (RIN4)	RIN4				2.14217	External stimuli response.biotic stress.pathogen effector.ETI (effector-triggered immunity) network.RIN4-RPM1 immune signalling.RIN4 RPM1-interacting factor		0.249383		0.144318		0.947495	0.750703	0.000618685													-0.08	0.043	-0.47	0.74	-0.23	0.11	0.16	0.33		0.726624		0.662965		-0.46073		-0.397071
AT2G17410	AT Rich domain protein.	protein_coding	AT RICH INTERACTION DOMAIN 2 (ARID2)	AT RICH INTERACTION DOMAIN 2 (ARID2)	ARID2					RNA biosynthesis.transcriptional activation.ARID transcription factor		0.988668		0.184203		0.640099		0.528979			0.04	0.77	0.17	0.033	0.01	0.79	-0.13	0.017			-0.08	0.55	-0.72	1	-0.44	0.86	0.2	0.92		-0.121015		-0.661584		-0.202987		0.337581
AT1G10290	involved in trafficking from the trans-Golgi Network to the central vacuole. The mRNA is cell-to-cell mobile.	protein_coding	DYNAMIN-LIKE PROTEIN 6 (ADL6)	DYNAMIN-LIKE PROTEIN 6 (ADL6);DYNAMIN-RELATED PROTEIN 2A (DRP2A)	ADL6				1.70723	Vesicle trafficking.clathrin coated vesicle (CCV) machinery.CCV plasma membrane detachment.DRP2-type dynamin		0.148634		0.150001		0.814979	-0.735826	1.99382e-05			-0.04	0.33	0.12	0.057	0.14	0.022	-0.03	0.5			-0.08	0.83	-0.91	0.11	0.23	0.055	1.05	0.0009		0.36257		-0.222392		-0.0909737		0.493989
AT2G40430	Encodes a homolog of yeast NOP53 that is an important regulator of cell division during organ growth.	protein_coding	SMALL ORGAN 4 (SMO4)	SMALL ORGAN 4 (SMO4)	SMO4					not assigned.annotated	-1.15051	2.83683e-06		0.301486		0.0809888	-0.928917	2.71866e-05	-1.29707												-0.06	0.84	1	0.056	0.05	1	-1.01	0.02		-0.487049		-0.568843		-0.309205		-0.22741
AT5G08610	P-loop containing nucleoside triphosphate hydrolases superfamily protein	protein_coding	PIGMENT DEFECTIVE 340 (PDE340)	PIGMENT DEFECTIVE 340 (PDE340)	PDE340					not assigned.annotated	-0.624844	0.0275336	0.56564	0.0383202		0.914876	-1.24734	2.8075e-08	-1.43541		-0.15	0.44	-0.05	0.73	-0.01	0.91	-0.1	0.77			-0.06	0.27	-0.73	0.39	-0.1	0.64	0.56	0.6		0.0740006	-1.14359	-1.14359		-0.643856		0.573735
AT4G24200	Transcription elongation factor (TFIIS) family protein	protein_coding							2.23141	not assigned.not annotated		0.25237		0.618654		0.659414		0.150416													-0.06	0.96	-0.44	0.37	-0.25	0.5	0.13	0.73		0		-0.685891		-0.32681		0.359081
AT1G62390	Encodes one of the 36 carboxylate clamp (CC)-tetratricopeptide repeat (TPR) proteins (Prasad 2010, Pubmed ID: 20856808) with potential to interact with Hsp90/Hsp70 as co-chaperones.	protein_coding	PHOX2 (Phox2)	CLUMPED CHLOROPLASTS 1 (CLMP1);PHOX2 (Phox2)	Phox2				2.03086	Cytoskeleton.microfilament network.myosin microfilament-based motor protein activities.MadB myosin adaptor protein		0.102118	0.473995	0.0181759		0.828727	-0.757926	1.27039e-05			0.16	0.037	0.33	0.013	0.22	0.8	0.05	0.98			-0.05	0.86	0.06	0.97	-0.18	0.5	-0.3	0.63		-0.410465		-0.736966		-0.0749621		0.251539
AT5G11260	Basic leucine zipper (bZIP) transcription factor. Nuclear localization. Involved in light-regulated transcriptional activation of G-box-containing promoters. Negatively regulated by Cop1. Although cytokinins do not appear to affect the gene's promoter activity, they appear to stabilize the protein. HY5 plays a role in anthocyanin accumulation in far-red light and blue light, but not in red light …	protein_coding	ELONGATED HYPOCOTYL 5 (HY5)	ELONGATED HYPOCOTYL 5 (HY5);REVERSAL OF THE DET PHENOTYPE 5 (TED 5)	HY5				3.17885	External stimuli response.light.UV-B light.UV-B signal transduction transcriptional regulator	0.782604	0.0459276		0.772646		0.466668		0.540561	1.26708												-0.03	0.52	0.71	0.58	0.9	0.0062	0.16	0.6		-0.876852		-0.488286		0.567368		0.178803
AT1G47200	WPP family members contains an NE targeting domain. This domain, called the WPP domain after a highly conserved Trp-Pro-Pro motif, is necessary for NE targeting of WPP1. RNAi suppression of WPP2 resulted in reduced mitotic activity.	protein_coding	WPP DOMAIN PROTEIN 2 (WPP2)	WPP DOMAIN PROTEIN 2 (WPP2)	WPP2					not assigned.annotated		0.375905		0.978772		0.693125		0.638276			-0.05	0.88	0.12	0.043	0.14	0.19	-0.04	0.79			-0.03	0.55	-0.42	0.053	-0.39	0.045	0	0.61		0.574694		0.200299		-0.344648		0.0297473
AT2G46820	Encodes the P subunit of Photosystem I. About 25% of the TMP14 pool appeared to be phosphorylated, and this ratio is not affected by light. Contains seven phosphorylation sites on threonine residue and chloroplast targeting signal. Located in the proximity of PSI-L, -H and -O subunits.	protein_coding	PHOTOSYSTEM I P SUBUNIT (PSI-P)	PLASTID TRANSCRIPTIONALLY ACTIVE 8 (PTAC8);THYLAKOID MEMBRANE PHOSPHOPROTEIN OF 14 KDA (TMP14);CURVATURE THYLAKOID 1B (CURT1B);PHOTOSYSTEM I P SUBUNIT (PSI-P); (PSAP)	PSI-P					not assigned.annotated	0.519826	0.0204669	-0.923263	5.97474e-06	-0.755855	0.000396103	0.687235	0.00074504			0.41	0.0092	0.39	0.039	0.36	0.032	0.38	0.0009			-0.02	0.43	-1.18	0.06	-0.14	0.21	1.02	0.0039		0.16665		0.528248		0.0388192		-0.322779
AT3G63000	NPL4-like protein 1	protein_coding	NPL4-LIKE PROTEIN 1 (NPL41)	NPL4-LIKE PROTEIN 1 (NPL41)	NPL41				1.69091	not assigned.annotated	0.981649	0.0001075		0.395961		0.355534	0.9636	3.11927e-05		0.152876											-0.02	0.51	0.18	0.51	-0.08	1	-0.28	0.25		0.0919225		0.161463		0.511899		0.442358
AT3G13200	Cwf15 / Cwc15 cell cycle control family protein	protein_coding	EMBRYO DEFECTIVE 2769 (EMB2769)	EMBRYO DEFECTIVE 2769 (EMB2769)	EMB2769					not assigned.not annotated		0.332521		0.795598		0.976169		0.0790564													-0.02	0.91	-0.34	0.17	0.05	0.64	0.37	0.034		-0.141472		-0.54201		-0.412126		-0.011588
AT1G35160	GF14 protein phi chain member of 14-3-3 protein family. This protein is reported to interact with the BZR1 transcription factor involved in brassinosteroid signaling and may affect the nucleocytoplasmic shuttling of BZR1 The mRNA is cell-to-cell mobile.	protein_coding	GF14 PROTEIN PHI CHAIN (GF14 PHI)	GF14 PROTEIN PHI CHAIN (GF14 PHI)	GF14 PHI					not assigned.annotated		0.0537063		0.132943		0.187147	-0.387193	0.0152872			-0.02	0.79	0.08	0.25	0.05	0.67	-0.05	0.26			-0.01	0.91	-1.09	0.0084	-0.9	0.01	0.17	0.41		-0.102035		-0.234091		-0.0933368		0.03872
AT2G20190	Encodes a microtubule-associated protein that is involved in both cell division and cell expansion. It likely promotes microtubule stability.	protein_coding	CLIP-ASSOCIATED PROTEIN (CLASP)	CLIP-ASSOCIATED PROTEIN (CLASP);CLIP-ASSOCIATED PROTEIN (ATCLASP)	CLASP					Cell cycle.cytokinesis.preprophase microtubule organization.CLASP microtubule orientation regulator		0.501094		0.901043		0.225288	-0.307742	0.0169935			-0.02	0.69	-0.05	0.74	0.03	0.64	0.06	0.82			-0.01	0.61	-0.18	0.54	0.93	0.043	1.1	0.012		0.0142139		-0.658211		-0.246161		0.426265
AT1G49760	polyadenylate-binding protein, putative / PABP, putative, similar to poly(A)-binding protein GB:AAF66825 GI:7673359 from (Nicotiana tabacum). Highly and ubiquitously expressed. Member of the class II PABP family.	protein_coding	POLY(A) BINDING PROTEIN 8 (PAB8)	POLY(A) BINDING PROTEIN 8 (PABP8);POLY(A) BINDING PROTEIN 8 (PAB8)	A				2.32459	Protein biosynthesis.translation initiation.mRNA loading.PABP mRNA poly-A-tail binding factor	-1.2834	1.13585e-11	0.450561	0.0338026		0.827921	-1.649	3.34765e-22		-1.36127	-0.01	0.81	0.2	0.018	0.22	0.011	0.02	0.79			0	--	0	--	0	--	0	--	-1.05063	-1.05063		-0.493409		0.61891		0.0616923
AT5G58220	Encodes a transthyretin-like S-allantoin synthase protein that catalyzes two steps in the allantoin biosynthesis pathway by acting as a hydroxyisourate hydrolase and a 2-oxo-4-hydroxy-4-carboxy-5-ureidoimidazoline (OHCU) decarboxylase. Two alternatively spliced versions of the transcript give rise to a longer peroxisomally-targeted protein (AT5G58220.1 (called TTL1-)) and a slightly shorter cytop…	protein_coding	TRANSTHYRETIN-LIKE PROTEIN (TTL)	ALLANTOIN SYNTHASE (ALNS);TRANSTHYRETIN-LIKE PROTEIN (TTL)	TTL				0.096054	Nucleotide metabolism.purines.catabolism.S-allantoin synthase (TTL)		0.814129		0.875653		0.641673		0.963346													0	--	0	--	0	--	0	--		0.482782		0.33665		-0.205942		-0.0598094
AT2G19490	recA DNA recombination family protein	protein_coding	A. THALIANA RECA HOMOLOG 2 (RECA2)	A. THALIANA RECA HOMOLOG 2 (RECA2)	RECA2					Cell cycle.organelle machineries.DNA replication.genome stability maintenance.RecA-type recombinase		0.214735		0.13367		0.575152	-1.41963	0.0065308	-2.17983												0	--	0	--	0	--	0	--
AT2G07360	TPLATE-associated SH3 domain containing protein.	protein_coding	TPLATE-ASSOCIATED SH3 DOMAIN CONTAINING PROTEIN (TASH3)	TPLATE-ASSOCIATED SH3 DOMAIN CONTAINING PROTEIN (TASH3)	TASH3					Vesicle trafficking.clathrin coated vesicle (CCV) machinery.TPLATE AP-2 co-adaptor complex.TASH3 component		0.664246		0.0639682		0.924169	-0.437236	0.00890818			-0.07	0.79	-0.01	0.42	-0.02	0.19	-0.08	0.57			0.02	0.41	-0.03	0.35	0.12	0.085	0.17	0.11		-0.241008		-0.70044		-0.221027		0.238405
AT5G25780	member of eIF3b - eukaryotic initiation factor 3b	protein_coding	EUKARYOTIC TRANSLATION INITIATION FACTOR 3B-2 (EIF3B-2)	EUKARYOTIC TRANSLATION INITIATION FACTOR 3B-2 (EIF3B-2); (ATEIF3B-2);EUKARYOTIC TRANSLATION INITIATION FACTOR 3B (EIF3B)	EIF3B-2					Protein biosynthesis.translation initiation.pre-initiation complex (PIC).eIF3 mRNA-to-PIC binding complex.eIF3b component	-0.98932	0.00100944	0.778075	0.00665413		0.185122	-1.27293	2.48307e-07	-1.07424												0.03	0.5	-0.31	0.5	-0.09	0.57	0.25	0.53		-0.0699626	-1.31342	-1.31342		-0.466731		0.776723
AT4G02720	Encodes an ortholog of NKAP (NF-kB activating protein), that interacts with splicing and ribosome biogenesis proteins, colocalizes with the 45S rDNA at the nucleolar organizer regions (NORs) and negatively regulates 45S rDNA expression.	protein_coding	MORPHOLOGY OF AGO1-52 SUPPRESSED2 (MAS2)	MORPHOLOGY OF AGO1-52 SUPPRESSED2 (MAS2)	MAS2					not assigned.not annotated																					0.03	0.52	0.21	0.86	0.04	0.86	-0.13	0.35		-0.10561		-0.68147		0.258462		0.834322
AT3G48430	Relative of Early Flowering 6 (REF6) encodes a Jumonji N/C and zinc finger domain-containing protein that acts as a positive regulator of flowering in an FLC-dependent pathway. REF6 mutants have hyperacetylation of histone H4 at the FLC locus. REF6 interacts with BES1 in a Y2H assay and in vitro. REF6 may play a role in brassinoteroid signaling by affecting histone methylation in the promoters of…	protein_coding	RELATIVE OF EARLY FLOWERING 6 (REF6)	RELATIVE OF EARLY FLOWERING 6 (REF6);JUMONJI DOMAIN-CONTAINING PROTEIN 12 (JMJ12)	REF6				1.26541	RNA biosynthesis.transcriptional activation.JUMONJI transcription factor		0.815393		0.151775		0.944007		0.335014													0.03	0.055	-0.28	0.068	0.61	0.1	0.92	0.047		0.0418202		-0.917538		-0.24664		0.712718
AT5G62810	mutant has a defect in the intracellular transport of thiolase from the cytosol to glyoxysomes (formerly known as ped2) The mRNA is cell-to-cell mobile.	protein_coding	PEROXIN 14 (PEX14)	PEROXIN 14 (PEX14); (ATPED2);PEROXISOME DEFECTIVE 2 (PED2); (ATPEX14)	PEX14					Protein translocation.peroxisome.importomer translocation system.cargo-receptor docking complex.Pex14 component		0.0589036	-0.462632	0.0085095	-0.490184	0.00521945		0.0576902			0.28	0.026	0.41	0	0.14	0.27	0.01	0.6			0.04	0.31	-0.14	0.88	1.63	0.1	1.81	0.009		-0.10218		-0.0248747		0.0455969		-0.0317089
AT3G56860	encodes a nuclear protein that binds to RNA with a specificity for oligouridylates in vitro. Along with UBP1 and UBA1a, it may act as a component of a complex recognizing U-rich sequences in plant 3'-UTRs and contributing to the stabilization of mRNAs in the nucleus.	protein_coding	UBP1-ASSOCIATED PROTEIN 2A (UBA2A)	UBP1-ASSOCIATED PROTEIN 2A (UBA2A)	UBA2A					not assigned.annotated		0.935352		0.761139		0.307293		0.364438			-0.09	0.51	0.11	0.56	0.01	0.83	-0.19	0.25			0.04	0.96	-0.08	0.79	0.44	0.92	0.57	0.64		0.341037		-0.473931		-0.284453		0.530515
AT2G44440	Emsy N Terminus (ENT) domain-containing protein	protein_coding	EMSY-LIKE 4 (EML4)	(AtEML4);EMSY-LIKE 4 (EML4)	EML4					not assigned.annotated		0.239431		0.564452		0.374671		0.289697													0.05	0.75	-0.34	1	0.75	0.2	1.13	0.25								-0.284729
AT1G33990	Encodes a protein predicted to act as a carboxylesterase. It has similarity to the SABP2 methyl salicylate esterase from tobacco. This protein does not act on methyl IAA, methyl JA, MeSA, MeGA4, or MEGA9 in vitro.	protein_coding	METHYL ESTERASE 14 (MES14)	METHYL ESTERASE 14 (ATMES14);METHYL ESTERASE 14 (MES14)	MES14					not assigned.annotated		0.28182		0.238707		0.932422		0.920347													0.06	0.4	-0.13	0.31	-0.09	0.77	0.1	0.42		0.403722		0.0297473		-0.403722		-0.0297473
AT3G05900	neurofilament protein-like protein	protein_coding							3.04612	not assigned.not annotated											-0.12	0.096	0.02	0.019	0.12	0.0051	-0.02	0.18			0.06	0.82	-0.5	0.084	-0.15	0.65	0.4	0.15		-0.121136		-0.604459		-0.297132		0.18619
AT1G17720	type 2A protein serine/threonine phosphatase 55 kDa B	protein_coding	(ATB BETA)	(ATB BETA)	ATB BETA				0.962199	Protein modification.dephosphorylation.serine/threonine protein phosphatase superfamily.PPP Fe-Zn-dependent phosphatase families.PP2A phosphatase complexes.B-type regulatory component		0.386801		0.416635		0.468132		0.276621			-0.07	0.42	-0.02	0.58	0.01	0.75	-0.05	0.58			0.06	0.51	0.47	1	0.24	0.51	-0.17	0.56		0.325576		-0.281413		-0.353232		0.253757
AT3G63400	Cyclophilin-like peptidyl-prolyl cis-trans isomerase family protein	protein_coding							1.66506	Protein modification.protein folding and quality control.protein folding catalyst activities.Cyclophilin protein folding catalyst		0.734876		0.21508		0.89267	-0.621964	0.0172464													0.06	0.83	-0.3	0.83	0.25	0.56	0.61	0.56		0.0715533		-0.67319		-0.430634		0.314109
AT2G20790	clathrin adaptor complexes medium subunit family protein	protein_coding								Vesicle trafficking.endomembrane trafficking.protein recycling.AP-5 cargo adaptor complex.AP5M medium mu subunit		0.879407		0.238339		0.989483		0.0960603													0.06	0.52	0.15	0.2	0.16	0.86	0.08	0.75		-0.219566		-0.526748		0.277781		0.584963
AT2G37340	encodes an RS-containing Zinc knuckle protein with molecular mass of 33kDa that is localized to nuclear specks. Barta et al (2010) have proposed a nomenclature for Serine/Arginine-Rich Protein Splicing Factors (SR proteins): Plant Cell. 2010, 22:2926.	protein_coding	ARGININE/SERINE-RICH ZINC KNUCKLE-CONTAINING PROTEIN 33 (RS2Z33)	ARGININE/SERINE-RICH ZINC KNUCKLE-CONTAINING PROTEIN 33 (RSZ33);ARGININE/SERINE-RICH ZINC KNUCKLE-CONTAINING PROTEIN 33 (atRSZ33);ARGININE/SERINE-RICH ZINC KNUCKLE-CONTAINING PROTEIN 33 (RS2Z33);ARGININE/SERINE-RICH ZINC KNUCKLE-CONTAINING PROTEIN 33 (AT-RS2Z33)	RS2Z33					RNA processing.RNA splicing.spliceosome-associated non-snRNP factors.RSZ32/33 splicing factor		0.860166		0.104542	-0.644228	0.00485121		0.17828													0.07	0.39	-0.57	0.76	-0.12	0.84	0.53	0.7		-0.576501		-0.10561		0.567989		0.0970987
AT1G12910	Encodes LIGHT-REGULATED WD1 (LWD1), a clock proteins regulating circadian period length and photoperiodic flowering.	protein_coding	ANTHOCYANIN11 (ATAN11)	LIGHT-REGULATED WD 1 (LWD1);ANTHOCYANIN11 (ATAN11)	ATAN11					Multi-process regulation.circadian clock.morning element regulation.LWD activation factor		0.149141		0.865824		0.341491		0.490876	1.20724												0.1	0.4	0.67	0.87	1.67	0.016	1.1	0.049		-0.0690416		0.356565		0.0824622		-0.343145
AT5G06160	Encodes a protein with similarity to pre-mRNA splicing factor SF3a60 that is involved in gametic cell fate determination. Loss of function results in the ectopic expression of egg cell makers suggesting a role in restriction of gametic cell fate. Expressed strongly in gametophytes and weakly in sporophytes.	protein_coding	ATROPOS (ATO)	ATROPOS (ATO)	ATO				1.19232	RNA processing.RNA splicing.U2-type-intron-specific major spliceosome.U2 small nuclear ribonucleoprotein particle (snRNP).splicing factor 3A complex.SF3A3 component		0.584797	0.608104	0.0174574		0.530829	-0.584998	0.00829203			-0.11	0.34	0.03	1	0.22	0.2	0.08	0.92			0.11	0.72	0.4	0.96	1.33	0.34	1.04	0.23		0.328422		-0.516124		-0.768994		0.075551
AT1G16970	Ku80 and ku70 form the heterodimer complex Ku, required for proper maintenance of the telomeric C strand. Ku regulates the extension of the telomeric G strand. Interacts with WEX, and this interaction stimulates the WEX exonuclease activity.	protein_coding	KU70 HOMOLOG (KU70)	ARABIDOPSIS THALIANA KU70 HOMOLOG (ATKU70);KU70 HOMOLOG (KU70)	KU70					DNA damage response.DNA repair mechanisms.nonhomologous end-joining repair (NHEJ).Ku70-Ku80 helicase complex.KU70 component		0.108962		0.348132		0.210012		0.122108													0.11	0.75	-1.37	0.86	22.64	0.045	24.12	0.047				-0.507604				0.749082
AT2G17560	Encodes a protein belonging to the subgroup of HMGB (high mobility group B) proteins that have a distinctive DNA-binding motif, the HMG-box domain. The motif confers non-sequence specific interaction with linear DNA and structure-specific binding to distorted DNA sites. The HMGB proteins are involved in the assembly of nucleoprotein complexes. Can be phosphorylated by CK2alpha.	protein_coding	HIGH MOBILITY GROUP B4 (HMGB4)	HIGH MOBILITY GROUP B4 (HMGB4); (NFD04);NUCLEOSOME/CHROMATIN ASSEMBLY FACTOR D4 (NFD4)	HMGB4					not assigned.annotated		0.638441		0.593527	0.480859	0.0206492		0.325972													0.12	0.44	0.33	0.31	0.59	0.021	0.37	0.08		-0.0690925		-0.21205		-0.476201		-0.333243
AT1G59870	ATP binding cassette transporter. Localized to the plasma membrane in uninfected cells. In infected leaves, the protein concentrated at infection sites. Contributes to nonhost resistance to inappropriate pathogens that enter by direct penetration in a salicylic acid?dependent manner. Required for mlo resistance. Has Cd transporter activity (Cd2+ extrusion pump) and contributes to heavy metal resi…	protein_coding	PENETRATION 3 (PEN3)	PENETRATION 3 (PEN3);PLEIOTROPIC DRUG RESISTANCE 8 (PDR8);ARABIDOPSIS THALIANA ATP-BINDING CASSETTE G36 (ATABCG36);ATP-BINDING CASSETTE G36 (ABCG36);ARABIDOPSIS PLEIOTROPIC DRUG RESISTANCE 8 (ATPDR8)	PEN3				8.4714	Solute transport.primary active transport.ABC superfamily.ABC2 family.subfamily ABCG transporter	1.06532	8.48838e-13		0.802914		0.941876	0.973321	3.91125e-11		1.41412	0.12	0.12	-0.07	0.24	-0.08	0.13	0.11	0.12			0.12	0.53	-0.82	0.047	-0.38	0.042	0.56	0.014		0.0381351		-0.741266		-0.201634		0.577767
AT3G19960	member of Myosin-like proteins	protein_coding	MYOSIN 1 (ATM1)	MYOSIN 1 (ATM1)	ATM1					Cytoskeleton.microfilament network.myosin microfilament-based motor protein activities.class VIII myosin		0.156538		0.984904		0.952169		0.10671													0.13	0.35	0.24	0.56	0.06	0.85	-0.05	0.56		-0.0551416		-0.736966		-0.106915		0.574909
AT5G51820	Encodes a plastid isoform of the enzyme phosphoglucomutase involved in controlling photosynthetic carbon flow. Effective petiole movement against the direction of the gravity requires functional PGM activity that is required for full development of amyloplasts.	protein_coding	PHOSPHOGLUCOMUTASE (PGM)	(PGM1);PHOSPHOGLUCOMUTASE (PGM);ARABIDOPSIS THALIANA PHOSPHOGLUCOMUTASE (ATPGMP);STARCH-FREE 1 (STF1)	PGM				1.65217	Carbohydrate metabolism.starch metabolism.synthesis.plastidial phosphoglucomutase		0.498281		0.0639686		0.901019	-0.644924	0.00315114			-0.28	0.027	-0.39	0	-0.12	0.0088	-0.01	0.81			0.13	0.51	0.65	0.83	0.01	0.56	-0.51	0.56		-0.104869	-1.08215	-1.08215		-0.344285		0.632995
AT3G17170	Translation elongation factor EF1B/ribosomal protein S6 family protein	protein_coding	REGULATOR OF FATTY-ACID COMPOSITION 3 (RFC3)	REGULATOR OF FATTY-ACID COMPOSITION 3 (RFC3)	RFC3				2.67836	not assigned.not annotated	-0.9088	0.0019611		0.176017		0.161817	-0.829166	0.000619845	-1.29677	-1.48294	0.3	0.32	0.33	0.088	0.27	0.16	0.24	0.24			0.14	0.94	0.69	0.2	0.14	0.58	-0.41	0.46		-0.109878		-0.836501		-0.397842		0.328782
AT1G65010	Encodes a microtubule-associated protein. Putative role in flower development. Comparison of SALK_061426C to Columbia wild type in normal lighting and under low light of 33 micromoles per meter-squared per second resulted in a trend toward earlier bolting in the mutant under low light (P=0.055) (Ann Stapleton and Patrick Pridgen, 2009, personal communication).	protein_coding							1.37596	not assigned.annotated		0.278601	0.374188	0.0318501		0.641899		0.901301	-1.1224	-1.20968	-0.27	0.83	0.69	0.51	0.9	0.56	-0.06	0.56			0.16	0.76	0.11	0.63	0.11	0.79	0.16	0.42		-0.0506261	-1.18556	-1.18556		-0.588186		0.546743
AT3G51880	Encodes a protein belonging to the subgroup of HMGB (high mobility group B) proteins that have a distinctive DNA-binding motif, the HMG-box domain. The motif confers non-sequence specific interaction with linear DNA and structure-specific binding to distorted DNA sites. The HMGB proteins are involved in the assembly of nucleoprotein complexes. Can be phosphorylated by CK2alpha. In interphase cell…	protein_coding	HIGH MOBILITY GROUP B1 (HMGB1)	HIGH MOBILITY GROUP B1 (HMGB1);NUCLEOSOME/CHROMATIN ASSEMBLY FACTOR D1 (NFD1); (AtHMGB1)	HMGB1				3.93101	not assigned.annotated		0.819377		0.724283		0.761313		0.770123													0.16	0.55	-0.02	0.53	-0.05	0.64	0.13	0.61		-0.714843		-0.594549		0.169925		0.0496308
AT1G34320	Ikzf5 (DUF668)	protein_coding	PSK SIMULATOR 1 (PSI1)	PSK SIMULATOR 1 (PSI1)	PSI1				2.15218	not assigned.not annotated		0.302345		0.651716		0.393317		0.72975													0.16	0.52	0.27	0.36	0.31	0.36	0.2	0.12		0.36257		-0.405256		-0.235813		0.532014
AT5G08450	Component of histone-deacetylase complexes. Interacts with HDA6 and HDA19 and facilitates histone deacetylation. Several salt-inducible genes are de-repressed in hdc1 mutants. Mutants are hypersensitive to ABA during germination, grow less and flower later than wildtype. HDC1-overexpressing plants display opposite phenotypes.	protein_coding	HISTONE DEACETYLATION COMPLEX 1 (HDC1)	RXT3-LIKE (RXT3-LIKE);HISTONE DEACETYLATION COMPLEX 1 (HDC1)	HDC1					Chromatin organisation.histone modifications.histone deacetylation.histone deacetylase machineries.HDC1/Rxt3 associated component		0.0845252		0.331781		0.272291		0.634355			0.12	0.75	0.35	0.52	0.65	0.83	0.41	0.67			0.17	0.62	1.14	0.14	1.69	0.00057	0.72	0.57		0.0422282		-0.751321		-0.192645		0.600904
AT5G14540	basic salivary proline-rich-like protein (DUF1421)	protein_coding							0.676292	not assigned.not annotated	0.565927	0.025414	-0.668147	0.00693473	-0.748685	0.0013996	0.485389	0.0410132			0	0.99	0.11	0.25	0.17	0.026	0.05	0.93			0.18	0.28	14.92	0.25	-0.53	0.28	-15.26	0.25		0.251918		0.812768		0.307509		-0.253341
AT4G20400	Encodes a histone H3K4 demethylase repressing floral transition.Coordinates and structure features have been deposited in the RCSB Protein Data Bank with the accession codes 5YKN (JMJ14CD) and 5YKO(JMJ14CD-NOG-H3K4em3 complex). Glu285 and Glu516 contribute to the recognition of H3R2. Asp312 contributes to the recognition of H3Q5. Phe171 and Val363 contribute to the recognition of H3A7. Ser290, Tr…	protein_coding	JUMONJI 14 (JMJ14)	(PKDM7B);JUMONJI 14 (JMJ14)	JMJ14					RNA biosynthesis.transcriptional activation.JUMONJI transcription factor		0.536363	0.413275	0.0328398		0.8428		0.384139													0.18	0.1	0.61	0.31	0.33	0.15	-0.11	0.49		-0.0310269		-0.696608		-0.363691		0.30189
AT5G52310	cold regulated gene, the 5' region of cor78 has cis-acting regulatory elements that can impart cold-regulated gene expression The mRNA is cell-to-cell mobile.	protein_coding	LOW-TEMPERATURE-INDUCED 78 (LTI78)	COLD REGULATED 78 (COR78);LOW-TEMPERATURE-INDUCED 78 (LTI78); (LTI140);RESPONSIVE TO DESICCATION 29A (RD29A)	LTI78				0.360814	not assigned.annotated	0.863691	0.00446626	0.762457	0.0140801		0.575978		0.304952			0.01	0.74	-0.12	0.006	-0.16	0.051	-0.04	0.65			0.19	0.42	0.01	0.47	-0.48	0.58	-0.3	0.6		-0.354843		-0.680243		-0.257496		0.0679041
AT5G57110	Arabidopsis-autoinhibited Ca2+ -ATPase, isoform 8, contains all of the characteristic motifs of Ca2+ -transporting P-type Ca2+ -ATPases and is localized to the plasma membrane.	protein_coding	AUTOINHIBITED CA2+ -ATPASE, ISOFORM 8 (ACA8)	AUTOINHIBITED CA2+ -ATPASE, ISOFORM 8 (AT-ACA8);"AUTOINHIBITED CA2+ -ATPASE, ISOFORM 8" (ACA8)	ACA8					Solute transport.primary active transport.P-type ATPase superfamily.P2 family.ACA P2B-type calcium cation-transporting ATPase		0.734624	1.06184	4.08948e-08	0.545827	0.0182105	-0.396693	0.0488059			0.03	0.46	0.45	0	0.51	0.00035	0.1	0.45			0.19	0.35	1.21	0.023	0.77	0.18	-0.26	0.25		-0.189478		-0.913843		-0.538269		0.186096
AT1G76970	Target of Myb protein 1	protein_coding							0.953801	Vesicle trafficking.endomembrane trafficking.protein recycling.ubiquitylated cargo adaptors.TOM associated protein	1.2318	0.00240577	0.90262	0.0297203		0.743352		0.136163		1.36232											0.2	0.75	-1.15	0.36	-0.3	0.58	1.06	0.028						-0.0261839		0.406257
AT5G44090	Calcium-binding EF-hand family protein	protein_coding							1.83472	Protein modification.dephosphorylation.serine/threonine protein phosphatase superfamily.PPP Fe-Zn-dependent phosphatase families.PP2A phosphatase complexes.B2-type regulatory component		0.522169		0.683981		0.727719		0.862008													0.2	0.63	0.28	0.47	1.26	0.14	1.18	0.25		-0.38247	-1.18982	-1.18982		-0.156303		0.651052
AT5G66570	Encodes a protein which is an extrinsic subunit of photosystem II and which has been proposed to play a central role in stabilization of the catalytic manganese cluster. In <i>Arabidopsis thaliana</i> the PsbO proteins are encoded by two genes: <i>psbO1</i> and <i>psbO2</i>. PsbO1 is the major isoform in the wild-type. In plsp1-1 mutant plastids, the nonmature form of the protein localizes in the…	protein_coding	PS II OXYGEN-EVOLVING COMPLEX 1 (PSBO1)	PS II OXYGEN-EVOLVING COMPLEX 1 (PSBO-1);33 KDA OXYGEN EVOLVING POLYPEPTIDE 1 (OEE1);MANGANESE-STABILIZING PROTEIN 1 (MSP-1);OXYGEN EVOLVING COMPLEX 33 KILODALTON PROTEIN (OE33);PS II OXYGEN-EVOLVING COMPLEX 1 (PSBO1);OXYGEN EVOLVING ENHANCER PROTEIN 33 (OEE33)	PSBO1				0.945622	Photosynthesis.photophosphorylation.photosystem II.PS-II complex.oxygen-evolving center (OEC) extrinsic proteins.OEC33 component PsbO		0.476553	-0.846089	0.000114601	-1.02413	2.02929e-06		0.913382			-0.07	0.22	-0.39	0	-0.13	0.036	0.19	0.0077			0.21	0.83	-1.03	0.28	-2.41	0.083	-1.18	0.25		0.201634		-0.169925		0.1676		0.539159
AT5G46840	RNA-binding (RRM/RBD/RNP motifs) family protein	protein_coding							8.81576	not assigned.not annotated		0.295642		0.0752701		0.426403	-0.593179	0.0212696													0.21	0.52	0.14	0.72	0.39	0.36	0.46	0.009		-0.928917		-0.956931		-0.0139392		0.0140752
AT1G59610	A high molecular weight GTPase whose GTP-binding domain shows a low homology to those of other plant dynamin-like proteins.Contains a pleckstrin homologous domain. DRP2B and DRP1A participate together in clathrin-coated vesicle formation during endocytosis. The mRNA is cell-to-cell mobile.	protein_coding	DYNAMIN-LIKE 3 (DL3)	DYNAMIN-LIKE 3 (ADL3);DYNAMIN-LIKE 3 (DL3);DYNAMIN RELATED PROTEIN 2B (DRP2B)	DL3				0.910959	Vesicle trafficking.clathrin coated vesicle (CCV) machinery.CCV plasma membrane detachment.DRP2-type dynamin		0.335689		0.18886		0.833343		0.615177			-0.1	0.69	0.25	0.13	0.65	0.00066	0.3	0.064			0.21	0.64	0.01	0.77	0.69	0.036	0.89	0.00033		-0.0901978		-0.652077		-0.260709		0.30117
AT5G45500	RNI-like superfamily protein	protein_coding								not assigned.annotated		0.91675		0.325629		0.677335		0.562173			-0.15	0.17	-0.12	0.58	0.09	0.72	0.07	0.75			0.23	1	-2.82	0.47	-0.24	0.72	2.82	0.17		-0.415037		-0.704544		-0.192645		0.0968615
AT4G28990	RNA-binding protein-like protein	protein_coding								not assigned.not annotated		0.24797		0.92146		0.16576	-1.2453	0.000344003													0.25	0.42	0.22	0.43	0.29	0.075	0.33	0.082		-0.207325		-0.838938		0.476028	1.10764	1.10764
AT5G45510	Leucine-rich repeat (LRR) family protein	protein_coding							0.2923	not assigned.annotated		0.81804		0.243042		0.692349		0.33299			0.01	0.71	0.44	0	0.47	0	0.04	0.37			0.26	0.73	0.65	0.39	0.41	0.16	0.02	0.87		0.109624		-0.520007		-0.368867		0.260764
AT4G30480	Encodes one of the 36 carboxylate clamp (CC)-tetratricopeptide repeat (TPR) proteins (Prasad 2010, Pubmed ID: 20856808). Interacts with Hsp90/Hsp70 as co-chaperone.	protein_coding	TETRATRICOPEPTIDE REPEAT 1 (TPR1)	(AtTPR1);TETRATRICOPEPTIDE REPEAT 1 (TPR1)	TPR1				1.43273	not assigned.not annotated		0.121753		0.980061		0.942649		0.0698975													0.31	0.73	0.82	0.32	0.25	0.13	-0.27	0.43		0.133583		-0.324622		-0.61471		-0.156504
AT3G49140	Pentatricopeptide repeat (PPR) superfamily protein	protein_coding								not assigned.annotated		0.0586515		0.509186		0.945478	-0.50022	0.00100228			-0.23	0.031	0.19	0.047	0.29	0.0015	-0.13	0.11			0.31	0.34	0.17	0.58	-0.34	0.2	-0.2	0.35		-0.378512		-0.922832		-0.140598		0.403722
AT3G53030	Encodes a protein kinase SRPK4 that specifically targets Arabidopsis Ser/Arg-rich (SR) slicing factors involved in RNA metabolism. In vitro kinase assay showed that SRPK4 phosphorylates the SR protein RSp31.	protein_coding	SER/ARG-RICH PROTEIN KINASE 4 (SRPK4)	SER/ARG-RICH PROTEIN KINASE 4 (SRPK4)	SRPK4				0.674301	Protein modification.phosphorylation.CMGC kinase superfamily.SRPK kinase	0.725081	0.022407		0.100097		0.925308		0.673943													0.32	0.63	0.41	0.2	-0.11	0.72	-0.2	0.25		-0.251979	-1.11548	-1.11548		-0.169237		0.694261
AT1G68790	Member of small gene family in Arabidopsis containing 4 members (LNC1-4 or CRWN 1-4) with redundant functions in protection from oxidative damage, control of nuclear morphology and degradation of ABI5.	protein_coding	LITTLE NUCLEI3 (LINC3)	LITTLE NUCLEI3 (LINC3);CROWDED NUCLEI 3 (CRWN3)	LINC3				0.950907	Cytoskeleton.cytoskeleton-nucleoskeleton linking.nuclear lamina.CRWN lamin-like protein		0.213038		0.095241		0.533	-0.4431	0.00750975			0.1	0.42	0.3	0.099	0.36	0.11	0.15	0.5			0.32	0.73	-0.67	0.79	0.09	0.74	1.08	1		0.239188		-0.843274		-0.375509		0.706953
AT1G12000	Phosphofructokinase family protein	protein_coding							0.735868	Cellular respiration.glycolysis.cytosolic glycolysis.phosphofructokinase activities.pyrophosphate-dependent phosphofructokinase		0.230042	0.466282	0.00743111		0.264087	-0.474815	0.00303981	-1.49186		-0.33	0.0071	0.01	0.85	0.41	0.00025	0.06	0.25			0.33	0.099	0.85	0.0048	0.5	0.11	-0.02	0.89		-0.0241125		-0.70543		-0.351612		0.329705
AT2G04410	RPM1-interacting protein 4 (RIN4) family protein	protein_coding								not assigned.not annotated		0.284518		0.0756752		0.962538		0.731661													0.34	0.35	-0.02	0.87	-0.03	0.85	0.33	0.049		0.096676		0.136204		-0.574978		-0.614507
AT1G24706	Encodes a component of the putative Arabidopsis THO/TREX complex: THO1 or HPR1 (At5g09860), THO2 (At1g24706), THO3 or TEX1 (At5g56130), THO5 (At5g42920, At1g45233), THO6 (At2g19430), and THO7 (At5g16790, At3g02950). THO/TREX complexes in animals have been implicated in the transport of mRNA precursors. Mutants of THO3/TEX1, THO1, THO6 accumulate reduced amount of small interfering (si)RNA, sugges…	protein_coding	(THO2)	(THO2);EMBRYO DEFECTIVE 2793 (EMB2793)	THO2				1.1502	RNA processing.messenger ribonucleoprotein particle (mRNP).mRNP export.TREX/THO mRNP trafficking complex.THO subcomplex.THOC2/Tho2 component		0.728938		0.0600852		0.467561	-0.490175	0.00803466													0.34	0.63	-0.12	0.72	0.34	0.47	0.8	0.6		0.0506261	-1.18286	-1.18286		-0.40952		0.82397
AT1G70770	transmembrane protein (Protein of unknown function DUF2359, transmembrane)	protein_coding								not assigned.not annotated	-0.583544	0.00633496	0.748057	0.000115412	0.527418	0.0186997	-0.804182	6.94741e-06			0.08	0.34	0.27	0.037	0.13	0.19	-0.06	0.85			0.35	0.16	0.63	0.0073	0.59	0	0.3	0.038		-0.567368		-0.567368		-0.234465		-0.234465
AT5G46070	Guanylate-binding family protein	protein_coding	GUANYLATE-BINDING PROTEIN-LIKE 3 (GBPL3)	GUANYLATE-BINDING PROTEIN-LIKE 3 (GBPL3)	GBPL3					not assigned.not annotated		0.204597		0.112741		0.443354	-0.501921	0.0213171			0.14	0.12	0.19	0.1	0	0.87	-0.05	0.91			0.35	0.28	1.42	0.13	0.31	0.56	-0.76	0.56		0.092364		-0.918863		-0.519374		0.491853
AT5G24290	Vacuolar iron transporter (VIT) family protein	protein_coding	MEMBRANE OF ER BODY 2 (MEB2)	MEMBRANE OF ER BODY 2 (MEB2)	MEB2					Solute transport.carrier-mediated transport.VIT family.metal cation transporter (MEB-type)		0.900808		0.153568		0.815919		0.152285													0.36	0.34	0.52	0.58	0.74	0.018	0.59	0.016								-0.13445
AT5G02500	encodes a member of heat shock protein 70 family.	protein_coding	HEAT SHOCK COGNATE PROTEIN 70-1 (HSC70-1)	HEAT SHOCK COGNATE PROTEIN 70-1 (HSC70-1);HEAT SHOCK PROTEIN 70-1 (HSP70-1); (AtHsp70-1);HEAT SHOCK COGNATE PROTEIN 70 (HSC70);ARABIDOPSIS THALIANA HEAT SHOCK COGNATE PROTEIN 70-1 (AT-HSC70-1)	HSC70-1				1.07668	External stimuli response.temperature.Hsp (heat-shock-responsive protein) families.Hsp70 family.DnaK protein	-1.1557	7.11141e-10		0.0545331		0.997084	-1.59246	1.16775e-18			-0.15	0.0056	0.02	0.11	0.11	0	-0.06	0.75			0.37	0.51	-1.99	0.83	-2.68	0.083	-0.32	0.25		-0.678072		-0.540568		0.10806		-0.0294438
AT3G29075	glycine-rich protein	protein_coding							1.48414	not assigned.annotated		0.420427		0.683026		0.659287		0.918929			-0.13	0.51	-0.67	0.083	-0.29	0.51	0.25	0.25			0.38	0.061	-0.05	0.3	0.1	0.36	0.53	0.00064		0.440573		-0.060121		-0.47032		0.0303736
AT1G72410	COP1-interacting protein-like protein	protein_coding							2.19122	not assigned.annotated		0.244009		0.291862		0.751889	-0.610791	0.000118249													0.39	0.83	0.97	0.083	0.01	0.83	-0.57	0.56		-0.554589		-0.510195		-0.29956		-0.343954
AT3G45090	P-loop containing nucleoside triphosphate hydrolases superfamily protein	protein_coding							0.818744	not assigned.annotated		0.964261	0.69581	0.000836941		0.592895	-0.497723	0.0077437													0.4	0.75	2.45	0.068	1.42	0.1	-0.64	0.12		0.180572		-0.549339		-0.267284		0.462627
AT1G66410	encodes a calmodulin	protein_coding	CALMODULIN 4 (CAM4)	CALMODULIN 4 (CAM4)	CAM4				1.32182	not assigned.annotated		0.630384		0.13976	0.773699	7.22165e-07	0.379283	0.0106817													0.4	0.45	0.57	0.39	0.12	0.37	-0.05	0.73		0.333657		-0.0222528		-0.681581		-0.32567
AT2G02070	RAVEN is part of the network regulated by BLJUEJAY, JACKDAW, SACRECROW and SHORT-ROOT to regulate root tissue patterning through cell lineage specification and asymmetric cell division. RAVEN is directly activated by SHORT-ROOT and directly repressed by JACKDAW.	protein_coding	INDETERMINATE(ID)-DOMAIN 5 (IDD5)	INDETERMINATE(ID)-DOMAIN 5 (IDD5);INDETERMINATE(ID)-DOMAIN 5 (AtIDD5);RAVEN (RVN)	ID					RNA biosynthesis.transcriptional activation.C2H2 zinc finger transcription factor		0.249306	-0.600371	0.0118723	-0.680659	0.00640686		0.0865006													0.4	0.15	-0.46	0.47	-0.25	0.86	0.61	0.92		0.45799		-0.0159415		-0.011588		0.462343
AT3G07300	NagB/RpiA/CoA transferase-like superfamily protein	protein_coding							2.25573	Protein biosynthesis.translation initiation.pre-initiation complex (PIC).eIF2B eIF2-GDP recycling complex.eIF2B-beta	-0.612931	0.0490103		0.267468		0.261303	-0.551759	0.0198856													0.41	0.25	1.62	0.015	0.63	0.74	-0.58	0.6		-0.448096		-0.77961		-0.537965		-0.206451
AT2G45140	Encodes a Plant VAMP-Associated protein that localizes to the ER and binds to the sitosterol-binding protein ORP3a. The WFDE motif in ORP3a appears to be important for this direct interaction. Mutation of this motif causes ORP3a to relocalize to the Golgi and cytosol. The interaction between PVA12 and ORP3a does not appear to be sterol-dependent. The mRNA is cell-to-cell mobile.	protein_coding	PLANT VAP HOMOLOG 12 (PVA12)	PLANT VAP HOMOLOG 12 (PVA12)	PVA12					not assigned.annotated		0.878285		0.772408		0.1841		0.0579315			0.09	0.75	0.96	0.018	0.84	0.018	-0.02	0.92			0.43	0.42	0.96	0.32	0.79	0.099	0.26	0.29		0.66172		0.0916305		-0.609463		-0.0393742
AT1G18210	Calcium-binding EF-hand family protein	protein_coding								not assigned.annotated		0.917938		0.0830907		0.827921		0.0985799			-0.25	0.083	-0.31	0.00025	-0.04	0.23	0.03	0.38			0.43	0.34	0.32	0.58	-0.36	1	-0.24	0.92		0.366617		-0.11379		-0.238724		0.241683
AT2G16640	multimeric translocon complex in the outer envelope membrane 132	protein_coding	MULTIMERIC TRANSLOCON COMPLEX IN THE OUTER ENVELOPE MEMBRANE 132 (TOC132)	ARSENATE INDUCED CHLOROSIS 1 (AIC1);MULTIMERIC TRANSLOCON COMPLEX IN THE OUTER ENVELOPE MEMBRANE 132 (TOC132);MULTIMERIC TRANSLOCON COMPLEX IN THE OUTER ENVELOPE MEMBRANE 132 (ATTOC132)	TOC132					Protein translocation.chloroplast.outer envelope TOC translocation system.Toc90/Toc120/Toc132/Toc159 component		0.579705	0.400943	0.0171169		0.319563	-0.319901	0.0415472			-0.14	0.47	0.31	0.00015	0.32	0.0049	-0.13	0.089			0.45	0.63	0.56	0.47	0.07	0.86	-0.04	0.6		0.0213737		-0.606658		-0.400962		0.227069
AT2G46020	Encodes a SWI/SNF chromatin remodeling ATPase that upregulates transcription of all three CUC genes and is involved in the formation and/or maintenance of boundary cells during embryogenesis. Also mediates repression of expression of seed storage proteins in vegetative tissues. Interacts strongly with AtSWI3C, also with AtSWI3B, but not with AtSWI3A or AtSWI3D.	protein_coding	BRAHMA (BRM)	CHROMATIN REMODELING 2 (CHR2); (CHA2);BRAHMA (BRM);ARABIDOPSIS THALIANA BRAHMA (ATBRM)	BRM					Chromatin organisation.chromatin remodeling complexes.ATPase core components.Snf2-like group.Snf2 chromatin remodeling factor		0.491697		0.326006		0.685308		0.151931			0.18	0.52	0.53	0.27	0.44	0.068	0.09	0.3			0.45	0.43	0.32	0.59	0.19	0.14	0.32	0.25		-0.152003		-0.68966		-0.206451		0.331206
AT3G56990	embryo sac development arrest 7	protein_coding	EMBRYO SAC DEVELOPMENT ARREST 7 (EDA7)	EMBRYO SAC DEVELOPMENT ARREST 7 (EDA7)	EDA7				1.77912	not assigned.not annotated	-1.59998	4.60533e-06		0.228871		0.146432	-1.38958	4.78095e-07	-1.77139												0.46	0.047	0.16	0.21	-0.14	0.87	0.16	0.49				-0.96408				0.249172
AT3G61690	Putative TNAase	protein_coding							1.77962	not assigned.not annotated		0.218573		0.957266		0.933046		0.105968													0.47	0.58	0.75	0.49	-0.76	0.6	-1.04	0.55		0.21864		-0.611435		-0.313499		0.516576
AT1G72040	Encodes a multisubstrate deoxyribonucleoside kinase that salvages DNA precursors.	protein_coding	DEOXYRIBONUCLEOSIDE KINASE (DNK)	(ATDNK);DEOXYRIBONUCLEOSIDE KINASE (DNK)	DNK				4.14401	Enzyme classification.EC_2 transferases.EC_2.7 transferase transferring phosphorus-containing group		0.218573		0.371315		0.710109	-0.482562	0.0361439													0.48	0.28	2.61	0.13	-22.02	0.083	-24.15	0.083		0.104337		-0.463947		-0.216811		0.351472
AT5G18760	RING/U-box superfamily protein	protein_coding							3.10698	Protein degradation.peptide tagging.Ubiquitin (UBQ)-anchor addition (ubiquitylation).UBQ-ligase E3 activities.RING-domain E3 ligase activities.RING-v-type E3 ligase	0.796213	0.0273332		0.568367		0.0927445		0.196843													0.49	0.034	-0.86	0.76	0.02	0.78	1.37	0.0056		0.430634		-0.201634		-0.112894		0.519374
AT2G43800	Localizes to plasmodesmata (PD) through its transmembrane domain and is required for normal intercellular trafficking. Functions in a partially redundant manner with its closest homolog AtFH1. Regulates PD's permeability by anchoring actin filaments to PD. Caps the barbed end of actin filaments and stabilizes them in vitro.	protein_coding	FORMIN 2 (FH2)	FORMIN 2 (FH2)	FH2					Cytoskeleton.microfilament network.actin polymerisation.formin actin filament elongation factor activities.group-I formin		0.813939		0.92146		0.755479		0.509145													0.49	0.28	0.31	0.51	0.35	0.56	0.53	0.56		0.365871		0.0439433		-0.0174171		0.304511
AT1G80750	Cytosolic ribosomal 60S subunit protein.	protein_coding	(RPL7A)	(RPL7A)	RPL7A	uL30a			1.48289	Protein biosynthesis.cytosolic ribosome.large subunit (LSU).LSU proteome component.RPL7 component	-1.84014	1.96119e-10		0.551497		0.103522	-1.45109	9.38338e-09	-1.28009												0.5	0.018	0.32	0.11	0.15	0.36	0.32	0.13		-0.197446		-0.392842		-0.40864		-0.213244
AT5G65910	BSD domain-containing protein	protein_coding								RNA biosynthesis.transcriptional activation.BSD transcription factor	0.885747	9.4498e-07		0.91333		0.568874	1.07428	1.87036e-12		0.947739	0.21	0.2	0.19	0.18	0.13	0.27	0.15	0.42			0.51	0.42	-0.82	0.86	-0.21	0.72	1.12	0.35		0.357552		-0.518873		-0.499571		0.376854
AT1G26300	BSD domain-containing protein	protein_coding								RNA biosynthesis.transcriptional activation.BSD transcription factor	1.12944	0.00153568		0.244198		0.722749		0.168853													0.51	0.021	0.15	0.24	-0.07	0.9	0.29	0.2						0.0725686		0.51069
AT1G52200	PLAC8 family protein	protein_coding							0.848127	not assigned.annotated		0.672837		0.540583		0.870499		0.0853691		1.90998											0.51	0.51	-4.43	0.56	2.2	0.51	7.14	1		0.425022		0.728928		-0.249172		-0.553078
AT2G47970	Nuclear pore localization protein NPL4	protein_coding								not assigned.annotated		0.433301		0.627696		0.0599849		0.0875783													0.52	0.45	-1.15	0.086	-0.53	0.36	1.14	0.028		-0.601451		-0.827163		0.771376		0.997088
AT1G20220	Alba DNA/RNA-binding protein	protein_coding							1.24528	RNA processing.ribonuclease activities.RNase P ribonuclease activities.RNA-dependent RNase P complex.RPP25/POP6 | RPP20/POP7 component	-0.584976	0.0215998		0.842887		0.144839	-0.934588	6.09078e-06	-1.12587		-0.04	0.42	0.29	0.19	0.27	0.016	-0.06	0.52			0.55	0.63	0.3	0.72	0.3	0.36	0.55	0.12		0.0630098		-0.347923		-0.0343144		0.376619
AT3G45190	SIT4 phosphatase-associated family protein	protein_coding								not assigned.not annotated		0.499593	0.323267	0.0494413		0.700953		0.694728			-0.07	0.56	0.06	0.39	0.13	0.048	0	0.82			0.57	0.64	0.98	0.58	0.39	0.52	-0.02	0.38		0.0671142		-0.827533		-0.474539		0.420108
AT4G05150	Octicosapeptide/Phox/Bem1p family protein	protein_coding								not assigned.not annotated		0.970802		0.054235		0.27839		0.638538	1.07644												0.58	0.49	-1.55	0.068	-0.35	0.37	1.78	0.1		0		0.286304		0.314873		0.0285692
AT2G25800	elongation factor Ts (DUF810)	protein_coding								not assigned.annotated		0.82677		0.845094		0.523825		0.46624													0.58	0.05	0.95	0.012	0.02	0.47	-0.35	0.23		-0.277534		-0.463947		0.0430687		0.229482
AT3G25250	Arabidopsis protein kinase The mRNA is cell-to-cell mobile.	protein_coding	AGC2 KINASE 1 (AGC2-1)	AGC2 KINASE 1 (AGC2-1); (AtOXI1);OXIDATIVE SIGNAL-INDUCIBLE1 (OXI1); (AGC2)	AGC2-1					Protein modification.phosphorylation.AGC kinase superfamily.AGC-VIII kinase	2.66083	0.000178551		0.355543		0.558232	2.27693	3.40777e-05		2.86864											0.59	0.53	-1.72	0.13	-2.52	0.9	-0.21	0.76
AT5G16150	Encodes a putative plastidic glucose transporter.	protein_coding	PLASTIDIC GLC TRANSLOCATOR (PGLCT)	PLASTIDIC GLC TRANSLOCATOR (PGLCT);GLUCOSE TRANSPORTER 1 (GLT1)	PGLCT					Solute transport.carrier-mediated transport.MFS superfamily.SP family.hexose transporter (SGB/GlcT-type)		0.181702		0.375639		0.148649		0.386982			0.33	0.0086	0.21	0.064	0.06	0.69	0.19	0.2			0.61	0.52	1.38	0.14	0.7	0.028	-0.07	0.75		0.0795673		-0.410088		-0.105833		0.383823
AT1G18190	This gene is predicted to encode a protein that functions as a Golgi apparatus structural component known as a golgin in mammals and yeast. A fluorescently-tagged version of GC2 co-localizes with Golgi markers, and this localization appears to be replicated using the C-terminal (508?668 aa) portion of the protein.	protein_coding	GOLGIN CANDIDATE 2 (GC2)	GOLGIN CANDIDATE 2 (GC2)	GC2				1.51028	Vesicle trafficking.target membrane tethering.Golgi membrane tethering factors.GC2-type golgin		0.460383		0.526396		0.680843		0.724404													0.62	0.23	0.55	0.39	0.23	0.31	0.29	0.25		-0.106915		-0.283793		-0.263034		-0.0861566
AT1G76850	Encodes a member of the exocyst complex gene family. The exocyst is a protein complex involved in tethering vesicles to the plasma membrane during regulated or polarized secretion. The mRNA is cell-to-cell mobile.	protein_coding	EXOCYST COMPLEX COMPONENT SEC5 (SEC5A)	EXOCYST COMPLEX COMPONENT SEC5 (SEC5A)	SEC5A				1.2337	Vesicle trafficking.target membrane tethering.Exocyst complex.SEC5 component		0.310469		0.690316		0.885073		0.725184													0.63	0.11	0.14	0.27	0.39	0.14	0.88	0.009		0.0132968		-0.432959		-0.244622		0.201634
AT3G02880	Leucine-rich repeat protein kinase family protein	protein_coding	KINASE 7 (KIN7)	KINASE 7 (KIN7)	KIN7				1.39191	Protein modification.phosphorylation.TKL kinase superfamily.LRR-III kinase		0.962308		0.62497		0.585424		0.873952			-0.06	0.66	0.06	0.45	0.09	0.45	-0.04	0.95			0.64	0.51	1.12	0.25	-0.17	0.51	-0.64	0.25		-0.0173821		-0.429508		-0.104227		0.307899
AT3G52380	Encodes a chloroplast RNA-binding protein that stabilizes chloroplast RNAs as evidenced by analyses of transcript accumulation in null mutants. Essential for seedling development (albino, strongly retarded growth even on sucrose-containing medium).	protein_coding	CHLOROPLAST RNA-BINDING PROTEIN 33 (CP33)	PIGMENT DEFECTIVE 322 (PDE322);CHLOROPLAST RNA-BINDING PROTEIN 33 (CP33)	CP33				2.04689	not assigned.annotated	-1.60648	2.72242e-28		0.91059		0.398718	-1.43727	4.23199e-31		-1.80441	-0.29	0.048	-0.05	0.051	0.07	0.7	-0.16	0.57			0.65	0.28	-23.46	0.05	-10.06	0.083	14.05	0.56		-0.146841		-0.721536		-0.507231		0.067463
AT2G27285	nuclear speckle splicing regulatory-like protein (DUF2040)	protein_coding								not assigned.not annotated	0.727429	0.0182378		0.130742		0.795019		0.183681													0.67	0.26	0.23	1	0.35	0.2	0.78	0.12		-0.438884		-0.886343		-0.503168		-0.0557094
AT5G63420	Encodes a member of the metallo-beta-lactamase protein family that plays a vital role in embryo morphogenesis and apical-basal pattern formation by regulating chloroplast development. In bacteria, RNase J plays an important role in rRNA maturation and in the 5&#8242; stability of mRNA.	protein_coding	EMBRYO DEFECTIVE 2746 (emb2746)	RIBONUCLEASE J (ATRNJ);EMBRYO DEFECTIVE 2746 (emb2746)	emb2746					RNA processing.organelle machineries.ribonuclease activities.RNase J endoribonuclease		0.39358	1.10631	0.000194617	0.766122	0.029568	-0.70833	0.0144418			0.04	0.28	0.09	0.38	0.02	0.06	-0.03	0.78			0.68	0.96	0.26	1	0.13	0.56	0.55	0.49		-0.0840643		-0.82103		-0.358454		0.378512
AT5G48240	Rrp15p protein	protein_coding							3.78501	not assigned.not annotated	-1.76883	8.10633e-06	0.710374	0.0376206	1.18192	0.00715228	-1.29729	3.15342e-06													0.71	0.07	0.81	0.026	-0.02	0.92	-0.13	0.52				-0.756074				-0.393821
AT2G25480	TPX2 (targeting protein for Xklp2) protein family	protein_coding								Cytoskeleton.microtubular network.microtubule dynamics.WDL microtubule-stabilizing factor		0.943686		0.75498		0.990581		0.600703													0.71	0.83	-0.74	0.83	0.6	1	2.06	0.25		0.0995357	-1.04182	-1.04182		-0.836501		0.304855
AT1G66680	unknown function	protein_coding	(AR401)	(AR401)	AR401					not assigned.not annotated		0.703062		0.14178		0.805187		0.626438			-0.13	0.46	-0.03	0.93	0.15	0.19	0.04	0.58			0.71	0.15	-0.52	0.87	-0.71	0.038	0.52	0.91		-0.311314		-0.689071		-0.0113748		0.366382
AT5G13530	Encodes KEEP ON GOING (KEG), a RING E3 ligase involved in abscisic acid signaling. KEG is essential for Arabidopsis growth and development. ABA promotes KEG degradation via the ubiquitin dependent 26S proteasome pathway.	protein_coding	KEEP ON GOING (KEG)	KEEP ON GOING (KEG)	KEG				5.56125	Phytohormones.abscisic acid.perception and signalling.signal transducer (KEG)		0.880296	0.488649	0.0219414		0.925265	-0.394111	0.0484972													0.72	0.56	2.24	0.099	2.15	0.0046	0.63	0.059		-0.0297473	-1.02975	-1.02975		-0.0614005		0.938599
AT5G06970	PATROL1 is a Munc13-like protein involved in mediating H[+]-ATPase translocation. It interacts with AHA1and is responsible for its translocation during stomatal movement.	protein_coding	PROTON ATPASE TRANSLOCATION CONTROL 1 (PATROL1)	PROTON ATPASE TRANSLOCATION CONTROL 1 (PATROL1)	PATROL1				1.55279	not assigned.annotated		0.313551		0.91479		0.677541		0.740583			0.17	0.63	0.08	0.72	0.03	0.47	0.13	0.75			0.72	0.025	1.04	0.011	0.4	0.1	0.09	0.92		0.136204		-0.549687		-0.499795		0.186096
AT1G70320	encodes a ubiquitin-protein ligase-like protein containing a HECT domain. There are six other HECT-domain UPLs in Arabidopsis.	protein_coding	UBIQUITIN-PROTEIN LIGASE 2 (UPL2)	UBIQUITIN-PROTEIN LIGASE 2 (UPL2)	UPL2					Protein degradation.peptide tagging.Ubiquitin (UBQ)-anchor addition (ubiquitylation).UBQ-ligase E3 activities.HECT E3 monomeric ligase		0.65121	0.517748	0.00379952		0.77849	-0.724153	6.15012e-06			-0.05	0.87	0.26	0.0014	0.29	0.0043	-0.02	0.76			0.73	0.05	0.97	0.05	-0.56	0.083	-0.79	0.083		-0.192645	-1.24511	-1.24511		-0.13493		0.917538
AT1G73980	TTM1 is a triphosphate tunnel metalloenzyme that displays pyrophosphatase activity. It contains both a uridine kinase (UK) domain,CYTH domain, a coiled-coil domain and a transmembrane domain at the C-terminal Mutants show a delay in leaf senescence. Can functionally complement TTM1 and vise versa. (PMID:28733390)	protein_coding	TRIPHOSPHATE TUNNEL METALLOENZYME 1 (TTM1)	(ATTTM1);TRIPHOSPHATE TUNNEL METALLOENZYME 1 (TTM1)	TTM1				1.58689	not assigned.annotated	0.74561	0.00699218		0.966121		0.613595	0.914401	2.43099e-05		1.03592											0.74	0.83	-11.08	0.56	0.82	0.05	12.64	0.083		0.296718		-0.302184		-0.402759		0.196143
AT1G78610	mechanosensitive channel of small conductance-like 6	protein_coding	MECHANOSENSITIVE CHANNEL OF SMALL CONDUCTANCE-LIKE 6 (MSL6)	MECHANOSENSITIVE CHANNEL OF SMALL CONDUCTANCE-LIKE 6 (MSL6)	MSL6				1.19697	Solute transport.channels.MSL mechanosensitive ion channel		0.837175		0.368956		0.760008		0.40298													0.75	0.14	1.08	0.093	0.54	0.23	0.21	0.48		-0.253757		-0.931828		-0.405819		0.272253
AT5G63480	mediator of RNA polymerase II transcription subunit	protein_coding								RNA biosynthesis.RNA polymerase II-dependent transcription.MEDIATOR transcription co-activator complex.head module.MED30 component		0.728976		0.525978		NA		0.913115													0.77	0.42	0.68	0.72	0.56	0.14	0.65	0.028		0.983512		0.825971		-0.139163		0.0183785
AT5G64813	The LIP1 gene encodes a small GTPase that influences the light input pathway of the plant circadian network. An MBP:LIP1 fusion protein has GTP hydrolyzing abilities in vitro. In plants, LIP1 seems to play a negative role in regulating circadian period that can be suppressed by light. LIP1 also seems to negatively affect light-pulse-dependent resetting of the clock, especially during the first po…	protein_coding	LIGHT INSENSITIVE PERIOD1 (LIP1)	LIGHT INSENSITIVE PERIOD1 (LIP1)	LIP1				1.37457	not assigned.annotated		0.765461		0.343321		0.818664		0.322542													0.77	0.87	2.37	0.58	2.4	0.36	0.81	0.75		-0.200697		-0.459432		-0.147226		0.111508
AT5G64200	encodes an SC35-like splicing factor of 35 kD localized to the nuclear specks.	protein_coding	ORTHOLOG OF HUMAN SPLICING FACTOR SC35 (SC35)	ARABIDOPSIS THALIANA ORTHOLOG OF HUMAN SPLICING FACTOR SC35 (ATSC35);ORTHOLOG OF HUMAN SPLICING FACTOR SC35 (At-SC35);ORTHOLOG OF HUMAN SPLICING FACTOR SC35 (SC35)	SC35				2.15001	not assigned.annotated		0.655096		0.436939	-0.621507	0.0126942		0.409833													0.77	0.047	0.83	0.013	0.11	0.77	0.05	0.49		0.227177		-0.203872		0.200387		0.631437
AT5G62190	DEAD/DEAH box RNA helicase PRH75	protein_coding	(PRH75)	(ATRH7); (PRH75)	PRH75					not assigned.annotated	-0.498966	0.0255337		0.108455		0.183414	-1.21458	9.86179e-12			0.09	0.62	0.28	0.11	0.16	0.15	-0.04	0.71			0.79	0.26	1.26	0.14	0.28	0.36	-0.19	0.92	-1.67807	-1.67807		-0.439285		0.748461		-0.490326
AT1G69070	nucleolar-like protein	protein_coding							1.14473	Protein biosynthesis.cytosolic ribosome.small subunit (SSU).SSU processome.UTP2/NOP14 assembly factor	-1.2793	8.57901e-05	0.686414	0.0337318		0.180863	-1.40723	1.35217e-07	-1.49147												0.79	0.23	0.43	0.52	-1.39	0.29	-1.03	0.83		-0.168506		-0.922595		-0.212849		0.541241
AT3G08510	Phosphoinositide-specific phospholipase C (PI-PLC), catalyzes hydrolysis of phosphatidylinositol 4,5-bisphosphate into inositol 1,4,5-trisphosphate and diacylglycerol. It is involved in auxin biosynthesis and signaling, modulating development of both male and female gametophytes. It also regulates MAMP-triggered immunity by modulating ROS production.	protein_coding	PHOSPHOLIPASE C 2 (PLC2)	PHOSPHOLIPASE C 2 (PLC2);PHOSPHOLIPASE C 2 (ATPLC2)	PLC2				1.06506	Lipid metabolism.lipid degradation.phospholipase activities.phospholipase C activities.PI-PLC-type phospholipase C		0.526202		0.562949		0.850627		0.219849													0.8	0.87	0.66	0.86	-0.99	0.36	-0.84	0.35		-0.0948592		-0.533432		-0.38272		0.0558532
AT5G52200	Encodes an inhibitor of protein phosphatase one (PP1).	protein_coding	INHIBITOR-2 (I-2)	(AtI-2);INHIBITOR-2 (I-2)	I-2				0.642536	not assigned.annotated		0.723145		0.963052		0.174067		0.264639													0.81	0.81	-5.65	0.42	0.18	0.67	6.64	0.14		0.539448		-0.160992	-1.00618	-1.00618		-0.305739
AT4G37100	Pyridoxal phosphate (PLP)-dependent transferases superfamily protein	protein_coding								not assigned.not annotated		0.757648		0.788162		0.48647	-0.48007	0.0402417													0.81	0.2	0.61	0.2	0.79	0.72	0.98	0.6		-0.118644	-1	-1		-0.198546		0.68281
AT2G31800	Integrin-linked protein kinase family	protein_coding								Protein modification.phosphorylation.TKL kinase superfamily.MAP3K-RAF kinase	0.629691	0.00582691		0.056812	-0.491696	0.0364201	0.605036	0.00290645	1.29287	0.833405											0.82	0.57	-0.36	0.92	-2.09	0.19	-0.9	0.42		-0.307182		-0.697971		0.0831412		0.473931
AT5G25270	Ubiquitin-like superfamily protein	protein_coding							4.05633	not assigned.not annotated		0.529793		0.900385		0.811656		0.299599													0.83	0.75	-1.12	0.068	0.74	0.068	2.69	0.009		0.111645		-0.214125		0.0527415		0.378512
AT1G21660	Chaperone DnaJ-domain superfamily protein	protein_coding	AUXILIN-LIKE3 (AUXILIN-LIKE3)	AUXILIN-LIKE3 (AUXILIN-LIKE3)	AUXILIN-LIKE3					Vesicle trafficking.clathrin coated vesicle (CCV) machinery.CCV accessory factors.AUL clathrin uncoating protein		0.465182		0.634004		0.772266		0.263227													0.94	0.025	1.48	0.0062	-0.03	0.93	-0.57	0.35		-0.284729		-0.574236		-0.363507		-0.0740006
AT4G03120	C2H2 and C2HC zinc fingers superfamily protein	protein_coding								RNA processing.RNA splicing.U2-type-intron-specific major spliceosome.U1 small nuclear ribonucleoprotein particle (snRNP).U1C snRNP component		0.465853		0.654882		0.383197		0.112919													0.94	0.13	0.67	0.56	0.05	0.83	0.32	0.56	-1.43296	-1.43296		-0.777608	1.32193	1.32193		0.666576
AT1G43900	Protein phosphatase 2C family protein	protein_coding								not assigned.annotated		0.471035		0.476206		0.81071	0.622835	0.00750481													0.95	0.34	-2.58	0.58	-1.53	0.32	2	0.46		-0.667425		0.230006		0.210218		-0.687213
AT3G06010	Encodes AtCHR12, a SNF2/Brahma-type chromatin-remodeling protein. AtCHR12 mediates temporary growth arrest in Arabidopsis upon perceiving environmental stress.	protein_coding	(ATCHR12)	CHROMATIN REMODELING 12 (CHR12); (ATCHR12)	ATCHR12				2.63587	Chromatin organisation.chromatin remodeling complexes.ATPase core components.Snf2-like group.Snf2 chromatin remodeling factor		0.761192		0.669062		0.943223		0.989516													0.95	0.037	0.37	0.27	0.16	0.47	0.75	0.047		-0.186878		-0.612184		-0.404842		0.0204641
AT4G35100	a member of the plasma membrane intrinsic protein PIP. functions as aquaporin. Salt-stress-inducible MIP	protein_coding	PLASMA MEMBRANE INTRINSIC PROTEIN 3 (PIP3)	PLASMA MEMBRANE INTRINSIC PROTEIN 3 (PIP3); (SIMIP);PLASMA MEMBRANE INTRINSIC PROTEIN 2;7 (PIP2;7);PLASMA MEMBRANE INTRINSIC PROTEIN 3A (PIP3A)	PIP3				0.845612	Solute transport.channels.MIP family.plasma membrane intrinsic protein (PIP-type)		0.19738	-0.562601	0.00457611	-0.591632	0.00333041		0.223715			0.35	0.06	0.88	0	0.48	0	-0.05	0.88			1.01	0.11	0.7	0.2	-0.05	0.27	0.26	0.12		0.266174		0.0280144		-0.0600376		0.178122
AT5G54430	Contains a universal stress protein domain. Protein is phosphorylated in response to Phytophthora infestans zoospores and xylanase.	protein_coding	(PHOS32)	(PHOS32); (ATPHOS32)	PHOS32					not assigned.annotated		0.722498		0.765952		0.540597		0.373879			-0.03	0.3	0.2	0.12	0.01	0.32	-0.22	0.039			1.01	0.05	1.48	0.05	-0.83	0.083	-1.3	0.083		0.405992		-0.168123		-0.696702		-0.122587
AT5G53470	Encodes an acyl-CoA binding protein that is localized to vesicles,and plasma membrane especially in epidermal cells of heart, torpedo and cotyledon stage embryos, cell wall of the seed coat. Northern blot analysis showed that the 1.4 kb ACBP1 mRNA was expressed in silique, root, stem, leaf and flower.	protein_coding	ACYL-COA BINDING PROTEIN 1 (ACBP1)	ACYL-COA BINDING PROTEIN 1 (ACBP1); (ATACBP1);ACYL-COA BINDING PROTEIN (ACBP)	ACBP1				1.18065	not assigned.annotated		0.296533		0.854717		0.710109		0.321813													1.02	0.019	1.23	0.061	0.83	0.12	0.61	0.049		-0.628031	-1.24616	-1.24616		-0.107756		0.510373
AT5G20650	Encodes COPT5, a member of copper transporter family and functionally complements a high affinity copper transporter mutant in yeast. Plays an important role in the plant response to environmental copper scarcity, probably by remobilizing copper from prevacuolar vesicles, which could act as internal stores or recycling vesicles to provide the metal cofactor to key copper-dependent processes such …	protein_coding	COPPER TRANSPORTER 5 (COPT5)	(ATCOPT5);COPPER TRANSPORTER 5 (COPT5)	COPT5					Nutrient uptake.copper uptake.reduction-based uptake.COPT Cu(+) transporter		0.305858		0.878338		0.771459		0.312667													1.04	0.63	0.6	0.58	0.96	0.045	1.4	0.016		0.143735		0.671617		0.621799		0.0939179
AT5G01530	light harvesting complex photosystem II	protein_coding	LIGHT HARVESTING COMPLEX PHOTOSYSTEM II (LHCB4.1)	LIGHT HARVESTING COMPLEX PHOTOSYSTEM II (LHCB4.1)	LHCB4.1				1.48556	Photosynthesis.photophosphorylation.photosystem II.LHC-II complex.LHCb4-type component		0.784824	-0.988635	9.53951e-05	-1.1905	1.77402e-06		0.822922			0.15	0.034	0.04	0.2	0.02	0.43	0.12	0.063			1.07	0.26	-1.56	0.86	-1.63	0.2	1	0.53		0.12883		0.220126		0.845175		0.753879
AT1G70180	Sterile alpha motif (SAM) domain-containing protein	protein_coding							1.24024	not assigned.not annotated		0.688938		0.555166		0.220122		0.18483													1.18	0.42	-0.48	0.27	-0.14	0.47	1.53	0.009		-0.547488		-0.0981804		0.408085		-0.0412227
AT5G49760	Leucine rich receptor kinase.	protein_coding							1.33696	Protein modification.phosphorylation.TKL kinase superfamily.LRR-VIII kinase families.LRR-VIII-1 kinase		0.916372		0.981372		0.49997		0.319819													1.2	0.037	1.34	0.27	0.13	0.86	-0.02	0.92		-0.189034		-0.475338		0.0071955		0.2935
AT2G46270	encodes a bZIP G-box binding protein whose expression is induced by ABA. It has been shown to bind to Adh that contains the G-box and is induced by cold and water deprivation. GBF3 has been shown to be expressed mostly in the root and dark-grown leaves. GBF3 can act as homodimers and as heterodimers with GFB1, GBF2 and GBF4. In addition, GBF3!?s DNA binding activity is enhanced by GIP1, GPRI1 and…	protein_coding	G-BOX BINDING FACTOR 3 (GBF3)	G-BOX BINDING FACTOR 3 (GBF3)	GBF3					RNA biosynthesis.transcriptional activation.bZIP superfamily.bZIP transcription factor		0.13702		0.843887		0.954317	0.556609	0.0325473	1.20396												1.21	0.28	0.9	1	-0.11	0.83	0.2	0.56		0.0655883		-0.472068		-0.646363		-0.108706
AT1G15940	One of 5 PO76/PDS5 cohesion cofactor orthologs of Arabidopsis.	protein_coding	(PDS5E)	(ATPDS5E); (PDS5E)	PDS5E				1.773	Cell cycle.mitosis and meiosis.sister chromatid separation.cohesin establishment.PDS5 cohesin cofactor		0.433073		0.351228		0.849715		0.75066			0.36	0.065	0.72	0.00022	0.44	0.0056	0.08	0.33			1.26	0.23	1.1	0.099	1.1	0.0051	1.26	0.082		-0.298081		-0.906891		0.0692627		0.678072
AT1G65030	This gene is predicted to encode a protein with a DWD motif. It can bind to DDB1a in Y2H assays, and DDB1b in co-IP assays, and may be involved in the formation of a CUL4-based E3 ubiquitin ligase	protein_coding								not assigned.not annotated	-1.534	0.00958247		0.380692		0.2465	-1.17643	0.0025513													1.27	0.13	1.58	0.25	-0.67	0.13	-0.98	0.083								-0.71249
AT2G19385	zinc ion binding protein	protein_coding								not assigned.annotated	-2.17435	1.32286e-05		0.718342	1.19541	0.0444535	-1.18992	0.00105389	-1.89324												1.31	0.078	0.93	0.39	-0.11	0.75	0.27	0.46				-0.096676				-0.363591
AT4G39850	Encodes a peroxisomal protein of the ATP binding cassette (ABC) transporter class (PMP subfamily) with significant identity to the human X-linked adrenoleukodystrophy protein (ALDP). The gene product promotes germination and represses embryo dormancy. ABI3, ABA1, FUS3 and LEC1 are epistatic to this gene. Mutants accumulate fatty acyl CoA suggesting a defect in uptake of fatty acyl CoA into the pe…	protein_coding	ATP-BINDING CASSETTE D1 (ABCD1)	PEROXISOMAL ABC TRANSPORTER 1 (PXA1);PEROXISOME DEFECTIVE 3 (PED3);COMATOSE (CTS);ACETATE NON-UTILIZING 2 (ACN2);ARABIDOPSIS THALIANA ATP-BINDING CASSETTE D1 (AtABCD1);ATP-BINDING CASSETTE D1 (ABCD1)	ABCD1					Solute transport.primary active transport.ABC superfamily.ABC1 family.subfamily ABCD transporter		0.332175	0.592279	0.00646781		0.360481		0.842221			-0.92	0.87	1.29	0.011	2.24	0.14	0.03	0.75			1.32	0.26	1.92	0.068	0.51	0.27	-0.1	0.17		-0.106915		-0.966053		-0.331206		0.527932
AT3G01060	lysine-tRNA ligase	protein_coding								not assigned.not annotated		0.801944	-0.711609	0.00166143	-0.658997	0.00516398		0.630295													1.37	0.15	-0.16	0.47	-0.31	0.58	1.22	0.028		-0.145198		0.131912		0.0984037		-0.178706
AT3G60240	protein synthesis initiation factor 4G (EIF4G). A mutation in this gene (cum2-1) results in decreased accumulation of CMV coat protein in upper, uninoculated leaves. Likely affects cell-to-cell movement of the virus, also affects TCV multiplication.	protein_coding	EUKARYOTIC TRANSLATION INITIATION FACTOR 4G (EIF4G)	CUCUMOVIRUS MULTIPLICATION 2 (CUM2);EUKARYOTIC TRANSLATION INITIATION FACTOR 4G (EIF4G)	EIF4G					Protein biosynthesis.translation initiation.mRNA loading.eIF4F mRNA unwinding complex.eIF4G component		0.991813		0.678282		0.0992231	-0.337893	0.00873487			0.05	0.74	0.22	0.0047	0.12	0.14	-0.05	0.2			1.44	0.044	-1.7	0.77	0.86	0.5	4.01	0.026		0.108253		-0.712198		-0.098915		0.721536
AT3G21430	DNA binding protein	protein_coding	ALWAYS EARLY 3 (ALY3)	ALWAYS EARLY 3 (ALY3);ARABIDOPSIS THALIANA ALWAYS EARLY 3 (ATALY3)	ALY3					RNA biosynthesis.transcriptional activation.MYB superfamily.MYB-related transcription factor		0.90825		0.54578		0.698122		0.987406													1.56	0.75	2.98	0.068	0.85	0.36	-0.56	0.75		-0.16711		-0.642448		-0.189034		0.286304
AT4G14920	Acyl-CoA N-acyltransferase with RING/FYVE/PHD-type zinc finger protein	protein_coding								RNA biosynthesis.transcriptional activation.PHD finger transcription factor		0.81985		0.726359		0.514142	-0.404042	0.0496665													1.62	0.34	-0.39	0.72	21.65	0.2	23.66	0.35		-0.192645		-0.630766		-0.017278		0.420843
AT3G16640	Encodes a protein homologous to translationally controlled tumor protein (TCTP) from Drosophila. In flies, TCTP functions guanine nucleotide exchange factor in the TOR signaling pathway. TCTP is expressed throughout the plant with highest levels seen in meristematic regions of the shoot and root. Loss of function alleles are not transmitted through the male gametophyte due to defects in pollen tu…	protein_coding	TRANSLATIONALLY CONTROLLED TUMOR PROTEIN (TCTP1)	(AtTCTP1);TRANSLATIONALLY CONTROLLED TUMOR PROTEIN (TCTP1)	TCTP1				3.17437	not assigned.annotated		0.442765	-1.55795	1.09459e-14	-1.53333	4.43133e-14		0.470084			-0.14	0.13	0.06	0.075	0.13	0.0011	-0.07	0.31			1.8	0.28	-5.67	0.56	1.17	0.51	8.64	1	-2.18903	-2.18903	1.10375	1.10375	2.65535	2.65535		-0.63743
AT4G28300	Encodes a protein with 13.6% proline amino acids that is predicted to localize to the cell wall. The mRNA is cell-to-cell mobile.	protein_coding							2.09032	not assigned.not annotated		0.934389	-0.982321	1.76513e-05	-1.08747	2.05532e-06		0.848547	1.46981	0.124276											1.81	0.0086	-9.61	0.0015	-0.18	0.91	11.25	0		0.517218		0.624133		0.6717		0.564785
AT3G21090	ABC-2 type transporter family protein	protein_coding	ATP-BINDING CASSETTE G15 (ABCG15)	ATP-BINDING CASSETTE G15 (ABCG15)	ABCG15					Solute transport.primary active transport.ABC superfamily.ABC2 family.subfamily ABCG transporter		0.568482		0.0505868		0.54636		0.788721	1.69356												1.93	0.87	1.12	0.86	1.15	0.14	1.96	0.047		-0.103505		-0.893085		0.189661		0.979241
AT5G15270	RNA-binding KH domain-containing protein	protein_coding							0.967682	not assigned.annotated		0.553204		0.89384		0.612517		0.936482													2.25	0.0039	2.43	0.045	0.53	0.1	0.35	0.12		-0.446683	-1.06103	-1.06103		0.0792267		0.693573
AT2G45430	Encodes a nuclear localized AT hook domain containing protein that can bind AT rich DNA in vitro. Overexpression of the gene results in delayed flowering. Is likely to act redundantly with AHL18, AHL27 and AHL29 in the regulation of flowering. It is also involved in both photo- and skotomorphogenesis.	protein_coding	AT-HOOK MOTIF NUCLEAR-LOCALIZED PROTEIN 22 (AHL22)	AT-HOOK MOTIF NUCLEAR-LOCALIZED PROTEIN 22 (AHL22)	AHL22					not assigned.annotated		0.802544		0.110531		0.993438	-0.628214	0.0161255													2.28	0.15	4.01	0.018	1.85	0.011	0.13	0.6		-0.147226		-0.422233		-0.117963		0.157044
AT1G73450	Protein kinase superfamily protein	protein_coding	PLANT-SPECIFIC DUAL-SPECIFICITY TYROSINE PHOSPHORYLATION-REGULATED KINASE 2B (DYRKP-2B)	PLANT-SPECIFIC DUAL-SPECIFICITY TYROSINE PHOSPHORYLATION-REGULATED KINASE 2B (DYRKP-2B)	DYRKP-2B					Protein modification.phosphorylation.CMGC kinase superfamily.DYRK kinase		0.604888		0.3518		0.667203		0.802509													2.37	0.11	1.07	0.36	0.25	0.93	1.55	0.076
AT1G63850	BTB/POZ domain-containing protein	protein_coding							1.12344	not assigned.annotated		0.695892		0.690737		0.646271	-0.495688	0.0417304													2.7	0.45	1.31	0.85	-1.99	0.71	-0.61	0.91		-0.123382		-0.286881		0		0.163499
AT2G37050	Leucine-rich repeat protein kinase family protein	protein_coding								Protein modification.phosphorylation.TKL kinase superfamily.LRR-I kinase		0.732764		0.968506		0.947669		0.718114													3.08	0.05	0.95	0.28	0.48	0.25	2.6	0.25		-0.189034		-0.83289		-0.494109		0.149747
AT4G01150	CURVATURE THYLAKOID 1A-like protein	protein_coding	CURVATURE THYLAKOID 1A (CURT1A)	CURVATURE THYLAKOID 1A (CURT1A)	CURT1A					not assigned.annotated		0.471035	-0.421326	0.0453345		0.451481	0.405761	0.0420121			0.34	0.0032	0.29	0.01	0.1	0.15	0.15	0.039			3.17	0.016	1.91	0.12	-0.94	0.028	0.32	0.46		0.197146		0.31366		-0.0737641		-0.190278
AT3G28050	nodulin MtN21-like transporter family protein	protein_coding	USUALLY MULTIPLE ACIDS MOVE IN AND OUT TRANSPORTERS 41 (UMAMIT41)	USUALLY MULTIPLE ACIDS MOVE IN AND OUT TRANSPORTERS 41 (UMAMIT41)	UMAMIT41					Solute transport.carrier-mediated transport.DMT superfamily.UmamiT-type solute transporter		0.121799		0.800716		0.995958	0.498815	0.0160045													20.86	0.28	15.29	0.25	2.39	0.28	7.96	1		-0.053242		-0.0861566		0.0584597		0.0913744
AT5G11070	hypothetical protein	protein_coding							4.61257	not assigned.not annotated		0.199992	-0.96462	0.00108909	-0.636053	0.0432317	0.774845	0.00536142	1.90399												21.31	0.13	14.45	0.25	-21.71	0.13	-14.85	0.25		0.235449		0.19592		-0.0366687		0.00285965
AT5G20190	Tetratricopeptide repeat (TPR)-like superfamily protein	protein_coding							0.622788	not assigned.not annotated		0.902113		0.55455		0.0572391		0.137643		0.582584											21.37	0.13	-1.81	0.56	-24.19	0.05	-1	0.083		-0.0100537		-0.540568		-0.289507		0.241008
ATMG01380	Mitochondrial 5S ribosomal RNA, which is a component of the 50S large subunit of mitochondrial ribosome.	ribosomal_rna	RIBOSOMAL RNA5S (RRN5)	RIBOSOMAL RNA5S (RRN5)	RRN5						-5.08038	0.000106837	-6.37298	8.34895e-07		0.0566738		0.294783
ATCG00970	chloroplast-encoded 5S ribosomal RNA	ribosomal_rna	RIBOSOMAL RNA5S (RRN5S)	RIBOSOMAL RNA5S (RRN5S)	RRN5S						-3.57192	0.00057055	-4.12484	1.36428e-05		NA		0.48812
AT2G04050	MATE efflux family protein	protein_coding								Solute transport.carrier-mediated transport.MOP superfamily.MATE family.metabolite transporter (DTX-type)	-3.39385	0.000192873		0.602317		0.436349		0.064415	-1.84676																							-0.704993				0.611075
ATCG01160	Chloroplast-encoded 5S ribosomal RNA, which is a component of the 50S large subunit of the plastidic ribosome.	ribosomal_rna	RIBOSOMAL RNA5S (RRN5S)	RIBOSOMAL RNA5S (RRN5S)	RRN5S						-3.0357	0.000651983	-3.55312	1.12429e-05		NA	-2.69857	0.0351992
AT2G27840	Belongs to the plant specific HD2 type proteins; similar to nucleolar Zea mays histone deacetylase; HD2-p39	protein_coding	(HDT4)	(HDT4);HISTONE DEACETYLASE 2D (HD2D); (HDT04);HISTONE DEACETYLASE 13 (HDA13)	HDT4					Chromatin organisation.histone modifications.histone deacetylation.HD2 histone deacetylase	-2.98111	2.44463e-11	0.998998	0.00457094	1.95708	7.19151e-05	-2.02303	1.89926e-11	-2.7309																							-0.735103				-0.33361
AT3G19440	Pseudouridine synthase family protein	protein_coding								RNA processing.RNA modification.pseudouridylation.RluA-type RNA pseudouridine synthase	-2.73977	0.00296541		0.235366	2.34439	0.0165717	-1.09831	0.0172969	-2.22624
AT2G32220	Ribosomal L27e protein family	protein_coding				eL27a				Protein biosynthesis.cytosolic ribosome.large subunit (LSU).LSU proteome component.RPL27 component	-2.73281	0.000519725		0.765527		0.0568864	-1.23421	0.0176155	-2.59062	-1.4006																						-0.493434				-0.926937
AT3G62950	Encodes a member of the CC-type glutaredoxin (ROXY) family that has been shown to interact with the transcription factor TGA2 and suppress ORA59 promoter activity.	protein_coding	(GRXC11)	(ROXY4); (GRXC11)	GRXC11				1.2952	Protein modification.S-glutathionylation and deglutathionylation.glutaredoxin		0.819956	-2.82278	0.00944926		NA	2.11246	0.0491336	5.80079
AT1G76410	RING/U-box superfamily protein	protein_coding	(ATL8)	(ATL8)	ATL8				2.55271	Protein degradation.peptide tagging.Ubiquitin (UBQ)-anchor addition (ubiquitylation).UBQ-ligase E3 activities.RING-domain E3 ligase activities.RING-H2-type E3 ligase		0.95688	-2.56347	0.00271754		NA		0.427211	3.54697	0.475137
AT5G54585	hypothetical protein	protein_coding							1.69609	not assigned.not annotated		0.265	-2.35792	0.000407708	-1.36098	0.0221046	1.77321	0.00613759																						0.345775				0.465867
AT1G10070	Encodes a chloroplast branched-chain amino acid aminotransferase. Complements the yeast leu/iso-leu/val auxotrophy mutant. Involved in cell wall development.	protein_coding	BRANCHED-CHAIN AMINO ACID TRANSAMINASE 2 (BCAT-2)	BRANCHED-CHAIN AMINO ACID TRANSFERASE 2 (BCAT2);BRANCHED-CHAIN AMINO ACID TRANSAMINASE 2 (BCAT-2);BRANCHED-CHAIN AMINO ACID TRANSAMINASE 2 (ATBCAT-2)	BCAT-2				3.86139	Amino acid metabolism.degradation.branched-chain amino acid.BCAT branched-chain aminotransferase		0.569488	-2.32791	1.18113e-06	-1.55833	0.00214588		0.582511	6.57627	4.14115																				-0.230298
AT4G40090	arabinogalactan protein 3	protein_coding	ARABINOGALACTAN PROTEIN 3 (AGP3)	ARABINOGALACTAN PROTEIN 3 (AGP3)	AGP3					not assigned.not annotated	-2.55807	0.00104153		0.555852		0.827921	-1.77245	0.00207094																							1.09295	1.09295
AT5G46780	VQ motif-containing protein	protein_coding							2.71996	not assigned.not annotated		0.600317	-2.10447	5.43315e-06		0.153669		0.0569932	1.02379	0.102661
AT1G62510	Bifunctional inhibitor/lipid-transfer protein/seed storage 2S albumin superfamily protein	protein_coding							1.03872	not assigned.not annotated		0.195638	-1.95561	1.00735e-08	-1.47012	2.50107e-06	0.99676	0.0051857		2.07046																				0.592774	1.40679	1.40679	1.06772	1.06772		0.253699
AT4G28040	nodulin MtN21-like transporter family protein	protein_coding	USUALLY MULTIPLE ACIDS MOVE IN AND OUT TRANSPORTERS 33 (UMAMIT33)	USUALLY MULTIPLE ACIDS MOVE IN AND OUT TRANSPORTERS 33 (UMAMIT33)	UMAMIT33				0.897165	Solute transport.carrier-mediated transport.DMT superfamily.UmamiT-type solute transporter		0.857102	-1.95067	1.52526e-07	-1.38087	0.000206432		0.114217	4.37582	3.62118																				0.302563		0.600904		-0.209453		-0.507795
AT3G47340	encodes a glutamine-dependent asparagine synthetase, the predicted ASN1 peptide contains a purF-type glutamine-binding domain, and is expressed predominantly in shoot tissues, where light has a negative effect on its mRNA accumulation. Expression is induced within 3 hours of dark treatment, in senescing leaves and treatment with exogenous photosynthesis inhibitor. Induction of gene expression was…	protein_coding	GLUTAMINE-DEPENDENT ASPARAGINE SYNTHASE 1 (ASN1)	GLUTAMINE-DEPENDENT ASPARAGINE SYNTHASE 1 (ASN1);ARABIDOPSIS THALIANA GLUTAMINE-DEPENDENT ASPARAGINE SYNTHASE 1 (AT-ASN1);DARK INDUCIBLE 6 (DIN6)	ASN1				0.451485	Amino acid metabolism.biosynthesis.aspartate family.asparagine.glutamine-dependent asparagine synthetase		0.884673	-1.94096	1.05268e-05	-2.02594	4.72557e-06		0.967996	5.69943	3.74415																				-0.309684		-0.613942		0.144874		0.449131
AT3G22060	contains Pfam profile: PF01657 Domain of unknown function that is usually associated with protein kinase domain Pfam:PF00069, however this protein does not have the protein kinase domain	protein_coding							0.125	not assigned.annotated	1.00242	1.41868e-07	-1.85034	4.51476e-20	-1.51845	2.50795e-17	1.33432	1.37088e-11		1.94794																				0.375367		0.111283		0.048997		0.313081
AT3G15450	aluminum induced protein with YGL and LRDR motifs	protein_coding							0.820355	not assigned.annotated		0.656131	-1.76872	5.93258e-05	-1.32026	0.00560384		0.133016	2.87852	3.01202																				0.255655		-0.09901		-0.469485		-0.11482
AT5G49450	Encodes a transcription activator is a positive regulator of plant tolerance to salt, osmotic and drought stresses.	protein_coding	BASIC LEUCINE-ZIPPER 1 (bZIP1)	BASIC LEUCINE-ZIPPER 1 (bZIP1);BASIC LEUCINE-ZIPPER 1 (AtbZIP1)	bZIP1				2.65471	RNA biosynthesis.transcriptional activation.bZIP superfamily.bZIP transcription factor		0.95688	-1.73423	1.35331e-09	-1.21106	3.47924e-05		0.0958573																						0.466176		0.400087		0.128668		0.194757
AT3G06750	hydroxyproline-rich glycoprotein family protein	protein_coding							5.98597	not assigned.not annotated		0.59426	-1.73222	5.92942e-07	-1.69787	7.30195e-07		0.518775	1.28418																					0.687213	1.20747	1.20747		0.717857		0.1976
AT3G01600	NAC domain containing protein 44	protein_coding	NAC DOMAIN CONTAINING PROTEIN 44 (NAC044)	NAC DOMAIN CONTAINING PROTEIN 44 (NAC044);NAC DOMAIN CONTAINING PROTEIN 44 (anac044)	NAC044					RNA biosynthesis.transcriptional activation.NAC transcription factor	-2.2154	0.0135193		0.945458		0.384377		0.0873295
AT5G49080	transposable_element_gene: similar to proline-rich extensin-like family protein [Arabidopsis thaliana] (TAIR:AT5G06640.1);(source:TAIR10)	transposable_element_gene	EXTENSIN 11 (EXT11)	EXTENSIN 11 (EXT11)	EXT11						-2.20684	0.0297042		0.868928		NA	-2.9455	0.000211194	-1.5
AT4G11350	transferring glycosyl group transferase (DUF604)	protein_coding								not assigned.not annotated	-2.20298	0.0415348		0.610551		NA		0.935265
AT4G37220	Cold acclimation protein WCOR413 family	protein_coding							0.626807	not assigned.annotated		0.410706	-1.72694	0.000458384	-1.44914	0.00208525		0.149996	4.78606																					0.781531		-0.0382193		-0.650902		0.168849
AT4G27652	hypothetical protein	protein_coding							1.22455	not assigned.not annotated		0.268131	-1.71633	0.00148524		0.493064		0.545627																						0.244419				0.0907655
AT5G66650	calcium uniporter (DUF607)	protein_coding	CHLOROPLAST-LOCALIZED MITOCHONDRIAL CALCIUM UNIPORTER (CMCU)	CHLOROPLAST-LOCALIZED MITOCHONDRIAL CALCIUM UNIPORTER (CMCU)	CMCU				0.707356	Solute transport.channels.MCU calcium uniporter complex.MCU channel component		0.129515	-1.64808	9.57124e-07	-1.2756	4.07528e-05	0.942971	0.00577272	4.14457	1.79071
AT4G12510	Encodes a member of the AZI family of lipid transfer proteins.	protein_coding	(AZI5)	(AZI5)	AZI5					not assigned.not annotated	-2.19339	0.0342629		0.933405		0.93666	-1.91122	0.0300846	-2.46383
AT1G21400	Thiamin diphosphate-binding fold (THDP-binding) superfamily protein	protein_coding							2.97395	Amino acid metabolism.degradation.branched-chain amino acid.branched-chain alpha-keto acid dehydrogenase complex.E1 2-oxoisovalerate dehydrogenase subcomplex.alpha subunit		0.0861966	-1.64469	2.83417e-11	-1.32257	1.63312e-08	0.810669	0.00159521	4.97993	2.54936																				0.0482552				-0.371411
AT3G29010	Biotin/lipoate A/B protein ligase family	protein_coding								not assigned.not annotated	-2.13748	0.024126		0.5834		NA		0.864031
AT4G34150	Calcium-dependent lipid-binding (CaLB domain) family protein	protein_coding							2.38905	not assigned.not annotated		0.908777	-1.61654	7.25405e-11	-1.10554	2.48483e-05		0.123459		2.244																				0.12		0.16665		0.225292		0.178642
AT5G24880	chromo domain cec-like protein	protein_coding								not assigned.not annotated	-2.12594	0.0417827		0.56775		NA		0.0666026
AT5G06640	Proline-rich extensin-like family protein	protein_coding	EXTENSIN 10 (EXT10)	EXTENSIN 10 (EXT10)	EXT10					Cell wall.cell wall proteins.hydroxyproline-rich glycoproteins.extensins (EXTs).glycoproteins.classical extensin	-2.11015	0.0133443		0.887202		NA	-1.42842	0.0204637
AT4G36040	Chaperone DnaJ-domain superfamily protein	protein_coding	DNAJ11 (J11)	DNA J PROTEIN C23 (DJC23);DNAJ11 (J11)	J11				6.98309	not assigned.annotated		0.0506525	-1.61288	2.9701e-08	-1.40299	2.03107e-06	0.866395	0.00468975	2.62576	2.59254																				0.345135		0.208399		0.726182		0.862918
AT5G19240	Glycoprotein membrane precursor GPI-anchored	protein_coding							0.652997	not assigned.annotated		0.613194	-1.60498	6.08546e-08		0.0828903	1.21166	3.32493e-05																						0.0450879		0.469803		0.0138058		-0.41091
AT2G45710	Zinc-binding ribosomal protein family protein	protein_coding				eS27a				Protein biosynthesis.cytosolic ribosome.small subunit (SSU).SSU proteome.RPS27 component	-2.05102	3.22114e-09		0.62274	1.49753	5.49365e-05		0.271346	-1.40367	-1.20491																						0.465867				-0.573238
AT2G27775	PPR containing protein	protein_coding								not assigned.not annotated	-2.03336	0.010954		0.876404		0.116734		0.20209	-1.87734	-1.66543																									-1.30293	-1.30293
AT1G52342	hypothetical protein	protein_coding							0.787594	not assigned.not annotated		0.0644321	-1.57988	0.000367316	-1.12158	0.00827294	1.30557	0.00179785																						0.316184				-0.00769439
AT3G04770	40s ribosomal protein SA B	protein_coding	40S RIBOSOMAL PROTEIN SA B (RPSAb)	40S RIBOSOMAL PROTEIN SA B (RPSAb)	RPSAb	uS2b				Protein biosynthesis.cytosolic ribosome.small subunit (SSU).SSU proteome.RPSa component	-2.02356	0.000171426		0.311631		0.240276	-1.72021	8.73549e-06	-2.23123																							-0.984403				0.03827
AT4G37450	AGP18 is a lysine-rich arabinogalactan-protein (AGP) and part of a multi-gene family of glycoproteins with approx. 50 members. It falls into one subclass with AGP17 and AGP19, other lysine-rich AGPs. It is expressed in young leaves, shoots, roots and flowers and is active in the regulation of the selection and survival of megaspores.	protein_coding	ARABINOGALACTAN PROTEIN 18 (AGP18)	(ATAGP18);ARABINOGALACTAN PROTEIN 18 (AGP18)	AGP18				0.911293	Cell wall.cell wall proteins.hydroxyproline-rich glycoproteins.arabinogalactan proteins (AGPs).glycoproteins.lysine-rich arabinogalactan protein		0.320493	-1.57973	1.79796e-05	-1.90837	5.47215e-07		0.0502408	-1.44812	-1.32843																				0.41792	1.35915	1.35915	1.57533	1.57533		0.634105
AT2G37560	Origin Recognition Complex subunit 2. Involved in the initiation of DNA replication. Regulated transcriptionally during cell cycle, peaking at G1/S-phase. Target of E2F/DF family of transcription factors. Interacts strongly with all ORC subunits.	protein_coding	ORIGIN RECOGNITION COMPLEX SECOND LARGEST SUBUNIT 2 (ORC2)	ORIGIN RECOGNITION COMPLEX SECOND LARGEST SUBUNIT 2 (ATORC2);ORIGIN RECOGNITION COMPLEX SECOND LARGEST SUBUNIT 2 (ORC2)	ORC2					Cell cycle.interphase.DNA replication.preinitiation.origin recognition complex.ORC2 component	-1.9999	0.0233889		0.757098		NA		0.455601	-2.47537
AT5G25757	RNA polymerase I-associated factor PAF67	protein_coding								Protein biosynthesis.translation initiation.pre-initiation complex (PIC).eIF3 mRNA-to-PIC binding complex.eIF3l component	-1.98208	3.22114e-09		0.838888		0.444419	-1.48151	1.40119e-08
AT3G44430	transmembrane protein	protein_coding								not assigned.not annotated	-1.97717	4.63201e-05		0.180321		0.609754	-0.952133	0.0185609																								0.0671142				0.710493
AT5G57280	Gene encodes a methyltransferase-like protein involved in pre-rRNA processing.	protein_coding	ROOT INITIATION DEFECTIVE 2 (RID2)		RID2					RNA processing.RNA modification.rRNA/tRNA methylation.rRNA guanosine methyltransferase (RID2/Bud23/WBSCR22)	-1.96757	6.10061e-05		0.111753	1.16641	0.041276	-1.46559	7.7729e-06	-1.71282																							-0.643306				-0.2144
AT3G28900	Ribosomal protein L34e superfamily protein	protein_coding				eL34c				Protein biosynthesis.cytosolic ribosome.large subunit (LSU).LSU proteome component.RPL34 component	-1.96472	2.84461e-22		0.918131	0.775692	0.00113232	-1.22454	3.04052e-12		-1.84394																				-0.24257		-0.358894		-0.505891		-0.389567
AT5G35190	proline-rich extensin-like family protein	protein_coding	EXTENSIN 13 (EXT13)	EXTENSIN 13 (EXT13)	EXT13					Cell wall.cell wall proteins.hydroxyproline-rich glycoproteins.extensins (EXTs).glycoproteins.classical extensin	-1.96279	0.040556		0.908445		NA	-2.14372	0.00266683
AT5G41080	Encodes a member of the glycerophosphodiester phosphodiesterase (GDPD) family.	protein_coding	GLYCEROPHOSPHODIESTER PHOSPHODIESTERASE 2 (GDPD2)	(AtGDPD2);GLYCEROPHOSPHODIESTER PHOSPHODIESTERASE 2 (GDPD2)	GDPD2				1.1631	not assigned.annotated	1.67431	1.03126e-17	-1.56848	3.26409e-14	-1.49721	5.67237e-14	1.74558	9.62427e-19	3.91063	4.72856	0.31	0.25	-0.46	0.064	-0.23	0.36	0.55	0.0055												0.280736		-0.617384		-0.24381		0.654311
AT3G30775	Encodes a proline oxidase that is predicted to localize to the inner mitochondrial membrane, its mRNA expression induced by high levels of Al and by osmotic stress. The promoter contains an L-proline-inducible element.	protein_coding	EARLY RESPONSIVE TO DEHYDRATION 5 (ERD5)	EARLY RESPONSIVE TO DEHYDRATION 5 (ERD5);PROLINE DEHYDROGENASE (PRODH); (AT-POX);PROLINE DEHYDROGENASE 1 (PDH1); (ATPDH); (PRO1);ARABIDOPSIS THALIANA PROLINE OXIDASE (ATPOX)	ERD5				0.627071	Amino acid metabolism.degradation.proline.proline dehydrogenase	1.35632	2.60471e-15	-1.54174	1.13389e-18	-1.20643	1.12468e-11	1.69163	2.09073e-23	3.19295	4.57091																				0.519028		-0.124179		-0.074547		0.568661
AT2G18220	Noc2p family	protein_coding	NUCLEOLAR COMPLEX ASSOCIATED 2 (NOC2)	(ATNOC2);NUCLEOLAR COMPLEX ASSOCIATED 2 (NOC2)	NOC2					not assigned.annotated	-1.93372	4.58202e-07	0.768371	0.0209939	1.2178	0.00478382	-1.48429	6.82757e-08	-1.84422																							-0.34645				-0.0631938
AT3G50480	Homolog of RPW8	protein_coding	HOMOLOG OF RPW8 4 (HR4)	HOMOLOG OF RPW8 4 (HR4)	HR4				1.67176	not assigned.annotated		0.847095	-1.53292	0.000266296		0.253809	1.09465	0.00696071	1.95407	2.04444																								-0.406722
AT4G05410	Encodes a nucleolar protein with seven WD40-repeats that plays a role in embryo sac development and is critical for the correct positioning of the division plane of zygote and the apical cell lineage in Arabidopsis. YAO may act by modulating nucleolar function, such as rRNA biogenesis, during early embryogenesis and gametogenesis.	protein_coding	YAOZHE (YAO)	YAOZHE (YAO)	YAO					Protein biosynthesis.cytosolic ribosome.small subunit (SSU).SSU processome.Rrp9/YAO1 assembly factor	-1.92707	2.29424e-05		0.0628106		0.0549552	-1.68373	1.91456e-06	-2.07647																							-0.923038				0.116918
AT4G13340	Leucine rich extensin protein involved in cell wall biogenesis and organization. Interacts with several members of the RALF family of ligand peptides.	protein_coding	LEUCINE-RICH REPEAT/EXTENSIN 3 (LRX3)	LEUCINE-RICH REPEAT/EXTENSIN 3 (LRX3)	LRX3				3.66769	Cell wall.cell wall proteins.hydroxyproline-rich glycoproteins.extensins (EXTs).glycoproteins.LRR-domain extensin		0.653419	-1.52485	4.53757e-09	-1.16756	1.76329e-05		0.0674145		1.52067																				0.0829614		0.220465		0.259494		0.121991
AT2G21090	Pentatricopeptide repeat (PPR-like) superfamily protein	protein_coding								not assigned.annotated	-1.90926	0.000473653		0.667266		0.239408	-1.32284	0.000239712
AT3G46550	Isolated in a screen for salt hypersensitive mutants. Mutants have thinner cell walls, abnormal siliques and root growth is inhibited under salt stress. The gene has similarity to arabinogalactan proteins and domains associated with cell adhesion.SOS5 is required for normal mucilage adherence to seeds.	protein_coding	SALT OVERLY SENSITIVE 5 (SOS5)	FASCICLIN-LIKE ARABINOGALACTAN-PROTEIN 4 (FLA4);SALT OVERLY SENSITIVE 5 (SOS5)	SOS5				2.65555	External stimuli response.salinity.SOS (Salt Overly Sensitive) signalling pathway.SOS5 component		0.358039	-1.48607	9.9136e-07	-1.24924	0.000130304		0.757809		-1.45375	0.06	0.51	-0.18	0.039	-0.3	0.0095	-0.06	0.86												0.573839	1.10881	1.10881		0.691133		0.156159
AT4G37090	UDP-N-acetylmuramoyl-L-alanyl-D-glutamate-2, 6-diaminopimelate ligase	protein_coding								not assigned.not annotated	-1.89004	1.0409e-05		0.977829	1.246	0.0092042	-0.660682	0.0455537	-1.48462																							-0.680721				-0.150825
AT1G70600	Ribosomal protein L18e/L15 superfamily protein	protein_coding				uL15c				Protein biosynthesis.cytosolic ribosome.large subunit (LSU).LSU proteome component.RPL27a component	-1.88651	6.60122e-45		0.744291	0.611715	8.76453e-05	-1.34392	6.07655e-30		-1.50829																				-0.143591		-0.152003		-0.226592		-0.21818
AT5G59850	Ribosomal protein S8 family protein	protein_coding				uS8f				Protein biosynthesis.cytosolic ribosome.small subunit (SSU).SSU proteome.RPS15a component	-1.88572	3.94076e-18		0.522729	0.849153	0.000764869	-1.23812	1.15136e-09	-1.48281	-1.60351	-0.1	0.26	0.04	0.71	0.13	0.11	-0.01	0.79												-0.10276		-0.310701		-0.464281		-0.25634
AT5G44306	This gene encodes a small protein and has either evidence of transcription or purifying selection.	protein_coding								not assigned.not annotated	-1.8828	0.0283121		0.483083		NA		0.878844
AT5G49480	AtCP1 encodes a novel Ca2+-binding protein, which shares sequence similarities with calmodulins. The expression of AtCP1 is induced by NaCl. The mRNA is cell-to-cell mobile.	protein_coding	CA2+-BINDING PROTEIN 1 (CP1)	CA2+-BINDING PROTEIN 1 (ATCP1);CA2+-BINDING PROTEIN 1 (CP1)	CP1					not assigned.annotated	-1.8816	1.06889e-27	-0.513448	0.00350952		0.46041	-1.583	5.34628e-25	-1.52776																					-0.294977		-0.231783		-0.311202		-0.374396
AT1G16110	Encodes a WAK-like receptor-like kinase with a cytoplasmic Ser/Thr protein kinase domain and an extracellular domain with EGF-like repeats. It has been shown to be localized to the cell wall.	protein_coding	WALL ASSOCIATED KINASE-LIKE 6 (WAKL6)	WALL ASSOCIATED KINASE-LIKE 6 (WAKL6)	WAKL6				1.10526	Protein modification.phosphorylation.TKL kinase superfamily.WAK/WAKL kinase		0.897868	-1.48169	0.0220036		NA		0.165116		1.01636
AT2G17630	Pyridoxal phosphate (PLP)-dependent transferases superfamily protein	protein_coding	PHOSPHOSERINE AMINOTRANSFERASE 2 (PSAT2)	PHOSPHOSERINE AMINOTRANSFERASE 2 (PSAT2)	PSAT2					Amino acid metabolism.biosynthesis.serine family.non-photorespiratory serine.phosphoserine aminotransferase	-1.87188	1.99664e-05		0.139691		0.220122	-1.77626	5.86078e-08	-2.32831	-2.26906	0.21	0.54	-0.58	0.088	-0.56	0.021	0.23	0.91														-0.518031				0.720716
AT4G13830	DnaJ-like protein (J20); nuclear gene	protein_coding	DNAJ-LIKE 20 (J20)	DNA J PROTEIN C26 (DJC26);DNAJ-LIKE 20 (J20)	J20				2.64579	not assigned.annotated	1.13671	1.21656e-05	-1.4753	4.01454e-07	-1.03292	3.52637e-05	1.5791	1.13528e-09	2.06934	0.133991																				0.378512				0.114257
AT3G18320	F-box and associated interaction domains-containing protein	protein_coding							0.482143	not assigned.annotated		0.553768	-1.46967	0.0373459		NA	1.37807	0.0282165
AT1G71030	Encodes a putative myb family transcription factor. In contrast to most other myb-like proteins its myb domain consists of a single repeat. A proline-rich region potentially involved in transactivation is found in the C-terminal part of the protein. Its transcript accumulates mainly in leaves.	protein_coding	MYB-LIKE 2 (MYBL2)	MYB-LIKE 2 (MYBL2);ARABIDOPSIS MYB-LIKE 2 (ATMYBL2)	MYBL2				1.55306	RNA biosynthesis.transcriptional activation.MYB superfamily.MYB transcription factor		0.665714	-1.46327	5.86121e-07	-1.08924	0.00025084		0.0823847	2.365	1.39191																				0.389042		0.569615		0.337581		0.157009
AT4G27280	Calcium-binding EF-hand family protein	protein_coding							0.559528	not assigned.annotated		0.120649	-1.46121	4.16998e-09	-1.05414	3.30128e-05	0.873515	0.000562995		2.64378																				0.133856		-0.026967		0.050836		0.211659
AT3G57490	Ribosomal protein S5 family protein	protein_coding				uS5d				Protein biosynthesis.cytosolic ribosome.small subunit (SSU).SSU proteome.RPS2 component	-1.85889	4.69061e-06		0.0938646		0.113346	-1.70528	6.1775e-08	-2.19921	-1.09463																				-0.801565	-1.1943	-1.1943		0.141176		0.533915
AT1G58380	Ribosomal protein S5 family protein	protein_coding	(XW6)	(XW6)	XW6	uS5a				Protein biosynthesis.cytosolic ribosome.small subunit (SSU).SSU proteome.RPS2 component	-1.85104	1.35916e-09		0.196004		0.0768217	-1.58676	2.14761e-10	-1.04059	-1.35661	-0.11	0.33	-0.06	0.22	0.04	0.74	-0.01	0.94
AT3G21055	Encodes photosystem II 5 kD protein subunit PSII-T. This is a nuclear-encoded gene (PsbTn) which also has a plastid-encoded paralog (PsbTc).	protein_coding	PHOTOSYSTEM II SUBUNIT T (PSBTN)	PHOTOSYSTEM II SUBUNIT T (PSBTN)	PSBTN				0.533553	Photosynthesis.photophosphorylation.photosystem II.PS-II complex.component PsbTn		0.793094	-1.4562	0.000224877	-1.53099	0.000117074		0.877944		-1.60372																				0.415037		0.736966		0.963474		0.641546
AT5G67400	root hair specific 19	protein_coding	ROOT HAIR SPECIFIC 19 (RHS19)	ROOT HAIR SPECIFIC 19 (RHS19)	RHS19					not assigned.annotated	-1.84554	1.94617e-06		0.11352		0.124057	-1.70519	4.8415e-08																						-0.339089		0.298341		0.39173		-0.2457
AT5G58650	Encodes PSY1, an18-aa tyrosine-sulfated glycopeptide that promotes cellular proliferation and expansion. PSY1 is widely expressed in various tissues, including shoot apical meristem, and is highly up-regulated by wounding. Perception of PSY1 depends on At1g72300, a leucine-rich repeat receptor kinase (LRR-RK).	protein_coding	PLANT PEPTIDE CONTAINING SULFATED TYROSINE 1 (PSY1)	PLANT PEPTIDE CONTAINING SULFATED TYROSINE 1 (PSY1)	PSY1				2.06045	not assigned.annotated	1.03311	0.0246442	-1.44596	0.00244928	-1.28129	0.00287485	1.19778	0.00736395	2.12784	1.99764																				0.359896				-0.0968615
AT5G07900	Mitochondrial transcription termination factor family protein	protein_coding								RNA biosynthesis.organelle machineries.transcription.mTERF transcription factor	-1.84083	0.00699416		0.797702		0.497788	-0.991958	0.0446182	-1.4814	-1.68354																						-0.405256				-0.363963
AT5G43450	encodes a protein whose sequence is similar to ACC oxidase	protein_coding							0.202869	Enzyme classification.EC_1 oxidoreductases.EC_1.14 oxidoreductase acting on paired donor with incorporation or reduction of molecular oxygen		0.166804	-1.44384	3.14778e-07		0.0560079		0.458423	1.35025																					0.402098		0.20014		-0.100929		0.10103
AT4G01560	Ribosomal RNA processing Brix domain protein	protein_coding	MATERNAL EFFECT EMBRYO ARREST 49 (MEE49)	MATERNAL EFFECT EMBRYO ARREST 49 (MEE49)	MEE49					not assigned.not annotated	-1.84005	4.82388e-10		0.532449	0.906413	0.00911489	-1.14858	2.06926e-07	-1.69029																					-0.19388		-0.203795		-0.448358		-0.438442
AT5G52050	MATE efflux family protein	protein_coding	DETOXIFICATION EFFLUX CARRIER 50 (DTX50)	(ATDTX50);DETOXIFICATION EFFLUX CARRIER 50 (DTX50)	DTX50				3.27273	Solute transport.carrier-mediated transport.MOP superfamily.MATE family.metabolite transporter (DTX-type)		0.449922	-1.44352	0.00884289	-1.84341	0.00185341		0.122849		3.0231
AT1G80180	Encodes a substrate of the MAPK kinases. Phenotypic analyses of Arabidopsis expressing phosphorylation site mutant forms of At1g80180.1 showed clustered stomata and higher stomatal index in cotyledons expressing the phosphomimetic form of At1g80180.1.	protein_coding							0.440997	not assigned.annotated		0.352821	-1.43788	0.000139245	-1.66553	6.03129e-06		0.671202	2.67253																					-0.0238467		0.21901	1.1375	1.1375		0.894647
AT2G17250	Encodes a nucleolar protein that is a ribosome biogenesis co-factor. Mutants display aberrant RNA processing and homozygous embryos arrest in the globular stage of development.	protein_coding	EMBRYO DEFECTIVE 2762 (EMB2762)	EMBRYO DEFECTIVE 2762 (EMB2762);NUCLEOLAR COMPLEX ASSOCIATED 4 (NOC4)	EMB2762					Protein biosynthesis.cytosolic ribosome.small subunit (SSU).SSU processome.NOC4 assembly factor	-1.83561	4.41259e-07		0.38525		0.0691839	-1.36805	1.80885e-06	-1.5164																							-0.9631				-0.254317
AT1G76590	PLATZ transcription factor family protein	protein_coding							1.86504	RNA biosynthesis.transcriptional activation.PLATZ transcription factor		0.698149	-1.43758	0.00624862		0.0851056		0.150012	2.11938	2.51972
AT3G47370	Ribosomal protein S10p/S20e family protein	protein_coding				uS10b				Protein biosynthesis.cytosolic ribosome.small subunit (SSU).SSU proteome.RPS20 component	-1.82654	4.31758e-16		0.616429		0.093826	-1.15514	1.88659e-08	-1.22782	-1.62279																				-0.774188		-0.109498		0.140481		-0.524208
AT5G02020	Encodes a protein involved in salt tolerance, names SIS (Salt Induced Serine rich).	protein_coding	SALT INDUCED SERINE RICH (SIS)	SALT INDUCED SERINE RICH (SIS)	SIS				3.67113	not assigned.not annotated		0.346124	-1.43582	0.00304641		0.33214	1.42491	0.00109301	2.95885	1.23837																			1.02046	1.02046				-0.595158
AT1G35140	EXL1 is involved in the C-starvation response. Phenotypic changes of an exl1 loss of function mutant became evident only under corresponding experimental conditions. For example, the mutant showed diminished biomass production in a short-day/low light growth regime, impaired survival during extended night, and impaired survival of anoxia stress.	protein_coding	PHOSPHATE-INDUCED 1 (PHI-1)	PHOSPHATE-INDUCED 1 (PHI-1);EXORDIUM LIKE 7 (EXL7);EXORDIUM LIKE 1 (EXL1)	PHI-1				1.06731	not assigned.annotated		0.486922	-1.43294	1.72655e-09	-1.81476	3.77282e-15		0.705295	4.12928	4.48617																				0.249359		-0.38807		0.355875		0.993305
AT5G03995	hypothetical protein	protein_coding							0.673941	not assigned.not annotated		0.910813	-1.4315	0.0376757		NA		0.196221
AT3G16140	Encodes subunit H of photosystem I reaction center subunit VI.	protein_coding	PHOTOSYSTEM I SUBUNIT H-1 (PSAH-1)	PHOTOSYSTEM I SUBUNIT H-1 (PSAH-1)	PSAH-1				1.30115	Photosynthesis.photophosphorylation.photosystem I.PS-I complex.component PsaH		0.451092	-1.42863	6.28343e-12	-1.48312	6.75218e-13		0.558693			0.17	0.057	0.1	0.27	-0.11	0.36	-0.04	0.68												0.587177		0.722265		0.442435		0.307347
AT3G59880	hypothetical protein	protein_coding							1.5	not assigned.not annotated		0.961375	-1.42799	0.0493166		NA		0.925232
AT1G19770	Member of a family of proteins related to PUP1, a purine transporter. May be involved in the transport of purine and purine derivatives such as cytokinins, across the plasma membrane. The mRNA is cell-to-cell mobile.	protein_coding	PURINE PERMEASE 14 (PUP14)	PURINE PERMEASE 14 (ATPUP14);PURINE PERMEASE 14 (PUP14)	PUP14				1.04372	Solute transport.carrier-mediated transport.DMT superfamily.PUP organic cation transporter	0.99552	4.7822e-08	-1.42706	3.26409e-14	-1.08321	1.93623e-09	1.33937	7.46669e-14		1.26336																				0.320787		0.0113599		0.0842365		0.393664
AT2G24990	Serine/threonine-protein kinase Rio1	protein_coding								Protein modification.phosphorylation.atypical kinase families.RIO kinase	-1.78466	5.22642e-06		0.262	0.988941	0.0313796	-1.22388	1.41199e-05																								-0.342888				0.16601
AT5G55920	Encodes a homolog of the S. cerevisiae Nop2 that is involved in ribosome biogenesis and plays a role on organ size control by promoting cell proliferation and preventing compensation in normal leaf development.	protein_coding	OLIGOCELLULA 2 (OLI2)	OLIGOCELLULA 2 (OLI2); (ATTRM4C);TRNA METHYLTRANSFERASE 4C (TRM4C); (NOP2A)	OLI2					Protein biosynthesis.cytosolic ribosome.large subunit (LSU).LSU processome component.OLI2 maturation factor	-1.77749	2.27874e-09	0.831931	0.00449387	0.823755	0.0218274	-1.78566	8.87629e-13	-2.45934		-0.21	0.083	0.15	0.19	0.19	0.11	-0.17	0.26												-0.563901	-1.30986	-1.30986		-0.479168		0.266787
AT5G24030	Encodes a protein with ten predicted transmembrane helices. The SLAH3 protein has similarity to the SLAC1 protein involved in ion homeostasis in guard cells. Although it is not expressed in guard cells, it can complement an slac1-2 mutant suggesting that it performs a similar function. SLAH3:GFP localizes to the plasma membrane.	protein_coding	SLAC1 HOMOLOGUE 3 (SLAH3)	SLAC1 HOMOLOGUE 3 (SLAH3)	SLAH3				2.49153	Solute transport.channels.SLAC anion channel		0.721808	-1.41622	2.78604e-08	-1.41007	7.14149e-08		0.71151		2.2184																				-0.103093		0.321928		0.389771		-0.0352508
AT1G34030	Ribosomal protein S13/S18 family	protein_coding				uS13b				Protein biosynthesis.cytosolic ribosome.small subunit (SSU).SSU proteome.RPS18 component	-1.77542	3.427e-18		0.837438	0.654918	0.00855893	-1.19285	3.65969e-10		-1.15738																				0.169925		-0.184425		-0.528379		-0.174029
AT5G60790	member of GCN subfamily	protein_coding	ATP-BINDING CASSETTE F1 (ABCF1)	ARABIDOPSIS THALIANA GENERAL CONTROL NON-REPRESSIBLE 1 (ATGCN1);ATP-BINDING CASSETTE F1 (ABCF1);GENERAL CONTROL NON-REPRESSIBLE 1 (GCN1)	ABCF1					not assigned.annotated	-1.77534	4.99863e-21	0.541259	0.00955494	0.786706	0.000287253	-1.5299	1.20007e-18			-0.04	0.97	0.48	0.00095	0.42	0.014	-0.1	0.2												-0.782409		-0.707447		-0.120294		-0.195256
AT5G42100	encodes a plasmodesmal (Pd)-associated membrane protein involved in plasmodesmal callose degradation, i.e. beta-1,3-glucanase (EC 3.2.1.39), and functions in the gating of Pd	protein_coding	BETA-1,3-GLUCANASE_PUTATIVE (BG_PPAP)	ARABIDOPSIS THALIANA BETA-1,3-GLUCANASE_PUTATIVE (ATBG_PPAP);BETA-1,3-GLUCANASE_PUTATIVE (BG_PPAP); (ATBG_PAP)	BG_PPAP				3.49168	Enzyme classification.EC_3 hydrolases.EC_3.2 glycosylase		0.650998	-1.41093	1.40661e-09	-1.66849	5.95615e-13		0.126699																						0.650002	1.0366	1.0366	1.22343	1.22343		0.836835
AT5G17350	hypothetical protein	protein_coding							1.239	not assigned.not annotated		0.75029	-1.40193	0.00793084		0.194191		0.635017																						-0.482152				0.577309
AT1G17590	nuclear factor Y, subunit A8	protein_coding	NUCLEAR FACTOR Y, SUBUNIT A8 (NF-YA8)	NUCLEAR FACTOR Y, SUBUNIT A8 (NF-YA8)	NF-YA8				0.840643	RNA biosynthesis.transcriptional activation.NF-Y transcription factor complex.NF-YA component		0.236288	-1.38203	0.0447297		NA		0.739825
AT1G21680	DPP6 N-terminal domain-like protein	protein_coding							0.854078	not assigned.not annotated		0.775606	-1.3816	2.0097e-08	-1.31527	8.35403e-08		0.602367	3.00303																					0.618321		-0.278301		-0.217591		0.679031
AT1G67740	PsbY precursor (psbY) mRNA. This single nuclear gene is imported into the chloroplasts where it is processed into two integral membrane proteins with identical topology (PsbY-1 and PsbY-2). The protein appears to bind manganese. Important for the redox control of cytochrome b559.	protein_coding	PHOTOSYSTEM II BY (PSBY)	(YCF32);PHOTOSYSTEM II BY (PSBY)	PSBY				2.54244	Photosynthesis.photophosphorylation.photosystem II.PS-II complex.component PsbY		0.632832	-1.37843	1.13834e-08	-1.327	7.14149e-08		0.479088		-1.08182	0.06	0.86	0.06	0.84	0.17	0.26	0.18	0.5												0.368306		0.665081		0.715432		0.418658
AT1G23280	MAK16 protein-like protein	protein_coding								not assigned.not annotated	-1.761	7.94209e-07		0.215612	0.853793	0.0495238	-1.38584	2.28932e-06	-1.50517		0.03	0.96	0.17	0.6	0.12	0.27	-0.01	0.95												0.266787		-0.696219		-0.505235		0.45777
AT2G17670	Tetratricopeptide repeat (TPR)-like superfamily protein	protein_coding								not assigned.annotated	-1.74807	0.0051083		0.843712		0.110784		0.13493	-1.53621																							-0.162553				-0.367305
AT5G40830	S-adenosyl-L-methionine-dependent methyltransferases superfamily protein	protein_coding								not assigned.not annotated	-1.74706	0.00078589		0.431811		0.207179	-1.31487	0.000167741	-1.48203	-1.50415																						-0.732304				0.403356
AT3G05060	SAR DNA-binding protein, putative, strong similarity to SAR DNA-binding protein-1 (Pisum sativum) GI:3132696; contains Pfam profile PF01798: Putative snoRNA binding domain; encodes NOP58-like protein	protein_coding								RNA processing.RNA modification.rRNA/tRNA methylation.C/D small nucleolar ribonucleoprotein (snoRNP) rRNA methylation complex.Nop58 snoRNP scaffold component	-1.74189	1.3762e-07	0.912588	0.00822733	1.23228	0.000693576	-1.42221	2.52661e-06	-1.95346	-1.01133	0.23	0.083	0.18	0.14	0.06	0.71	0.11	0.083												-0.280552	-1.19977	-1.19977		-0.883942		0.0352755
AT5G61020	evolutionarily conserved C-terminal region 3	protein_coding	EVOLUTIONARILY CONSERVED C-TERMINAL REGION 3 (ECT3)	EVOLUTIONARILY CONSERVED C-TERMINAL REGION 3 (ECT3)	ECT3					not assigned.not annotated	-1.74046	1.76449e-19	0.559834	0.00655297	0.534639	0.0297607	-1.76565	6.90341e-25	-1.295																					-0.358192		-0.872765		-0.330149		0.184425
AT3G59370	Vacuolar calcium-binding protein-like protein	protein_coding								not assigned.not annotated	-1.73215	0.0260476		0.928914		0.901736	-1.65076	0.0102375			0.15	0.18	0.96	0	0.8	0	-0.02	0.66														-0.212849				-0.202189
AT5G23130	Peptidoglycan-binding LysM domain-containing protein	protein_coding							0.214286	not assigned.not annotated		0.537137	-1.36586	0.00212611		0.21192		0.630864	1.11708
AT3G19300	Protein kinase superfamily protein	protein_coding								Protein modification.phosphorylation.TKL kinase superfamily.URK kinase families.URK-1 kinase	-1.71813	0.0260476		0.897324		0.461157		0.170808
AT3G46270	receptor protein kinase-like protein	protein_coding								not assigned.annotated	-1.71805	0.0283888		0.986233		0.950168	-1.60691	0.00568155
AT2G01290	Cytosolic ribose-5-phosphate isomerase. Knockout mutation causes chloroplast dysfunction, late flowering and premature cell death.	protein_coding	RIBOSE-5-PHOSPHATE ISOMERASE 2 (RPI2)	RIBOSE-5-PHOSPHATE ISOMERASE 2 (RPI2)	RPI2					Carbohydrate metabolism.oxidative pentose phosphate pathway.non-oxidative phase.ribose 5-phosphate isomerase	-1.71522	0.00154359		0.12773		0.151423	-1.8294	0.000228939		-1.00818																				-0.222392		-0.283793		0.0297473		0.0911479
AT5G61170	Ribosomal protein S19e family protein	protein_coding				eS19c				Protein biosynthesis.cytosolic ribosome.small subunit (SSU).SSU proteome.RPS19 component	-1.71057	7.40967e-33		0.128966	0.681019	2.75166e-05	-1.27285	1.16689e-26	-1.17015	-1.59189																				0.338169		0.113382		-0.521769		-0.296982
AT1G11260	Encodes a H+/hexose cotransporter. The mRNA is cell-to-cell mobile.	protein_coding	SUGAR TRANSPORTER 1 (STP1)	SUGAR TRANSPORTER 1 (ATSTP1);SUGAR TRANSPORTER 1 (STP1)	STP1				2.33082	Solute transport.carrier-mediated transport.MFS superfamily.SP family.monosaccharide transporter (STP-type)		0.697206	-1.36116	2.11591e-05	-1.19788	0.0003406		0.950258	3.28644	2.14626	0.56	0.2	0.51	0.26	0.1	1	0.15	0.52												0.463132		0.0946369		-0.0480943		0.320401
AT5G44060	embryo sac development arrest protein	protein_coding							7.20834	not assigned.not annotated		0.69581	-1.35654	0.00320522		0.24891		0.448598																						-0.736966			1.85798	1.85798
AT4G17490	Encodes a member of the ERF (ethylene response factor) subfamily B-3 of ERF/AP2 transcription factor family (ATERF-6). The protein contains one AP2 domain. There are 18 members in this subfamily including ATERF-1, ATERF-2, AND ATERF-5. It is involved in the response to reactive oxygen species and light stress.	protein_coding	ETHYLENE RESPONSIVE ELEMENT BINDING FACTOR 6 (ERF6)	ETHYLENE RESPONSIVE ELEMENT BINDING FACTOR 6 (ATERF6);ETHYLENE RESPONSIVE ELEMENT BINDING FACTOR 6 (ERF6); (ERF-6-6)	ERF6				4.70674	RNA biosynthesis.transcriptional activation.AP2/ERF superfamily.ERF-type transcription factor	1.13456	0.0051083	-1.35428	0.00153459	-1.09894	0.00646532	1.3899	0.000325157	2.10418	3.23193																				-0.247928				0.219169
AT4G35770	Senescence-associated gene that is strongly induced by phosphate starvation. Transcripts are differentially regulated at the level of mRNA stability at different times of day. mRNAs are targets of the mRNA degradation pathway mediated by the downstream (DST) instability determinant.	protein_coding	SENESCENCE 1 (SEN1)	SENESCENCE 1 (SEN1);DARK INDUCIBLE 1 (DIN1);ARABIDOPSIS THALIANA SENESCENCE 1 (ATSEN1);SENESCENCE ASSOCIATED GENE 1 (SEN1)	SEN1				0.686664	not assigned.annotated	1.04667	3.27872e-08	-1.34198	7.28246e-12	-0.938052	1.38832e-06	1.4506	2.92175e-15	6.02621	3.19007																				0.347923		-0.164811		-0.360272		0.152462
AT1G63250	DEA(D/H)-box RNA helicase family protein	protein_coding								not assigned.annotated	-1.68607	0.0194242		0.346607		0.144242	-1.08766	0.0205714	-2
AT4G11211	hypothetical protein	protein_coding							2.43216	not assigned.not annotated		0.431105	-1.3401	0.0431444		0.146432		0.138303		-1.79435
AT3G49080	Mitochondrial ribosomal protein, similar to RPS9 from E.coli. Loss of function results in gametophyte lethality, particularly the megagametophyte.	protein_coding	RIBOSOMAL PROTEIN S9 M (RPS9M)	RIBOSOMAL PROTEIN S9 M (RPS9M)	RPS9M		uS9m			Protein biosynthesis.organelle translation machineries.mitochondrial ribosome.small subunit proteome.mtRPS9 component	-1.6778	9.91868e-07		0.172863		0.076183	-1.37945	4.77118e-08	-1.05871		-0.2	0.43	0.19	0.61	0.33	0.1	-0.05	0.64												0.0771679		-0.420332		-0.455679		0.0418202
AT5G47560	Encodes a tonoplast malate/fumarate transporter.	protein_coding	TONOPLAST DICARBOXYLATE TRANSPORTER (TDT)	(ATSDAT);TONOPLAST DICARBOXYLATE TRANSPORTER (ATTDT);TONOPLAST DICARBOXYLATE TRANSPORTER (TDT)	TDT				2.53872	Solute transport.carrier-mediated transport.IT superfamily.DASS family.di-/tricarboxylate transporter (TDT-type)		0.156748	-1.33462	4.22714e-17	-1.40373	3.96648e-19		0.285848	2.24345	1.49042																				0.343145		-0.026967		0.272655		0.642767
AT3G50560	NAD(P)-binding Rossmann-fold superfamily protein	protein_coding							0.71831	not assigned.not annotated	0.887822	1.01706e-05	-1.29738	2.46468e-10	-1.3942	1.67104e-13	0.790999	0.000113336	2.27315		0.1	0.57	-0.67	0.0018	-0.57	0.00053	0.21	0.11												0.345996		-0.34915		-0.186596		0.508549
AT3G15353	metallothionein, binds to and detoxifies excess copper and other metals, limiting oxidative damage	protein_coding	METALLOTHIONEIN 3 (MT3)	(ATMT3);METALLOTHIONEIN 3 (MT3)	MT3				0.450975	not assigned.not annotated		0.875037	-1.29516	0.000185851	-0.962467	0.0101071		0.303816																						0.190331		0.736966		0.475551		-0.0710831
AT3G07430	YLMG is located in thylakoid membranes. It is involved in chloroplast division and more specifically the proper distribution of nucleoids. The function is conserved between cyanobacteria and chloroplasts.The mRNA is cell-to-cell mobile.	protein_coding	(YLMG1-1)	EMBRYO DEFECTIVE 1990 (emb1990); (ATYLMG1-1); (YLMG1-1)	YLMG1-1					not assigned.annotated	-1.67001	3.55775e-17		0.0664536		0.762731	-1.14373	2.01093e-10		-1.55348																				-0.0295443		0.0193653		0.0392594		-0.00965017
AT1G22890	Secreted peptide which functions in plant growth and pathogen defense.	protein_coding	(STMP2)	(STMP2)	STMP2				0.264655	not assigned.not annotated		0.761192	-1.29332	0.0468631		0.129693		0.458002	3.19387	1.35345																				0.874469				0.0907655
AT3G12830	SAUR-like auxin-responsive protein family	protein_coding	SMALL AUXIN UPREGULATED 72 (SAUR72)	SMALL AUXIN UPREGULATED 72 (SAUR72)	SAUR72				2.25544	not assigned.annotated		0.0727602	-1.28998	0.00982522		0.355821	1.663	7.27487e-05		1.32715																				0.471504				0.482301
AT1G16130	Encodes a WAK-like receptor-like kinase with a cytoplasmic Ser/Thr protein kinase domain and an extracellular domain with EGF-like repeats.	protein_coding	WALL ASSOCIATED KINASE-LIKE 2 (WAKL2)	WALL ASSOCIATED KINASE-LIKE 2 (WAKL2)	WAKL2				0.811613	Protein modification.phosphorylation.TKL kinase superfamily.WAK/WAKL kinase		0.44108	-1.28843	0.0386339		0.142837		0.12373	1.41551	3.43508
AT2G19640	ASH1-related protein 2	protein_coding	ASH1-RELATED 2 (ASHR2)	ASH1-RELATED 2 (ASHR2)	ASHR2					not assigned.annotated	-1.65088	0.00864635		0.416469		0.42683	-1.4906	0.00110619																								-0.578173				0.412495
AT2G44860	Ribosomal protein L24e family protein	protein_coding				uL24c				Protein biosynthesis.cytosolic ribosome.large subunit (LSU).LSU proteome component.RPL24 component	-1.64958	1.57536e-09		0.602317	1.00136	0.0009924	-0.832939	0.000288431	-1.40183																					-0.458488		-0.407504		-0.496889		-0.547873
AT1G62110	Mitochondrial transcription termination factor family protein	protein_coding								RNA biosynthesis.organelle machineries.transcription.mTERF transcription factor	-1.64952	0.0211524		0.64698		0.116475		0.140786
AT4G18205	Nucleotide-sugar transporter family protein	protein_coding	PURINE PERMEASE 21 (PUP21)	(ATPUP21);PURINE PERMEASE 21 (PUP21)	PUP21				2.18553	Solute transport.carrier-mediated transport.DMT superfamily.PUP organic cation transporter	1.37081	1.57393e-05	-1.28355	0.000560976	-0.70095	0.0408069	1.95341	1.74331e-10		2.8227																				0.248388				0.15678
AT1G54210	Ubiquitin-like superfamily protein	protein_coding	AUTOPHAGY 12 A (ATG12A)	AUTOPHAGY 12 A (ATG12A); (ATATG12);AUTOPHAGY 12 (APG12)	ATG12A				1.03949	Vesicle trafficking.autophagosome formation.ATG8/ATG12 conjugation system.ATG12-ATG5 ATG8-PE-ligase E3 dimer.ATG12 ubiquitin-fold component		0.942312	-1.27687	0.0214881		0.76238	1.59614	0.000567798
AT1G13160	ARM repeat superfamily protein	protein_coding								not assigned.not annotated	-1.6282	1.4204e-10		0.0820003		0.24891	-1.65449	6.95048e-17	-1.78925																							-0.763933				-0.12059
AT5G27395	Mitochondrial inner membrane translocase complex, subunit Tim44-related protein	protein_coding								not assigned.not annotated	-1.60781	0.000101641		0.437385		0.059077	-1.02593	0.000517252	-1.3																							-0.367371				-0.0144996
AT3G18535	tubulin-tyrosine ligase	protein_coding							1.60454	not assigned.not annotated		0.50688	-1.27476	0.00674612		0.126497		0.98144
AT3G53960	Major facilitator superfamily protein	protein_coding							0.814545	Solute transport.carrier-mediated transport.MFS superfamily.NRT1/PTR anion transporter		0.958503	-1.2713	0.0323397		0.441535		0.309295
AT5G43260	chaperone protein dnaJ-like protein	protein_coding							1.39678	not assigned.not annotated		0.391632	-1.26958	0.00126747	-0.966858	0.0134755		0.0708267																						-0.28658		0.72258		0.672606		-0.336554
AT5G49360	Encodes a bifunctional {beta}-D-xylosidase/{alpha}-L-arabinofuranosidase required for pectic arabinan modification. Located in the extracellular matrix. Gene is expressed specifically in tissues undergoing secondary wall thickening. This is a member of glycosyl hydrolase family 3 and has six other closely related members.	protein_coding	BETA-XYLOSIDASE 1 (BXL1)	BETA-XYLOSIDASE 1 (ATBXL1);BETA-XYLOSIDASE 1 (BXL1)	BXL1				0.391901	Cell wall.pectin.rhamnogalacturonan I.modification and degradation.alpha-L-arabinofuranosidase activities.bifunctional BXL-type alpha-L-arabinofuranosidase and beta-D-xylosidase		0.525606	-1.26795	3.24874e-15	-1.3548	2.64614e-17		0.234239	2.94467	0.908338	-0.11	0.016	-0.38	0	-0.31	0	-0.04	0.81												0.100305		-0.442222		-0.0271702		0.515357
AT5G09225	transmembrane protein	protein_coding							2.67081	not assigned.not annotated		0.897868	-1.26179	0.00117964		0.161174		0.0721979
AT4G01250	AtWRKY22 is a member of WRKY Transcription Factor; Group II-e. It is involved in regulation of dark induced leaf senescence.	protein_coding	(WRKY22)	(AtWRKY22); (WRKY22)	WRKY22				3.55204	RNA biosynthesis.transcriptional activation.WRKY transcription factor	0.787715	0.0290816	-1.26163	0.000266111	-1.22161	0.000208294	0.827732	0.0167241	2.33701	2.45624																				0.311202		-0.50696		-0.0162406		0.801921
AT3G59340	solute carrier family 35 protein (DUF914)	protein_coding								Solute transport.carrier-mediated transport.DMT superfamily.TPPT-type solute transporter	-1.58289	0.00186078		0.765952		0.354348	-1.13455	0.0026258																								-0.327575				0.537028
AT4G30270	encodes a protein similar to endo xyloglucan transferase in sequence. It is also very similar to BRU1 in soybean, which is involved in brassinosteroid response.	protein_coding	XYLOGLUCAN ENDOTRANSGLUCOSYLASE/HYDROLASE 24 (XTH24)	SENESCENCE 4 (SEN4);MERISTEM 5 (MERI-5);XYLOGLUCAN ENDOTRANSGLUCOSYLASE/HYDROLASE 24 (XTH24);MERISTEM-5 (MERI5B)	XTH24				2.36607	Enzyme classification.EC_2 transferases.EC_2.4 glycosyltransferase	1.13343	1.79161e-07	-1.26138	1.43693e-08	-0.820082	0.000533475	1.57473	4.36701e-14	4.01509	3.50914																				0.19887		0.109182		0.0351418		0.12483
AT1G71970	hypothetical protein	protein_coding							0.250954	not assigned.not annotated		0.786895	-1.25949	0.000172426	-0.750987	0.0375756		0.0587877																						0.0448542		0.600069		0.371132		-0.184083
AT5G38720	RRP7 shares limited sequence similarity to human and yeast RRP7. In Arabidopsis RRP7 functions in 18S ribosomal RNA maturation.	protein_coding	RIBOSOMAL RNA PROCESSING7 I (RRP7)	RIBOSOMAL RNA PROCESSING7 I (RRP7)	RRP7					not assigned.not annotated	-1.57617	0.00050305		0.0768393	1.08608	0.0306396	-1.18487	0.000187304	-1.38743																							-0.793549				0.302563
AT1G55960	Polyketide cyclase/dehydrase and lipid transport superfamily protein	protein_coding							0.728728	not assigned.not annotated		0.184256	-1.25292	5.86295e-07	-0.880847	0.00113884	0.790499	0.00220262																						0.422455		-0.0149503		-0.274175		0.16323
AT1G20823	Encodes a RING E3 ubiquitin ligase ATL80. Involved in phosphate mobilization and cold stress response in sufficient phosphate growth conditions. The mRNA is cell-to-cell mobile.	protein_coding	(ATATL80)	(ATATL80)	ATATL80				1.9544	Protein degradation.peptide tagging.Ubiquitin (UBQ)-anchor addition (ubiquitylation).UBQ-ligase E3 activities.RING-domain E3 ligase activities.RING-H2-type E3 ligase		0.129189	-1.24711	0.0380347	-1.26685	0.0224858		0.125116																						0.291379			1.33311	1.33311
AT3G15510	Note of caution: not to be confused with another protein (AtNAC6 locus AT5G39610) which on occasion has also been referred to as AtNAC2.	protein_coding	NAC DOMAIN CONTAINING PROTEIN 2 (NAC2)	NAC DOMAIN CONTAINING PROTEIN 2 (ATNAC2);NAC DOMAIN CONTAINING PROTEIN 2 (NAC2);NAC-REGULATED SEED MORPHOLOGY 1 (NARS1);ARABIDOPSIS NAC DOMAIN CONTAINING PROTEIN 56 (ANAC056)	NAC2				5.7506	RNA biosynthesis.transcriptional activation.NAC transcription factor		0.945165	-1.24668	0.0455105		0.681515		0.195561
AT4G32340	Tetratricopeptide repeat (TPR)-like superfamily protein	protein_coding							2.2394	not assigned.not annotated		0.559872	-1.23628	0.0150467	-1.38478	0.00495433		0.720354																						-0.747613				0.285859
AT1G23205	Plant invertase/pectin methylesterase inhibitor superfamily protein	protein_coding							0.724771	not assigned.annotated		0.715531	-1.235	2.07361e-05	-1.08478	0.000378327		0.965144		-2.61667																				0.422455		0.708426		0.279128		-0.00684284
AT1G12040	encodes a a chimeric leucine-rich repeat/extensin protein that regulates root hair morphogenesis and elongation. Null mutants develop root hairs that frequently abort, swell, or branch. Gene is expressed in root hair cells and protein is specifically localized in the wall of the hair proper. The mRNA is cell-to-cell mobile.	protein_coding	LEUCINE-RICH REPEAT/EXTENSIN 1 (LRX1)	LEUCINE-RICH REPEAT/EXTENSIN 1 (LRX1)	LRX1					Cell wall.cell wall proteins.hydroxyproline-rich glycoproteins.extensins (EXTs).glycoproteins.LRR-domain extensin	-1.56196	0.0122945		0.917695		0.906957	-1.32695	0.0108761
AT2G22100	RNA-binding (RRM/RBD/RNP motifs) family protein	protein_coding								not assigned.annotated	-1.56117	0.00619898		0.674395		0.273724	-1.04429	0.00907901																												0.293359
AT3G57320	threonine-tRNA ligase 2	protein_coding							0.748181	not assigned.not annotated		0.384542	-1.23446	0.00398396		0.937455		0.129725																						-0.113211		0.886789		0.939879		-0.060121
AT5G57560	Encodes a cell wall-modifying enzyme, rapidly upregulated in response to environmental stimuli.	protein_coding	TOUCH 4 (TCH4)	XYLOGLUCAN ENDOTRANSGLUCOSYLASE/HYDROLASE 22 (XTH22);TOUCH 4 (TCH4); (ATXTH22)	TCH4				0.861892	Enzyme classification.EC_2 transferases.EC_2.4 glycosyltransferase		0.363642	-1.23089	5.17225e-09	-1.00611	4.14265e-06	0.491027	0.036728	3.63156	3.63327																				0.267347		-0.285672		-0.263034		0.289985
AT3G62680	Proline-rich protein The mRNA is cell-to-cell mobile.	protein_coding	PROLINE-RICH PROTEIN 3 (PRP3)	ARABIDOPSIS THALIANA PROLINE-RICH PROTEIN 3 (ATPRP3);PROLINE-RICH PROTEIN 3 (PRP3)	PRP3					Cell wall.cell wall proteins.hydroxyproline-rich glycoproteins.proline-rich proteins (PRPs).glycoprotein	-1.55712	0.0100675		0.678522		0.898088	-1.40034	0.00530775																							1.40259	1.40259
AT4G31700	Encodes a putative ribosomal protein S6 (rps6a). RPS6A and RPS6B are fully redundant and essential during gametogenesis.	protein_coding	RIBOSOMAL PROTEIN S6 (RPS6)	RIBOSOMAL PROTEIN S6 (RPS6); (ATRPS6); (RPS6A)	RPS6	eS6a				Protein biosynthesis.cytosolic ribosome.small subunit (SSU).SSU proteome.RPS6 component	-1.55684	9.09698e-15		0.076743	0.752325	0.00129546	-1.24488	3.55875e-10	-1.22806	-1.80615	-0.03	0.46	0.07	0.0042	0.02	0.078	-0.08	0.029												-0.22404		-0.517399		-0.251539		0.0418202
AT2G17240	arginine/serine-rich-like splicing factor	protein_coding								not assigned.not annotated	-1.55476	1.51151e-15	-0.424999	0.0367566		0.641862	-1.2957	1.52231e-14		-1.38286	0.16	0.27	0.04	1	-0.03	0.79	0.09	0.71												-0.194816		0.185032		0.14066		-0.239188
AT2G18900	Transducin/WD40 repeat-like superfamily protein	protein_coding								not assigned.not annotated	-1.54856	0.000132867	0.980453	0.00920251		0.131493	-1.76936	3.62301e-08	-1.61416																						-1.22542	-1.22542				0.4975
AT3G44260	Encodes one of the homologs of the yeast CCR4-associated factor 1: AT3G44260 (CAF1a), AT5G22250 (CAF1b). Has mRNA deadenylation activity. Also plays a role in plant defense responses.	protein_coding	CCR4- ASSOCIATED FACTOR 1A (CAF1a)	CCR4- ASSOCIATED FACTOR 1A (AtCAF1a);CCR4- ASSOCIATED FACTOR 1A (CAF1a)	CAF1a				1.12621	RNA processing.RNA decay.deadenylation-dependent mechanism.mRNA deadenylation.CCR4-NOT complex.CAF1 deadenylase component		0.984122	-1.22551	7.57852e-06	-0.808606	0.00640885		0.175135																						0.149514		-0.166819		-0.0767572		0.239575
AT1G63810	nucleolar protein	protein_coding								not assigned.not annotated	-1.54705	6.80323e-07		0.0987927		0.275662	-1.59171	7.69472e-11	-1.89488																							-0.38807				0.152003
AT5G61770	A single-copy gene encoding a 346 aa protein with a single Brix domain. Similar to yeast ribosome biogenesis proteins Ssf1/2.	protein_coding	PETER PAN-LIKE PROTEIN (PPAN)	(SNAIL1);PETER PAN-LIKE PROTEIN (PPAN)	PPAN					not assigned.annotated	-1.54457	5.3997e-05		0.279855		0.174553	-1.3261	1.81026e-05	-1.65754																							-0.613532				0.269033
AT3G15760	cytochrome P450 family protein	protein_coding							1.02823	not assigned.not annotated		0.247851	-1.22078	0.0033081		0.0600456	0.987864	0.0101266	1.50441																					0.288626		-0.68001		-0.856743		0.111893
AT2G34260	Encodes a WDxR motif-containing protein that is required for gametogenesis, seed and endosperm development.	protein_coding	HUMAN WDR55 (WD40 REPEAT) HOMOLOG (WDR55)	HUMAN WDR55 (WD40 REPEAT) HOMOLOG (WDR55)	WD40 REPEAT					not assigned.annotated	-1.54152	0.00639051		0.251627		0.0626818	-0.985576	0.0171651	-2.61976																											0.0645403
AT1G11530	Encodes a monocysteinic thioredoxin, thioredoxin in which the second cysteine of the redox site is replaced by a serine, with low disulfide reductase but efficient disulfide isomerase activity. The mRNA is cell-to-cell mobile.	protein_coding	C-TERMINAL CYSTEINE RESIDUE IS CHANGED TO A SERINE 1 (CXXS1)	C-TERMINAL CYSTEINE RESIDUE IS CHANGED TO A SERINE 1 (CXXS1);C-TERMINAL CYSTEINE RESIDUE IS CHANGED TO A SERINE 1 (ATCXXS1)	CXXS1				0.797	Redox homeostasis.cytosol/mitochondrion/nucleus redox homeostasis.H-type thioredoxin		0.436672	-1.21311	0.00977005		0.378771	1.17663	0.00474357	1.43346																					0.186655		0.477434		-0.289896		-0.580675
AT5G58120	Disease resistance protein (TIR-NBS-LRR class) family	protein_coding							2.13986	External stimuli response.biotic stress.pathogen effector.NLR effector receptor		0.881266	-1.20292	4.65671e-05	-1.29332	1.06755e-05		0.98039		1.24463																				-0.0478285				-0.0327899
AT4G00150	Belongs to one of the LOM (LOST MERISTEMS) genes: AT2G45160 (LOM1), AT3G60630 (LOM2) and AT4G00150 (LOM3). LOM1 and LOM2 promote cell differentiation at the periphery of shoot meristems and help to maintain their polar organization.	protein_coding	HAIRY MERISTEM 3 (HAM3)	(SCL6-IV);LOST MERISTEMS 3 (LOM3);ARABIDOPSIS THALIANA HAIRY MERISTEM 3 (ATHAM3);HAIRY MERISTEM 3 (HAM3)	HAM3				0.983723	RNA biosynthesis.transcriptional activation.GRAS transcription factor		0.910956	-1.20073	0.00118032	-1.58942	1.45613e-05		0.295725																						0.0489096		0.55141	1.81421	1.81421	1.31171	1.31171
AT5G13510	Ribosomal protein L10 family protein	protein_coding	EMBRYO DEFECTIVE 3136 (EMB3136)	EMBRYO DEFECTIVE 3136 (EMB3136)	EMB3136			uL10c	2.06009	Protein biosynthesis.organelle translation machineries.plastidial ribosome.large subunit proteome.psRPL10 | mtRPL10 component		0.849721	-1.19967	3.14997e-07	-0.781602	0.0023492		0.235147		-1.47308	-0.09	0.47	0.1	0.5	0.1	0.3	-0.09	0.45												0.367209		0.6772		0.352932		0.0429405
AT5G03960	IQ-domain 12	protein_coding	IQ-DOMAIN 12 (IQD12)	IQ-DOMAIN 12 (IQD12)	IQD12					not assigned.not annotated	-1.52914	0.0429774		0.837438		0.725448	-2.13835	6.63983e-05
AT3G43430	RING/U-box superfamily protein	protein_coding							12.918	Protein degradation.peptide tagging.Ubiquitin (UBQ)-anchor addition (ubiquitylation).UBQ-ligase E3 activities.RING-domain E3 ligase activities.RING-H2-type E3 ligase		0.655096	-1.19059	0.0269126		0.715172	1.23927	0.00810762	1.41425	1.03999																			1.06301	1.06301				-0.0248747
AT4G10480	Nascent polypeptide-associated complex (NAC), alpha subunit family protein	protein_coding								Protein modification.protein folding and quality control.NAC ribosome-associated chaperone complex.alpha subunit	-1.52585	8.94254e-17		0.12773	0.743872	0.000386899	-1.11957	4.85513e-11	-1.40788	-1.36535	-0.03	0.77	0.1	0.026	0.06	0.076	-0.07	0.51												0.242201		-0.505736		-0.631613		0.116324
AT1G69310	Encodes WRKY57, a member of the WRKY Transcription Factor. Activation of WRKY57 confers drought tolerance.	protein_coding	WRKY DNA-BINDING PROTEIN 57 (WRKY57)	(AtWRKY57);WRKY DNA-BINDING PROTEIN 57 (WRKY57)	WRKY57				3.23228	RNA biosynthesis.transcriptional activation.WRKY transcription factor		0.97597	-1.18544	0.0226963		0.677122		0.0926365
AT5G09510	Ribosomal protein S19 family protein	protein_coding				uS19d				Protein biosynthesis.cytosolic ribosome.small subunit (SSU).SSU proteome.RPS15 component	-1.52305	2.56697e-17		0.898666		0.971718	-1.46725	8.26465e-20	-1.09513	-1.25496	-0.09	0.34	-0.01	0.72	0.05	0.72	-0.03	0.46												-0.136502		0.106199		0.0906983		-0.152003
AT3G13980	SKI/DACH domain protein	protein_coding	BIG GRAIN 4 (BG4)	BIG GRAIN 4 (BG4)	BG4				4.77143	not assigned.annotated		0.976361	-1.18482	0.0265872		0.0562502		0.849476
AT1G26770	Encodes an expansin. Naming convention from the Expansin Working Group (Kende et al, Plant Mol Bio). Involved in the formation of nematode-induced syncytia in roots of Arabidopsis thaliana.	protein_coding	EXPANSIN A10 (EXPA10)	EXPANSIN A10 (ATEXPA10);ARABIDOPSIS THALIANA EXPANSIN 10 (AT-EXP10);EXPANSIN A10 (EXPA10);ARABIDOPSIS THALIANA EXPANSIN ALPHA 1.1 (ATHEXP ALPHA 1.1);EXPANSIN 10 (EXP10);ARABIDOPSIS THALIANA EXPANSIN 10 (ATEXP10)	EXPA10					Cell wall.cell wall proteins.expansins.alpha-type expansin	-1.51469	2.44556e-05		0.193608	1.06641	0.00644896	-0.897515	0.000800154		-3.80979																						-0.0634254				-0.153805
AT3G07050	Arabidopsis NSN1 encodes a nucleolar GTP- binding protein and is required for maintenance of inflorescence meristem identity and floral organ development.	protein_coding	NUCLEOSTEMIN-LIKE 1 (NSN1)	NUCLEOSTEMIN-LIKE 1 (NSN1)	NSN1					Protein biosynthesis.cytosolic ribosome.large subunit (LSU).LSU processome component.NUG1/NSN1 regulatory GTPase	-1.51407	2.60446e-09	0.738562	0.0045171	0.709485	0.0202951	-1.54315	3.67949e-12	-1.8872		0.18	0.085	0.43	0	0.16	0.026	-0.1	0.15												-0.710493	-1.04654	-1.04654		-0.0868775		0.249172
AT5G56950	Encodes a member of a small gene family of proteins with similarity to nucleosome assembly proteins.May function in nucleotide excision repair. Loss of function mutations have no obvious visible phenotypes but do seem to affect transcription of NER related genes. Plants mutated in three ubiquitously expressed NAP1 genes (NAP1;1~NAP1;3) and organ-specifically expressed NAP1;4 gene show hypersensit…	protein_coding	NUCLEOSOME ASSEMBLY PROTEIN 1;3 (NAP1;3)	NUCLEOSOME/CHROMATIN ASSEMBLY FACTOR GROUP A 03 (NFA03);NUCLEOSOME/CHROMATIN ASSEMBLY FACTOR GROUP A3 (NFA3);NUCLEOSOME ASSEMBLY PROTEIN 1;3 (NAP1;3)	NAP1;3					Chromatin organisation.histone chaperone activities.NAP-type histone chaperone	-1.51189	2.28359e-13	0.7498	8.37501e-05	0.710068	0.0030822	-1.55162	1.13792e-20	-1.15093		-0.11	0.25	0.35	0.0007	0.4	0.001	-0.06	0.59												-0.304334		-0.734018		-0.323295		0.106389
AT4G28780	GDSL-motif esterase/acyltransferase/lipase. Enzyme group with broad substrate specificity that may catalyze acyltransfer or hydrolase reactions with lipid and non-lipid substrates.	protein_coding								Cell wall.cutin and suberin.cutin polyester synthesis.CD-type cutin synthase	-1.51128	1.59099e-12		0.0793895		0.116768	-1.54594	2.11779e-15		-2.60179	-0.32	0.0051	0.02	0.98	0.27	0.034	-0.06	0.64												0.39183		0.060121		0.137504		0.469213
AT4G29780	nuclease	protein_coding							1.19897	not assigned.annotated		0.857102	-1.17857	0.000914308	-0.867853	0.0269338		0.682508		1.57723																				0.0774788		-0.507484		0.121991		0.706953
AT4G38770	Encodes one of four proline-rich proteins in Arabidopsis which are predicted to localize to the cell wall. Transcripts are most abundant in aerial organs of the plant.	protein_coding	PROLINE-RICH PROTEIN 4 (PRP4)	ARABIDOPSIS THALIANA PROLINE-RICH PROTEIN 4 (ATPRP4);PROLINE-RICH PROTEIN 4 (PRP4)	PRP4				2.27027	not assigned.annotated		0.891293	-1.17851	4.29054e-09	-1.15747	1.43633e-08		0.931367		-1.93489																				0.234012	1.04467	1.04467		0.940946		0.130288
AT3G63420	heterotrimeric G protein gamma-subunit (AGG1) mRNA,	protein_coding	GGAMMA-SUBUNIT 1 (GG1)	GGAMMA-SUBUNIT 1 (AGG1); (ATAGG1);GGAMMA-SUBUNIT 1 (GG1)	GG1				0.854516	External stimuli response.biotic stress.pathogen-associated molecular pattern (PAMP).PTI (pattern-triggered immunity) network.bacterial elicitor response.non-canonical heterotrimeric G-protein complex.AGG1/2 G-gamma component		0.853353	-1.16703	0.00607647		0.95265	0.988834	0.0110093																					1.80735	1.80735
AT2G27330	RNA-binding (RRM/RBD/RNP motifs) family protein	protein_coding								not assigned.not annotated	-1.49663	0.0155384		0.089543		0.642624		0.885068																							1.60572	1.60572
AT5G64310	Encodes arabinogalactan-protein (AGP1). The mRNA is cell-to-cell mobile.	protein_coding	ARABINOGALACTAN PROTEIN 1 (AGP1)	(ATAGP1);ARABINOGALACTAN PROTEIN 1 (AGP1)	AGP1				0.377113	Cell wall.cell wall proteins.hydroxyproline-rich glycoproteins.arabinogalactan proteins (AGPs).glycoproteins.classical arabinogalactan protein		0.723773	-1.16169	0.00127546	-1.08144	0.00471638		0.826568																						0.323655	1.21807	1.21807	1.22338	1.22338		0.328967
AT5G60590	DHBP synthase RibB-like alpha/beta domain-containing protein	protein_coding								RNA processing.RNA modification.tRNA N6-threonylcarbamoylation.threonylcarbamoyl-AMP synthase	-1.49171	0.00987084		0.564362		0.321514	-1.11304	0.00653679																								-0.325095				-0.0401891
AT1G15420	Encodes a novel plant specific protein that is co-expressed with components of pre-rRNA processing complex. Co-localizes with NuGWD1 and SWA1.	protein_coding	LANT-SPECIFIC COMPONENT OF THE PRE- RRNA PROCESSING COMPLEX1 (PCP1)	LANT-SPECIFIC COMPONENT OF THE PRE- RRNA PROCESSING COMPLEX1 (PCP1)	PCP1					not assigned.not annotated	-1.48808	0.000694456		0.0791046	0.975647	0.0498861	-1.22578	0.000234121			0.01	1	0.38	0.1	0.24	0.47	-0.13	0.46												-0.601082		-0.476903		0.0634254		-0.060754
AT1G50740	Transmembrane proteins 14C	protein_coding							0.831312	Solute transport.carrier-mediated transport.FAX fatty acid transporter		0.653699	-1.16127	0.0138091		0.805187	1.64449	3.43121e-05		0.407148																				0.704872		0.632268		-0.0313155		0.0412882
AT5G61790	calnexin 1	protein_coding	CALNEXIN 1 (CNX1)	(ATCNX1);CALNEXIN 1 (CNX1)	CNX1					Protein modification.protein folding and quality control.N-glycan-dependent machinery.CNX-CRT cycle.CNX lectin chaperone	-1.48698	2.98313e-10	0.864143	0.000627622	0.79417	0.00384491	-1.55696	3.11424e-12	-2.01693	-1.92845	0.11	0.28	0.58	0	0.55	0	0.07	0.097												0.0345572		-0.736966		-0.530515		0.241008
AT3G26510	Octicosapeptide/Phox/Bem1p family protein	protein_coding							1.51053	not assigned.not annotated		0.257751	-1.15433	0.0126526	-1.51562	0.000353722		0.69723	2.43135	0.343029																				0.932886		0.758661		0.499804		0.674029
AT5G19230	Glycoprotein membrane precursor GPI-anchored	protein_coding							0.625268	not assigned.annotated		0.647368	-1.14462	0.0038405		0.497788		0.262671		1.94539																				0.825971		0.822604		-0.213452		-0.210086
AT5G35100	Cyclophilin-like peptidyl-prolyl cis-trans isomerase family protein	protein_coding							0.833919	Protein modification.protein folding and quality control.protein folding catalyst activities.Cyclophilin protein folding catalyst	0.536062	0.0440741	-1.13598	2.32557e-06	-0.906658	0.000106463	0.765383	0.00108831			0.14	0.69	-0.15	0.41	-0.46	0.15	-0.17	0.2												0.234234		0.295798		0.292541		0.230977
AT3G20240	Mitochondrial substrate carrier family protein	protein_coding								Solute transport.carrier-mediated transport.MC-type solute transporter	-1.48261	0.00954544		0.492166		0.549057	-1.37457	0.000258671	-1.46126																							-0.049753				3.20343e-16
AT3G59980	Nucleic acid-binding, OB-fold-like protein	protein_coding								not assigned.annotated	-1.47955	1.96695e-09		0.0839622		0.902614	-0.976611	2.70617e-06		-1.81754	-0.09	0.61	-0.02	0.76	0.01	0.58	-0.06	0.31												-0.227806		-0.431339		-0.479743		-0.27621
AT1G54780	Encodes a thylakoid lumen protein regulating photosystem II repair cycle. Has acid phosphatase activity. The mRNA is cell-to-cell mobile.	protein_coding	THYLAKOID LUMEN PROTEIN 18.3 (TLP18.3)	THYLAKOID LUMEN PROTEIN 18.3 (TLP18.3); (ATTLP18.3)	TLP18.3				1.29436	Photosynthesis.photophosphorylation.photosystem II.assembly and maintenance.Psb32 protein		0.110363	-1.12121	1.7813e-07	-0.767767	0.000822724	0.768051	0.000376241			0.24	0.031	0.12	0.27	-0.09	0.25	0.03	0.96												0.190462		0.381194		-0.0893758		-0.280108
AT5G16370	acyl activating enzyme 5	protein_coding	ACYL ACTIVATING ENZYME 5 (AAE5)	ACYL ACTIVATING ENZYME 5 (AAE5)	AAE5				0.855858	not assigned.annotated	0.572012	0.0170822	-1.11701	3.14778e-07	-1.0886	3.9912e-07	0.60042	0.0082471		2.35011	-0.15	0.37	0.25	0.53	0.44	0.025	0.05	0.4												0.374124		-0.203533		-0.179108		0.398549
AT2G39390	Ribosomal L29 family protein	protein_coding				uL29b				Protein biosynthesis.cytosolic ribosome.large subunit (LSU).LSU proteome component.RPL35 component	-1.47067	1.07484e-11		0.961794	0.698589	0.00601866	-0.791335	7.63627e-05		-1.29237	-0.31	0.52	0.34	0.86	0.32	0.72	-0.33	0.92												-0.345775		-0.14066		-0.142019		-0.347133
AT1G68840	Rav2 is part of a complex that has been named `regulator of the (H+)-ATPase of the vacuolar and endosomal membranes' (RAVE) The mRNA is cell-to-cell mobile.	protein_coding	RELATED TO ABI3/VP1 2 (RAV2)	RELATED TO ABI3/VP1 2 (RAV2);RELATED TO AP2 8 (rap2.8);TEMPRANILLO 2 (TEM2);ETHYLENE RESPONSE DNA BINDING FACTOR 2 (EDF2); (AtRAV2)	RAV2				1.89177	RNA biosynthesis.transcriptional activation.AP2/ERF superfamily.RAV-type transcription factor	0.696255	0.00218082	-1.11311	2.35024e-07	-1.03502	1.75111e-06	0.774341	0.000339234		2.82928																				0.114712		-0.060968		0.0182622		0.193942
AT1G78260	RNA-binding (RRM/RBD/RNP motifs) family protein	protein_coding							2.31424	not assigned.annotated		0.517863	-1.11157	0.00358325	-1.13534	0.00525288		0.434446																						0.955606	1.08489	1.08489		0.778077		0.648794
AT2G20450	Ribosomal protein L14	protein_coding				eL14a				Protein biosynthesis.cytosolic ribosome.large subunit (LSU).LSU proteome component.RPL14 component	-1.46844	1.71904e-10		0.233964	0.801249	0.00220298	-0.982447	5.99812e-07	-1.34345	-1.6809	-0.16	0.31	0.32	0.012	0.49	0.0036	0.01	0.35												0.0439433		-0.0300572		-0.535332		-0.461331
AT1G72370	acidic protein associated to 40S ribosomal subunit of ribosomes. Involved in polysome formation during active protein synthesis. Expressed in actively growing tissue.	protein_coding	40S RIBOSOMAL PROTEIN SA (P40)	40S RIBOSOMAL PROTEIN SA (P40); (RPSAA); (RP40); (AP40)	P40	uS2a				Protein biosynthesis.cytosolic ribosome.small subunit (SSU).SSU proteome.RPSa component	-1.46721	1.83289e-18	0.512041	0.00793084	0.513852	0.0129921	-1.4654	9.20069e-20		-1.48398	-0.17	0.003	0.11	0.87	0.18	0.08	-0.09	0.069												-0.275634		-0.485427		-0.0552824		0.15451
AT4G18280	glycine-rich cell wall protein-like protein	protein_coding							2.22238	not assigned.not annotated		0.446596	-1.10843	0.0287458		0.0929536		0.146735																						-0.377235				0.628519
AT1G49500	transcription initiation factor TFIID subunit 1b-like protein	protein_coding							0.504157	not assigned.not annotated		0.895346	-1.10527	0.00400148		0.10598		0.54016	1.07293																					0.443348		0.518965		-0.434578		-0.510195
AT3G01820	P-loop containing nucleoside triphosphate hydrolases superfamily protein	protein_coding								Nucleotide metabolism.purines.phosphotransfers.adenylate kinase	-1.46153	4.64399e-05		0.13017		0.166937	-1.56036	4.87568e-07																						-0.294743		0.395301		0.407806		-0.282239
AT1G64230	ubiquitin-conjugating enzyme 28	protein_coding	UBIQUITIN-CONJUGATING ENZYME 28 (UBC28)	UBIQUITIN-CONJUGATING ENZYME 28 (UBC28)	UBC28				2.43831	Protein degradation.peptide tagging.Membrane-anchored-Ubiquitin (MUB)-anchor addition.UBC-subclass-6 conjugation E2 protein		0.773143	-1.1042	1.13242e-05	-0.843555	0.00168419		0.196525	1.43142		-0.06	0.63	0.04	0.86	0.13	0.2	0.03	0.75												-0.146389	1.08	1.08		0.447926		-0.778463
AT5G56550	Encodes OXIDATIVE STRESS 3 (OXS3)&#65292; involved in tolerance to heavy metals and oxidative stress.	protein_coding	OXIDATIVE STRESS 3 (OXS3)	OXIDATIVE STRESS 3 (ATOXS3);OXIDATIVE STRESS 3 (OXS3)	OXS3				2.32108	not assigned.not annotated		0.268548	-1.10097	0.0103502		0.16963	0.985817	0.0150756		1.83504																				0.284453		-0.0565835		0.0521962		0.393233
AT2G25210	Ribosomal protein L39 family protein	protein_coding				eL39a				Protein biosynthesis.cytosolic ribosome.large subunit (LSU).LSU proteome component.RPL39 component	-1.45849	6.47894e-12		0.13412	0.552873	0.03713	-0.543691	0.00850314		-1.46098																				-0.516015		0.673019		0.189034		-1
AT3G50640	hypothetical protein	protein_coding								not assigned.not annotated	-1.45712	0.00687976		0.667143		0.692635		0.0672759																								0.0108883				0.332735
AT3G17350	wall-associated receptor kinase carboxy-terminal protein	protein_coding							0.325103	not assigned.not annotated		0.0717029	-1.09348	0.0288619		0.892424		0.892416		-2.17298
AT2G37990	ribosome biogenesis regulatory protein (RRS1) family protein	protein_coding	ARABIDOPSIS HOMOLOG OF YEAST RRS1 (ARRS1)	ARABIDOPSIS HOMOLOG OF YEAST RRS1 (ARRS1)	ARRS1					not assigned.annotated	-1.44736	7.66486e-07		0.149153	0.731997	0.0360954	-1.15614	9.02131e-07	-1.75729		0.15	0.16	0.33	0.00013	0.11	0.38	-0.08	0.38												-0.197939		-0.63005		-0.520648		-0.0885367
[truncated: 32,837 more rows]
