# Supplementary material for: Parallel global profiling of plant TOR dynamics reveals a conserved role for LARP1 in translation
Source: eLife. 2020 Oct 15;9:e58795. doi: 10.7554/eLife.58795 (PMC7584452; doi:10.7554/eLife.58795)
Supplement: Supplementary file 2. — Table presents the fold-change of mRNA levels of the genes from the different categories, as determined by Mapman analysis. These data are represented as box-whisker plots in Figure 1B and Figure 1C. [file elife-58795-supp2.xlsx]

## Sheet: Cytosolic RPs
Locus Identifier	Gene Model Description	log2 (WT+T2 / WT mock) mRNA levels
AT1G56045	Ribosomal protein L41 family	-1.14265
AT2G25210	Ribosomal protein L39 family protein	-1.45849
AT3G59540	Ribosomal L38e protein family	-1.17239
AT2G32220	Ribosomal L27e protein family	-2.73281
AT4G33865	Ribosomal protein S14p/S29e family protein	-0.732491
AT2G43460	Ribosomal L38e protein family	-0.490523
AT2G19740	Ribosomal protein L31e family protein	-0.714026
AT3G02190	Ribosomal protein L39 family protein	-1.29711
AT5G56670	Ribosomal protein S30 family protein	-1.33129
AT1G63980	D111/G-patch domain-containing protein	-0.708736
AT1G77940	Ribosomal protein L7Ae/L30e/S12e/Gadd45 family protein	-1.17772
AT3G44010	Ribosomal protein S14p/S29e family protein	-1.36212
AT4G31985	Ribosomal protein L39 family protein	-0.853703
AT3G04400	Ribosomal protein L14p/L23e family protein	-0.776364
AT1G15930	Ribosomal protein L7Ae/L30e/S12e/Gadd45 family protein	-1.02499
AT5G64140	Encodes a putative ribosomal protein S28.	-1.57844
AT3G13230	RNA-binding KH domain-containing protein	-2.46951
AT5G02450	Ribosomal protein L36e family protein	-0.694849
AT1G74270	Ribosomal protein L35Ae family protein	-1.14859
AT5G56710	Ribosomal protein L31e family protein	-1.43054
AT1G04480	Ribosomal protein L14p/L23e family protein	-1.24276
AT1G26880	Ribosomal protein L34e superfamily protein	-1.3078
AT5G02610	Ribosomal L29 family protein	-1.76728
AT5G27700	Cytosolic ribosomal protein. Similar to EVR1 and redundant with EVR1. Also enhances VAR2 mutant varigation, but to a lesser extent than evr1.	-0.862396
AT3G18740	The gene encodes a putative leucine-rich repeat (LRR)Receptor-like kinase (RLK).	-1.1453
AT4G26230	Ribosomal protein L31e family protein	-1.50213
AT3G45030	Ribosomal protein S10p/S20e family protein	-1.11859
AT2G45710	Zinc-binding ribosomal protein family protein	-2.05102
AT3G05560	Ribosomal L22e protein family	-1.29882
AT5G62300	Ribosomal protein S10p/S20e family protein	-0.623416
AT3G06680	Ribosomal L29e protein family	-0.600252
AT1G52300	Zinc-binding ribosomal protein family protein	-0.826193
AT2G37600	Ribosomal protein L36e family protein	-1.22078
AT3G44590	60S acidic ribosomal protein family	-1.79822
AT3G14600	Ribosomal protein L18ae/LX family protein	-0.757256
AT2G44860	Ribosomal protein L24e family protein	-1.64958
AT5G47930	Zinc-binding ribosomal protein family protein	-1.32468
AT1G69620	putative 60S ribosomal protein L34 The mRNA is cell-to-cell mobile.	-0.599413
AT2G34480	Encodes a nuclear localized member of the ribosomal L18ae/LX protein family. Loss of function mutations show reduced transmission through the gametophytes and embryo lethality.	-1.36066
AT3G62250	ubiquitin 5	-0.946625
AT3G47370	Ribosomal protein S10p/S20e family protein	-1.82654
AT5G27850	Ribosomal protein L18e/L15 superfamily protein	-1.23719
AT3G60360	embryo sac development arrest 14	-1.42024
AT2G36620	RPL24A encodes ribosomal protein L24, homolog of cytosolic RPL24, found in archaea and higher eukaryotes. Arabidopsis has two RPL24 homologs, RPL24A (AT2G36620) and RPL24B (AT3G53020).	-1.17291
AT3G15460	Encodes one of two Arabidopsis orthologs of yeast BRX1, a protein involved in maturation of the large ribosomal subunit. The proteins are mainly localized in nucleolus. Mutant plants are affected in pre-rRNA processing.	-1.08884
AT3G22230	Ribosomal L27e protein family	-1.19548
AT5G02960	Ribosomal protein S12/S23 family protein	-1.40783
AT3G58700	Ribosomal L5P family protein	-1.32458
AT3G23390	Zinc-binding ribosomal protein family protein	-0.845567
AT2G33370	Ribosomal protein L14p/L23e family protein	-0.758478
AT3G07110	Ribosomal protein L13 family protein	-1.77716
AT3G04920	Ribosomal protein S24e family protein	-0.940327
AT2G20450	Ribosomal protein L14	-1.46844
AT4G00100	Encodes a cytoplasmic ribosomal protein S13 homologue involved in early leaf development The mRNA is cell-to-cell mobile.	-1.07852
AT3G61110	Arabidopsis ribosomal protein	-0.416313
AT4G14320	Zinc-binding ribosomal protein family protein	-0.728076
AT1G08360	Ribosomal protein L1p/L10e family	-0.963482
AT1G07770	Encodes cytoplasmic ribosomal protein S15a.	-0.921553
AT3G62870	Ribosomal protein L7Ae/L30e/S12e/Gadd45 family protein	-1.24794
AT3G05590	Encodes cytoplasmic ribosomal protein L18.	-1.0303
AT3G53890	Cytosolic ribosomal protein. Mutants enhance the varigation effect of var2 mutations suggesting a link between cytosolic translation and chloroplast development.	-0.921012
AT4G25890	60S acidic ribosomal protein family	-1.29263
AT1G27400	Ribosomal protein L22p/L17e family protein	-0.892577
AT5G27770	Ribosomal L22e protein family	-1.02769
AT2G39460	Encodes a 60S ribosomal protein L23aA (AtrpL23aA). Paralog of RLPL23aB.	-1.28336
AT3G52590	Ubiquitin extension protein The mRNA is cell-to-cell mobile.	-0.394228
AT3G28900	Ribosomal protein L34e superfamily protein	-1.96472
AT4G18730	encodes a cytosolic ribosomal protein L16, which is a constituent of 60S large ribosomal complex. Gene is expressed in root and shoot apical meristems and in lateral root primordia. Expression in lateral root primordia is induced by auxin.	-1.20474
AT5G04800	Ribosomal S17 family protein	-1.02766
AT5G22440	Ribosomal protein L1p/L10e family	-1.25006
AT2G19750	Ribosomal protein S30 family protein	-1.2071
AT4G29410	Ribosomal L28e protein family	-1.12922
AT3G09500	Ribosomal L29 family protein	-0.822142
AT3G02080	Ribosomal protein S19e family protein	-0.706112
AT1G22780	S18 ribosomal protein involved in the binding of f-Met tRNA during initiation of mRNA translation. Expression restricted to meristems. Mutant phenotype-pointed first leaves,reduced fresh weight, growth retardation.	-1.08011
AT1G15250	Zinc-binding ribosomal protein family protein	-0.777271
AT2G27710	60S acidic ribosomal protein family	-1.33451
AT2G39390	Ribosomal L29 family protein	-1.47067
AT2G47110	polyubiquitin gene The mRNA is cell-to-cell mobile.	-0.855526
AT4G18100	Ribosomal protein L32e	-1.35604
AT1G63780	Small nucleolar ribonucleoprotein protein involved in ribosomal RNA processing. Located in nucleolus and cajal bodies.	-1.22766
AT3G53740	Ribosomal protein L36e family protein	-1.21333
AT2G19730	Ribosomal L28e protein family	-0.929274
AT4G02230	Ribosomal protein L19e family protein	-0.59111
AT1G16280	Encodes a putative DEAD-box RNA helicase. Essential for female gametogenesis.	-1.41139
AT2G37270	One of two genes encoding the ribosomal protein S5. Expressed at a lower level compared to ATRPS5A.	-1.42726
AT2G32060	Ribosomal protein L7Ae/L30e/S12e/Gadd45 family protein	-1.406
AT5G16130	Ribosomal protein S7e family protein	-1.3121
AT3G49010	Encodes 60S ribosomal protein L13. Homolog of human breast basic conserved 1 (BBC1).	-1.40746
AT1G67430	Ribosomal protein L22p/L17e family protein	-1.1143
AT3G55280	60S ribosomal protein L23A (RPL23aB). Paralog of RPL23aA	-1.29119
AT4G29430	ribosomal protein S15A E	-0.955787
AT3G46040	Regulated by TCP20. The mRNA is cell-to-cell mobile.	-0.62748
AT2G27530	Encodes ribosomal protein L10aP. Identified in a screen for enhancers of as1. as1/pgy double mutants show defects in leaf vascular patterning and adaxial cell fate. Double mutant analysis indicates pgy genes function in the same pathway as REV, KAN1 and KAN2.	-1.34237
AT3G06700	Ribosomal L29e protein family	-1.11085
AT4G09800	encodes a ribosomal protein S18C, a constituent of the small subunit of the ribosomal complex	-0.3588
AT1G09690	Translation protein SH3-like family protein	-0.615505
AT5G61170	Ribosomal protein S19e family protein	-1.71057
AT3G52580	Ribosomal protein S11 family protein	-0.970225
AT4G13170	Ribosomal protein L13 family protein	-1.2773
AT5G41520	The gene belongs to the three-member Arabidopsis gene family encoding the eukaryote-specific protein S10e of the small cytoplasmic ribosomal subunit.	-0.696617
AT5G15520	Ribosomal protein S19e family protein	-1.00181
AT3G60245	Zinc-binding ribosomal protein family protein	-1.24368
AT3G10610	Ribosomal S17 family protein	-0.883479
AT1G29970	60S ribosomal protein L18A-1	0.652192
AT5G59850	Ribosomal protein S8 family protein	-1.88572
AT1G04270	Encodes cytosolic ribosomal protein S15.	-0.807886
AT2G17250	Encodes a nucleolar protein that is a ribosome biogenesis co-factor. Mutants display aberrant RNA processing and homozygous embryos arrest in the globular stage of development.	-1.83561
AT5G35530	Ribosomal protein S3 family protein	-0.735956
AT5G46430	Ribosomal protein L32e	-0.556091
AT5G67510	Translation protein SH3-like family protein	-1.33952
AT2G01250	Cytosolic ribosomal 60S subunit protein.	-0.767248
AT1G14320	Encodes a ribosomal protein L10 and may be involved in translation regulation. Semi-dominant mutations in SAC552 can suppress defects in acaulis5, which encodes a thermospermine synthase, by enhancing translation of acl5 and itself.	-1.04661
AT1G48830	Ribosomal protein S7e family protein	-0.544321
AT3G60770	Ribosomal protein S13/S15	-1.304
AT1G70600	Ribosomal protein L18e/L15 superfamily protein	-1.88651
AT3G48930	Nucleic acid-binding, OB-fold-like protein	-1.10519
AT3G16080	Zinc-binding ribosomal protein family protein	-1.70962
AT1G80750	Cytosolic ribosomal 60S subunit protein.	-1.84014
AT5G48760	Ribosomal protein L13 family protein	-1.01266
AT4G36130	Ribosomal protein L2 family	-1.2918
AT2G47610	Ribosomal protein L7Ae/L30e/S12e/Gadd45 family protein	-1.09659
AT5G45775	Ribosomal L5P family protein	-1.24482
AT4G15000	Ribosomal L27e protein family	-1.26468
AT4G39200	Ribosomal protein S25 family protein	-0.437532
AT2G44120	Ribosomal protein L30/L7 family protein	-1.23235
AT5G28060	Ribosomal protein S24e family protein	-0.998271
AT5G23740	Encodes a putative ribosomal protein S11 (RPS11-beta).	-1.56343
AT1G43860	sequence-specific DNA binding transcription factor	-1.23805
AT4G27090	Ribosomal protein L14	-0.658134
AT2G24500	Encodes a C2H2 zinc finger protein FZF.	-1.44557
AT1G34030	Ribosomal protein S13/S18 family	-1.77542
AT5G20290	Ribosomal protein S8e family protein	-1.05153
AT5G09510	Ribosomal protein S19 family protein	-1.52305
AT5G10360	RPS6A and RPS6B are fully redundant and essential during gametogenesis.	-1.10778
AT1G33120	Ribosomal protein L6 family	-1.29338
AT3G53020	RPL24B encodes ribosomal protein L24, homolog of cytosolic RPL24, found in archaea and higher eukaryotes. Arabidopsis has two RPL24 homologs, RPL24A (AT2G36620) and RPL24B. Mutants showed defects in apical-basal gynoecium patterning similar to previously described ett and mp mutants. Transformation of stv1-1 mutant with a uORF-eliminated ETT construct partially suppressed the stv1 gynoecium pheno…	-0.941615
AT2G37190	Ribosomal protein L11 family protein	-1.35983
AT1G74050	Ribosomal protein L6 family protein	-0.99934
AT3G16780	Ribosomal protein L19e family protein	-1.6981
AT4G34670	Ribosomal protein S3Ae	-1.0656
AT2G36160	Ribosomal protein S11 family protein	-0.721856
AT4G07410	Encodes a WD-40 protein expressed both during embryo development and postembryonically in the SAM and RAM that functions in the auxin pathway, integrating auxin signaling in the organization and maintenance of the SAM and RAM.	-0.776575
AT2G42740	encodes a cytosolic ribosomal protein L16, which is a constituent of 60S large ribosomal complex. Gene is expressed in root stele and anthers and expression is induced by auxin treatment.	-1.28207
AT3G04840	Ribosomal protein S3Ae	-1.15588
AT2G21580	Ribosomal protein S25 family protein	-1.4064
AT3G49910	Translation protein SH3-like family protein	-1.25936
AT4G10450	Ribosomal protein L6 family	-1.22625
AT1G50920	Putative GTPase involved in HA - and ABA-mediated signaling pathways, particularly during defense respnses to pathogens. Has paralog NOG1-2.	-1.44627
AT5G03850	Nucleic acid-binding, OB-fold-like protein	-0.507346
AT1G09590	Translation protein SH3-like family protein	-1.16158
AT5G07090	Ribosomal protein S4 (RPS4A) family protein	-0.810333
AT3G02560	Ribosomal protein S7e family protein	-0.960262
AT5G18380	Ribosomal protein S5 domain 2-like superfamily protein	-0.900099
AT2G03820	Encodes a protein involved in the nuclear export of the 60S ribosomal subunit and formation of the secondary cell wall.	-1.33796
AT5G52820	Encodes a NOTCHLESS homolog, a non-ribosomal protein involved in the maturation and assembly of the 60S ribosomal subunit, that is required for female gametogenesis. The mRNA is cell-to-cell mobile.	-0.893716
AT3G11940	One of two genes encoding the ribosomal protein S5. Mutants have semi-dominant developmental phenotypes. Most cell-division processes are delayed or disturbed in the heterozygous mutant, and development is completely arrested at an early embryonic stage in the homozygous mutant.	-0.537381
AT5G14520	Encodes a nucleolar protein that plays an essential role in cell growth and survival through its regulation of ribosome biogenesis and mitotic progression.	-1.38877
AT1G31660	Encodes a protein that is a ribosome biogenesis co-factor. Mutants display aberrant RNA processing and male and female gametophyte development.	-1.86566
AT5G06360	Ribosomal protein S8e family protein	-0.846479
AT1G07070	Ribosomal protein L35Ae family protein	-1.16714
AT1G74060	Ribosomal protein L6 family protein	-0.55425
AT3G53430	Ribosomal protein L11 family protein	-1.21693
AT4G16720	Ribosomal protein L23/L15e family protein	-1.23538
AT3G56340	Small ribosomal subunit protein.	-1.38015
AT3G25520	Encodes ribosomal protein L5 that binds to 5S ribosomal RNA and in involved in its export from the nucleus to the cytoplasm. Identified in a screen for enhancers of as1. as1/pgy double mutants show defects in leaf vascular patterning and adaxial cell fate. Double mutant analysis indicates pgy genes function in the same pathway as REV, KAN1 and KAN2.	-1.55727
AT5G60670	Ribosomal protein L11 family protein	-1.56842
AT3G12270	protein arginine methyltransferase 3	-1.10036
AT2G36170	60S ribosomal protein L40-1	-1.075
AT3G11510	Ribosomal protein S11 family protein	-1.24798
AT2G31610	Ribosomal protein S3 family protein	-1.24176
AT1G18540	Ribosomal protein L6 family protein	-0.67241
AT4G17390	Ribosomal protein L23/L15e family protein	-1.29586
AT4G28450	This gene is predicted to encode a protein with a DWD motif. It can bind to DDB1a in Y2H assays and may be involved in the formation of a CUL4-based E3 ubiquitin ligase	-1.52247
AT2G17360	Ribosomal protein S4 (RPS4A) family protein	-0.807438
AT5G39740	Encodes a ribosomal protein RPL5B that is involved in ribosome biogenesis and plays a role in organ size control by promoting cell proliferation and preventing compensation in normal leaf development.	-1.19638
AT3G04770	40s ribosomal protein SA B	-2.02356
AT4G31700	Encodes a putative ribosomal protein S6 (rps6a). RPS6A and RPS6B are fully redundant and essential during gametogenesis.	-1.55684
AT4G25740	RNA binding Plectin/S10 domain-containing protein	-0.971732
AT5G57290	60S acidic ribosomal protein family	-0.945203
AT1G27470	transducin family protein / WD-40 repeat family protein	-2.13162
AT2G40360	Encodes BOP1, an ortholog of Block of cell proliferation (BOP) protein. A T-DNA null allele of the BOP1 gene is lethal, and a 50% decrease in transcript accumulation is sufficient to cause severe developmental defects linked to defective cell division.	-1.33638
AT5G66540	U3 small nucleolar ribonucleoprotein	-1.89225
AT1G52930	Encodes one of two Arabidopsis orthologs of yeast BRX1, a protein involved in maturation of the large ribosomal subunit. The proteins are mainly localized in nucleolus. Mutant plants are affected in pre-rRNA processing.	-1.46982
AT4G02400	U3 ribonucleoprotein (Utp) family protein	-1.2495
AT3G24830	Ribosomal protein L13 family protein	-0.805854
AT3G09200	Ribosomal protein L10 family protein	-1.29234
AT3G53870	Ribosomal protein S3 family protein	-0.491805
AT1G52980	Encodes a GTPase that belongs to the subfamily of YlqF/YawG GTPases. Functions in Pre-60S ribosomal subunit maturation. The mRNA is cell-to-cell mobile.	-0.854699
AT1G02780	Ribosomal protein L19e family protein	-0.761764
AT4G05410	Encodes a nucleolar protein with seven WD40-repeats that plays a role in embryo sac development and is critical for the correct positioning of the division plane of zygote and the apical cell lineage in Arabidopsis. YAO may act by modulating nucleolar function, such as rRNA biogenesis, during early embryogenesis and gametogenesis.	-1.92707
AT5G58420	Ribosomal protein S4 (RPS4A) family protein	-1.20321
AT4G26600	S-adenosyl-L-methionine-dependent methyltransferases superfamily protein	-1.53462
AT1G72370	acidic protein associated to 40S ribosomal subunit of ribosomes. Involved in polysome formation during active protein synthesis. Expressed in actively growing tissue.	-1.46721
AT4G00810	Co-orthologous gene of large ribosomal subunit protein RPP1.	-0.716969
AT1G48630	Encodes a protein with similarity to mammalian RACKs. RACKs function to shuttle activated protein kinase C to different subcellular sites and may also function as a scaffold through physical interactions with other proteins. RACK1B has no phenotype on its own and probably acts redundantly with RACK1A and RACK1C.	-2.1978
AT3G11250	Ribosomal protein L10 family protein	-0.779518
AT2G41840	Ribosomal protein S5 family protein	-1.2361
AT5G41190	Encodes a cytoplasmic protein with RNA endonuclease activity. Mutants display aberrant RNA processing and male and female gametophyte development.	-0.96924
AT3G07050	Arabidopsis NSN1 encodes a nucleolar GTP- binding protein and is required for maintenance of inflorescence meristem identity and floral organ development.	-1.51407
AT5G52650	RNA binding Plectin/S10 domain-containing protein	-1.46909
AT4G28200	U3 small nucleolar RNA-associated-like protein	-0.71545
AT5G55920	Encodes a homolog of the S. cerevisiae Nop2 that is involved in ribosome biogenesis and plays a role on organ size control by promoting cell proliferation and preventing compensation in normal leaf development.	-1.77749
AT2G47990	Encodes a transducin family nucleolar protein with six WD40 repeats that is most likely involved in 18S rRNA biogenesis. The slow progression of the gametophytic division cycles in swa1 suggested that the SWA1 protein is required for the normal progression of mitotic division cycles through the regulation of cell metabolism. Ubiquitously expressed throughout the plant.	-1.76573
AT3G49990	Low temperature viability protein	-0.983071
AT1G61580	R-protein L3 B	-1.33046
AT1G43170	Encodes a cytoplasmic ribosomal protein. The mRNA is cell-to-cell mobile.	-0.922326
AT3G16810	Encodes a member of the Arabidopsis Pumilio (APUM) proteins containing PUF domain (eight repeats of approximately 36 amino acids each). PUF proteins regulate both mRNA stability and translation through sequence-specific binding to the 3' UTR of target mRNA transcripts.	-1.22581
AT5G02870	Ribosomal protein L4/L1 family	-1.29357
AT5G15550	Transducin/WD40 repeat-like superfamily protein	-1.07043
AT4G30800	Nucleic acid-binding, OB-fold-like protein	-1.93447
AT1G01100	Co-orthologous gene of large ribosomal subunit protein RPP1.	-0.705936
AT2G40510	Ribosomal protein S26e family protein	-0.528339
AT5G15750	Alpha-L RNA-binding motif/Ribosomal protein S4 family protein	-1.30726
AT3G18130	Encodes a protein with similarity to mammalian RACKs. RACKs function to shuttle activated protein kinase C to different subcellular sites and may also function as a scaffold through physical interactions with other proteins. RACK1C has no phenotype on its own and probably acts redundantly with RACK1A and RACK1B.	-2.18614
AT3G10530	Transducin/WD40 repeat-like superfamily protein	-2.24293
AT1G15440	Encodes a nucleolar protein that is a ribosome biogenesis co-factor. Mutants display aberrant RNA processing and female gametophyte development.	-1.05729
AT3G57490	Ribosomal protein S5 family protein	-1.85889
AT1G69070	nucleolar-like protein	-1.2793
AT1G18080	Encodes the Arabidopsis thaliana homolog of the tobacco WD-40 repeat ArcA gene. It is a scaffold protein that acts downstream of and is phosphorylated by WNK8 in the glucose responsiveness and flowering pathways . Knockout mutants show insensitivity to gibberellin in GA-induced seed germination.	-0.580133
AT3G09630	Ribosomal protein L4/L1 family	-1.27649
AT1G72440	Encodes SLOW WALKER2 (SWA2), a NOC1/Mak21 homologue. Essential for coordinated cell cycle progression during female gametophyte development.	-1.24242
AT2G18020	Ribosomal protein L2 family	-0.662783
AT3G21540	transducin family protein / WD-40 repeat family protein	-1.14757
AT3G06530	ARM repeat superfamily protein	-1.17357
AT1G08410	Encodes a large 60S subunit nuclear export GTPase 1 that is required for 40S maturation and is involved in ribosome biogenesis and affects multiple auxin-regulated development processes.	-0.964282
AT3G11964	Encodes a nucleolar protein that is a ribosome biogenesis co-factor. Mutants display aberrant RNA processing and female gametophyte development.	-0.917184
AT5G47700	Co-orthologous gene of large ribosomal subunit protein RPP1.	-1.16755
AT1G57660	Translation protein SH3-like family protein	-1.27323
AT2G09990	Ribosomal protein S5 domain 2-like superfamily protein	-1.36536
AT1G33140	Encodes ribosomal protein L9. Identified in a screen for enhancers of as1. as1/pgy double mutants show defects in leaf vascular patterning and adaxial cell fate. Double mutant analysis indicates pgy genes function in the same pathway as REV, KAN1 and KAN2. The mRNA is cell-to-cell mobile.	-1.45978
AT1G57860	Translation protein SH3-like family protein	-1.48397
AT2G40590	Ribosomal protein S26e family protein	-1.25881
AT1G58380	Ribosomal protein S5 family protein	-1.85104
AT3G08520	Ribosomal protein L41 family	-1.19278
AT1G41880	Ribosomal protein L35Ae family protein	-0.824195
AT3G55750	Ribosomal protein L35Ae family protein	-0.694304
AT2G05220	Ribosomal S17 family protein	-0.454528
AT2G04390	Ribosomal S17 family protein	-0.437846
AT3G43980	Ribosomal protein S14p/S29e family protein	-0.841728

## Sheet: Mitochondrial RPs
Locus Identifier	Gene Model Description	log2 (WT+T2 / WT mock) mRNA levels
AT1G49400	Nucleic acid-binding, OB-fold-like protein	-0.869772
AT3G18760	Translation elongation factor EF1B/ribosomal protein S6 family protein	-0.956294
AT1G07830	ribosomal protein L29 family protein	-1.19409
AT5G53070	Ribosomal protein L9/RNase H1	-1.11067
AT1G80620	S15/NS1, RNA-binding protein	-1.18169
AT3G06040	Ribosomal protein L12/ ATP-dependent Clp protease adaptor protein ClpS family protein	-0.913717
AT2G42710	Ribosomal protein L1p/L10e family	-0.821303
AT4G39880	Ribosomal protein L23/L15e family protein	-0.830916
AT3G17465	encodes a putative L3 ribosomal protein targeted to the plastid.	-0.849737
AT5G23535	KOW domain-containing protein	-1.41928
AT3G49080	Mitochondrial ribosomal protein, similar to RPS9 from E.coli. Loss of function results in gametophyte lethality, particularly the megagametophyte.	-1.6778
AT1G61870	Generic translation factor involved in mitochondrial translation.	-1.38404
AT5G60960	Encodes PNM1 (for PPR protein localized to the nucleus and mitochondria 1), a PPR protein that is dual localized to mitochondria and nuclei. Loss of PNM1 function in mitochondria, but not in nuclei, is lethal for the embryo. In mitochondria, it is associated with polysomes and may play a role in translation.	-0.87218
AT4G28360	Ribosomal protein L22p/L17e family protein	-0.736566
AT3G22300	Nuclear-encoded gene for mitochondrial ribosomal small subunit protein S10	-1.04076
AT3G03600	Structural component of the mitochondrial ribosome small subunit	-1.26104
AT1G64880	Ribosomal protein S5 family protein	-0.736611

## Sheet: Biotic stress
Locus Identifier	Gene Model Description	log2(WT+T2 / WT mock) mRNA levels
AT1G07570	Protein kinase capable of phosphorylating tyrosine, serine, and threonine residues	0.679119
AT1G20640	Plant regulator RWP-RK family protein	0.709252
AT1G31540	Disease resistance protein (TIR-NBS-LRR class) family	0.644741
AT1G74360	NILR1 encodes a serine/threonine kinase involved in defense response to nematodes.	1.29437
AT1G76350	Plant regulator RWP-RK family protein	0.881982
AT2G05940	Encodes a receptor-like cytoplasmic kinase that phosphorylates the host target RIN4, leading to the activation of a plant innate immune receptor RPM1.	0.935721
AT2G20142	Toll-Interleukin-Resistance (TIR) domain family protein	1.78516
AT2G23460	encodes a novel G-alpha protein that shares similarity to plant, yeast, and animal G-alpha proteins at the C-terminus. It contains an N-terminus that is as large as the C-terminus, is a member of a small family, and is expressed in all tissues examined, including roots, leaves, stems, flowers, and fruits.	0.561977
AT2G23770	Encodes a putative LysM-containing receptor-like kinase LYK4. Shares overlapping function with LYK5 in mediating chitin-triggered immune responses. Based on protein sequence alignment analysis, it was determined as a pseudo kinase due to a lack of the ATP-binding P-loop in the kinase domain.	0.984549
AT3G04210	TN13 is a TIR-NBS protein involved in immune response. It co localizes with the ER and perinuclear membranes and interacts with MOS6.	1.94742
AT3G09830	Encodes a member of subfamily VIIa of the receptor-like cytoplasmic kinases (RLCKs). It contributes to pattern-triggered immunity in response to P. syringae.	0.853206
AT3G48090	Component of R gene-mediated disease resistance in Arabidopsis thaliana with homology to eukaryotic lipases.	0.932742
AT3G52430	Encodes a lipase-like gene that is important for salicylic acid signaling and function in resistance (R) gene-mediated and basal plant disease resistance. PAD4 can interact directly with EDS1, another disease resistance signaling protein. Expressed at elevated level in response to green peach aphid (GPA) feeding, and modulates the GPA feeding-induced leaf senescence through a mechanism that doesn…	1.18924
AT4G14370	Disease resistance protein (TIR-NBS-LRR class) family	1.98448
AT4G24020	Encodes NIN Like Protein 7 (NLP7). Modulates nitrate sensing and metabolism. Mutants of NLP7 show features of nitrogen-starved plants and are tolerant to drought stress. Localized in the nucleus and functions as a putative transcription factor. The mRNA is cell-to-cell mobile.	0.391607
AT4G26120	Ankyrin repeat family protein / BTB/POZ domain-containing protein	1.57719
AT4G34390	extra-large GTP-binding protein 2	0.701568
AT4G36150	Disease resistance protein (TIR-NBS-LRR class) family	0.884616
AT5G35580	Protein kinase superfamily protein	1.91544
AT5G41750	Disease resistance protein (TIR-NBS-LRR class) family	3.79812
AT5G45250	RPS4 belongs to the Toll/interleukin-1 receptor (TIR)-nucleotide binding site (NBS)-Leu-rich repeat (LRR) class of disease resistance (R ) genes. Confers specific resistance to Pseudomonas syringae pv. tomato carrying the avirulence gene AvrRPS4. Produces alternative transcripts with truncated open reading frames.	0.599741
AT5G51630	Disease resistance protein (TIR-NBS-LRR class) family	0.773622

## Sheet: Autophagy
Locus Identifier	Gene Model Description	log2(WT+T2 / WT mock) mRNA levels
AT1G03380	yeast autophagy 18 G-like protein	0.785076
AT1G17780	ATG8A/F interacting protein containing a WxxL LIR motif at the C terminus which is essential for interaction with ATG8. Stress (abiotic or biotic) results in the formation of ATG8- and ATI3-labeled punctate structures, likely reflecting increased formation of ATG8-labeled phagophores or autophagosomes. ATI3 proteins probably act as selective autophagy receptors that target specific cellular compo…	0.785876
AT1G54710	autophagy 18h-like protein	0.954579
AT1G62040	Autophagy protein.	0.739347
AT2G05630	in the Arabidopsis autophagy pathway	1.3366
AT2G40810	yeast autophagy-like protein	1.05239
AT2G45170	Involved in autophagy. Under nutrient starvation the protein localizes to autophagosomes.	1.13857
AT2G45980	Encodes an Atg8-interacting protein that is partially associated with the ER during favorable growth conditions and becomes mainly associated with a spherical compartment that dynamically moves along the ER network. In stress induced plants, ATI1 is localized to a novel plastid associated bodies that are transported to vesicles, in what appears to be an autophagy dependent process. ATI1 interacts…	0.491446
AT3G06420	Autophagy protein.	1.10975
AT3G15580	Encodes APG8, a component of autophagy conjugation pathway. Delivered to the lumens of vacuole under nitrogen-starvation condition.	0.986451
AT3G18770	Autophagy-related protein 13	1.5156
AT3G49590	Autophagy-related protein 13	0.567791
AT3G56440	yeast autophagy 18 D-like protein	1.97853
AT3G60640	Autophagy protein.	2.03391
AT3G61960	Protein kinase superfamily protein	0.729814
AT3G62770	Required for autophagosome formation during nutrient deprivation and senescence, promotes pexophagy during seedling development.	0.727465
AT4G00355	Encodes an Atg8-interacting protein that is partially associated with the ER during favorable growth conditions and becomes mainly associated with a spherical compartment that dynamically moves along the ER network.	1.0853
AT4G16520	Autophagy protein.	1.21592
AT4G21980	Encodes APG8, a component of autophagy conjugation pathway. Delivered to the lumens of vacuole under nitrogen-starvation condition. Highest expression in flowers. mRNA abundance increased during dark-induced carbon starvation. Predominantly cytoplasmic with or without N starvation. Upon concanamycin A the protein accumulates in the central vacuole as punctuate structures that resemble autophagic …	0.926795
AT4G24690	Encodes NBR1, a selective autophagy substrate. The mRNA is cell-to-cell mobile.	0.519077
AT4G30790	Encodes autophagy-related 2 (ATG11)	0.970601
AT5G54730	yeast autophagy 18 F-like protein	0.715259
AT5G61500	autophagy-related (ATG) gene	1.12853
AT5G66930	meiotically up-regulated protein	1.57199

## Sheet: Secondary metabolism
Locus Identifier	Gene Model Description	log2(WT+T2 / WT mock) mRNA levels
AT1G03940	HXXXD-type acyl-transferase family protein	1.05622
AT1G15670	Encodes a member of a family of F-box proteins, called the KISS ME DEADLY (KMD) family, that targets type-B ARR proteins for degradation and is involved in the negative regulation of the cytokinin response. Also named as KFB1, a member of a group of Kelch repeat F-box proteins that negatively regulate phenylpropanoid biosynthesis by targeting the phenypropanoid biosynthesis enzyme phenylalanine a…	0.898563
AT1G31910	GHMP kinase family protein	-0.534114
AT1G58440	Encodes a putative protein that has been speculated, based on sequence similarities, to have squalene monooxygenase activity.	0.515268
AT1G62570	belongs to the flavin-monooxygenase (FMO) family, encodes a glucosinolate S-oxygenase that catalyzes the conversion of methylthioalkyl glucosinolates to methylsulfinylalkyl glucosinolates The mRNA is cell-to-cell mobile.	1.03608
AT1G74090	encodes a desulfoglucosinolate sulfotransferase, involved in the final step of glucosinolate core structure biosynthesis. Has a broad-substrate specificity with preference with methionine-derived desulfoglucosinolates.	1.01704
AT1G74100	encodes a desulfoglucosinolate sulfotransferase, involved in the final step of glucosinolate core structure biosynthesis. Has a broad-substrate specificity with different desulfoglucosinolates, the best substrate is indole-3-methyl-dsGS, followed by benzyl-dsGS. Expression was induced by wounding, jasmonate and ethylene stimulates.	0.557623
AT1G80440	Encodes a member of a family of F-box proteins, called the KISS ME DEADLY (KMD) family, that targets type-B ARR proteins for degradation and is involved in the negative regulation of the cytokinin response. Also named as KFB20, a member of a group of Kelch repeat F-box proteins that negatively regulate phenylpropanoid biosynthesis by targeting the phenypropanoid biosynthesis enzyme phenylalanine …	0.58997
AT2G15480	UDP-glucosyl transferase 73B5	1.00956
AT2G25450	Encodes a 2-oxoacid-dependent dioxygenase involved in the production of 2-hydroxybut-3-enyl glucosinolate.	-0.474787
AT2G33070	Encodes a nitrile-specifier protein NSP2. NSP2 is one out of five (At3g16400/NSP1, At2g33070/NSP2, At3g16390/NSP3, At3g16410/NSP4 and At5g48180/NSP5) A. thaliana epithiospecifier protein (ESP) homologues that promote simple nitrile, but not epithionitrile or thiocyanate formation.	1.51718
AT3G44310	Mutants are resistant to indole-3-acetonitrile (IAN). NIT1 catalyzes the terminal activation step in indole-acetic acid biosynthesis. Predominantly expressed isoform of nitrilase isoenzyme family. Aggregation of NIT1 in cells directly abutting wound sites is one of the earliest events associated with wound and herbicide-induced cell death. The protein undergoes thiolation following treatment with…	0.352998
AT3G48170	ALDH10A9 encodes a protein that can function as a betaine aldehyde dehydrogenase in vitro. The C-terminal amino acids of this protein direct GFP to the peroxisome suggesting that ALDH10A9 accumulates in this organelle. ALDH10A9 transcript levels rise in response to ABA, NaCl, chilling, methyl viologen, and dehydration stress. The enzyme can catalyze the formation of glycine betaine in vitro, but …	0.614148
AT4G15560	Encodes a protein with 1-deoxyxylulose 5-phosphate synthase activity involved in the MEP pathway. It is essential for chloroplast development in Arabidopsis	0.458849
AT4G19170	chloroplast-targeted member of a family of enzymes similar to nine-cis-epoxycarotenoid dioxygenase The mRNA is cell-to-cell mobile.	1.15528
AT4G22880	encodes leucoanthocyanidin dioxygenase, which is involved in proanthocyanin biosynthesis. Mutant analysis suggests that this gene is also involved in vacuole formation.	0.825896
AT4G29890	choline monooxygenase, putative (CMO-like)	0.916152
AT4G37760	squalene epoxidase 3	0.475868
AT4G39950	Belongs to cytochrome P450 and is involved in tryptophan metabolism. Converts Trp to indo-3-acetaldoxime (IAOx), a precursor to IAA and indole glucosinolates. The mRNA is cell-to-cell mobile.	0.718046
AT5G08640	Encodes a flavonol synthase that catalyzes formation of flavonols from dihydroflavonols. Co-expressed with CHI and CHS (qRT-PCR).	-0.67193
AT5G22300	encodes a nitrilase isomer. The purified enzyme shows a strong substrate specificity for beta-cyano-L-alanine, a intermediate product of the cyanide detoxification pathway. The mRNA is cell-to-cell mobile.	1.06479
AT5G42800	dihydroflavonol reductase. Catalyzes the conversion of dihydroquercetin to leucocyanidin in the biosynthesis of anthocyanins. Not expressed in roots (qRT-PCR). The mRNA is cell-to-cell mobile.	0.754624
AT5G52570	Converts &#946;-carotene to zeaxanthin via cryptoxanthin.	0.578991
AT5G57030	Lutein-deficient 2 (LUT2) required for lutein biosynthesis, member of the xanthophyll class of carotenoids. Encodes lycopene epsilon cyclase	0.685031
AT5G57220	member of CYP81F, involved in glucosinolate metabolism. Mutants had impaired resistance to fungi. The mRNA is cell-to-cell mobile.	2.48105

## Sheet: Protein degradation
Locus Identifier	Gene Model Description	log2(WT+T2 / WT mock) mRNA levels
AT1G01300	Eukaryotic aspartyl protease family protein	-0.496756
AT1G02305	Encodes a capase involved in stress induced cell death.	0.463274
AT1G03220	Eukaryotic aspartyl protease family protein	0.65886
AT1G03230	Eukaryotic aspartyl protease family protein	0.879304
AT1G05690	BTB and TAZ domain protein. Acts redunantly with BT1 and BT2 during female gametophyte development. Acts with BT2 during male gametophyte development.	1.2684
AT1G06430	encodes a FtsH protease that is localized to the chloroplast	0.565497
AT1G06900	Insulinase (Peptidase family M16) family protein	-0.809867
AT1G07510	encodes an FtsH protease that is localized to the mitochondrion	0.743568
AT1G08050	Zinc finger (C3HC4-type RING finger) family protein	1.63331
AT1G14400	ubiquitin carrier protein	0.410137
AT1G19310	RING/U-box superfamily protein	1.33892
AT1G21760	This gene is predicted to encode an F-box protein that is evolutionarily conserved between Arabidopsis and other eukaryotes including S.cerevisiae and humans. It may play a role in regulating translation under conditions of temperature stress. FBP7 transcript levels are increased at high and low temperatures. The mRNA is cell-to-cell mobile.	0.708905
AT1G22920	AJH1 encodes a protein similar to JAB1, a specific mammalian coactivator of AP-1 transcription. Encodes a subunit of the COP9 complex that is involved in protein deneddylation. Plants with mutations in CSN5A and CSN5B have a de-etiolated phenotype.	-0.644951
AT1G23260	MMZ1/UEV1A encodes a protein that may play a role in DNA damage responses and error-free post-replicative DNA repair by participating in lysine-63-based polyubiquitination reactions. UEV1A can form diubiquitin and triubiquitin chains in combination with UBC13A/UBC35 in vitro. It can also functionally complement an mms2 mutation in budding yeast, both by increasing mms2 mutant viability in the pre…	0.929878
AT1G23440	Peptidase C15, pyroglutamyl peptidase I-like protein	0.887209
AT1G24440	RING/U-box superfamily protein	0.74913
AT1G35340	ATP-dependent protease La (LON) domain protein	0.758269
AT1G49970	Encodes a ClpP-related sequence. Though similar to ClpP proteins, this does not contains the highly conserved catalytic triad of Ser-type proteases (Ser-His-Asp). The name reflects nomenclature described in Adam et. al (2001).	0.354999
AT1G50250	encodes an FTSH protease that is localized to the chloroplast. Involved in the D1 repair cycle of Photosystem II. FtsH1 and FtsH5 are interchangeable in thylakoid membranes.	0.572039
AT1G51760	encodes a member of the six Arabidopsis IAA-amino acid conjugate hydrolase subfamily and conjugates and conjugates IAA-Ala in vitro. Gene is expressed most strongly in roots, stems, and flowers. The mRNA is cell-to-cell mobile.	0.704099
AT1G63800	ubiquitin-conjugating enzyme 5	1.27677
AT1G63840	RING/U-box superfamily protein	0.816811
AT1G70170	mutant has Late flowering; Early senescence; Matrix Metalloproteinase	1.74446
AT1G71020	Encodes a nuclear localized plant U-Box protein that interacts with MYC2 and regulates its stability by acting as an E3 ubiquitin ligase and polyubiquitinating MYC2. By this mechanism, it targets MYC2 for destruction thereby affecting JA signaling.	-0.526192
AT1G75460	ATP-dependent protease La (LON) domain protein	0.562338
AT1G79380	Encodes a ubiquitin ligase that is an essential upstream modulator of JA signaling in response to various stimuli.	0.607053
AT1G79720	Eukaryotic aspartyl protease family protein	0.599653
AT2G01735	encodes a RING-H2 zinc finger protein essential for seed development.	0.955363
AT2G21270	ubiquitin fusion degradation 1	0.469081
AT2G30950	Metalloprotease that functions in thylakoid membrane biogenesis. Involved in the repair of PSII following damaged incurred during photoinhibition. Forms a complex with VAR1. Mutants show a variegated phenotype, which decreases during development. Transcript and protein levels increase with light intensity. In plsp1-1 mutant plastids, the nonmature form of the protein localizes in the membrane.	0.373094
AT2G31510	IBR domain-containing protein	0.521408
AT2G32560	F-box family protein	0.89807
AT2G35635	encodes a ubiquitin-like protein that contains tandem repeats of the ubiquitin coding region, but at least one repeat per gene encodes a protein with amino acid substitutions. The mRNA is cell-to-cell mobile.	0.50208
AT2G37150	RING/U-box superfamily protein	0.935681
AT2G44410	RING/U-box superfamily protein	0.593422
AT2G45240	Encodes a cytoplasmic MAP1 like methionine aminopeptidase which is involved in removing the N-terminal methionine from proteins. Induced mutants using RNAi technology which knocks out both MAP1 and MAP2 like genes show abnormal development.	-0.727709
AT2G46030	Ubiquitin conjugating enzyme E2	0.841903
AT2G46260	Involvement in protein ubiquitylation is predicted based on physical interaction with CULLIN 3 proteins.	0.699062
AT2G47700	RING/U-box superfamily protein	0.555308
AT3G02290	RING/U-box superfamily protein	1.23181
AT3G05200	Encodes a putative RING-H2 zinc finger protein ATL6 (ATL6). The mRNA is cell-to-cell mobile.	1.01706
AT3G07360	Encodes a protein containing a U-box and an ARM domain. This protein has E3 ubiquitin ligase activity based on in vitro assays.	0.692909
AT3G07950	rhomboid protein-like protein	-0.520413
AT3G12700	Encodes an aspartic protease has an important regulatory function in chloroplasts that not only influences photosynthetic carbon metabolism but also plastid and nuclear gene expression.	0.726616
AT3G13430	RING/U-box superfamily protein	0.858935
AT3G14067	Encodes a protein with similarity to serine protease, subtilisin, that is upregulated during senescence and expressed in the arial portions of the plant.Loss of function mutations have increased branch number but normal silique length and seed set and therefore have increased fertility.	0.628474
AT3G14290	Encodes 20S proteasome subunit PAE2 (PAE2) that has RNase activity.	-0.49929
AT3G14400	Encodes a ubiquitin-specific protease.	-1.25917
AT3G15354	Encodes a member of the SPA (suppressor of phyA-105) protein family (SPA1-SPA4). SPA proteins contain an N-terminal serine/threonine kinase-like motif followed by a coiled-coil structure and a C-terminal WD-repeat domain. SPA proteins function redundantly in suppressing photomorphogenesis in dark- and light-grown seedlings. SPA3 (and SPA4) predominantly regulates elongation growth in adult plants.	0.6071
AT3G17000	Group XIV ubiquitin-conjugating enzyme that functions negative regulation of drought stress.	0.811909
AT3G23280	Encodes a ubiquitin ligase that is a novel player in ethylene signaling involved in negatively regulating apical hook curvature, with alternative splicing controlling dual targeting to the nuclear and cytoplasmic compartments.	0.472442
AT3G27110	PGM48 is a member of a plant specific clade of metallo-endopeptidase proteins. It is found in plastoglobules. Analysis of over-expression and loss of function phenotypes suggests PGM48 may have a role in positively regulating senescence.	0.629195
AT3G27925	Encodes a DegP protease; nuclear gene encoding chloroplast-targeted protease that can degrade two lumenal proteins, plastocyanin and OE33, suggesting a role as a general-purpose protease in the thylakoid lumen. Involved in the degradation of D1 protein of PS II, hence participating in the repair of PS II damages caused by photoinhibition. The mRNA is cell-to-cell mobile.	0.540888
AT3G29270	RING/U-box superfamily protein	1.05124
AT3G46620	Encodes an ABA- and drought-induced RING-DUF1117 gene whose mutation results in hyposensitive phenotypes toward ABA in terms of germination rate and stomatal closure and markedly reduced tolerance to drought stress relative to wild-type plants.	0.702776
AT3G48350	Involved in starvation-related responses that curtail primary root growth under severe nutrient limitation.	-0.629307
AT3G54400	Eukaryotic aspartyl protease family protein	-0.997298
AT3G55380	ubiquitin-conjugating enzyme 14	-1.03548
AT3G61600	POZ/BTB containing-protein AtPOB1. Involvement in protein ubiquitylation is predicted based on physical interaction with CULLIN 3 proteins. The mRNA is cell-to-cell mobile.	0.493698
AT4G01320	CAAX protease with broad substrate specificity. Localized exclusively to the endoplasmic reticulum.	-0.773043
AT4G02890	Polyubiquitin gene containing 4 ubiquitin repeats.	1.67581
AT4G05050	polyubiquitin gene, belongs to a subtype group with UBQ10 and UBQ14. Various ecotypes of Arabidopsis have different numbers of ubiquitin repeats within this gene.	1.3938
AT4G05320	One of five polyubiquitin genes in A. thaliana. These genes encode the highly conserved 76-amino acid protein ubiquitin that is covalently attached to substrate proteins targeting most for degradation. Polyubiquitin genes are characterized by the presence of tandem repeats of the 228 bp that encode a ubiquitin monomer. Induced by salicylic acid. Independent of NPR1 for their induction by salicyli…	1.57997
AT4G11360	Encodes a putative RING-H2 finger protein RHA1b. The mRNA is cell-to-cell mobile.	1.50696
AT4G12570	Knock-out mutants showed accelerated senescence of leaves. The mRNA is cell-to-cell mobile.	0.780308
AT4G14365	hypothetical protein	2.32218
AT4G15880	EARLY IN SHORT DAYS 4 Arabidopsis mutant shows extreme early flowering and alterations in shoot development. It encodes a SUMO protease, located predominantly at the periphery of the nucleus. Accelerates the transition from vegetative growth to flowering. Probably acts in the same pathway as NUA in affecting flowering time, vegetative and inflorescence development. The mRNA is cell-to-cell mobile.	-0.63673
AT4G16190	Papain family cysteine protease	1.11648
AT4G21100	One of two closely related genes similar to a damaged DNA binding protein originally described in mammals. May form a complex with DET1 to regulate photomorphogenesis. Loss of function mutations are lethal. The DDB1b protein binds with a number of DWD-containing proteins and may form part of a CUL4-based E3 ubiquitin ligase.	-0.793482
AT4G21810	DERLIN-2.1	0.540859
AT4G25660	PPPDE putative thiol peptidase family protein	0.823912
AT4G26840	Encodes a small ubiquitin-like modifier (SUMO) polypeptide that becomes covalently attached to various intracellular protein targets, much like ubiquitination, leading to post-translational modification of those targets.	-0.762931
AT4G28270	Encodes a RING finger E3 ubiquitin ligase. Binds and ubiquitinates ABP1 in vivo and in vitro.	0.621359
AT4G30530	Encodes a gamma-glutamyl peptidase, outside the GGT family, that can hydrolyze gamma-glutamyl peptide bonds. The mRNA is cell-to-cell mobile.	0.657971
AT4G30890	Encodes a ubiquitin-specific protease.	-0.622874
AT4G31450	RING/U-box superfamily protein	0.539347
AT4G33565	RING/U-box superfamily protein	0.659597
AT4G39090	Similar to cysteine proteinases, induced by desiccation but not abscisic acid. Required for RRS1-R mediated resistance against Ralstonia solanacearum. Interacts with the R. solanacearum type III effector PopP2. RD19 associates with PopP2 to form a nuclear complex that is required for activation of the RRS1-R?mediated resistance response.	0.541692
AT5G01520	Encodes a cytosolic RING-type E3 ubiquitin (Ub) ligase that is critical for ABA and high salinity responses during germination. AtAIRP2 and SDIR1 likely play a combinatory role in ABA signaling and the response to high salt in Arabidopsis.	0.905535
AT5G02310	Encodes PROTEOLYSIS6 (PRT6), a component of the N-end rule pathway that targets protein degradation through the identity of the amino-terminal residue of specific protein substrates. Another component of the N-end rule pathway is arginyl-tRNA:protein arginyltransferase (ATE). Arabidopsis contains two ATE genes: At5g05700/ATE1, At3g11240/ATE2. PRT6 and ATE were shown to regulate seed after-ripenin…	0.446171
AT5G02880	encodes a ubiquitin-protein ligase containing a HECT domain. There are six other HECT-domain UPLs in Arabidopsis. The mRNA is cell-to-cell mobile.	0.730126
AT5G03240	encodes ubiquitin that is attached to proteins destined for degradation. UBQ3 is most homologous with UBQ4, and is expressed in higher levels in vegetative tissue but lower levels in flowers than UBQ4. UBQ3 encodes different number of ubiquitins in different ecotypes. UBQ3 transcript level is modulated by UV-B and light/dark treatments.	0.950939
AT5G06600	Encodes a ubiquitin-specific protease.	-0.319344
AT5G09800	ARM repeat superfamily protein	1.77785
AT5G10770	Eukaryotic aspartyl protease family protein	0.70419
AT5G18760	RING/U-box superfamily protein	0.796213
AT5G19180	Encodes a subunit of a RUB-activating enzyme analogous to the E1 ubiquitin-activating enzyme. ECR1 functions as a heterodimer with AXR1 to activate RUB, a ubiquitin-related protein.	-0.786947
AT5G20620	encodes a ubiquitin polyprotein.	1.34196
AT5G22850	Eukaryotic aspartyl protease family protein	0.665561
AT5G27420	Encodes CNI1 (Carbon/Nitrogen Insensitive1) (also named as ATL31), a RING type ubiquitin ligase that functions in the Carbon/Nitrogen response for growth phase transition in Arabidopsis seedlings. The mRNA is cell-to-cell mobile.	1.75931
AT5G38895	RING/U-box superfamily protein	1.84361
AT5G41340	Belongs to Ubiquitin conjugating enzyme family. Gene expression is developmentally regulated.	0.798068
AT5G46740	Encodes a ubiquitin-specific protease.	-0.86446
AT5G47040	Encodes a member of the Lon protease-like proteins (Lon1/At5g26860, Lon2/At5g47040, Lon3/At3g05780, Lon4/At3g05790). Lon is a multifunctional ATP-dependent protease which exists in bacteria, archaea and within organelles in eukaryotic cells. Lon proteases are responsible for the degradation of abnormal, damaged and unstable proteins.	0.483293
AT5G53350	CLP protease regulatory subunit CLPX mRNA, nuclear gene	0.607491
AT5G56340	RING/U-box superfamily protein	0.503963
AT5G56650	encodes a protein similar to IAA conjugate hydrolases. Enzyme assays with purified GST-tagged protein shows some activity in vitro but too low to be physiologically significant.	0.6771
AT5G57900	F-box protein, interacts with SKP1/ASK1 subunit of SCF ubiquitin ligase in a glucose-dependent manner	0.787898
AT5G57990	Encodes a ubiquitin-specific protease.	-0.834941
AT5G58870	encodes an FtsH protease that is localized to the chloroplast	0.907579
AT5G60360	Encodes a senescence-associated thiol protease. The mRNA is cell-to-cell mobile.	0.788203
AT5G60820	RING/U-box superfamily protein	1.13057
AT5G64660	CYS, MET, PRO, and GLY protein 2	1.39506
AT5G67140	F-box/RNI-like superfamily protein	1.67519
AT5G67340	ARM repeat superfamily protein	2.61684

## Sheet: Transcriptional activation
Locus Identifier	Gene Model Description	log2(WT+T2 / WT mock) mRNA levels
AT1G09060	JMJ24 is a nuclear localized JmjC domain containing protein. It has been shown to bind to transcribed regions AtSN1 and solo LTR and the promoter of SDC. JMJ24 appears to regulate basal levels of transcription of silenced loci in part by controlling methylation in heterochromatic regions.	0.47064
AT1G13450	Encodes GT-1, a plant transcription factor that binds to one of the cis-acting elements, BoxII, which resides within the upstream promoter region of light-responsive genes. GT-1 was assumed to act as a molecular switch modulated through Ca(2+)-dependent phosphorylation/dephosphorylation in response to light signals.	0.653754
AT1G14600	Homeodomain-like superfamily protein	1.85636
AT1G14920	Similar to a putative transcription factor and transcriptional coactivators. Repressor of GA responses and involved in gibberellic acid mediated signaling. Member of the DELLA proteins that restrain the cell proliferation and expansion that drives plant growth. The protein undergoes degradation in response to GA via the 26S proteasome. GAI may be involved in reducing ROS accumulation in response …	0.515484
AT1G18570	Encodes a member of the R2R3-MYB transcription family. Involved in indole glucosinolate biosynthesis. The mRNA is cell-to-cell mobile.	1.51664
AT1G19000	Homeodomain-like superfamily protein	0.45169
AT1G19700	Encodes a member of the BEL family of homeodomain proteins. Its interaction with PLP (PAS/LOV PROTEIN) is diminished by blue light.	0.842468
AT1G20910	ARID/BRIGHT DNA-binding domain-containing protein	-0.877258
AT1G21000	PLATZ transcription factor family protein	1.00871
AT1G21450	Encodes a scarecrow-like protein (SCL1). Member of GRAS gene family. The mRNA is cell-to-cell mobile.	0.450135
AT1G25280	Member of TLP family	0.440447
AT1G25440	B-box type zinc finger protein with CCT domain-containing protein	0.491897
AT1G26300	BSD domain-containing protein	1.12944
AT1G30810	JMJ18 encodes a novel JmjC domain- containing histone H3K4 demethylase.	0.770153
AT1G32150	Encodes a G group bZIP transcription factor family member that can bind cis elements with an ACGT core, such as G-box, Hex, C-box and As-1. The protein is localized in the nucleus and can homodimerize and can heterodimerize with other G group members.	0.716617
AT1G32700	PLATZ transcription factor family protein	0.950549
AT1G34190	Encodes a NAC domain transcription factor that regulates the mitochondrial retrograde response and coordinates organellar functions and stress responses.	0.466817
AT1G47270	Member of TLP family of tubby like proteins that also contain an F-Box. Localized to the plasma membrane.	0.959926
AT1G49010	Duplicated homeodomain-like superfamily protein	0.675724
AT1G50600	Encodes a scarecrow-like protein (SCL5). Member of GRAS gene family.	0.490778
AT1G51140	Encodes a basic helix-loop-helix-type transcription factor involved in photoperiodism flowering. Binds to the E-box cis-element in the CONSTANS (CO) promoter to regulate flowering. Interacts with CFL1 and along with CFLAP2 negatively regulates cuticle development. Binds to the potassium channel gene KAT1 as a dimer. The DNA-binding capacity is inhibited in response to ABA through phosphorylation-…	0.954081
AT1G51700	Encodes dof zinc finger protein (adof1). The mRNA is cell-to-cell mobile.	0.624671
AT1G56650	Encodes a putative MYB domain containing transcription factor involved in anthocyanin metabolism and radical scavenging. Essential for the sucrose-mediated expression of the dihydroflavonol reductase gene. Auxin and ethylene responsiveness of PAP1 transcription is lost in myb12 mutants. Interacts with JAZ proteins to regulate anthocyanin accumulation.	1.32797
AT1G61730	DNA-binding storekeeper protein-related transcriptional regulator	-0.768885
AT1G62300	Encodes a transcription factor WRKY6. Regulates Phosphate1 (Pho1) expression in response to low phosphate (Pi) stress.	1.05211
AT1G67310	Calmodulin-binding transcription activator protein with CG-1 and Ankyrin domain	0.934336
AT1G68130	Encodes the longer of two splice variants of a transcription factor involved in regulating starch metabolism in response to cold.	-0.888168
AT1G68550	encodes a member of the ERF (ethylene response factor) subfamily B-6 of ERF/AP2 transcription factor family. The protein contains one AP2 domain. There are 12 members in this subfamily including RAP2.11.	-1.40409
AT1G68840	Rav2 is part of a complex that has been named `regulator of the (H+)-ATPase of the vacuolar and endosomal membranes' (RAVE) The mRNA is cell-to-cell mobile.	0.696255
AT1G72450	JAZ6 transcript levels rise in response to a jasmonate stimulus and a GFP:JAZ6 fusion protein localizes to the nucleus. Application of jasmonate methyl ester to Arabidopsis roots reduces the levels of a JAZ6:GUS fusion protein, presumably by stimulating ubiquitin-proteasome-mediated degradation.	0.636649
AT1G73870	B-box type zinc finger protein with CCT domain-containing protein	1.70732
AT1G74660	Encodes MINI ZINC FINGER 1 (MIF1) which has a zinc finger domain but lacks other protein motifs normally present in transcription factors. MIF1 physically interact with a group of zinc finger-homeodomain (ZHD) transcription factors, such as ZHD5 (AT1G75240), that regulate floral architecture and leaf development. Gel mobility shift assays revealed that MIF1 blocks the DNA binding activity of ZHD5…	1.18404
AT1G74840	Homeodomain-like superfamily protein	0.489125
AT1G75080	Encodes a positive regulator of the brassinosteroid (BR) signalling pathway that mediates both downstream BR responses and negative feedback regulation of BR biosynthesis. There is evidence for phosphorylation-dependent nucleocytoplasmic shuttling of BZR1. GSK3-like kinases (including BIN2), 14-3-3 proteins, and the phosphatase BSU1 seem to participate in this process. Phosphorylation also appear…	0.782263
AT1G75240	Encodes a zinc finger-homeodomain transcription factor ZHD5. Nuclear import and DNA binding of the ZHD5 transcription factor is modulated by a competitive peptide inhibitor MIF1 (AT1G74660).	-0.869861
AT1G75390	basic leucine-zipper 44	0.895925
AT1G76890	encodes a plant trihelix DNA-binding protein	0.542015
AT1G77920	bZIP transcription factor family protein	0.752574
AT2G20280	Zinc finger C-x8-C-x5-C-x3-H type family protein	-0.678071
AT2G22300	Encodes a putative CAM binding transcription factor. Loss of function mutations show enhanced resistance to fungal and bacterial pathogens suggesting that CAMTA functions to suppress defense responses.It acts in the cold response pathway, it can bind to and activate the expression of DREB1 genes.	0.936992
AT2G22430	Encodes a homeodomain leucine zipper class I (HD-Zip I) protein that is a target of the protein phosphatase ABI1 and regulates hormone responses in Arabidopsis.	0.590091
AT2G22770	Regulates the development of ER bodies. also involves in response to the endophytic fungus Piriformospora indica.	-0.722755
AT2G23760	Encodes a member of the BEL family of homeodomain proteins. Plants doubly mutant for saw1/saw2 (blh2/blh4) have serrated leaves. BP is expressed in the serrated leaves, therefore saw2 and saw1 may act redundantly to repress BP in leaves.	0.520644
AT2G25180	Encodes an Arabidopsis response regulator (ARR) protein that acts in concert with other type-B ARRs in the cytokinin signaling pathway. Also involved in cytokinin-dependent inhibition of hypocotyl elongation and cytokinin-dependent greening and shooting in tissue culture. ARR1, ARR10, and ARR12 are redundant regulators of drought response, with ARR1 being the most critical.The retention of leaf w…	0.381315
AT2G25620	Encodes DBP1, a member of the DBP factors (DNA-binding protein phosphatases) featuring sequence-specific DNA-binding and protein phosphatase activity. DBP1 is involved in plant-potyvirus interactions. Loss-of-function of DBP1 renders resistance to potyviruses.	-1.59795
AT2G27050	ethylene-insensitive3-like1 (EIL1) The mRNA is cell-to-cell mobile.	0.38202
AT2G27100	Identified as a leaf form mutant by Redei having serrated leaves. Further analysis of the single loss of function allele indicated pleiotropic effects extending to many aspects of shoot development such as taller meristems, alterations in phase transition, phyllotaxy and branching. Encodes a single zinc finger containing protein that is expressed in meristems and organ primordia and forms a compl…	-0.744272
AT2G28450	zinc finger (CCCH-type) family protein	-0.909291
AT2G30250	member of WRKY Transcription Factor; Group I. Located in nucleus. Involved in response to various abiotic stresses - especially salt stress.	0.850966
AT2G36080	Encodes a plant-specific B3 DNA-binding domain transcription factor. Has transcription repressor activity.	-1.24747
AT2G37430	Encodes a member of the zinc finger family of transcriptional regulators. It is expressed in many root tips, primary roots, cotyledons and hypocotyl. The protein is localized to the nucleus. Overexpression of ZAT11 causes increased root growth and increased sensitivity to nickel ions. The mRNA is cell-to-cell mobile.	2.26602
AT2G38470	Member of the plant WRKY transcription factor family. Regulates the antagonistic relationship between defense pathways mediating responses to P. syringae and necrotrophic fungal pathogens. Located in nucleus. Involved in response to various abiotic stresses - especially salt stress.	1.15287
AT2G40140	zinc finger (CCCH-type) family protein	0.855522
AT2G40950	bZIP17 appears to regulate transcription as part of a salt and osmotic stress response. zip17 mutants show enhanced inhibition of primary root elongation in response to NaCl. Several salt-responsive genes, such as ATHB-7 show a reduced transcriptional response to a salt treatment in zip17 mutant seedlings. myc:bZIP17 undergoes proteolytic processing in salt-treated wild type seedlings, but not in…	-0.61754
AT2G41900	CCCH-type zinc finger protein with ARM repeat domain-containing protein	-0.456884
AT2G42400	VOZ transcription factor which acts as positive regulator of several salt-responsive genes. Functionally redundant in salt stress with VOZ1.	0.66593
AT2G46310	CRF5 encodes one of the six cytokinin response factors. It is transcriptionally upregulated in response to cytokinin. CRF5 belongs to the AP2/ERF superfamily of the transcriptional factors. CRF proteins rapidly relocalize to the nucleus in response to cytokinin. Analysis of loos-of-function mutants revealed that the CRFs function redundantly to regulate the development of embryos, cotyledons and …	-1.39395
AT2G46400	Encodes a WRKY transcription factor that contributes to the feedforward inhibition of osmotic/salt stress-dependent LR inhibition via regulation of ABA signaling and auxin homeostasis.	1.44954
AT2G47890	B-box type zinc finger protein with CCT domain-containing protein	1.06673
AT3G01470	Encodes a homeodomain leucine zipper class I (HD-Zip I) transcriptional activator involved in leaf and hypocotyl development. Its promoter is bound by PIF1 which likely regulates its expression. Its translation is regulated by a conserved upstream ORF (CPuORF33).	0.829582
AT3G01600	NAC domain containing protein 44	-2.2154
AT3G02380	homologous to the flowering-time gene CONSTANS (CO) encoding zinc-finger proteins	0.776633
AT3G02830	Encodes a zinc finger protein that binds to PORA mRNA in vivo and recruits the Pfr form of phytochrome to the 5&#8242;-UTR of PORA mRNA to regulate translation of the mRNA.	0.548796
AT3G10500	Encodes a transcriptional activator that is associated with the plasma membrane in a dormant form and is proteolytically cleaved to create a form that can enter the nucleus. It is thought to promote ROS production by binding directly to the promoters of genes encoding ROS biosynthetic enzymes during drought-induced leaf senescence. The mRNA is cell-to-cell mobile.	0.748837
AT3G11100	SANT and trihelix-domain protein. Interacts with agrobacterium virulence protein VirF. It also plays a role in regulation of histone acetylation during ethylene signaling. It binds EIN2 and EIN3 and histone H3.	0.836523
AT3G12560	Encodes a telomeric DNA-binding protein.	1.0725
AT3G13040	myb-like HTH transcriptional regulator family protein	0.336648
AT3G14230	encodes a member of the ERF (ethylene response factor) subfamily B-2 of ERF/AP2 transcription factor family (RAP2.2). The protein contains one AP2 domain. There are 5 members in this subfamily including RAP2.2 AND RAP2.12.	-0.356905
AT3G16940	calmodulin-binding transcription activator	0.835758
AT3G17100	sequence-specific DNA binding transcription factor	0.59044
AT3G17250	Protein phosphatase 2C family protein	1.49324
AT3G19360	Zinc finger (CCCH-type) family protein	-1.27619
AT3G23250	Member of the R2R3 factor gene family.	2.57876
AT3G24120	MYB-CC protein involved in regulation of response to phosphate starvation.	0.618093
AT3G25890	encodes a member of the ERF (ethylene response factor) subfamily B-6 of ERF/AP2 transcription factor family. The protein contains one AP2 domain. There are 12 members in this subfamily including RAP2.11. The mRNA is cell-to-cell mobile.	-1.83965
AT3G46090	C2H2 and C2HC zinc fingers superfamily protein	1.76808
AT3G46590	Encodes a protein that specifically binds plant telomeric DNA (TTTAGGG)n repeats. Involved in bending DNA. Expressed throughout the plant with highest levels in flowers.	0.944104
AT3G47620	Encodes a transcription factor AtTCP14 that regulates seed germination. AtTCP14 shows elevated expression level just prior to germination. AtTCP14 is predominantly expressed in the vascular tissue of the embryo, and affects gene expression in radicles in a non-cell-autonomous manner.	-0.545393
AT3G49800	BSD domain-containing protein	0.971357
AT3G49940	LOB domain-containing protein 38	-0.780365
AT3G50260	Encodes a member of the DREB subfamily A-5 of ERF/AP2 transcription factor family. The protein contains one AP2 domain. Involved in defense and freezing stress responses. There are 16 members in this subfamily including RAP2.1, RAP2.9 and RAP2.10. The mRNA is cell-to-cell mobile.	1.57213
AT3G50650	GRAS family transcription factor	1.02519
AT3G50750	BES1/BZR1 homolog 1	0.790898
AT3G52910	Growth regulating factor encoding transcription activator. One of the nine members of a GRF gene family, containing nuclear targeting domain. Involved in leaf development and expressed in root, shoot and flower.	-1.05931
AT3G53680	Acyl-CoA N-acyltransferase with RING/FYVE/PHD-type zinc finger domain-containing protein	-0.966899
AT3G55980	salt-inducible zinc finger 1	0.421437
AT3G56400	Member of WRKY Transcription Factor; Group III. Function as activator of SA-dependent defense genes and a repressor of JA-regulated genes. WRKY70-controlled suppression of JA-signaling is partly executed by NPR1.	1.29246
AT3G57800	basic helix-loop-helix (bHLH) DNA-binding superfamily protein	0.485027
AT3G60030	squamosa promoter-binding protein-like 12	0.450551
AT3G61890	Encodes a homeodomain leucine zipper class I (HD-Zip I) protein. Loss of function mutant has abnormally shaped leaves and stems.	1.50098
AT4G01120	bZIP (basic leucine zipper) transcription factor that binds to the G-box regulatory element found in many plant promoters. GBF2 nuclear localization is increased by blue light	0.592206
AT4G01250	AtWRKY22 is a member of WRKY Transcription Factor; Group II-e. It is involved in regulation of dark induced leaf senescence.	0.787715
AT4G01680	Encodes a putative transcription factor (MYB55).	1.13751
AT4G02640	Encodes a basic leucine zipper (bZIP) transcription factor AtbZIP10. AtbZIP10 shuttles between the nucleus and the cytoplasm. It binds consensus G- and C-box DNA sequences. AtbZIP10 acts antagonistically with LSD1 in both pathogen-induced hypersensitive response and basal defense responses.	0.6074
AT4G04890	Encodes a homeodomain protein that is expressed in the LI layer of the vegetative, floral and inflorescence meristems. Binds to the L1 box promoter element which is required in some proteins for L1 specific expression.	-0.841155
AT4G09460	Encodes myb6 DNA-binding protein. The mRNA is cell-to-cell mobile.	1.27448
AT4G09820	TT8 is a regulation factor that acts in a concerted action with TT1, PAP1 and TTG1 on the regulation of flavonoid pathways, namely proanthocyanidin and anthocyanin biosynthesis. Affects dihydroflavonol 4-reductase gene expression. It is thought that a ternary complex composed of TT2, TT8 and TTG1 is necessary for correct expression of BAN in seed endothelium. Also important for important for marg…	1.34579
AT4G14540	nuclear factor Y, subunit B3	0.830954
AT4G16141	GATA type zinc finger transcription factor family protein	-1.53759
AT4G17490	Encodes a member of the ERF (ethylene response factor) subfamily B-3 of ERF/AP2 transcription factor family (ATERF-6). The protein contains one AP2 domain. There are 18 members in this subfamily including ATERF-1, ATERF-2, AND ATERF-5. It is involved in the response to reactive oxygen species and light stress.	1.13456
AT4G17900	PLATZ transcription factor family protein	0.888
AT4G18390	TEOSINTE BRANCHED 1, cycloidea and PCF transcription factor 2	-1.20308
AT4G27410	Encodes a NAC transcription factor induced in response to desiccation. It is localized to the nucleus and acts as a transcriptional activator in ABA-mediated dehydration response.	0.903526
AT4G31550	member of WRKY Transcription Factor; Group II-d; negative regulator of basal resistance to Pseudomonas syringae.	0.593644
AT4G31920	Encodes an Arabidopsis response regulator (ARR) protein that acts in concert with other type-B ARRs in the cytokinin signaling pathway. Also involved in cytokinin-dependent inhibition of hypocotyl elongation and cytokinin-dependent greening and shooting in tissue culture. ARR1, ARR10, and ARR12 are redundant regulators of drought response, with ARR1 being the most critical. ARR1, ARR10 and ARR12 …	0.569146
AT4G34000	Encodes an ABA-responsive element-binding protein with similarity to transcription factors that is expressed in response to stress and abscisic acid.	0.72349
AT4G36780	BES1/BZR1 homolog 2	0.717286
AT4G36920	Encodes a floral homeotic gene, a member of the AP2/EREBP (ethylene responsive element binding protein) class of transcription factors and is involved in the specification of floral organ identity, establishment of floral meristem identity, suppression of floral meristem indeterminancy, and development of the ovule and seed coat. AP2 also has a role in controlling seed mass. Dominant negative all…	1.07212
AT4G36990	Encodes a protein whose sequence is similar to heat shock factors that regulate the expression of heat shock proteins. Transcript level is increased in response to heat shock. However, overexpression of this gene did not result in the increase of decrease of heat shock proteins.	1.05103
AT4G37260	Member of the R2R3 factor gene family. The mRNA is cell-to-cell mobile.	0.509128
AT4G37540	LOB domain-containing protein 39	-0.941278
AT4G38620	Encodes a R2R3 MYB protein which is involved in the response to UV-B. It functions as a repressor of target gene expression. One of its target genes encodes cinnamate 4-hydroxylase; mutants accumulate sinapate esters in their leaves. MYB4 binds to its own promoter and represses its own expression. Nuclear localization of MYB4 depends on the action of the beta importin SAD2. The mRNA is cell-to-ce…	0.813089
AT4G38900	Basic-leucine zipper (bZIP) transcription factor family protein	0.544982
AT5G05790	Duplicated homeodomain-like superfamily protein	0.766551
AT5G06550	Encodes a HR demethylase that acts as a positive regulator of seed germination in the PHYB-PIL5-SOM pathway.	-1.10444
AT5G06770	KHZ2 is a CCCH zinc-finger and KH domain protein belonging to the VII subfamily. It is expressed throughout the plant. Highly similar to KHZ1.Double mutants with khz1 are late flowering. Overexpression leads to increased rates of leaf senescence.	-0.756226
AT5G07580	encodes a member of the ERF (ethylene response factor) subfamily B-3 of ERF/AP2 transcription factor family. The protein contains one AP2 domain. There are 18 members in this subfamily including ATERF-1, ATERF-2, AND ATERF-5.	0.622627
AT5G08790	induced by wounding, belongs to a large family of putative transcriptional activators with NAC domain.	0.993295
AT5G09330	NAC domain containing protein 82	-0.507743
AT5G11060	A member of Class II KN1-like homeodomain transcription factors (together with KNAT3 and KNAT5), with greatest homology to the maize knox1 homeobox protein. Expression regulated by light. Detected in all tissues examined, but most prominent in leaves and young siliques. Transient expression of GFP translational fusion protein suggests bipartite localization in nucleus and cytoplasm. KNAT4 promote…	1.12472
AT5G11270	Encodes a homeodomain transcription factor involved in mediating resistance to infection by necrotrophic pathogens dependent on perception of jasmonic acid through COI1. Expressed in the nucleus. Downregulated upon fungal infection. Also involved in drought tolerance.	-0.633396
AT5G16540	Encodes a zinc finger protein.	0.916138
AT5G17810	Encodes a WUSCHEL-related homeobox gene family member with 65 amino acids in its homeodomain. Proteins in this family contain a sequence of eight residues (TLPLFPMH) downstream of the homeodomain called the WUS box. Together with WOX11, WOX12 is involved in de novo root organogenesis.	1.64072
AT5G18270	NAC domain containing protein 87	1.23508
AT5G18960	FAR1-related sequence 12	-0.50723
AT5G20730	Encodes an auxin-regulated transcriptional activator. Activates expression of IAA1 and IAA9 in the presence of auxin. Mutants affect blue light and gravitropic and auxin mediated growth responses. Together with AUX19, it is involved in the response to ethylene. In the arf7 arf19 double mutant, several auxin-responsive genes (e.g. IAA5, LBD16, LBD29 and LBD33) are no longer upregulated by auxin.	0.398994
AT5G24110	member of WRKY Transcription Factor; Group III	2.51905
AT5G24800	Encodes bZIP protein BZO2H2.	0.999838
AT5G39760	Functions together with TZP in co-regulation of the expression of blue-light dependent transcriptional regulators. Coassociates with and regulates the expression of light-regulated loci as well as transcriptional regulators to shape plant development in response to environmental stimuli with targets in RNA processing factors as well as proteins involved in salt stress and ABA signaling, in additi…	-1.2508
AT5G45420	The gene encodes a MYB transcription factor belons to R2R3-MYB family of transcription factors. Knock-down mutant analysis indicates its role in root hair elongation.	-0.878712
AT5G46710	PLATZ transcription factor family protein	-1.57265
AT5G47140	Encodes a member of the GATA factor family of zinc finger transcription factors.	0.893494
AT5G47220	Encodes a member of the ERF (ethylene response factor) subfamily B-3 of ERF/AP2 transcription factor family (ATERF-2). The protein contains one AP2 domain. Functions as activator of GCC box?dependent transcription. Positive regulator of JA-responsive defense genes and resistance to F. oxysporum and enhances JA inhibition of root elongation.	2.26773
AT5G47230	encodes a member of the ERF (ethylene response factor) subfamily B-3 of ERF/AP2 transcription factor family (ATERF-5). The protein contains one AP2 domain. There are 18 members in this subfamily including ATERF-1, ATERF-2, AND ATERF-5. The mRNA is cell-to-cell mobile.	1.73093
AT5G47390	Encodes a circadian-regulated transcription factor which specifically controls cell expansion during leaf development by controlling ROS homeostasis. The mRNA is cell-to-cell mobile.	0.43043
AT5G47640	nuclear factor Y, subunit B2	1.29844
AT5G48150	Member of GRAS gene family. Semi-dominant mutant has a reduced response to far-red light and appears to act early in the phytochrome A signaling pathway.	0.966625
AT5G52010	C2H2-like zinc finger protein	-0.717341
AT5G52510	SCARECROW-like 8	0.467085
AT5G57180	Transcription regulator responsible for specific upregulation of the translocon genes atToc33 and atToc75 in leaves. Involved in protein import into chloroplast.	-0.874124
AT5G60200	Encodes a Dof-type transcription factor. PEAR protein involved in the formation of a short-range concentration gradient that peaks at protophloem sieve elements, and activates gene expression that promotes radial growth. Locally promotes transcription of inhibitory HD-ZIP III genes, and thereby establishes a negative-feedback loop that forms a robust boundary that demarks the zone of cell divisio…	0.724311
AT5G61600	encodes a member of the ERF (ethylene response factor) subfamily B-3 of ERF/AP2 transcription factor family. The protein contains one AP2 domain. There are 18 members in this subfamily including ATERF-1, ATERF-2, AND ATERF-5.	0.733308
AT5G62020	member of Heat Stress Transcription Factor (Hsf) family The mRNA is cell-to-cell mobile.	0.696398
AT5G64220	CAMTA2 proteins bind to the AtALMT1 promoter at in vitro. The gene itself is Al inducible, and AtALMT1 expression is partially repressed in camta2 mutant. The mRNA is cell-to-cell mobile.	0.753873
AT5G64810	member of WRKY Transcription Factor; Group II-c. Involved in jasmonic acid inducible defense responses.	3.54678
AT5G65910	BSD domain-containing protein	0.885747
AT5G66730	C2H2-like zinc finger protein	0.555469
AT5G67300	Member of the R2R3 factor MYB gene family involved in mediating plant responses to a variety of abiotic stimiuli. The mRNA is cell-to-cell mobile.	0.598881
AT5G67450	Encodes zinc-finger protein. mRNA levels are elevated in response to low temperature, cold temperatures and high salt. The protein is localized to the nucleus and acts as a transcriptional repressor.	1.01077

## Sheet: Protein phosphorylation
Locus Identifier	Gene Model Description	log2(WT+T2 / WT mock) mRNA levels
AT1G01140	Encodes a CBL-interacting protein kinase with similarity to SOS2	0.595605
AT1G03740	Protein kinase superfamily protein	1.01663
AT1G06390	encodes a GSK3/shaggy-like protein kinase. Gene expression is induced by NaCl and ABA but not KCl, suggesting that this gene may be involved in response to osmotic stress. This protein can interact with the BZR1 protein involved in brassinosteroid-mediated signaling in a Y2H assay and promotes BZR1 phosphorylation in protoplasts.	-0.663983
AT1G09840	shaggy-like protein kinase 41	-0.620517
AT1G09970	RLK7 belongs to a leucine-rich repeat class of receptor-likekinase (LRR-RLKs). It is involved in the control of germination speed and the tolerance to oxidant stress. The mRNA is cell-to-cell mobile.	0.330247
AT1G12680	phosphoenolpyruvate carboxylase-related kinase 2	0.839296
AT1G14370	Encodes protein kinase APK2a. Protein is N-myristoylated.	1.23914
AT1G16150	Encodes a WAK-like receptor-like kinase with a cytoplasmic Ser/Thr protein kinase domain and an extracellular domain with EGF-like repeats. Likely involved in Arabidopsis root mineral responses to Zn2+, Cu2+, K+, Na+ and Ni+. The mRNA is cell-to-cell mobile.	1.46965
AT1G18150	Encodes mitogen-activated protein kinase 8 (MPK8). MPK8 connects protein phosphorylation, Ca2+, and ROS in the wound-signaling pathway.	-0.514472
AT1G18390	Serine/Threonine kinase family catalytic domain protein	1.14537
AT1G20650	Protein kinase superfamily protein	0.468906
AT1G21270	cytoplasmic serine/threonine protein kinase induced by salicylic acid. mutant plants exhibit a loss of cell expansion and dependence on sugars and salts for seedling growth, affecting the expression and activity of vacuolar invertase.	1.05413
AT1G25390	Protein kinase superfamily protein	0.651014
AT1G34420	leucine-rich repeat transmembrane protein kinase family protein	1.32201
AT1G48490	Protein kinase which together with IREH1 plays an important role in controlling root skewing and maintaining the microtubule network.	0.568671
AT1G53440	Leucine-rich repeat transmembrane protein kinase	0.736685
AT1G59580	encodes a mitogen-activated kinase involved in innate immunity The mRNA is cell-to-cell mobile.	0.547079
AT1G61360	S-locus lectin protein kinase family protein	1.4827
AT1G61640	Protein kinase superfamily protein	-1.20172
AT1G67580	Protein kinase superfamily protein	0.698553
AT1G68690	Encodes a member of the proline-rich extensin-like receptor kinase (PERK) family. This family consists of 15 predicted receptor kinases (PMID: 15653807).	1.04352
AT1G68830	STN7 protein kinase; required for state transitions, phosphorylation of the major antenna complex (LHCII) between PSII and PSI, and light adaptation. STN7 is involved in state transitions.	0.569371
AT1G70530	Encodes a cysteine-rich receptor-like protein kinase.	0.607911
AT1G72300	Encodes a leucine-rich repeat receptor kinase (LRR-RK) involved in the perception of PSY1. PSY1 is an 18-aa tyrosine-sulfated glycopeptide encoded by AT5G58650 that promotes cellular proliferation and expansion.	0.586463
AT1G79670	Encodes a receptor-like kinase that does not contain an extracellular leucine-rich repeat domain. A novel type of dominant disease-resistance protein that confers resistance to a broad spectrum of Fusarium races.	0.950181
AT2G01450	MPK17 Map kinase family member. Mutants have increased numbers of peroxisomes a phenotype that can be suppressed by mutations in PMD1. This and other treatments, suggests a function in control of peroxisome proliferation in salt stress.	0.580386
AT2G17290	Encodes calcium dependent protein kinase 6 (CPK6), a member of the Arabidopsis CDPK gene family. CDPKs contain an intrinsic Ca2+-activation domain with four EF hand Ca2+-binding sites. CDPKs protein kinases have been proposed to function in multiple plant signal transduction pathways downstream of [Ca2+]cyt elevations, thus transducing various physiological responses. CPK6 is expressed in both gu…	0.492023
AT2G17520	Encodes a endoribonuclease/protein kinase IRE1-like protein that is predicted to form a type I transmembrane protein structure and contain kinase/endoribonuclease domains at their C-terminal halves. The transcript levels for several ER-stress responsive genes, including six protein disulfide isomerases (PDIs), BiP2, and AtbZIP60 are not affected in ire1-2 null mutants. The mRNA is cell-to-cell mo…	0.575236
AT2G17930	Component of the SPT module of the SAGA complex.	0.368249
AT2G24360	STYK serine threonine kinase that phosphorylates several oil body proteins including OLE1 and CLO4/CAL4.	0.62679
AT2G24990	Serine/threonine-protein kinase Rio1	-1.78466
AT2G26980	encodes a serine-threonine protein kinase whose expression increases in response to abscisic acid, cold, drought, high salt, and wounding conditions. The gene is expressed in developing seeds and seedlings. Lines carrying a T-DNA insertions have reduced germination efficiency and expression of cold, high-salt, and abscisic acid marker genes are altered, but not drought-response markers.	-1.15586
AT2G29220	Concanavalin A-like lectin protein kinase family protein	5.05333
AT2G31800	Integrin-linked protein kinase family	0.629691
AT2G31880	Encodes a putative leucine rich repeat transmembrane protein that is expressed in response to Pseudomonas syringae. Expression of SRRLK may be required for silencing via lsiRNAs. Regulates cell death and innate immunity.	0.65654
AT2G35050	kinase superfamily with octicosapeptide/Phox/Bem1p domain-containing protein	0.425188
AT2G37710	Induced in response to Salicylic acid. The mRNA is cell-to-cell mobile.	0.475505
AT2G39190	member of ATH subfamily	0.430468
AT2G44680	Encodes casein kinase II beta chain, a CK2 regulatory subunit. Nuclear-localized CKB4 protein exists in vivo as different isoforms, resulting from phosphorylation on serine residues. The phosphorylated isoforms are the preferred substrate for ubiquitination and degradation by the proteasome pathway. Involved in regulation of circadian clock.	0.732062
AT2G47060	Encodes Pto-interacting 1-4 (PTI1-4), a member of the PTI1-like serine/threonine protein kinases that share strong sequence identity to the tomato PTI1 kinase.	0.559819
AT3G01300	Protein kinase superfamily protein	0.694413
AT3G03770	Leucine-rich repeat protein kinase family protein	-0.429775
AT3G05840	encodes a SHAGGY-like kinase involved in meristem organization.	0.343413
AT3G07070	Protein kinase superfamily protein	-1.8648
AT3G07700	ABC1K7 is a member of an atypical protein kinase family that is induced by salt stress. Loss of function mutations affect the metabolic profile of chloroplast lipids. It appears to function along with ABC1K8 in mediating lipid membrane changes in response to stress.	0.402669
AT3G08730	Encodes a protein-serine kinase that phosphorylates ribosomal protein in vitro. Activation of AtS6k is regulated by 1-naphthylacetic acid and kinetin, at least in part, via a lipid kinase-dependent pathway. Involved in translational up-regulation of ribosomal proteins. Phosphorylated by PDK1. Interacts with RAPTOR1, which in turn interacts with TOR. SPK6 activity is affected by osmotic stress, an…	-0.736369
AT3G08760	Encodes an osmotic stress-inducible kinase that functions as a negative regulator of osmotic stress signaling in plants.	0.769475
AT3G14840	Encodes LRR-RLK protein that is localized to the plasma membrane and is involved in regulation of plant innate immunity to microbes. LIK1 is phosphorylated by CERK1, a kinase involved in chitin perception. The mRNA is cell-to-cell mobile.	0.523166
AT3G17410	Positively regulates ABA-mediated physiological responses via phosphorylation on RCAR3/ RCAR11.	0.548432
AT3G19300	Protein kinase superfamily protein	-1.71813
AT3G20410	calmodulin-domain protein kinase CDPK isoform 9 (CPK9)	-0.850805
AT3G21340	Leucine-rich repeat protein kinase family protein	-1.91551
AT3G22420	Encodes a member of the WNK family (9 members in all) of protein kinases, the structural design of which is clearly distinct from those of other known protein kinases, such as receptor-like kinases and mitogen-activated protein kinases. Its transcription is under the control of circadian rhythms.	0.722389
AT3G23310	AGC (cAMP-dependent, cGMP-dependent and protein kinase C) kinase family protein	0.53201
AT3G24190	Protein kinase superfamily protein	0.365312
AT3G25250	Arabidopsis protein kinase The mRNA is cell-to-cell mobile.	2.66083
AT3G25560	NSP-interacting kinase 2	0.780913
AT3G28450	Leucine-rich repeat protein kinase family protein	0.573429
AT3G28690	Protein kinase superfamily protein	0.609906
AT3G45640	Encodes a mitogen-activated kinase whose mRNA levels increase in response to touch, cold, salinity stress and chitin oligomers.Also functions in ovule development. Heterozygous MPK3 mutants in a homozygous MPK6 background are female sterile due to defects in integument development. MPK3 can be dephosphorylated by MKP2 in vitro. The mRNA is cell-to-cell mobile.	0.701755
AT3G49060	U-box domain-containing protein kinase family protein	0.645537
AT3G51270	protein serine/threonine kinase	-0.834363
AT3G53030	Encodes a protein kinase SRPK4 that specifically targets Arabidopsis Ser/Arg-rich (SR) slicing factors involved in RNA metabolism. In vitro kinase assay showed that SRPK4 phosphorylates the SR protein RSp31.	0.725081
AT3G56370	Leucine-rich repeat protein kinase family protein	-0.736539
AT3G57530	Calcium-dependent Protein Kinase. ABA signaling component that regulates the ABA-responsive gene expression via ABF4. AtCPK32 has autophosphorylation activity and can phosphorylate ABF4 in vitro	0.367635
AT3G58640	Mitogen activated protein kinase kinase kinase-like protein	0.499277
AT3G59110	Protein kinase superfamily protein	0.470256
AT3G63280	Encodes AtNek4, a member of the NIMA-related serine/threonine kinases (Neks) that have been linked to cell-cycle regulation in fungi and mammals. Plant Neks might be involved in plant development processes.	1.06234
AT4G01370	Encodes a nuclear and cytoplasmically localized MAP kinase involved in mediating responses to pathogens. Its substrates include MKS1 and probably MAP65-1.The MAP65-1 interaction is involved in mediating cortical microtuble organization. Required for male-specific meiotic cytokinesis. The mRNA is cell-to-cell mobile.	-0.502669
AT4G02010	Protein kinase superfamily protein	-0.851771
AT4G05200	Encodes a cysteine-rich receptor-like protein kinase.	1.00574
AT4G08850	MIK1 encodes a receptor kinase that forms a complex with MDIS1/MIK2 and binds LURE1, the female pollen guidance chemi-attractant. MIK1 phosphorylates MDIS1 and is autophosphorylated.	0.563435
AT4G11460	Encodes a cysteine-rich receptor-like protein kinase.	-0.855477
AT4G14580	CBL-interacting protein kinase	1.27374
AT4G18250	receptor Serine/Threonine kinase-like protein	2.5508
AT4G20140	Encodes GASSHO1 (GSO1), a putative leucine-rich repeat transmembrane-type receptor kinase. GSO1 and a homolog GSO2 (At5g44700) are required for the formation of a normal epidermal surface during embryogenesis. Necessary for localizing CASPARIAN STRIP DOMAIN PROTEINS (CASPs) - major players of endodermal differentiation - into an uninterrupted, ring-like domain.	0.638138
AT4G21390	S-locus lectin protein kinase family protein	1.05504
AT4G22130	STRUBBELIG-receptor family 8	-0.590336
AT4G23190	Encodes putative receptor-like protein kinase that is induced by the soil-borne vascular bacteria, Ralstonia solanacearum. Naming convention from Chen et al 2003 (PMID 14756307)	1.13521
AT4G23270	Encodes a cysteine-rich receptor-like protein kinase. The mRNA is cell-to-cell mobile.	0.998641
AT4G28350	Concanavalin A-like lectin protein kinase family protein	1.97719
AT4G28880	Member of CKL gene family (CKL-A group)	0.41457
AT4G30960	Encodes CBL-interacting protein kinase 6 (CIPK6). Required for development and salt tolerance. The mRNA is cell-to-cell mobile.	1.11369
AT4G31170	Protein kinase superfamily protein	0.377397
AT4G35780	ACT-like protein tyrosine kinase family protein	0.578111
AT5G01810	Encodes a CBL-interacting serine/threonine protein kinase, also has similarities to SOS2 kinase.	0.999874
AT5G01950	Leucine-rich repeat protein kinase family protein	0.671973
AT5G07180	Encodes a receptor-like kinase that, together with ER and ERL1 governs the initial decision of protodermal cells to either divide proliferatively to produce pavement cells or divide asymmetrically to generate stomatal complexes. It is also important for maintaining stomatal stem cell activity and preventing terminal differentiation of the meristemoid into the guard mother cell. When heterozygous …	-0.704332
AT5G09890	Protein kinase family protein	-0.455435
AT5G14640	shaggy-like kinase 13	0.49337
AT5G16590	Leucine-rich repeat protein kinase family protein	-0.609113
AT5G25930	kinase family with leucine-rich repeat domain-containing protein	1.47373
AT5G38990	Involved in growth adaptation upon exposure to metal ions. Contributes together with the other MDS genes to the complex network of CrRLK1Ls that positively and negatively affect growth.	0.743956
AT5G40820	Encodes a Arabidopsis ortholog of the ATR protein kinase that is involved in a wide range of responses to DNA damage and plays a central role in cell-cycle regulation. Dominant loss of function alleles identified as suppressors of ALS also exhibit increased tolerance to aluminum. This may be due to the inhibition of terminal differentiation of the root apex upon exposure to Al.	-0.951128
AT5G41990	Encodes a member of the WNK family (9 members in all) of protein kinases, the structural design of which is clearly distinct from those of other known protein kinases, such as receptor-like kinases and mitogen-activated protein kinases. Interacts specifically with and phosphorylates AtVHA-C, subunit C of the vacuolar H+-ATPase.	0.51529
AT5G44290	Protein kinase superfamily protein	0.484608
AT5G58350	Encodes a member of the WNK family (9 members in all) of protein kinases, the structural design of which is clearly distinct from those of other known protein kinases, such as receptor-like kinases and mitogen-activated protein kinases. Its transcription is under the control of circadian rhythms.	1.48342
AT5G60280	Plasma membrane localized receptor kinase. Binds NAD+ and induces expression of disease resistance genes.	1.19533
AT5G61560	U-box domain-containing protein kinase family protein	1.32557
AT5G63410	Leucine-rich repeat protein kinase family protein	0.611575

## Sheet: Protein translocation
Locus Identifier	Gene Model Description	log2(WT+T2 / WT mock) mRNA levels
AT1G02280	Encodes a GTP-binding GTP-ase. Component of the chloroplast protein import machinery. Required for import of POR B into plastids. Toc33 phosphorylation may not play an important role in vivo.	-1.22128
AT1G04945	HIT-type Zinc finger family protein	-1.40724
AT1G06950	Encodes a protein thought to be a part of the translocon at the chloroplast inner envelope. Involved in protein import into the chloroplast and chloroplast biogenesis. C-terminal half of Tic110 functions as scaffolds for protein-protein interactions.	-0.522371
AT1G07140	Encodes a putative Ran-binding protein (siRanBP).	-0.904241
AT1G09270	Protein interacts with Agrobacterium proteins VirD2 and VirE2.	-0.427401
AT1G10390	DRA2 is a homolog of mammalian nucleoporin 98 and a likely component of the nuclear pore complex in Arabidopsis. It positively participates in the control of the hypocotyl elongation response to plant proximity and control of shade induced gene expression. Nucleoportin which redundantly inhibits flowering together with Nup98b through multiple pathways including clock, photoperiod, and age pathway…	-0.413755
AT1G17530	Encodes a translocase of inner mitochondrial membrane.	0.904693
AT1G27390	Form of TOM20, which is a component of the TOM complex, involved in transport of nuclear-encoded mitochondrial proteins	-0.885323
AT1G29310	SecY protein transport family protein	-1.11274
AT1G49410	translocase of the outer mitochondrial membrane 6	-0.82156
AT1G52380	NUP50 (Nucleoporin 50 kDa) protein	-0.833393
AT1G55900	component of a translocase in the mitochondrial inner membrane	-0.989744
AT1G61570	Encodes a putative small zinc finger-like protein (TIM13); nucleus-encoded gene whose product is found in the mitochondrial inner membrane space.	-1.41078
AT1G67680	SRP72 RNA-binding domain-containing protein	-0.593898
AT1G72750	translocase inner membrane subunit 23-2	-1.20854
AT1G73240	nucleoporin protein Ndc1-Nup protein	-1.19438
AT1G79940	J domain protein localized in ER membrane. Mutants have defective pollen germination.	-0.474333
AT1G80920	A nuclear encoded soluble protein found in the chloroplast stroma. Negatively regulated by light and has rapid turnover in darkness.	1.16647
AT2G29530	Encodes a small zinc finger-like protein that is a component of the mitochondrial protein import apparatus. Together with AtTIM9, AtTIM10 is non-redundantly essential for maintaining mitochondrial function of early embryo proper cells and endosperm free-nuclei.	-1.29218
AT2G30060	Pleckstrin homology (PH) domain superfamily protein	-0.681395
AT2G31660	SAD2 (super sensitive to ABA and drought 2) encodes an importin beta-domain family protein likely to be involved in nuclear transport in ABA signaling. Subcellular localization of GFP-tagged SAD2 showed a predominantly nuclear localization, consistent with a role for SAD2 in nuclear transport. Mutation of SAD2 in Arabidopsis alters abscisic acid sensitivity. SAD2 was ubiquitously expressed at low…	-0.961795
AT2G34250	SecY protein transport family protein	-0.724535
AT2G36070	One of two genes in Arabidopsis that encode a putative subunit of the mitochondrial inner membrane translocase complex. TIM44 subunit is thought to provide the energy for translocation via hydrolysis of ATP.	-0.80335
AT2G37410	Mitochondrial inner membrane translocase. Together with AtTIM17-1, TIM17-2 has a long C-terminal extension not present in other TIMs. The extension is located in the outer membrane and so TIM17-2 links the inner and outer mitochondrial membranes. The C-terminal region is essential for protein import into mitochondria via the general import pathway but is not necessary for import via the carrier p…	-0.399764
AT2G39810	A novel protein with a RING finger motif near the amino terminus. Negative regulator of cold responses. Functions as an E3 ligase required for the ubiquitination of ICE1. HOS1 physically interacts with ICE1 and mediates the ubiquitination of ICE1 both in vitro and in vivo. Overexpression represses the expression of CBFs and their downstream genes and confers increased sensitivity to freezing stre…	-0.729047
AT2G42210	Homologous to pea OEP16 and barley pPORA (OEP16), a member of Arabidopsis OEP16 family.	-0.443068
AT2G43640	Signal recognition particle, SRP9/SRP14 subunit	-0.924502
AT2G46520	cellular apoptosis susceptibility protein, putative / importin-alpha re-exporter	-0.993519
AT3G06720	Encodes importin alpha involved in nuclear import. Protein interacts with Agrobacterium proteins VirD2 and VirE2. Is not individually essential for Agrobacterium-mediated root transformation, but when overexpressed can rescue the impa-4 decreased transformation susceptibility phenotype.	-0.692761
AT3G08943	ARM repeat superfamily protein	-1.29657
AT3G08960	ARM repeat superfamily protein	-0.700528
AT3G10650	Encodes a nucleoporin involved in mRNA export from the nucleus. It is also involved in the regulation of nuclear morphology.	-0.729402
AT3G11070	Outer membrane OMP85 family protein	-0.85647
AT3G17340	ARM repeat superfamily protein	-0.787801
AT3G17970	Integral chloroplast outer membrane protein. Belongs to one of the 36 carboxylate clamp (CC)-tetratricopeptide repeat (TPR) proteins (Prasad 2010, Pubmed ID: 20856808) with potential to interact with Hsp90/Hsp70 as co-chaperones.	-0.925862
AT3G20000	Encodes a component of the TOM receptor complex responsible for the recognition and translocation of cytosolically synthesized mitochondrial preproteins. With TOM22, functions as the transit peptide receptor at the surface of the mitochondrial outer membrane and facilitates the movement of preproteins into the translocation pore. The mRNA is cell-to-cell mobile.	-1.08943
AT3G27080	Component of the TOM complex involved in transport of nuclear-encoded mitochondrial proteins	-1.24743
AT3G46560	Encodes a small zinc finger-like protein that is a component of the mitochondrial protein import apparatus. Together with AtTIM10, AtTIM9 is non-redundantly essential for maintaining mitochondrial function of early embryo proper cells and endosperm free-nuclei.	-1.03343
AT3G46740	Component of the translocon outer membrane (TOC) complex. Forms the outer envelope translocation channel (beta-barrel). Plays a role in preprotein conductance. Imported into chloroplast. Expressed in young dividing photosynthetic tissues. Knockout mutants are embryo lethal with arrested development at the two-cell stage. Knockout mutants have abnormal etioplasts.	-0.935746
AT3G57350	Nucleoporin interacting component (Nup93/Nic96-like) family protein	-0.8292
AT3G59020	ARM repeat superfamily protein	-0.782237
AT4G00026	Encodes SD3 (Segregation Distortion 3), a protein with high similarity to yeast translocase on the inner mitochondrial membrane 21 (TIM21). sd3 mutants show seedling-lethal phenotype in light-grown seedlings and shorter hypocotyls in dark-grown seedlings. SD3 overexpression plants show increase in cell number and cell size, as well as elevated ATP level.	-1.28265
AT4G02510	An integral membrane GTPase that functions as a transit-sequence receptor required for the import of proteins necessary for chloroplast biogenesis. Located in the outer chloroplast membrane. Phosphorylation of the G-domains regulate translocon assembly. The mRNA is cell-to-cell mobile.	-0.63492
AT4G21180	J domain protein localized in ER membrane.	-1.03206
AT4G27640	ARM repeat superfamily protein	-0.87849
AT4G30620	Homolog of STIC2, recent duplication.	-1.22268
AT4G30840	Transducin/WD40 repeat-like superfamily protein	-1.20203
AT4G32250	Encodes a component of the TOC machinery that phosphorylates import receptors, supports pre-protein import, and contributes to efficient chloroplast biogenesis.	0.898771
AT5G03070	Putative importin alpha isoform. When overexpressed can rescue the impa-4 decreased transformation susceptibility phenotype.	-1.12927
AT5G05000	Outer membrane GTPase protein that may function in import of nuclear encoded proteins into the chloroplast. Phosphorylation of the G-domains regulate translocon assembly.	-0.936671
AT5G16620	chloroplast protein import (Tic40)	-0.893404
AT5G17020	Encodes a member of the exportin protein family (XPO1A) which functions as receptors for nuclear export. Binds to a variety of proteins having leucine rich export signals.Along with XPO1B involved with development of the male and female gametophytes.	-0.668708
AT5G19820	Encodes an importin that transports HYL1, a component of the microprocessor, from the cytoplasm to the nucleus to constitute functional microprocessor, thereby affecting miRNA processing. Knockdown amiR mutants significantly reduced nuclear portion of HYL1 protein and correspondingly compromised the pri-miRNA processing in the nucleus.	-0.967093
AT5G20010	A member of RAN GTPase gene family. Encodes a small soluble GTP-binding protein. Likely to be involved in nuclear translocation of proteins. May also be involved in cell cycle progression. The mRNA is cell-to-cell mobile.	-0.354443
AT5G20020	A member of RAN GTPase gene family. Encodes a small soluble GTP-binding protein. Likely to be involved in nuclear translocation of proteins. May also be involved in cell cycle progression.	-0.72056
AT5G22640	EMB1211 is a MORN (multiple membrane occupation and recognition nexus) motif containing protein involved in embryo development and chloroplast biogenesis. The mRNA is cell-to-cell mobile.	-0.556089
AT5G40480	embryo defective 3012	-0.578677
AT5G43970	Subunit of the TOM complex, a translocase in the outer mitochondrial membrane that selectively allows proteins with a mitochondrial targeting sequence to enter the mitochondrion.	-1.09743
AT5G50460	secE/sec61-gamma protein transport protein	-1.14292
AT5G50810	Encodes a small zinc finger-like protein that is a component of the mitochondrial protein import apparatus.	-0.767445
AT5G53480	ARM repeat superfamily protein	-0.572645
AT5G62050	essential factor for protein sorting and assembly into membranes	-1.33557
AT5G63220	golgi-to-ER traffic-like protein	-0.885386

## Sheet: RNA processing
Locus Identifier	Gene Model Description	log2(WT+T2 / WT mock) mRNA levels
AT1G02080	Acts as scaffold protein in the CCR4-NOT complex, by interacting with various NOT proteins and CAF1.	0.334915
AT1G02140	Encodes a homologue of the exon junction complex (EJC) component MAGO that participates in intron-mediated enhancement of gene expression.	-0.823458
AT1G03360	Encodes a core subunit of the RNA exosome required for the processing of rRNA, several snoRNA and the degradation of aberrant transcripts.	-0.921796
AT1G03530	nuclear assembly factor 1	-1.43063
AT1G04510	Encodes MAC3A, a U-box proteins with homology to the yeast and human E3 ubiquitin ligase Prp19. Associated with the MOS4-Associated Complex (MAC). Involved in plant innate immunity.	-0.887502
AT1G06220	Encodes a protein with similarity to splicing factor Snu114. Snu114 is thought to be involved in activation of the splicosome. Loss of GFA1 function results in reduced female fertility. Approximately 50% of ovules abort due to defects in the female gametophyte. In mutant gametophytes antipodal cells express egg cell markers suggesting a defect in specification of cell fate.GFA1 is also required t…	-0.472622
AT1G11430	Encodes a protein involved in RNA editing in chloroplasts. The mRNA is cell-to-cell mobile.	-0.940348
AT1G14410	Encodes a homolog of the potato p24 protein. Binds single strand telomeric repeats. Negatively regulates telomerase activity and telomere length.	-1.08659
AT1G20220	Alba DNA/RNA-binding protein	-0.584976
AT1G20370	Pseudouridine synthase family protein	-1.08649
AT1G20410	Pseudouridine synthase family protein	-1.03878
AT1G20580	Small nuclear ribonucleoprotein family protein	-0.520258
AT1G22270	Encodes SMO2 (Small Organ 2). Modulates progression of cell division during organ growth.	-0.695767
AT1G27650	U2 auxiliary factor small subunit. The atU2AF35a protein and its homolog, atU2AF35b, contain most of the conserved domains of hsU2AF35, including the psiRRM, one RS domain, two zinc fingers, and the two regions for interacting with U2AF large subunit. Both proteins lack the stretch of glycines present in human U2AF35. The sequences are overall 83% identical, and each Arabidopsis homolog shows app…	-0.63345
AT1G36310	S-adenosyl-L-methionine-dependent methyltransferases superfamily protein	-0.63259
AT1G51510	This gene is predicted to encode a protein involved in the exon junction complex. Though there is a predicted RNA binding motif, in the Drosophila ortholog (33% identity), this motif mediates interactions with Mago and is not available for RNA binding. The Arabidopsis Y14 protein appears to be predominantly nucleolar, but there is also some evidence for its presence in the cytoplasm.	-0.712203
AT1G52160	Encodes a tRNase Z.	-1.23456
AT1G55870	Encodes a poly(A)-specific ribonuclease, AtPARN. Expression of AtPARN is upregulated by ABA or stress treatment. Mutant is hypersensitivity to salicylic acid as well as ABA. Functions with AGS1 to regulate the poly(A) status of mitochondrial mRNA.	-0.944959
AT1G56110	NOP56-like protein	-1.50697
AT1G59760	Encodes MTR4, a putative RNA helicase and exosome co-factor. Required for proper rRNA biogenesis and development.	-0.788957
AT1G60080	3-5-exoribonuclease family protein	-1.38709
AT1G70200	Encodes a RNA-Binding Protein RBD1. Promotes chilling tolerance through 23S rRNA processing.	-0.565574
AT1G71260	Encodes WHY2, a homolog of the potato p24 protein. It shares the conserved KGKAAL domain, a putative DNA-binding domain, with potato p24 and is localized to mitochondria and not the nucleus. WHY2 is a member of the Whirly family proteins present mainly in the plant kingdom performing various activities related to DNA metabolism. Crystal structure of Solanum tuberosum WHY2, a close homolog of Arab…	-1.25024
AT1G76010	Alba DNA/RNA-binding protein	-0.382435
AT1G76120	Pseudouridine synthase family protein	-1.44406
AT2G02740	Encodes a homolog of the potato p24 protein. It shares the conserved KGKAAL domain, a putative DNA-binding domain, with potato p24 and is localized to the plastid and not the nucleus.	-1.23204
AT2G18510	RNA-binding (RRM/RBD/RNP motifs) family protein	-1.21628
AT2G23930	Putative small nuclear ribonucleoprotein G	-0.853771
AT2G25580	Tetratricopeptide repeat (TPR)-like superfamily protein	-0.981104
AT2G29580	Encodes MAC5B, homologous to MAC5A. MAC5A is a component of the MOS4-associated complex (MAC) that contributes to snc1- mediated autoimmunity. Homologues include AT1G07360 (MAC5A), AT2G29580 (MAC5B) and AT5G07060 (MAC5C).	-1.13471
AT2G47420	Encodes a putative rRNA dimethyltransferase.	-1.2239
AT3G01370	Encodes a protein containing a CRM domain that is involved in group I and group II intron splicing.	0.389521
AT3G02320	N2,N2-dimethylguanosine tRNA methyltransferase	-0.929452
AT3G03920	H/ACA ribonucleoprotein complex, subunit Gar1/Naf1 protein	-0.550581
AT3G04680	Encodes a nuclear protein that functions in mRNA processing. Mutations in this gene cause embryo lethality and reduced transmission through the female gametophyte. Over-expression of a CLPS3:TAP protein changes the relative levels of two alternatively processed FCA transcripts. It also causes abnormal phyllotaxy and flower development, early flowering under long and short days, and increased leve…	-0.996713
AT3G05060	SAR DNA-binding protein, putative, strong similarity to SAR DNA-binding protein-1 (Pisum sativum) GI:3132696; contains Pfam profile PF01798: Putative snoRNA binding domain; encodes NOP58-like protein	-1.74189
AT3G05760	C2H2 and C2HC zinc fingers superfamily protein	-0.842291
AT3G12860	NOP56-like pre RNA processing ribonucleoprotein	-1.67051
AT3G13300	Encodes VCS (VARICOSE). Involved in mRNA decapping. VCS forms a mRNA decapping complex with DCP1 (At1g08370) and DCP2 (At5g13570). Unlike DCP2, VCS itself does not have mRNA decapping activity in vitro. DCP1, DCP2 and VCS colocalize in cytoplasmic loci, which are putative Arabidopsis mRNA processing bodies. Null mutants of DCP1, DCP2, and VCS accumulate capped mRNAs with a reduced degradation rat…	-0.332953
AT3G18165	Encodes MOS4 (Modifier of snc1, 4), a nuclear protein homologous to human Breast Cancer-Amplified Sequence (BCAS2). MOS4 interacts with AtCDC5 and PRL1. All three proteins are essential for plant innate immunity.	-0.85403
AT3G19440	Pseudouridine synthase family protein	-2.73977
AT3G19760	Encodes an RNA helicase that may be a component of the Exon Junction Complex. Subcellular localization is modulated by stress. Under normal conditions it is localized to the nuceloplasm but under hyopoxic conditions it localizes to the nucleolus and splicing speckles.	-0.465713
AT3G22150	Involved in RNA editing of plastid atpF and mitochondrial nad5.	-0.716861
AT3G22310	Sequence similarity ot DEAD-box RNA helicases. Binds RNA and DNA. Involved in drought, salt and cold stress responses. The mRNA is cell-to-cell mobile.	-1.25848
AT3G23830	encodes a glycine-rich RNA binding protein. Gene expression is induced by cold and reduced by ionic (salt) and non-ionic (mannitol) osmotic stress. Lines overexpressing the gene are slightly more tolerant to osmotic stress during germination.	-0.799923
AT3G26780	Encodes MEF14 (mitochondrial editing factor 14), a PPR (pentatricopeptide repeat proteins) protein required for RNA editing at site matR-1895 in mitochondria. The mRNA is cell-to-cell mobile.	-0.502913
AT3G53110	Encodes a putative DEAD-Box RNA Helicase and has RNA-dependent ATPase activity. Mutant is Sensitive to chilling stress and heat stress. Germination of the mutant is inhibited by ABA. LOS4 may be involved in temperature sensing. Is enriched in the nuclear envelope and also located in the cytoplasm. LOS4 is involved in export of poly A RNA. The mRNA is cell-to-cell mobile.	-0.477936
AT3G57150	Encodes a putative pseudouridine synthase (NAP57).	-1.58754
AT3G58560	Encodes a protein that is involved in mRNA processing and localized to cytoplasmic p-bodies. Double mutants with CCR4b show decreased sensitivity to high concentrations of sucrose. Involved in starch and sucrose metabolism.	-0.525976
AT3G58580	Encodes a protein that is involved in mRNA processing and localized to cytoplasmic p-bodies. Double mutants with CCR4a show decreased sensitivity to high concentrations of sucrose. Involved in starch and sucrose metabolism.	-0.595694
AT3G61620	exonuclease RRP41 (RRP41)	-1.29743
AT3G61860	encodes an arginine/serine-rich splicing factor. transcript is alternatively spliced and is differentially expressed in different tissues (flowers, roots, stems, and leaves) examined. Barta et al (2010) have proposed a nomenclature for Serine/Arginine-Rich Protein Splicing Factors (SR proteins): Plant Cell. 2010, 22:2926.	-0.653844
AT3G62840	Small nuclear ribonucleoprotein family protein	-0.650297
AT4G09980	Encodes a member of a core set of mRNA m6A writer proteins and is required for N6-adenosine methylation of mRNA.	-0.916615
AT4G10760	Encodes a member of a core set of mRNA m6A writer proteins and is required for N6-adenosine methylation of mRNA.	-0.596528
AT4G12600	Ribosomal protein L7Ae/L30e/S12e/Gadd45 family protein	-2.01249
AT4G14510	Encodes a CRM domain protein CFM3b. Homolog of CFM3a (AT3G23070). CFM3a is shown to function in the splicing of group IIB introns in chloroplasts.	-0.942709
AT4G20440	small nuclear ribonucleoprotein associated protein B	-1.09843
AT4G22285	Ubiquitin C-terminal hydrolases superfamily protein	-1.01798
AT4G25550	Cleavage/polyadenylation specificity factor, 25kDa subunit	-0.793195
AT4G25630	encodes a fibrillarin, a key nucleolar protein in eukaryotes which associates with box C/D small nucleolar RNAs (snoRNAs) directing 2'-O-ribose methylation of the rRNA. This gene also encodes a novel box C/D snoRNA, U60.2f in its fifth intron that accumulates in seedlings and that their targeted residue on the 25 S rRNA is methylated. The mRNA is cell-to-cell mobile.	-2.42492
AT4G37010	Encodes a member of the Centrin family. Mutants are hypersensitive to UV and prone to UV induced DNA damage. Based on sequence similarity and mutant phenotype CEN2 is thought to be involved in nucelotide excision repair/DNA repair.	0.925204
AT4G39680	SAP domain-containing protein	-0.540886
AT5G01400	Encodes a Symplekin/Pta1 homologue which would have the potential to interact with either ESP1 or AtCstF64.	-0.568382
AT5G02530	RNA-binding (RRM/RBD/RNP motifs) family protein	-0.761792
AT5G07350	RNA binding protein with nuclease activity essential for stress response. Involved in mechanisms acting on mRNAs entering the secretory pathway. Functionally redundant with TSN2.	-0.608242
AT5G08180	Ribosomal protein L7Ae/L30e/S12e/Gadd45 family protein	-1.19734
AT5G11170	One of two genes encoding an ATP-dependent RNA helicase that localizes predominantly to euchromatic regions of Arabidopsis nuclei, and associates with genes transcribed by RNA polymerase II independently from the presence of introns. It is not detected at non-transcribed loci. It interacts with ssRNA, dsRNA and dsDNA, but not with ssDNA. Its ATPase activity is stimulated by RNA and dsDNA and its …	-0.536603
AT5G11200	One of two genes encoding an ATP-dependent RNA helicase that localizes predominantly to euchromatic regions of Arabidopsis nuclei, and associates with genes transcribed by RNA polymerase II independently from the presence of introns. It is not detected at non-transcribed loci. It interacts with ssRNA, dsRNA and dsDNA, but not with ssDNA. Its ATPase activity is stimulated by RNA and dsDNA and its …	-0.682546
AT5G13010	Encodes a nuclear localized DEAH-box containing protein that is involved in miRNA biogenesis. Loss of function mutants are embryo lethal. Gene silencing experiments demonstrated its role in the localization of DCL-1 and HYL1 to the nuclear D-body. In silenced lines, miRNA production is suppressed and plants have developmental abnormalities and are hypersensitive to fungal pathogens.	0.442038
AT5G13570	Encodes DCP2 with mRNA decapping activity. DCP2 forms a mRNA decapping complex with DCP1 (At1g08370) and VCS (VARICOSE) (At3g13300). Recombinant DCP2 is enzymatically active in vitro, generating from capped mRNAs m7GDP, and 5?-phosphorylated mRNAs. DCP1, DCP2 and VCS colocalize in cytoplasmic loci, which are putative Arabidopsis mRNA processing bodies. Null mutants of DCP1, DCP2, and VCS accumula…	0.661905
AT5G15810	tRNA (guanine(26)-N(2))-dimethyltransferase	-1.4556
AT5G20160	Ribosomal protein L7Ae/L30e/S12e/Gadd45 family protein	-1.80552
AT5G26742	DEAD box RNA helicase (RH3)	-0.940368
AT5G27120	SAR DNA-binding protein, putative, strong similarity to SAR DNA-binding protein-1 (Pisum sativum) GI:3132696; contains Pfam profile PF01798: Putative snoRNA binding domain; has similarity to MAR binding NOP58 protein The mRNA is cell-to-cell mobile.	-1.92825
AT5G28740	Tetratricopeptide repeat (TPR)-like superfamily protein	-0.554283
AT5G35910	Encodes a nuclear-localized RRP6-like protein whose mutation leads to accumulation of an rRNA maturation by-product.	-0.647178
AT5G37720	Encodes a member of a family of proteins involved in export of RNAs from the nucleus and transcriptional coactivation.	1.04218
AT5G41770	crooked neck protein, putative / cell cycle protein	-0.566904
AT5G47680	Encodes a protein involved in modification of nucleosides in tRNA. Mutants have 50% less 1-methylguanosine than wt counterparts.	-0.686611
AT5G52470	Encodes a fibrillarin, a key nucleolar protein in eukaryotes which associates with box C/D small nucleolar RNAs (snoRNAs) directing 2'-O-ribose methylation of the rRNA. This gene also encodes a novel box C/D snoRNA, U60.1f in its fifth intron that accumulates in seedlings and that their targeted residue on the 25 S rRNA is methylated.	-0.738654
AT5G54890	RNA-binding CRS1 / YhbY (CRM) domain-containing protein	1.25044
AT5G57280	Gene encodes a methyltransferase-like protein involved in pre-rRNA processing.	-1.96757
AT5G57370	U4/U6.U5 small nuclear ribonucleoprotein	-0.797834
AT5G60590	DHBP synthase RibB-like alpha/beta domain-containing protein	-1.49171
AT5G61780	Involved in the regulation of AtGA20ox3 expression, as well as seed germination. The mRNA is cell-to-cell mobile.	-0.813817

[truncated: 2 more sheets: Protein biosynthesis, Cell wall proteins]
