# Supplementary material for: Parallel global profiling of plant TOR dynamics reveals a conserved role for LARP1 in translation
Source: eLife. 2020 Oct 15;9:e58795. doi: 10.7554/eLife.58795 (PMC7584452; doi:10.7554/eLife.58795)
Supplement: Supplementary file 3. — Table presents the fold-change in translation efficiency levels of the genes from the different categories, as determined by Mapman analysis. These data are represented as a box-whisker plot in Figure 1D. [file elife-58795-supp3.xlsx]

## Sheet: Cytosolic RPs
Locus Identifier	Gene Model Description	log2(WT+T2/WT mock) translation efficiency
AT1G07770	Encodes cytoplasmic ribosomal protein S15a.	-1.41504
AT1G15250	Zinc-binding ribosomal protein family protein	-0.716752
AT1G15440	Encodes a nucleolar protein that is a ribosome biogenesis co-factor. Mutants display aberrant RNA processing and female gametophyte development.	-1.11704
AT1G15930	Ribosomal protein L7Ae/L30e/S12e/Gadd45 family protein	-0.874469
AT1G52980	Encodes a GTPase that belongs to the subfamily of YlqF/YawG GTPases. Functions in Pre-60S ribosomal subunit maturation. The mRNA is cell-to-cell mobile.	-0.655352
AT1G63980	D111/G-patch domain-containing protein	-1.25154
AT1G69620	putative 60S ribosomal protein L34 The mRNA is cell-to-cell mobile.	-0.59561
AT2G19740	Ribosomal protein L31e family protein	-0.597902
AT2G33370	Ribosomal protein L14p/L23e family protein	-0.784732
AT2G36160	Ribosomal protein S11 family protein	-0.777608
AT2G37190	Ribosomal protein L11 family protein	-0.625934
AT2G40360	Encodes BOP1, an ortholog of Block of cell proliferation (BOP) protein. A T-DNA null allele of the BOP1 gene is lethal, and a 50% decrease in transcript accumulation is sufficient to cause severe developmental defects linked to defective cell division.	-0.755763
AT2G41840	Ribosomal protein S5 family protein	-0.863365
AT2G44120	Ribosomal protein L30/L7 family protein	-0.584963
AT2G47990	Encodes a transducin family nucleolar protein with six WD40 repeats that is most likely involved in 18S rRNA biogenesis. The slow progression of the gametophytic division cycles in swa1 suggested that the SWA1 protein is required for the normal progression of mitotic division cycles through the regulation of cell metabolism. Ubiquitously expressed throughout the plant.	-0.590237
AT3G02560	Ribosomal protein S7e family protein	-0.77259
AT3G07050	Arabidopsis NSN1 encodes a nucleolar GTP- binding protein and is required for maintenance of inflorescence meristem identity and floral organ development.	-0.710493
AT3G13580	Ribosomal protein L30/L7 family protein	-0.716207
AT3G14600	Ribosomal protein L18ae/LX family protein	-1.06413
AT3G47370	Ribosomal protein S10p/S20e family protein	-0.774188
AT3G49910	Translation protein SH3-like family protein	-0.690316
AT3G57490	Ribosomal protein S5 family protein	-0.801565
AT3G58700	Ribosomal L5P family protein	-0.673772
AT3G59540	Ribosomal L38e protein family	-0.82415
AT3G62870	Ribosomal protein L7Ae/L30e/S12e/Gadd45 family protein	-0.596935
AT4G02230	Ribosomal protein L19e family protein	-0.69773
AT4G07410	Encodes a WD-40 protein expressed both during embryo development and postembryonically in the SAM and RAM that functions in the auxin pathway, integrating auxin signaling in the organization and maintenance of the SAM and RAM.	-0.605721
AT4G09800	encodes a ribosomal protein S18C, a constituent of the small subunit of the ribosomal complex	-0.767827
AT4G25740	RNA binding Plectin/S10 domain-containing protein	-0.672425
AT4G25890	60S acidic ribosomal protein family	0.603483
AT4G27090	Ribosomal protein L14	-0.592576
AT4G28200	U3 small nucleolar RNA-associated-like protein	-0.722466
AT4G28450	This gene is predicted to encode a protein with a DWD motif. It can bind to DDB1a in Y2H assays and may be involved in the formation of a CUL4-based E3 ubiquitin ligase	-0.611804
AT4G34555	Ribosomal protein S25 family protein	0.925361
AT4G34670	Ribosomal protein S3Ae	-0.880853
AT4G39200	Ribosomal protein S25 family protein	-0.710493
AT5G02450	Ribosomal protein L36e family protein	-0.685891
AT5G10360	RPS6A and RPS6B are fully redundant and essential during gametogenesis.	-0.701659
AT5G11010	Pre-mRNA cleavage complex II protein family	-1.30023
AT5G14520	Encodes a nucleolar protein that plays an essential role in cell growth and survival through its regulation of ribosome biogenesis and mitotic progression.	-0.623695
AT5G15550	Transducin/WD40 repeat-like superfamily protein	-0.88243
AT5G20290	Ribosomal protein S8e family protein	-0.64689
AT5G22440	Ribosomal protein L1p/L10e family	-0.594008
AT5G23740	Encodes a putative ribosomal protein S11 (RPS11-beta).	-0.672597
AT5G23900	Ribosomal protein L13e family protein	-0.905673
AT5G27770	Ribosomal L22e protein family	-0.76033
AT5G28060	Ribosomal protein S24e family protein	-0.765535
AT5G52650	RNA binding Plectin/S10 domain-containing protein	-0.669176
AT5G67510	Translation protein SH3-like family protein	-0.597241

## Sheet: Mitochondrial RPs
Locus Identifier	Gene Model Description	log2(WT+T2/WT mock) translation efficiency
AT1G15810	S15/NS1, RNA-binding protein	-0.807355
AT1G49400	Nucleic acid-binding, OB-fold-like protein	0.844205
AT2G18400	ribosomal protein L6 family protein	-0.590016
AT2G44065	Ribosomal protein L2 family	-0.630766
AT3G01790	Ribosomal protein L13 family protein	-0.894507
AT3G17465	encodes a putative L3 ribosomal protein targeted to the plastid.	-0.816037
AT3G22300	Nuclear-encoded gene for mitochondrial ribosomal small subunit protein S10	-0.730813
AT4G11630	Ribosomal protein L19 family protein	-0.81516
AT4G30930	Encodes a ribosomal RPL21M protein that is localized to the mitochondrion and is involved in karyogamy during female gametophyte development and fertilization. Mutants display defects in both male and female gametophyte development (i.e.collapsed pollen and female gametophytes with unfused central cells).	-0.85561
AT4G36420	Ribosomal protein L12 family protein	-0.638901
AT5G23535	KOW domain-containing protein	1.47573
AT5G27820	Ribosomal L18p/L5e family protein	-0.759387
AT5G56940	Ribosomal protein S16 family protein	-0.954912
AT5G64650	Ribosomal protein L17 family protein	0.797507

## Sheet: Plastidial RPs
Locus Identifier	Gene Model Description	log2(WT+T2/WT mock) translation efficiency
AT3G27850	50S ribosomal protein L12-C The mRNA is cell-to-cell mobile.	0.72054
ATCG00160	Chloroplast ribosomal protein S2	-1.14439
ATCG00330	30S chloroplast ribosomal protein S14	-1.32193
ATCG00380	Chloroplast encoded ribosomal protein S4	-0.947533
ATCG00640	encodes a chloroplast ribosomal protein L33, a constituent of the large subunit of the ribosomal complex	-0.830075
ATCG00650	chloroplast-encoded ribosomal protein S18	-0.819428
ATCG00660	encodes a chloroplast ribosomal protein L20, a constituent of the large subunit of the ribosomal complex	-1.05889
ATCG00750	30S chloroplast ribosomal protein S11	-1
ATCG00760	encodes a chloroplast ribosomal protein L36, a constituent of the large subunit of the ribosomal complex	-1.40439
ATCG00770	chloroplast 30S ribosomal protein S8	-1.02975
ATCG00780	encodes a chloroplast ribosomal protein L14, a constituent of the large subunit of the ribosomal complex	-1.04182
ATCG00790	chloroplast gene encoding a ribosomal protein L16, which is a constituent of 50S large ribosomal subunit	-1.66297
ATCG00800	encodes a chloroplast ribosomal protein S3, a constituent of the small subunit of the ribosomal complex	-1.24793
ATCG00810	encodes a chloroplast ribosomal protein L22, a constituent of the large subunit of the ribosomal complex	-1.34792
ATCG00820	Encodes a 6.8-kDa protein of the small ribosomal subunit.	-1.10692
ATCG01020	encodes a chloroplast ribosomal protein L32, a constituent of the large subunit of the ribosomal complex	-0.584963
ATCG01120	encodes a chloroplast ribosomal protein S15, a constituent of the small subunit of the ribosomal complex	-0.762501

## Sheet: Protein biosynthesis
Locus Identifier	Gene Model Description	log2(WT+T2/WT mock) translation efficiency
AT1G07770	Encodes cytoplasmic ribosomal protein S15a.	-1.41504
AT1G09640	Translation elongation factor EF1B, gamma chain	-0.595455
AT1G15250	Zinc-binding ribosomal protein family protein	-0.716752
AT1G15440	Encodes a nucleolar protein that is a ribosome biogenesis co-factor. Mutants display aberrant RNA processing and female gametophyte development.	-1.11704
AT1G15810	S15/NS1, RNA-binding protein	-0.807355
AT1G15930	Ribosomal protein L7Ae/L30e/S12e/Gadd45 family protein	-0.874469
AT1G28350	Nucleotidylyl transferase superfamily protein	-0.620882
AT1G30230	Encodes a guanine nucleotide exchange factor that plays an important role in translation elongation. It is localized in the plasma membrane and cytosol. Mutants display ectopic lignin deposition as well as cell expansion defects	-1.01594
AT1G49400	Nucleic acid-binding, OB-fold-like protein	0.844205
AT1G49760	polyadenylate-binding protein, putative / PABP, putative, similar to poly(A)-binding protein GB:AAF66825 GI:7673359 from (Nicotiana tabacum). Highly and ubiquitously expressed. Member of the class II PABP family.	-1.05063
AT1G52980	Encodes a GTPase that belongs to the subfamily of YlqF/YawG GTPases. Functions in Pre-60S ribosomal subunit maturation. The mRNA is cell-to-cell mobile.	-0.655352
AT1G63980	D111/G-patch domain-containing protein	-1.25154
AT1G69620	putative 60S ribosomal protein L34 The mRNA is cell-to-cell mobile.	-0.59561
AT1G70980	Class II aminoacyl-tRNA and biotin synthetases superfamily protein	0.826281
AT1G72340	NagB/RpiA/CoA transferase-like superfamily protein	-0.90357
AT2G15910	CSL zinc finger domain-containing protein	-0.877516
AT2G18110	Translation elongation factor EF1B/ribosomal protein S6 family protein	-0.872888
AT2G18400	ribosomal protein L6 family protein	-0.590016
AT2G19740	Ribosomal protein L31e family protein	-0.597902
AT2G33370	Ribosomal protein L14p/L23e family protein	-0.784732
AT2G36160	Ribosomal protein S11 family protein	-0.777608
AT2G37190	Ribosomal protein L11 family protein	-0.625934
AT2G40360	Encodes BOP1, an ortholog of Block of cell proliferation (BOP) protein. A T-DNA null allele of the BOP1 gene is lethal, and a 50% decrease in transcript accumulation is sufficient to cause severe developmental defects linked to defective cell division.	-0.755763
AT2G41840	Ribosomal protein S5 family protein	-0.863365
AT2G44065	Ribosomal protein L2 family	-0.630766
AT2G44120	Ribosomal protein L30/L7 family protein	-0.584963
AT2G46280	Encodes a homolog of mammalian TGF-beta receptor interacting protein. Co-immunoprecipitates with BRI1 and can be phosphorylated in vitro by BRI1 at specific sites (Thr-14, Thr-89, and either Thr-197 or Ser-198). May therefore be a cytoplasmic BRI1 substrate and involved in brassinosteroid regulated plant growth and development.The encoded protein has two DWD motifs. It can bind to DDB1a in Y2H as…	-0.800391
AT2G46290	Transducin/WD40 repeat-like superfamily protein	-0.6186
AT2G47990	Encodes a transducin family nucleolar protein with six WD40 repeats that is most likely involved in 18S rRNA biogenesis. The slow progression of the gametophytic division cycles in swa1 suggested that the SWA1 protein is required for the normal progression of mitotic division cycles through the regulation of cell metabolism. Ubiquitously expressed throughout the plant.	-0.590237
AT3G01790	Ribosomal protein L13 family protein	-0.894507
AT3G02200	Proteasome component (PCI) domain protein	-0.612977
AT3G02560	Ribosomal protein S7e family protein	-0.77259
AT3G07050	Arabidopsis NSN1 encodes a nucleolar GTP- binding protein and is required for maintenance of inflorescence meristem identity and floral organ development.	-0.710493
AT3G13580	Ribosomal protein L30/L7 family protein	-0.716207
AT3G14600	Ribosomal protein L18ae/LX family protein	-1.06413
AT3G17465	encodes a putative L3 ribosomal protein targeted to the plastid.	-0.816037
AT3G22300	Nuclear-encoded gene for mitochondrial ribosomal small subunit protein S10	-0.730813
AT3G26618	eukaryotic release factor 1-3	-0.8024
AT3G27850	50S ribosomal protein L12-C The mRNA is cell-to-cell mobile.	0.72054
AT3G47370	Ribosomal protein S10p/S20e family protein	-0.774188
AT3G49910	Translation protein SH3-like family protein	-0.690316
AT3G57290	Encodes a protein that is found in not only the eif3 complex but also in association with subunits of the COP9 signalosome. eIF3e appears to be subjected to proteasome-dependent degradation that requires the PCI domain of eIF3e. The level of eIF3e present in cells appears to affect the rate of translation.	-0.589624
AT3G57490	Ribosomal protein S5 family protein	-0.801565
AT3G58700	Ribosomal L5P family protein	-0.673772
AT3G59540	Ribosomal L38e protein family	-0.82415
AT3G62870	Ribosomal protein L7Ae/L30e/S12e/Gadd45 family protein	-0.596935
AT4G02230	Ribosomal protein L19e family protein	-0.69773
AT4G07410	Encodes a WD-40 protein expressed both during embryo development and postembryonically in the SAM and RAM that functions in the auxin pathway, integrating auxin signaling in the organization and maintenance of the SAM and RAM.	-0.605721
AT4G09800	encodes a ribosomal protein S18C, a constituent of the small subunit of the ribosomal complex	-0.767827
AT4G11630	Ribosomal protein L19 family protein	-0.81516
AT4G25740	RNA binding Plectin/S10 domain-containing protein	-0.672425
AT4G25890	60S acidic ribosomal protein family	0.603483
AT4G27090	Ribosomal protein L14	-0.592576
AT4G28200	U3 small nucleolar RNA-associated-like protein	-0.722466
AT4G28450	This gene is predicted to encode a protein with a DWD motif. It can bind to DDB1a in Y2H assays and may be involved in the formation of a CUL4-based E3 ubiquitin ligase	-0.611804
AT4G30930	Encodes a ribosomal RPL21M protein that is localized to the mitochondrion and is involved in karyogamy during female gametophyte development and fertilization. Mutants display defects in both male and female gametophyte development (i.e.collapsed pollen and female gametophytes with unfused central cells).	-0.85561
AT4G32915	glutamyl-tRNA(Gln) amidotransferase subunit C	0.595455
AT4G34110	Putative poly-A binding protein. Member of a gene family .Expressed in stele and root meristem and post-fertilization ovules.Member of the class II family of PABP proteins. The mRNA is cell-to-cell mobile.	-0.604071
AT4G34555	Ribosomal protein S25 family protein	0.925361
AT4G34670	Ribosomal protein S3Ae	-0.880853
AT4G36420	Ribosomal protein L12 family protein	-0.638901
AT4G39200	Ribosomal protein S25 family protein	-0.710493
AT5G02450	Ribosomal protein L36e family protein	-0.685891
AT5G10360	RPS6A and RPS6B are fully redundant and essential during gametogenesis.	-0.701659
AT5G11010	Pre-mRNA cleavage complex II protein family	-1.30023
AT5G14520	Encodes a nucleolar protein that plays an essential role in cell growth and survival through its regulation of ribosome biogenesis and mitotic progression.	-0.623695
AT5G15550	Transducin/WD40 repeat-like superfamily protein	-0.88243
AT5G15610	Proteasome component (PCI) domain protein	-0.671767
AT5G19485	transferases/nucleotidyltransferase	0.952303
AT5G20290	Ribosomal protein S8e family protein	-0.64689
AT5G22440	Ribosomal protein L1p/L10e family	-0.594008
AT5G23535	KOW domain-containing protein	1.47573
AT5G23740	Encodes a putative ribosomal protein S11 (RPS11-beta).	-0.672597
AT5G23900	Ribosomal protein L13e family protein	-0.905673
AT5G27770	Ribosomal L22e protein family	-0.76033
AT5G27820	Ribosomal L18p/L5e family protein	-0.759387
AT5G28060	Ribosomal protein S24e family protein	-0.765535
AT5G38640	NagB/RpiA/CoA transferase-like superfamily protein	-0.849975
AT5G52650	RNA binding Plectin/S10 domain-containing protein	-0.669176
AT5G56940	Ribosomal protein S16 family protein	-0.954912
AT5G64650	Ribosomal protein L17 family protein	0.797507
AT5G67510	Translation protein SH3-like family protein	-0.597241
ATCG00160	Chloroplast ribosomal protein S2	-1.14439
ATCG00330	30S chloroplast ribosomal protein S14	-1.32193
ATCG00380	Chloroplast encoded ribosomal protein S4	-0.947533
ATCG00640	encodes a chloroplast ribosomal protein L33, a constituent of the large subunit of the ribosomal complex	-0.830075
ATCG00650	chloroplast-encoded ribosomal protein S18	-0.819428
ATCG00660	encodes a chloroplast ribosomal protein L20, a constituent of the large subunit of the ribosomal complex	-1.05889
ATCG00750	30S chloroplast ribosomal protein S11	-1
ATCG00760	encodes a chloroplast ribosomal protein L36, a constituent of the large subunit of the ribosomal complex	-1.40439
ATCG00770	chloroplast 30S ribosomal protein S8	-1.02975
ATCG00780	encodes a chloroplast ribosomal protein L14, a constituent of the large subunit of the ribosomal complex	-1.04182
ATCG00790	chloroplast gene encoding a ribosomal protein L16, which is a constituent of 50S large ribosomal subunit	-1.66297
ATCG00800	encodes a chloroplast ribosomal protein S3, a constituent of the small subunit of the ribosomal complex	-1.24793
ATCG00810	encodes a chloroplast ribosomal protein L22, a constituent of the large subunit of the ribosomal complex	-1.34792
ATCG00820	Encodes a 6.8-kDa protein of the small ribosomal subunit.	-1.10692
ATCG01020	encodes a chloroplast ribosomal protein L32, a constituent of the large subunit of the ribosomal complex	-0.584963
ATCG01120	encodes a chloroplast ribosomal protein S15, a constituent of the small subunit of the ribosomal complex	-0.762501

## Sheet: Photosynthesis
Locus Identifier	Gene Model Description	log2(WT+T2/WT mock) translation efficiency
AT2G47910	Encodes a chloroplast thylakoid membrane protein. Required for the assembly/accumulation of the NAD(P)H dehydrogenase complex of the photosynthetic electron transport chain.	0.73954
AT3G16140	Encodes subunit H of photosystem I reaction center subunit VI.	0.587177
AT5G20935	DUF3148 family protein	0.669176
AT5G45040	Encodes a Class I cytochrome c family member possessing a high structural homology with photosynthetic cytochrome c(6) from cyanobacteria, but structurally and functionally distinct through the presence of a disulfide bond.	0.72379
ATCG00020	Encodes chlorophyll binding protein D1, a part of the photosystem II reaction center core	-0.652077
ATCG00080	PSII I protein	-1.03684
ATCG00120	Encodes the ATPase alpha subunit, which is a subunit of ATP synthase and part of the CF1 portion which catalyzes the conversion of ADP to ATP using the proton motive force. This complex is located in the thylakoid membrane of the chloroplast.	-0.917538
ATCG00130	ATPase F subunit.	-1.078
ATCG00140	ATPase III subunit	-1.19265
ATCG00150	Encodes a subunit of ATPase complex CF0, which is a proton channel that supplies the proton motive force to drive ATP synthesis by CF1 portion of the complex.	-0.893085
ATCG00220	PSII low MW protein	-1.1161
ATCG00270	PSII D2 protein	-0.963474
ATCG00280	chloroplast gene encoding a CP43 subunit of the photosystem II reaction center. promoter contains a blue-light responsive element.	-1
ATCG00340	Encodes the D1 subunit of photosystem I reaction center.	-1
ATCG00350	Encodes psaA protein comprising the reaction center for photosystem I along with psaB protein; hydrophobic protein encoded by the chloroplast genome.	-1.10692
ATCG00360	Encodes a protein required for photosystem I assembly and stability. In Chlamydomonas reinhardtii, this protein seems to act as a PSI specific chaperone facilitating the assembly of the complex by interacting with PsaA and PsaD. A loss of function mutation in tobacco leads to a loss of photosystem I.	-0.777608
ATCG00420	Encodes NADH dehydrogenase subunit J. Its transcription is increased upon sulfur depletion.	-1.22239
ATCG00430	Encodes a protein which was originally thought to be part of photosystem II but its wheat homolog was later shown to encode for subunit K of NADH dehydrogenase.	-1.16993
ATCG00440	Encodes NADH dehydrogenase D3 subunit of the chloroplast NAD(P)H dehydrogenase complex	-1.16993
ATCG00470	ATPase epsilon subunit	-0.847997
ATCG00480	chloroplast-encoded gene for beta subunit of ATP synthase	-1.03747
ATCG00490	large subunit of RUBISCO. Protein is tyrosine-phosphorylated and its phosphorylation state is modulated in response to ABA in Arabidopsis thaliana seeds.	-1.08246
ATCG00510	Encodes subunit I of photosystem I.	-1.02509
ATCG00520	Encodes a protein required for photosystem I assembly and stability. In cyanobacteria, loss of function mutation in this gene increases PSII/PSI ratio without any influence on photoautotrophic growth.	-1
ATCG00540	Encodes cytochrome f apoprotein; involved in photosynthetic electron transport chain; encoded by the chloroplast genome and is transcriptionally repressed by a nuclear gene HCF2.	-1.05658
ATCG00560	PSII L protein	-1.09311
ATCG00570	PSII cytochrome b559	-0.947533
ATCG00580	PSII cytochrome b559. There have been many speculations about the function of Cyt b559, but the most favored at present is that it plays a protective role by acting as an electron acceptor or electron donor under conditions when electron flow through PSII is not optimized.	-1.18442
ATCG00600	Cytochrome b6-f complex, subunit V. Disruption of homologous gene in Chlamydomonas results in disruption of cytochrome b6-f complex.	-0.931287
ATCG00630	Encodes subunit J of photosystem I.	-1.05889
ATCG00680	encodes for CP47, subunit of the photosystem II reaction center.	-0.961526
ATCG00710	Encodes a 8 kD phosphoprotein that is a component of the photosystem II oxygen evolving core. Its exact molecular function has not been determined but it may play a role in mediating electron transfer between the secondary quinone acceptors, QA and QB, associated with the acceptor side of PSII.	-1.12029
ATCG00720	Encodes the cytochrome b(6) subunit of the cytochrome b6f complex.	-1
ATCG00730	A chloroplast gene encoding subunit IV of the cytochrome b6/f complex	-1.1375
ATCG01010	Chloroplast encoded NADH dehydrogenase unit.	-0.807355
ATCG01040	Cytochrome C assembly protein	-0.874469
ATCG01050	Represents a plastid-encoded subunit of a NAD(P)H dehydrogenase complex. Its mRNA is edited at four positions. Translation data is not available for this gene.	-0.678072
ATCG01060	Encodes the PsaC subunit of photosystem I.	-0.823122
ATCG01070	NADH dehydrogenase ND4L	-1.58496
ATCG01080	NADH dehydrogenase ND6	-1
ATCG01090	Encodes subunit of the chloroplast NAD(P)H dehydrogenase complex	-1.26303
ATCG01100	NADH dehydrogenase ND1	-0.63743
ATCG01110	Encodes the 49KDa plastid NAD(P)H dehydrogenase subunit H protein. Its transcription is regulated by an ndhF-specific plastid sigma factor, SIG4.	-0.830075
