# Supplementary material for: Parallel global profiling of plant TOR dynamics reveals a conserved role for LARP1 in translation
Source: eLife. 2020 Oct 15;9:e58795. doi: 10.7554/eLife.58795 (PMC7584452; doi:10.7554/eLife.58795)
Supplement: Supplementary file 4. — Table presents the fold-change of cytosolic RP abundance and the fold-change of phosphoprotein abundance of the genes with statistically-significant changes. These data are represented as scatterplots in Figure 1E and Figure 2A. [file elife-58795-supp4.xlsx]

## Sheet: Cytosolic RP abundance
Locus Identifier	Gene Model Description	log2(WT+T2/WT mock) cytosolic RP abundance
AT1G15930	Ribosomal protein L7Ae/L30e/S12e/Gadd45 family protein	-0.34
AT2G27720	60S acidic ribosomal protein family	-0.22
AT3G05560	Ribosomal L22e protein family	-0.13
AT3G53890	Cytosolic ribosomal protein. Mutants enhance the varigation effect of var2 mutations suggesting a link between cytosolic translation and chloroplast development.	-0.29
AT3G02080	Ribosomal protein S19e family protein	-0.27
AT2G27710	60S acidic ribosomal protein family	-0.16
AT4G18100	Ribosomal protein L32e	-0.33
AT1G67430	Ribosomal protein L22p/L17e family protein	-0.23
AT2G44120	Ribosomal protein L30/L7 family protein	-0.26
AT5G23740	Encodes a putative ribosomal protein S11 (RPS11-beta).	-0.29
AT4G27090	Ribosomal protein L14	-0.22
AT3G53020	RPL24B encodes ribosomal protein L24, homolog of cytosolic RPL24, found in archaea and higher eukaryotes. Arabidopsis has two RPL24 homologs, RPL24A (AT2G36620) and RPL24B. Mutants showed defects in apical-basal gynoecium patterning similar to previously described ett and mp mutants. Transformation of stv1-1 mutant with a uORF-eliminated ETT construct partially suppressed the stv1 gynoecium pheno…	-0.28
AT4G34670	Ribosomal protein S3Ae	-0.24
AT1G09590	Translation protein SH3-like family protein	-0.25
AT4G16720	Ribosomal protein L23/L15e family protein	0.17
AT1G72370	acidic protein associated to 40S ribosomal subunit of ribosomes. Involved in polysome formation during active protein synthesis. Expressed in actively growing tissue.	-0.17
AT4G00810	Co-orthologous gene of large ribosomal subunit protein RPP1.	-0.52
AT1G01100	Co-orthologous gene of large ribosomal subunit protein RPP1.	-0.25
AT2G09990	Ribosomal protein S5 domain 2-like superfamily protein	-0.27
AT2G04390	Ribosomal S17 family protein	-0.21

## Sheet: Phosphoprotein abundance
Locus identifier	Gene Model Description	log2(WT+T2/WT) phosphoprotein abundance
AT1G01320	Encodes REDUCED CHLOROPLAST COVERAGE 1 (REC1). Located in the nucleus and cytosol. Contributes to establishing the size of the chloroplast compartment.	-0.67
AT1G05150	Calcium-binding tetratricopeptide family protein	0.91
AT1G06210	ENTH/VHS/GAT family protein	-0.94
AT1G15750	Encodes a protein with several WD40 repeats at the C-terminus and predicted protein-protein interaction domains at the N-terminus. Together with the TOPLESS-RELATED PROTEINS (TPRs), it is thought to be involved in transcriptional repression of root-promoting genes in the top half of the embryo during the transition stage of embryogenesis. It can also interact with IAA12 through the EAR domain of …	-2.32
AT1G18800	Double nrp1-1 nrp2-1 mutants show arrest of cell cycle progression at G2/M and disordered cellular organization occurred in root tips. Localize in the nucleus and can form homomeric and heteromeric protein complexes with NRP1. Bind histones Histone2A and Histone2B and associate with chromatin in vivo. Plant mutated in both NRP1 and NRP2 genes show hypersensitivity to genotoxic stresses including …	-1.77
AT1G19870	Encodes a microtubule-associated protein.	-1.32
AT1G21380	Target of Myb protein 1	-1.12
AT1G21660	Chaperone DnaJ-domain superfamily protein	0.94
AT1G25260	Ribosomal protein L10 family protein	-1.46
AT1G26300	BSD domain-containing protein	0.51
AT1G47970	nucleolin	-0.87
AT1G60200	RMB25 is an alternative splicing factor involved in mediation of abiotic stress response and ABA response. Its expression is modulated by a variety of stressors and it in turn appears to affect the ratio of splice variants of stress responsive genes such as HAB1.2/HAB1.1.	-2.77
AT1G61690	phosphoinositide binding protein	-2.23
AT1G67230	Encodes a nuclear coiled-coil protein related to the carrot peripheral nuclear protein NMCP1 that is involved in the determination of plant nuclear structure. Member of a small gene family in Arabidopsis containing 4 proteins (LNC1-4 or CRWN 1-4) with redundant functions in protection from oxidative damage, control of nuclear morphology and degradation of ABI5.	-1.65
AT1G70320	encodes a ubiquitin-protein ligase-like protein containing a HECT domain. There are six other HECT-domain UPLs in Arabidopsis.	0.73
AT1G70830	MLP-like protein 28	-1.92
AT1G76810	eukaryotic translation initiation factor 2 (eIF-2) family protein	-2
AT1G76880	DF1 is a putative transcription factor required for the synthesis of seed mucilage polysaccharides. The df1 seeds produce almost 50% less mucilage than wild-type, but show less severe defects than the myb5 and ttg2 mutants.	-1.88
AT1G80000	CASC3/Barentsz eIF4AIII binding protein	-0.98
AT1G80750	Cytosolic ribosomal 60S subunit protein.	0.5
AT2G01190	Octicosapeptide/Phox/Bem1p family protein	-3.74
AT2G22080	transmembrane protein	-1.81
AT2G25800	elongation factor Ts (DUF810)	0.58
AT2G27100	Identified as a leaf form mutant by Redei having serrated leaves. Further analysis of the single loss of function allele indicated pleiotropic effects extending to many aspects of shoot development such as taller meristems, alterations in phase transition, phyllotaxy and branching. Encodes a single zinc finger containing protein that is expressed in meristems and organ primordia and forms a compl…	-1.55
AT2G27210	BRI1 suppressor 1 (BSU1)-like 3	-1.22
AT2G27710	60S acidic ribosomal protein family	-1.23
AT2G29210	splicing factor PWI domain-containing protein	-1.24
AT2G30710	Ypt/Rab-GAP domain of gyp1p superfamily protein	-2.19
AT2G37050	Leucine-rich repeat protein kinase family protein	3.08
AT2G41740	Encodes a protein with high homology to animal villin.	-1.67
AT2G42320	nucleolar protein gar2-like protein	-2.45
AT2G42600	Encodes one of four Arabidopsis phosphoenolpyruvate carboxylase proteins.PPC1 and PPC2 are crucial for balancing carbon and nitrogen metabolism.	-3.32
AT3G06010	Encodes AtCHR12, a SNF2/Brahma-type chromatin-remodeling protein. AtCHR12 mediates temporary growth arrest in Arabidopsis upon perceiving environmental stress.	0.95
AT3G08850	Encodes one of two Arabidopsis RAPTOR/KOG1 homologs. RAPTOR proteins are binding partners of the target of rapamycin kinase that is present in all eukaryotes and play a central role in the stimulation of cell growth and metabolism in response to nutrients. Mutants show embryo lethal phenotype which occurs at pre-globular stage. May interact with TOR kinase in a rapamycin like signaling pathway. I…	-3.48
AT3G09200	Ribosomal protein L10 family protein	-1.1
AT3G14100	RNA-binding (RRM/RBD/RNP motifs) family protein	-1.81
AT3G25070	Encodes a member of the R protein complex and may represent a virulence target of type III pili effector proteins (virulence factors) from bacterial pathogens, which is 'guarded' by R protein complex (RPM1 and RPS2 proteins). RIN4 physically interacts with RPS2 and RPM1 in vivo. Bacterial avirulence (Avr) effectors AvrB, AvrRpm1, and AvrRpt2 induce a mobility shift in RIN4 and expression of AvrRp…	-0.08
AT3G25520	Encodes ribosomal protein L5 that binds to 5S ribosomal RNA and in involved in its export from the nucleus to the cytoplasm. Identified in a screen for enhancers of as1. as1/pgy double mutants show defects in leaf vascular patterning and adaxial cell fate. Double mutant analysis indicates pgy genes function in the same pathway as REV, KAN1 and KAN2.	-5.32
AT3G26400	member of eIF4B - eukaryotic initiation factor 4B The mRNA is cell-to-cell mobile.	-2.13
AT3G51160	Catalyzes the first step in the de novo synthesis of GDP-L-fucose.	-0.59
AT3G56990	embryo sac development arrest 7	0.46
AT3G57410	Encodes a protein with high homology to animal villin. VLN3 is a Ca2+-regulated villin involved in actin filament bundling.	-1.74
AT3G60240	protein synthesis initiation factor 4G (EIF4G). A mutation in this gene (cum2-1) results in decreased accumulation of CMV coat protein in upper, uninoculated leaves. Likely affects cell-to-cell movement of the virus, also affects TCV multiplication.	1.44
AT4G01150	CURVATURE THYLAKOID 1A-like protein	3.17
AT4G01290	Protein with evolutionarily conserved eIF4E-binding motif in its N-terminal domain that can form mRNA cap?binding complexes and has the potential for regulating gene expression as a translation factor associated plant-specific cell cycle regulator.	-2.94
AT4G03080	BRI1 suppressor 1 (BSU1)-like 1	-2.34
AT4G11740	Isolated as a suppressor of a dominant mutant in the Ara4 gene that was expressed in yeast ypt1 mutant strains. A novel protein with a small region of similarity to coil-coiled domain of yeast VSP27 protein.	-1.68
AT4G11860	FAM63A-like protein (DUF544)	-1.52
AT4G13350	Encodes a GTPase that interacts with nuclear shuttle proteins (NSPs) from a number of different plant viruses. The gene is widely expressed and NIG transcript levels do not rise in response to viral infection. This cytoplasmic protein does not directly interact with a viral movement protein (MP), but, it does promote the movement of NSP from the nucleus to the cytoplasm. Overexpression of NIG in …	-1.31
AT4G15410	serine/threonine protein phosphatase 2A 55 kDa regulatory subunit B prime gamma	-1.95
AT4G15802	Encodes a protein with similarity to heat shock factor binding proteins. Involved in negative regulation of heat shock response. Becomes nuclear localized upon heat treatment.	-1.34
AT4G24280	Involved in protein import into chloroplasts during early developmental stages. The mRNA is cell-to-cell mobile.	-1
AT4G25500	Encodes an arginine/serine-rich splicing factor. The transcript is alternatively spliced and is differentially expressed in different tissues (flowers, roots, stems, and leaves) examined. Barta et al (2010) have proposed a nomenclature for Serine/Arginine-Rich Protein Splicing Factors (SR proteins): Plant Cell. 2010, 22:2926. RS40 binds to HYL1 and co-localizes to the nuclear dicing body. Along w…	-1.75
AT4G25890	60S acidic ribosomal protein family	-2
AT4G28080	Encodes REDUCED CHLOROPLAST COVERAGE 2 (REC2). Along with REC1 and REC3 it contributes to establishing the size of the chloroplast compartment.	-0.75
AT4G28300	Encodes a protein with 13.6% proline amino acids that is predicted to localize to the cell wall. The mRNA is cell-to-cell mobile.	1.81
AT4G32350	Regulator of Vps4 activity in the MVB pathway protein	-1.79
AT4G32610	copper ion binding protein	-2.32
AT4G35890	Encodes a cytoplasmic LAM domain containing protein that is involved in leaf senescence. The mRNA is cell-to-cell mobile.	-2.35
AT4G37870	Encodes a phosphoenolpyruvate carboxykinase that localizes to the cytosol.	-0.77
AT4G37930	Encodes a protein with mitochondrial serine hydroxymethyltransferase activity, which functions in the photorespiratory pathway, catalyzes the conversion of serine and tetrahydrofolate to glycine and 5,10-methylene tetrahydrofolate. Involved in controlling cell damage caused by abiotic stress, such as high light and salt and the hypersensitive defense response of plants.	-1.37
AT4G38710	glycine-rich protein	-0.9
AT5G04430	Gene model AT5G04430.1 produces active protein. (BTS1S). Binds to ToMV genomic RNA and prevents viral multiplication.	-1.78
AT5G06970	PATROL1 is a Munc13-like protein involved in mediating H[+]-ATPase translocation. It interacts with AHA1and is responsible for its translocation during stomatal movement.	0.72
AT5G10360	RPS6A and RPS6B are fully redundant and essential during gametogenesis.	-25.44
AT5G14050	Transducin/WD40 repeat-like superfamily protein	-2.92
AT5G15270	RNA-binding KH domain-containing protein	2.25
AT5G16590	Leucine-rich repeat protein kinase family protein	-2.43
AT5G16780	Encodes a protein belonging to SART-1 family. The gene is expressed in the basal region of the developing embryo during heart stage. Phenotypic analyses of dot2 mutants suggest that this protein plays a role in root, shoot, and flower development. dot2 mutants are dwarved plants that display an aberrant spurred leaf venation pattern and fail to flower. In the roots DOT2 appears to be require for …	-1.75
AT5G17910	cardiomyopathy-associated protein	-22.33
AT5G18760	RING/U-box superfamily protein	0.49
AT5G21160	Encodes a protein with sequence similarity to mRNA binding proteins from humans. LARP1a is involved in mRNA degradation in response to heat stress. Upon heat stress LARP1a interacts with XRN4 and appears to be responsible for addressing XRN4 to the polysome. LARP1/XRN4 double mutants are impaired in thermotolerance and lower levels of heat induced RNA turnover.	-4.26
AT5G24460	RING-H2 zinc finger protein	-2.4
AT5G43830	aluminum induced protein with YGL and LRDR motifs	-1.58
AT5G49760	Leucine rich receptor kinase.	1.2
AT5G52040	Encodes an arginine/serine-rich splicing factor. Transcript is alternatively spliced and is differentially expressed in different tissues (flowers, roots, stems, and leaves) examined. Barta et al (2010) have proposed a nomenclature for Serine/Arginine-Rich Protein Splicing Factors (SR proteins): Plant Cell. 2010, 22:2926. RS41 binds to HYL1 and co-localizes to the nuclear dicing body. Along with …	-1
AT5G52530	dentin sialophosphoprotein-like protein	-10.24
AT5G53470	Encodes an acyl-CoA binding protein that is localized to vesicles,and plasma membrane especially in epidermal cells of heart, torpedo and cotyledon stage embryos, cell wall of the seed coat. Northern blot analysis showed that the 1.4 kb ACBP1 mRNA was expressed in silique, root, stem, leaf and flower.	1.02
AT5G54430	Contains a universal stress protein domain. Protein is phosphorylated in response to Phytophthora infestans zoospores and xylanase.	1.01
AT5G54910	DEA(D/H)-box RNA helicase family protein	-1.62
AT5G55230	Binds and bundles microtubules. Plays a role in stabilizing anti-parallel microtubules in the central spindle at anaphase to early cytokinesis but is not essential at the midline of the phragmoplast at later stages. The timing with which the MAP65-1 was targeted to the spindle appears to be regulated by a phosphorylation sensitive switch. Enhances microtubule polymerization, promotes nucleation a…	-3.22
AT5G55660	DEK domain-containing chromatin associated protein	1.15
AT5G56980	cotton fiber protein	-1.15
AT5G58040	Encodes a subunit of the polyadenylation apparatus that interacts with and stimulates the activity of poly(A) polymerase. Additionally , it interacts with several polyadenylation factor subunits and is an RNA-binding protein. It is suggested that this protein coordinates a number of polyadenylation factor subunits with PAP and with RNA. The mRNA is cell-to-cell mobile.	-0.84
AT5G64200	encodes an SC35-like splicing factor of 35 kD localized to the nuclear specks.	0.77
