# Supplementary material for: Parallel global profiling of plant TOR dynamics reveals a conserved role for LARP1 in translation
Source: eLife. 2020 Oct 15;9:e58795. doi: 10.7554/eLife.58795 (PMC7584452; doi:10.7554/eLife.58795)
Supplement: Supplementary file 7. — Table presents the fold-change in translation efficiency levels of the genes from the different categories, as determined by Mapman analysis. These data are represented as a box-whisker plot in Figure 4C. [file elife-58795-supp7.xlsx]

## Sheet: Cell wall
Locus identifier	Gene Model Description	log2(larp1/WT) translation efficiency
AT1G12560	Member of Alpha-Expansin Gene Family. Naming convention from the Expansin Working Group (Kende et al, 2004. Plant Mol Bio). Containing a conserved root hair-specific cis-element RHE. Expressed specifically in root hair cell and involved in root hair elongation.	0.788496
AT1G23720	Proline-rich extensin-like family protein	0.704418
AT1G27120	Encodes a Golgi-localized hydroxyproline-O-galactosyltransferase.	-0.874469
AT1G74800	Encodes a Golgi-localized hydroxyproline galactosyltransferase GALT5. Functions together with GALT2 as redundant GALTs that control AGP (arabinogalactan-proteins) O-glycosylation, which is essential for normal growth and development. Mutants display multiple phenotypes including reduced root hair growth.	-0.932886
AT2G03220	member of Glycosyltransferase Family- 37	-0.620586
AT2G04780	fasciclin-like arabinogalactan-protein 7 (Fla7)	0.706034
AT2G23130	AGP17 is a lysine-rich arabinogalactan-protein (AGP) and part of a multi-gene family of glycoproteins with approx. 50 members. It falls into one subclass with AGP18 and AGP19, other lysine-rich AGPs. 84% of its proline residues are hydroxylated to hydroproline and its heavy glycosylation accounts for appr. 69% of the molecular weight. The main glycosyl residues are arabinose (30.1%) and galactose…	1.21501
AT2G44300	Bifunctional inhibitor/lipid-transfer protein/seed storage 2S albumin superfamily protein	0.678072
AT2G45470	FASCICLIN-like arabinogalactan protein 8	0.72837
AT2G47930	arabinogalactan protein 26	1.549
AT3G28550	Proline-rich extensin-like family protein	1.44843
AT3G45230	Encodes the arabinogalactan protein core of plant cell wall proteoglycan that contains arabinogalactan and cell wall matrix glycan pectin and/or xylan domains.	0.808737
AT3G45970	member of EXPANSIN-LIKE. Naming convention from the Expansin Working Group (Kende et al, 2004. Plant Mol Bio) The mRNA is cell-to-cell mobile.	-0.674809
AT3G52370	FASCICLIN-like arabinogalactan protein 15 precursor	0.699457
AT3G54590	Encodes a hydroxyproline-rich glycoprotein. The mRNA is cell-to-cell mobile.	1.39418
AT3G62680	Proline-rich protein The mRNA is cell-to-cell mobile.	1.40259
AT4G02270	root hair specific 13	0.919
AT4G09030	Encodes arabinogalactan protein (AGP10). The mRNA is cell-to-cell mobile.	0.640178
AT4G13390	Proline-rich extensin-like family protein	1.42701
AT4G37450	AGP18 is a lysine-rich arabinogalactan-protein (AGP) and part of a multi-gene family of glycoproteins with approx. 50 members. It falls into one subclass with AGP17 and AGP19, other lysine-rich AGPs. It is expressed in young leaves, shoots, roots and flowers and is active in the regulation of the selection and survival of megaspores.	1.35915
AT5G03170	Encodes FLA11, a member of fasciclin-like arabinogalactan proteins (FLAs) containing a cell adhesion fasciclin (FAS) domain. Mutations result in altered stem biomechanics with reduced tensile strength and reduced tensile modulus of elasticity, as well as altered cell wall architecture and composition, with increased cellulose microfibril angle, reduced arabinose, galactose and cellulose content.	0.651196
AT5G10430	Encodes arabinogalactan-protein (AGP4) that is expressed in female reproductive tissues. It is involved in promoting degeneration of the persistent synergid after fertilization. In mutant ovules, the persistent synergid does not degrade resulting in polytuby.	1.1836
AT5G64310	Encodes arabinogalactan-protein (AGP1). The mRNA is cell-to-cell mobile.	1.21807
AT5G65390	arabinogalactan protein 7	0.632471

## Sheet: Chromatin
Locus identifier	Gene Model Description	log2(larp1/WT) translation efficiency
AT1G08600	The Arabidopsis ATRX harbours a N-terminal ADD domain and a C-terminal helicase domain and is devoid of the large central region involved in DAXX interaction in mammals. Arabidopsis ATRX mutant alleles are viable, but with reduced fertility. Their combination with mutants for the H3.3 chaperone HIRA impairs plant survival. ATRX loss affects cellular histone H3.3 pools and modulates the H3.1/H3.3 …	-0.812373
AT1G10450	Encodes SIN3-like 6, a homolog of the transcriptional repressor SIN3 (AT1G24190).	-0.723482
AT1G15910	Belongs to a subgroup of SGS3-like proteins that act redundantly in RNA-directed DNA methylation: AT1G15910 (FDM1), AT4G00380 (FDM2), AT3G12550 (FDM3), AT1G13790 (FDM4), AT1G80790 (FDM5).	-0.767339
AT1G24190	Enhances AtERF7-mediated transcriptional repression. RNAi lines show ABA hypersensitivity. Interacts with ERF7 and HDA19.	-1.07325
AT1G48410	Encodes an RNA Slicer that selectively recruits microRNAs and siRNAs. There is currently no evidence that AGO1 Slicer is in a high molecular weight RNA-induced silencing complex (RISC). Mutants are defective in post-transcriptional gene silencing and have pleiotropic developmental and morphological defects. Through its action on the regulation of ARF17 expression, the protein regulates genes invo…	-1.03242
AT1G51745	Tudor/PWWP/MBT superfamily protein	-0.767827
AT1G59890	SIN3-like 5	-0.691878
AT1G62830	Encodes a homolog of human Lysine-Specific Demethylase1. Involved in H3K4 methylation of target genes including the flowering time loci FLC and FWA. Located in nucleus. Negatively regulates root elongation. Involved in repression of LRP1 via histone deacetylation.	-0.60514
AT1G65440	Related to yeast Spt6 protein, which functions as part of a protein complex in transcription initiation and also plays a role in chromatin structure / assembly. It encodes a putative WG/GW-repeat protein involved in the regulation of apical-basal polarity of embryo	-1.05445
AT1G65470	Chromatin Assembly Factor-1 (CAF-1) p150 subunit. Mutants have reduced heterochromatin content. In Arabidopsis, the three CAF-1 subunits are encoded by FAS1, FAS2 and, most likely, MSI1, respectively. Mutations in FAS1 or FAS2 lead to increased frequency of homologous recombination and T-DNA integration in Arabidopsis.	-0.714246
AT1G69770	Encodes a chromomethylase involved in methylating cytosine residues at non-CG sites. Involved in preferentially methylating transposon-related sequences, reducing their mobility. CMT3 interacts with an Arabidopsis homologue of HP1 (heterochromatin protein 1), which in turn interacts with methylated histones. Involved in gene silencing.	-0.906891
AT1G70060	Encodes a homolog of the transcriptional repressor SIN3 (AT1G24190). The mRNA is cell-to-cell mobile.	-0.984893
AT1G73100	Encodes a SU(VAR)3-9 homolog, a SET domain protein. Known SET domain proteins are involved in epigenetic control of gene expression and act as histone methyltransferases. There are 10 SUVH genes in Arabidopsis and members of this subfamily of the SET proteins have an additional conserved SRA domain.	-0.900464
AT1G77300	Encodes a protein with histone lysine N-methyltransferase activity required specifically for the trimethylation of H3-K4 in FLC chromatin (and not in H3-K36 dimethylation). Acts as an inhibitor of flowering specifically involved in the autonomous promotion pathway. EFS also regulates the expression of genes involved in carotenoid biosynthesis.Modification of histone methylation at the CRTISO locu…	-1.20163
AT2G16780	Encodes a WD-40 repeat protein similar to yeast MSI1.	-0.706953
AT2G19480	This gene is predicted to encode a nucleosome assembly protein. Plant lines expressing an RNAi construct directed against this gene show a reduction in agrobacterium-mediated root transformation. The mRNA is cell-to-cell mobile. Plants mutated in three ubiquitously expressed NAP1 genes (NAP1;1~NAP1;3) and organ-specifically expressed NAP1;4 gene show hypersensitivity to genotoxic stresses includi…	-0.894507
AT2G19520	Controls flowering.	-0.684798
AT2G22740	Encodes a SU(VAR)3-9 homolog, a methyltransferase involved in histone methylation. The protein was shown to bind to methylated cytosines of CG, CNG and CNN motifs but has a preference for the latter two. This is a member of a subfamily of SET proteins that shares a conserved SRA domain.	-1.26053
AT2G23740	Encodes a SET-domain protein SUVR5 that mediates H3K9me2 deposition and silencing at stimulus response genes in a DNA methylation-independent manner.	-1.32862
AT2G25170	Encodes a SWI/SWF nuclear-localized chromatin remodeling factor of the CHD3 group. Involved in post-germination repression of embryonic development. Acts with GA to establish repression of embryonic genes upon germination. Protein preferentially accumulates in differentiating tissues. Loss of function alleles are associated with expression of embryonic traits in adult plants and derepression of e…	-1.11757
AT2G27040	AGO4 is a member of a class of PAZ/PIWI domain containing proteins involved in siRNA mediated gene silencing.Loss of function mutations have reduced site specific CpNpG and CpHpH methylation and increased susceptibility to bacterial pathogens including Tobacco rattle virus.	-0.971618
AT2G27840	Belongs to the plant specific HD2 type proteins; similar to nucleolar Zea mays histone deacetylase; HD2-p39	-0.735103
AT2G28290	Encodes a SWI2/SNF2-like protein in the SNF2 subclass. Homozygous plants with null mutations exhibit premature termination of the meristem and carpelloid structures from the inflorescence meristem. Co-activator of floral homeotic gene expression. Acts with LFY to regulate shoot apical meristem identity. Required for meristem maintenance. Regulates flowering under a non-inductive photoperiod. It p…	-1.05658
AT2G28720	Histone superfamily protein	-1.09954
AT2G36740	DNA binding protein SWC2	-0.591535
AT2G38810	Encodes HTA8, a histone H2A protein. Loss of all H2A.Z (triple mutant with HTA9 and HTA11) results in a reduction in DNA methylation of transposons but not that of genes. Loss of H2A.Z causes misregulation of many genes involved in the response to developmental and environmental cues, and that these genes tend to have high levels of gene-body H2A.Z.	0.636493
AT2G44150	Encodes a protein-lysine N-methyltransferase. Located in ER.	-0.649503
AT2G46020	Encodes a SWI/SNF chromatin remodeling ATPase that upregulates transcription of all three CUC genes and is involved in the formation and/or maintenance of boundary cells during embryogenesis. Also mediates repression of expression of seed storage proteins in vegetative tissues. Interacts strongly with AtSWI3C, also with AtSWI3B, but not with AtSWI3A or AtSWI3D.	-0.68966
AT2G47210	myb-like transcription factor family protein	-0.64689
AT2G47620	Homologous to yeast SWI3 and a member of the Arabidopsis SWI3 gene family. Protein physically interacts with ATSWI3B and ATSWI3C, the other two members of the SWI3 family.	-0.784271
AT3G01320	Encodes SIN3-like 1, a homolog of the transcriptional repressor SIN3 (AT1G24190).	-1.09954
AT3G06010	Encodes AtCHR12, a SNF2/Brahma-type chromatin-remodeling protein. AtCHR12 mediates temporary growth arrest in Arabidopsis upon perceiving environmental stress.	-0.612184
AT3G06400	Encodes a SWI2/SNF2 chromatin remodeling protein belonging to the ISWI family. Involved in nuclear proliferation during megagametogenesis and cell expansion in the sporophyte. Constitutively expressed. RNAi induced loss of function in megagametogenesis results in female sterility.35S:RNAi plants have reduced stature. Double mutation in CHR17 and CHR11 results in the loss of the evenly spaced nucl…	-1
AT3G06930	Encodes an type I protein arginine methyltransferase. PRMT4b can catalyze the asymmetric dimethylation of arginines 2,17, and 26 on histone 3 and can also methylate myelin basic protein in vitro. Double mutants lacking PRMT4a and 4b have reduced levels of histone 3 methylated at R17. These double mutants flower late due to defects in the autonomous pathway and they have elevated levels of FLC tra…	-0.60921
AT3G12810	Encodes a protein similar to ATP-dependent, chromatin-remodeling proteins of the ISWI and SWI2/SNF2 family. Genetic analyses suggest that this gene is involved in multiple flowering pathways. Mutations in PIE1 results in suppression of FLC-mediated delay of flowering and causes early flowering in noninductive photoperiods independently of FLC. PIE1 is required for expression of FLC in the shoot a…	-1.08746
AT3G18520	Encodes a protein with similarity to histone deacetylases. Plants expressing RNAi directed against this gene show a moderate resistance to agrobacterium-mediated root transformation.	-1.01123
AT3G23980	Encodes a protein that interacts with the Polycomb-group (Pc-G) histone methyltransferase CLF (CURLY LEAF). It colocalizes with CLF to the nucleus and represses a subset of Pc-G target genes. The pleiotropic developmental mutant phenotype suggests that BLI prevents premature differentiation.	-0.777608
AT3G24440	Encodes Vernalization Insensitive 3-like 1 (VIL1). VIL1 is involved in the photoperiod and vernalization of Arabidopsis by regulating expression of the related floral repressors Flowering Locus C (FLC) and Flowering Locus M (FLM). VIL1, along with VIN3 (Vernalization Insensitive 3) is necessary for the chromatin modification to FLC and FLM.	-0.807355
AT3G28730	encodes a component of the FAcilitates Chromatin Transcription (FACT) complex, SSRP1. Along with STP16 binds to the promoter of FLC.	-1.078
AT3G44750	Encodes a histone deacetylase. Controls the development of adaxial/abaxial leaf polarity. Two lines with RNAi-directed against this gene show reduced Agrobacterium-mediated DNA transformation of the roots.	-0.923649
AT3G48670	Encodes IDN2 (INVOLVED IN DE NOVO 2), a double-stranded RNA-binding protein involved in de novo methylation and small interfering RNA (siRNA)-mediated maintenance methylation. IND2 is a component of the RNA-directed DNA methylation pathway.	-0.911463
AT3G49250	Similar to hinge-domain region of structural maintenance of chromosomes (SMC)proteins.Putative chromosome architecture protein that can potentialy link nucleic acids in facilitating an RNA1-mediated epigenetic modification involving secondary siRNA and spreading of DNA methylation.	-0.902703
AT3G52250	Encodes a protein with a putative role in mRNA splicing. The mRNA is cell-to-cell mobile.	-0.932886
AT3G57300	Encodes the Arabidopsis INO80 ortholog of the SWI/SNF ATPase family that has been shown to interact with H2A.Z and facilitates the enrichment of H2A.Z at the ends of the flowering repressor genes FLC and MAF4/5. Functions as a positive regulator of DNA homologous recombination (HR) and plays a crucial role in genome stability maintenance. In INO80 mutants, the HR frequency is reduced to 15% of th…	-1.07276
AT4G10710	encodes a component of the FAcilitates Chromatin Transcription (FACT) complex, SPT16.Along with SSRP1 binds to the promoter of FLC.	-1.13551
AT4G13460	Encodes a SU(VAR)3-9 homolog, a SET domain protein. Known SET domain proteins are involved in epigenetic control of gene expression and act as histone methyltransferases. There are 10 SUVH genes in Arabidopsis and members of this subfamily of the SET proteins have an additional conserved SRA domain. A plant line expressing an RNAi construct directed against this gene has reduced agrobacterium-med…	-0.862496
AT4G15180	Encodes SET domain containing protein that acts redundantly with ATX4/5 to regulate histone H3-K4 methylation.	-1.05063
AT4G16310	FAD-dependent lysine-specific histone demethylase involved in the control of flowering time.	-1.3112
AT4G19020	Encodes a plant DNA methyltransferase that methylates mainly cytosines in CHH (H = any base but G) contexts. It is involved in heat tolerance.	-0.672425
AT4G26110	Encodes a member of a small gene family of proteins with similarity to nucleosome assembly proteins.May function in nucleotide excision repair. Loss of function mutations have no obvious visible phenotypes but do seem to affect transcription of NER related genes. The mRNA is cell-to-cell mobile. Plants mutated in three ubiquitously expressed NAP1 genes (NAP1;1~NAP1;3) and organ-specifically expre…	-0.903138
AT4G33470	Encodes HDA14, a member of the histone deacetylase family proteins that can deacetylate a-tubulin, associates with a/b-tubulin and is retained on GTP/taxol-stabilized microtubules, at least in part, by direct association with the PP2A-A2 subunit. The association of a histone deacetylase with PP2A suggests a direct link between protein phosphorylation and acetylation.	0.707218
AT4G37210	Tetratricopeptide repeat (TPR)-like superfamily protein	-0.816693
AT4G37280	MRG family protein	-0.653824
AT5G02560	Encodes HTA12, a histone H2A protein.	1.3995
AT5G08450	Component of histone-deacetylase complexes. Interacts with HDA6 and HDA19 and facilitates histone deacetylation. Several salt-inducible genes are de-repressed in hdc1 mutants. Mutants are hypersensitive to ABA during germination, grow less and flower later than wildtype. HDC1-overexpressing plants display opposite phenotypes.	-0.751321
AT5G09740	Encodes an enzyme with histone acetyltransferase activity. HAM2 primarily acetylate histone H4, but also display some ability to acetylate H3. Prior acetylation of lysine 5 on histone H4 reduces radioactive acetylation by either HAM2.	-0.701776
AT5G15020	Encodes a homolog of the transcriptional repressor SIN3 (AT1G24190).	-1.11042
AT5G17690	Regulates the meristem response to light signals and the maintenance of inflorescence meristem identity. Influences developmental processes controlled by APETALA1. TFL2 silences specific genes within euchromatin but not genes positioned in heterochromatin. TFL2 protein localized preferentially to euchromatic regions and not to heterochromatic chromocenters. Involved in euchromatin organization. R…	-0.736966
AT5G18620	Encodes a member of the A. thaliana imitation switch (AtISWI) subfamily of chromatin remodeling factors. Double mutation in CHR17 and CHR11 results in the loss of the evenly spaced nucleosome pattern in gene bodies, but does not affect nucleosome density.	-1.29336
AT5G19950	tudor domain protein (DUF1767)	0.747234
AT5G22650	Encodes a member of a plant-specific class of histone deacetylases. Controls the development of adaxial/abaxial leaf polarity. Its mRNA is widely expressed in stems, leaves, flowers and young siliques. Plant lines expressing RNAi constructs directed against this gene showed a marked reduction in agrobacterium-mediated root transformation.	-0.801774
AT5G38110	This gene is predicted to encode a silencing group A protein. Plant lines expressing RNAi constructs directed against SGA1 have reduced levels of agrobacterium-mediated root transformation. Its expression is regulated during cell cycle progression through E2F transcription factors.	0.910733
AT5G43810	Encodes Argonaute10, a member of the EIF2C (elongation initiation factor 2c)/ Argonaute class of proteins. Required to establish the central-peripheral organization of the embryo apex. Along with WUS and CLV genes, controls the relative organization of central zone and peripheral zone cells in meristems. Acts in embryonic provascular tissue potentiating WUSCHEL function during meristem developmen…	-0.94596
AT5G44800	chromatin remodeling 4	-0.665581
AT5G49160	Encodes a cytosine methyltransferase MET1. Required for silencing of FWA paternal allele in endosperm. Two lines with RNAi constructs directed against DMT1 have reduced agrobacterium-mediated tumor formation. The mRNA is cell-to-cell mobile.	-1.01436
AT5G53430	Homology Subgroup III; Orthology Group 2 - A putative histone methyltransferase (predicted to methylate H3K4) related to the Drosophila trithorax group proteins TRX and TRR and the yeast gene SET1. A plant line expressing an RNAi construct directed against this gene has reduced agrobacterium-mediated tumor formation.	-0.736966
AT5G56950	Encodes a member of a small gene family of proteins with similarity to nucleosome assembly proteins.May function in nucleotide excision repair. Loss of function mutations have no obvious visible phenotypes but do seem to affect transcription of NER related genes. Plants mutated in three ubiquitously expressed NAP1 genes (NAP1;1~NAP1;3) and organ-specifically expressed NAP1;4 gene show hypersensit…	-0.734018
AT5G58230	Encodes a WD-40 repeat containing protein that functions in chromatin assembly as part of the CAF1 and FIE complex. Mutants exhibit parthenogenetic development that includes proliferation of unfertilized endosperm and embryos. In heterozygous plants 50% of embryos abort. Of the aborted embryos the early aborted class are homozygous and the later aborting lass are heterozygotes in which the defect…	-0.970854
AT5G63110	RPD3-like histone deacetylase. HDA6 mutations specifically increase the expression of auxin-responsive transgenes, suggesting a role in transgene silencing.	-0.991489
AT5G63950	chromatin remodeling 24	-1.43296
AT5G64610	Encodes an enzyme with histone acetyltransferase activity. HAM1 primarily acetylate histone H4, but also display some ability to acetylate H3. Prior acetylation of lysine 5 on histone H4 reduces radioactive acetylation by either HAM1. HAM1 acetylates histone H4 lysine 5.	-0.621488
AT5G66750	Protein is similar to SWI2/SNF2 chromatin remodeling proteins. DDM1 is appears to act as a chromatin-remodeling ATPase involved in cytosine methylation in CG and non-CG contexts. Involved in gene silencing and maintenance of DNA methylation and histone methylation. Hypomethylation of many genomic regions occurs in ddm1 mutants, and can cause several phenotypic abnormalities, but some loci, such a…	-0.884523
AT5G67630	P-loop containing nucleoside triphosphate hydrolases superfamily protein	-1.1635

## Sheet: Protein biosynthesis
Locus identifier	Gene Model Description	log2(larp1/WT) translation efficiency
AT1G04170	protein synthesis initiation factor eIF2 gamma The mRNA is cell-to-cell mobile.	-0.581774
AT1G07830	ribosomal protein L29 family protein	0.673772
AT1G07940	GTP binding Elongation factor Tu family protein	-0.736966
AT1G08410	Encodes a large 60S subunit nuclear export GTPase 1 that is required for 40S maturation and is involved in ribosome biogenesis and affects multiple auxin-regulated development processes.	-0.60224
AT1G09620	ATP binding/leucine-tRNA ligases/aminoacyl-tRNA ligase	-1.07907
AT1G12920	Encodes a eukaryotic release factor one homolog.	-0.601082
AT1G13950	Encodes eukaryotic translation initiation factor 5A (EIF-5A).In mammalian cells it functions as a shuttle protein that translocates mRNA from the nucleus to cytoplasmic ribosomes. Overexpression results in an increase in both primary and secondary xylem formation. In RNAi suppressed lines, xylem formation is reduced.	0.945365
AT1G14610	Required for proper proliferation of basal cells.	-1.03291
AT1G15440	Encodes a nucleolar protein that is a ribosome biogenesis co-factor. Mutants display aberrant RNA processing and female gametophyte development.	-1.07696
AT1G16740	Ribosomal protein L20	-0.728698
AT1G17220	Encodes a chloroplast localized protein with similarity to translation initiation factor 2. Can complement loss of INFB in E.coli suggesting FUG1 does function as a translation initiation factor in vivo. Identified as a suppressor of the leaf variegation mutant var2-6. Suppression is only seen in hypomorphs as complete loss of function alleles are embryo lethal. The mRNA is cell-to-cell mobile.	-1.07635
AT1G17960	Threonyl-tRNA synthetase	-0.843496
AT1G18070	Translation elongation factor EF1A/initiation factor IF2gamma family protein	-0.714091
AT1G25350	glutamine-tRNA ligase, putative / glutaminyl-tRNA synthetase, putative / GlnRS	-0.867245
AT1G27470	transducin family protein / WD-40 repeat family protein	-0.678072
AT1G28350	Nucleotidylyl transferase superfamily protein	-1.07276
AT1G29880	glycyl-tRNA synthetase / glycine-tRNA ligase	-0.809178
AT1G31660	Encodes a protein that is a ribosome biogenesis co-factor. Mutants display aberrant RNA processing and male and female gametophyte development.	-0.778873
AT1G31817	Ribosomal L18p/L5e family protein	-0.626382
AT1G36730	Translation initiation factor IF2/IF5	-0.693339
AT1G43170	Encodes a cytoplasmic ribosomal protein. The mRNA is cell-to-cell mobile.	-0.979536
AT1G43860	sequence-specific DNA binding transcription factor	-0.781576
AT1G45332	Translation elongation factor EFG/EF2 protein	-1.02934
AT1G48520	Encodes Glu-tRNA(Gln) amidotransferase subunit B (from Genbank record AF239836).	-0.608809
AT1G50200	Alanyl-tRNA synthetase	-0.779091
AT1G50920	Putative GTPase involved in HA - and ABA-mediated signaling pathways, particularly during defense respnses to pathogens. Has paralog NOG1-2.	-0.72379
AT1G52980	Encodes a GTPase that belongs to the subfamily of YlqF/YawG GTPases. Functions in Pre-60S ribosomal subunit maturation. The mRNA is cell-to-cell mobile.	-0.729352
AT1G56045	Ribosomal protein L41 family	0.935149
AT1G56070	encodes a translation elongation factor 2-like protein that is involved in cold-induced translation. Mutations in this gene specifically blocks low temperature-induced transcription of cold-responsive genes but induces the expression of CBF genes and mutants carrying the recessive mutations fail to acclimate to cold and is freezing sensitive.	-1.06343
AT1G61580	R-protein L3 B	-1.00808
AT1G61870	Generic translation factor involved in mitochondrial translation.	-0.76498
AT1G62750	Nuclear encoded protein consists of the five domains conserved in EF-G proteins, with two GTP-binding sites in the first domain, and an additional transit peptide at the N-terminus. Localized in chloroplasts. Point mutation results in a delay in the onset of germination. At early developmental stage embryos still contain undifferentiated proplastids. The greening of cotyledons is severely impaire…	-1
AT1G64790	ILITHYIA (ILA) is a HEAT repeat protein involved in plant immunity. The gene is also involved in systemic acquired resistance induced by P. syringae expressing avrRps4. Loss-of-function mutants of ILA caused pleiotropic defects in the mutant plants. The mutant plants are smaller in size and the leaves are serrated and yellow to light green in color. Required for bacterium-triggered stomatal closu…	-1.25987
AT1G64880	Ribosomal protein S5 family protein	-1.06301
AT1G67120	Represents a homolog of the yeast MDN gene, which encodes a non-ribosomal protein involved in the maturation and assembly of the 60S ribosomal subunit. In Arabidopsis, it is essential for female gametogenesis progression.	-1.64636
AT1G69070	nucleolar-like protein	-0.922595
AT1G72340	NagB/RpiA/CoA transferase-like superfamily protein	-0.993367
AT1G72440	Encodes SLOW WALKER2 (SWA2), a NOC1/Mak21 homologue. Essential for coordinated cell cycle progression during female gametophyte development.	-1.20163
AT1G76810	eukaryotic translation initiation factor 2 (eIF-2) family protein	-1.26748
AT2G04842	Encodes a dual localized threonyl-tRNA synthetase found both in the mitochondrion and the chloroplast. Plants mutated in this gene terminate as embryos in the globular stage.	-0.990219
AT2G15910	CSL zinc finger domain-containing protein	1.02714
AT2G17250	Encodes a nucleolar protein that is a ribosome biogenesis co-factor. Mutants display aberrant RNA processing and homozygous embryos arrest in the globular stage of development.	-0.9631
AT2G23350	polyadenylate-binding protein, putative / PABP, putative.Member of the Class II family of PABP proteins. Highly and ubiquitously expressed. The mRNA is cell-to-cell mobile.	-0.826668
AT2G25210	Ribosomal protein L39 family protein	0.673019
AT2G25840	Nucleotidylyl transferase superfamily protein	-0.718229
AT2G34970	Trimeric LpxA-like enzyme	-1.01527
AT2G40290	Encodes an eIF2alpha homolog that can be phosphorylated by GCN2 in vitro.	-0.787696
AT2G40360	Encodes BOP1, an ortholog of Block of cell proliferation (BOP) protein. A T-DNA null allele of the BOP1 gene is lethal, and a 50% decrease in transcript accumulation is sufficient to cause severe developmental defects linked to defective cell division.	-0.986061
AT2G40660	Nucleic acid-binding, OB-fold-like protein	-0.871676
AT2G45030	Translation elongation factor EFG/EF2 protein	-1.33703
AT2G47990	Encodes a transducin family nucleolar protein with six WD40 repeats that is most likely involved in 18S rRNA biogenesis. The slow progression of the gametophytic division cycles in swa1 suggested that the SWA1 protein is required for the normal progression of mitotic division cycles through the regulation of cell metabolism. Ubiquitously expressed throughout the plant.	-0.776104
AT2G48120	The pale cress (pac) mutant affects chloroplast and leaf development; mutants are ABA-deficient and accumulate lower levels of carotenoids and chlorophyll compared to wild type. PAC binds 23srRNA and appears to be required for 50s ribosome assembly. Three alternative transcripts of this gene exist.PAC is essential for photoautotrophic growth and associates with psbK-psbI, ndhF, ndhD, and 23S ribo…	-0.626025
AT3G01790	Ribosomal protein L13 family protein	-0.787592
AT3G02660	Tyrosyl-tRNA synthetase, class Ib, bacterial/mitochondrial	-1.29917
AT3G02760	Class II aaRS and biotin synthetases superfamily protein	-0.72316
AT3G04480	endoribonuclease	-0.837729
AT3G04770	40s ribosomal protein SA B	-0.984403
AT3G06530	ARM repeat superfamily protein	-1.44652
AT3G07050	Arabidopsis NSN1 encodes a nucleolar GTP- binding protein and is required for maintenance of inflorescence meristem identity and floral organ development.	-1.04654
AT3G07300	NagB/RpiA/CoA transferase-like superfamily protein	-0.77961
AT3G09630	Ribosomal protein L4/L1 family	-0.667425
AT3G10530	Transducin/WD40 repeat-like superfamily protein	-1.57845
AT3G11710	lysyl-tRNA synthetase 1	-0.961932
AT3G11964	Encodes a nucleolar protein that is a ribosome biogenesis co-factor. Mutants display aberrant RNA processing and female gametophyte development.	-1.5025
AT3G12270	protein arginine methyltransferase 3	-0.857981
AT3G13490	Encodes a dual targeted lysyl-tRNA ligase that is found both in the mitochondrion and the chloroplast. Plants mutated in this gene exhibit an ovule abortion phenotype.	-0.697971
AT3G16810	Encodes a member of the Arabidopsis Pumilio (APUM) proteins containing PUF domain (eight repeats of approximately 36 amino acids each). PUF proteins regulate both mRNA stability and translation through sequence-specific binding to the 3' UTR of target mRNA transcripts.	-1.10512
AT3G18130	Encodes a protein with similarity to mammalian RACKs. RACKs function to shuttle activated protein kinase C to different subcellular sites and may also function as a scaffold through physical interactions with other proteins. RACK1C has no phenotype on its own and probably acts redundantly with RACK1A and RACK1B.	-0.607683
AT3G21540	transducin family protein / WD-40 repeat family protein	-1.36678
AT3G22980	Ribosomal protein S5/Elongation factor G/III/V family protein	-1.074
AT3G25920	encodes a plastid ribosomal protein CL15, a constituent of the large subunit of the ribosomal complex	-0.596103
AT3G26618	eukaryotic release factor 1-3	-1.12433
AT3G48110	glycine-tRNA ligase	-0.905673
AT3G49990	Low temperature viability protein	-1.1021
AT3G55170	Ribosomal L29 family protein	0.687213
AT3G56150	member of eIF3c - eukaryotic initiation factor 3c	-1
AT3G56340	Small ribosomal subunit protein.	0.726435
AT3G57490	Ribosomal protein S5 family protein	-1.1943
AT3G58140	phenylalanyl-tRNA synthetase class IIc family protein	-0.902976
AT3G59630	diphthamide synthesis DPH2 family protein	-0.826851
AT3G60240	protein synthesis initiation factor 4G (EIF4G). A mutation in this gene (cum2-1) results in decreased accumulation of CMV coat protein in upper, uninoculated leaves. Likely affects cell-to-cell movement of the virus, also affects TCV multiplication.	-0.712198
AT3G62120	Encodes a cytosolic prolyl-tRNA synthetase.	-0.877516
AT3G62910	Encodes a plastid-localized ribosome release factor 1 that is essential in chloroplast development. Pale green, albino mutant seedlings arrest early in seedling development.	-0.667924
AT4G02400	U3 ribonucleoprotein (Utp) family protein	-1.04731
AT4G02930	GTP binding Elongation factor Tu family protein	-0.783682
AT4G04350	tRNA synthetase class I (I, L, M and V) family protein	-1.0126
AT4G05410	Encodes a nucleolar protein with seven WD40-repeats that plays a role in embryo sac development and is critical for the correct positioning of the division plane of zygote and the apical cell lineage in Arabidopsis. YAO may act by modulating nucleolar function, such as rRNA biogenesis, during early embryogenesis and gametogenesis.	-0.923038
AT4G07410	Encodes a WD-40 protein expressed both during embryo development and postembryonically in the SAM and RAM that functions in the auxin pathway, integrating auxin signaling in the organization and maintenance of the SAM and RAM.	-0.648156
AT4G10320	tRNA synthetase class I (I, L, M and V) family protein	-1
AT4G11120	translation elongation factor Ts (EF-Ts)	-1.17154
AT4G11160	Translation initiation factor 2, small GTP-binding protein	-0.628031
AT4G11420	Encodes a subunit of eukaryotic initiation factor 3 (eIF3), a multisubunit complex that is required for binding of mRNA to 40 S ribosomal subunits, stabilization of ternary complex binding to 40 S subunits, and dissociation of 40 and 60 S subunits.	-1.07682
AT4G13780	methionine-tRNA ligase, putative / methionyl-tRNA synthetase, putative / MetRS	-0.784832
AT4G17300	Asparaginyl-tRNA synthetase protein involved in amino acid activation/protein synthesis.	-1.03076
AT4G19210	member of RLI subfamily The mRNA is cell-to-cell mobile.	-0.871844
AT4G20360	Nuclear transcribed, plastid localized EF-Tu translation elongation factor. Referred to as AtRabE1b in DOI:10.1104/pp.013052. However, wider community usage and more publications assign the symbol RabE1b to At5g59840.	-0.76827
AT4G25890	60S acidic ribosomal protein family	0.632629
AT4G26300	Arginyl-tRNA synthetase, class Ic	-0.892085
AT4G26600	S-adenosyl-L-methionine-dependent methyltransferases superfamily protein	-0.948285
AT4G27130	Translation initiation factor SUI1 family protein	0.845025
AT4G28200	U3 small nucleolar RNA-associated-like protein	-0.940057
AT4G28450	This gene is predicted to encode a protein with a DWD motif. It can bind to DDB1a in Y2H assays and may be involved in the formation of a CUL4-based E3 ubiquitin ligase	-0.993367
AT4G29060	elongation factor Ts family protein	-1.27684
AT4G29430	ribosomal protein S15A E	0.616671
AT4G31790	Tetrapyrrole (Corrin/Porphyrin) Methylase	-0.636409
AT4G31985	Ribosomal protein L39 family protein	0.686501
AT4G33760	tRNA synthetase class II (D, K and N) family protein	-1.1669
AT4G33865	Ribosomal protein S14p/S29e family protein	0.622633
AT4G36420	Ribosomal protein L12 family protein	-0.598259
AT4G37660	Ribosomal protein L12/ ATP-dependent Clp protease adaptor protein ClpS family protein	0.730503
AT5G02870	Ribosomal protein L4/L1 family	-0.623852
AT5G05470	Encodes an eIF2alpha homolog that can be phosphorylated by GCN2 in vitro.	-0.899473
AT5G09770	Ribosomal protein L17 family protein	0.612074
AT5G11010	Pre-mRNA cleavage complex II protein family	-0.874469
AT5G11750	Ribosomal protein L19 family protein	-0.644905
AT5G12220	las1-like family protein	-0.740613
AT5G13510	Ribosomal protein L10 family protein	0.6772
AT5G14520	Encodes a nucleolar protein that plays an essential role in cell growth and survival through its regulation of ribosome biogenesis and mitotic progression.	-0.778973
AT5G15550	Transducin/WD40 repeat-like superfamily protein	-1.47999
AT5G15610	Proteasome component (PCI) domain protein	-0.606179
AT5G16715	protein EMBRYO DEFECTIVE 2247	-1.08746
AT5G16750	Encodes a nucleolar localized WD-40 repeat protein that is preferentially expressed in dividing cells and is required for regulated division planes and embryo development.	-0.827533
AT5G20920	protein synthesis initiation factor eIF2 beta	-0.628031
AT5G22800	A locus involved in embryogenesis. Mutations in this locus result in embryo lethality.	-1.21842
AT5G23535	KOW domain-containing protein	0.787903
AT5G24490	30S ribosomal protein	-0.712718
AT5G25780	member of eIF3b - eukaryotic initiation factor 3b	-1.31342
AT5G26710	Glutamyl/glutaminyl-tRNA synthetase, class Ic	-0.843598
AT5G26830	Encodes a dual-targeted threonyl-tRNA synthetase found in both the chloroplast and mitochondrion. The mRNA is cell-to-cell mobile.	-0.780219
AT5G27470	seryl-tRNA synthetase / serine-tRNA ligase	-0.843598
AT5G27640	encodes a member of eukaryotic translation initiation factor 3B family.	-1.01089
AT5G30510	ribosomal protein S1	-0.597241
AT5G38830	Cysteinyl-tRNA synthetase, class Ia family protein	-0.817456
AT5G41190	Encodes a cytoplasmic protein with RNA endonuclease activity. Mutants display aberrant RNA processing and male and female gametophyte development.	-0.804984
AT5G47320	Nuclear encoded mitochondrial ribosome subunit. The mRNA is cell-to-cell mobile.	-0.66862
AT5G47880	Encodes a eukaryotic release factor 1 homolog. Cosuppression of the gene's expression results affects cell elongation of the inflorescence stem, specifically the internodes, and radial cell division. Expression of the protein is primarily observed in the vascular system and in actively growing and elongating zones.	-0.712718
AT5G49030	tRNA synthetase class I (I, L, M and V) family protein	-0.968973
AT5G52520	Encodes a chloroplast and mitochondria localized prolyl-tRNA synthetase.	-1.00799
AT5G54760	Translation initiation factor SUI1 family protein	0.60245
AT5G55140	ribosomal protein L30 family protein	0.810339
AT5G55920	Encodes a homolog of the S. cerevisiae Nop2 that is involved in ribosome biogenesis and plays a role on organ size control by promoting cell proliferation and preventing compensation in normal leaf development.	-1.30986
AT5G56680	Encodes a putative cytosolic asparaginyl-tRNA synthetase. The mRNA is cell-to-cell mobile.	-0.925999
AT5G60390	GTP binding Elongation factor Tu family protein	-0.62532
AT5G60960	Encodes PNM1 (for PPR protein localized to the nucleus and mitochondria 1), a PPR protein that is dual localized to mitochondria and nuclei. Loss of PNM1 function in mitochondria, but not in nuclei, is lethal for the embryo. In mitochondria, it is associated with polysomes and may play a role in translation.	-0.595851
AT5G64050	Glutamate-tRNA ligase. Targeted to mitochondria and chloroplast. Its inactivation causes developmental arrest of chloroplasts and mitochondria in Nicotiana benthamiana.	-0.665882
AT5G64140	Encodes a putative ribosomal protein S28.	0.728516
AT5G64650	Ribosomal protein L17 family protein	1.40858
AT5G66540	U3 small nucleolar ribonucleoprotein	-1.25192
ATCG00160	Chloroplast ribosomal protein S2	-1.93289
ATCG00380	Chloroplast encoded ribosomal protein S4	-0.667425
ATCG00660	encodes a chloroplast ribosomal protein L20, a constituent of the large subunit of the ribosomal complex	-1.05889
ATCG00750	30S chloroplast ribosomal protein S11	-1.18057
ATCG00760	encodes a chloroplast ribosomal protein L36, a constituent of the large subunit of the ribosomal complex	-1.36257
ATCG00770	chloroplast 30S ribosomal protein S8	-1.36678
ATCG00780	encodes a chloroplast ribosomal protein L14, a constituent of the large subunit of the ribosomal complex	-1.12928
ATCG00790	chloroplast gene encoding a ribosomal protein L16, which is a constituent of 50S large ribosomal subunit	-1.24793
ATCG00800	encodes a chloroplast ribosomal protein S3, a constituent of the small subunit of the ribosomal complex	-1.24793
ATCG00810	encodes a chloroplast ribosomal protein L22, a constituent of the large subunit of the ribosomal complex	-1.22239
ATCG00820	Encodes a 6.8-kDa protein of the small ribosomal subunit.	-1
ATCG01120	encodes a chloroplast ribosomal protein S15, a constituent of the small subunit of the ribosomal complex	-1.44057

## Sheet: Cytoskeleton
Locus identifier	Gene Model Description	log2(larp1/WT) translation efficiency
AT1G01950	Encodes a member of the armadillo/beta-catenin repeat kinesin motor family. Mutants have twisted roots due to abnormal cell file rotation; the phenotype is dependent on microtubules.	-1.15843
AT1G12430	Encodes the kinesin-like protein PAK has an Armadillo motif tail and is involved in guard cell development in Arabidopsis (from Genbank record AF159052).However, no defect in stomatal complexes has been observed in loss of function mutations. It accumulates at the preprophase band (PPB) in a cell-cycle and microtubule-dependent manner and is most highly expressed in cells where the placement of t…	-1
AT1G21730	P-loop containing nucleoside triphosphate hydrolases superfamily protein	-1.12676
AT1G63640	P-loop nucleoside triphosphate hydrolases superfamily protein with CH (Calponin Homology) domain-containing protein	-1
AT2G21300	ATP binding microtubule motor family protein	-1.23704
AT2G28620	Mutants have radially swollen roots but do not exhibit defects in abundance or orientation of cortical microtubules, nor are microfibrils reduced. Cellulose synthesis is also unchanged with respect to wild type. There is a disruption in the normal pattern of cell wall placement.	-1.09785
AT2G36200	P-loop containing nucleoside triphosphate hydrolases superfamily protein	-0.972693
AT2G47500	P-loop nucleoside triphosphate hydrolases superfamily protein with CH (Calponin Homology) domain-containing protein	-1.05364
AT3G12020	P-loop containing nucleoside triphosphate hydrolases superfamily protein	-0.823122
AT3G20150	Kinesin motor family protein	-0.647698
AT3G45850	P-loop containing nucleoside triphosphate hydrolases superfamily protein	-0.941106
AT3G50240	Encodes a kinesin-related protein.	-1
AT3G51150	ATP binding microtubule motor family protein	-0.736966
AT4G05190	ATK5 encodes a kinesin protein involved in microtubule spindle morphogenesis. It acts as a minus-end directed motor as well as a plus-end tracking protein (+TIP). Localizes to mitotic spindle midzones and regions rich in growing plus-ends within phragmoplasts.	-1.32805
AT4G27180	kinesin heavy chain subunit	-1.12338
AT4G38950	ATP binding microtubule motor family protein	-0.791413
AT4G39050	Kinesin motor family protein	-0.843881
AT5G27550	P-loop containing nucleoside triphosphate hydrolases superfamily protein	-1.19592
AT5G47820	encodes a kinesin-like protein with an N-terminal microtubule binding motor domain. Protein is localized to the periphery of the cytoplasm and mutants in the gene exhibit altered orientation of cellulose microfibrils and reduced mechanical strength of fibers.	-1.17971
AT5G54670	Encodes a truncated KatC polypeptide (KatC(207-754)), which includes the carboxyl-terminal region of KatC. This was expressed in Escherichia coli and was shown to possess microtubule-stimulated ATPase activity.	-1.35091
AT5G60930	P-loop containing nucleoside triphosphate hydrolases superfamily protein	-1.45066
AT5G65930	encodes a novel member of the kinesin superfamily of motor proteins. recessive mutations have reduced number of trichome branches.	-0.750641
AT5G66310	ATP binding microtubule motor family protein	-0.744743
