# Supplementary material for: Parallel global profiling of plant TOR dynamics reveals a conserved role for LARP1 in translation
Source: eLife. 2020 Oct 15;9:e58795. doi: 10.7554/eLife.58795 (PMC7584452; doi:10.7554/eLife.58795)
Supplement: Supplementary file 8. — Table presents the fold-change of mRNA levels of the genes from the different categories, as determined by Mapman analysis. These data are represented as a box-whisker plot in Figure 4D. [file elife-58795-supp8.xlsx]

## Sheet: Biotic stress
Locus identifier	Gene Model Description	log2(larp1+T2/larp1) mRNA levels
AT1G07570	Protein kinase capable of phosphorylating tyrosine, serine, and threonine residues	0.578918
AT1G66090	Disease resistance protein (TIR-NBS class)	2.32884
AT1G73080	Encodes a leucine-rich repeat receptor kinase. Functions as a receptor for AtPep1 to amplify innate immunity response to pathogen attacks. The mRNA is cell-to-cell mobile.	0.426791
AT1G74360	NILR1 encodes a serine/threonine kinase involved in defense response to nematodes.	1.62285
AT2G02180	Necessary for the efficient multiplication of tobamoviruses. The mRNA is cell-to-cell mobile.	0.583152
AT2G05940	Encodes a receptor-like cytoplasmic kinase that phosphorylates the host target RIN4, leading to the activation of a plant innate immune receptor RPM1.	1.14803
AT2G20142	Toll-Interleukin-Resistance (TIR) domain family protein	2.21338
AT2G23460	encodes a novel G-alpha protein that shares similarity to plant, yeast, and animal G-alpha proteins at the C-terminus. It contains an N-terminus that is as large as the C-terminus, is a member of a small family, and is expressed in all tissues examined, including roots, leaves, stems, flowers, and fruits.	0.423428
AT2G23770	Encodes a putative LysM-containing receptor-like kinase LYK4. Shares overlapping function with LYK5 in mediating chitin-triggered immune responses. Based on protein sequence alignment analysis, it was determined as a pseudo kinase due to a lack of the ATP-binding P-loop in the kinase domain.	0.836424
AT2G32140	transmembrane receptor	3.29411
AT3G04210	TN13 is a TIR-NBS protein involved in immune response. It co localizes with the ER and perinuclear membranes and interacts with MOS6.	1.83878
AT3G04220	Disease resistance protein (TIR-NBS-LRR class) family	3.78227
AT3G25070	Encodes a member of the R protein complex and may represent a virulence target of type III pili effector proteins (virulence factors) from bacterial pathogens, which is 'guarded' by R protein complex (RPM1 and RPS2 proteins). RIN4 physically interacts with RPS2 and RPM1 in vivo. Bacterial avirulence (Avr) effectors AvrB, AvrRpm1, and AvrRpt2 induce a mobility shift in RIN4 and expression of AvrRp…	0.750703
AT3G48090	Component of R gene-mediated disease resistance in Arabidopsis thaliana with homology to eukaryotic lipases.	0.844905
AT3G52430	Encodes a lipase-like gene that is important for salicylic acid signaling and function in resistance (R) gene-mediated and basal plant disease resistance. PAD4 can interact directly with EDS1, another disease resistance signaling protein. Expressed at elevated level in response to green peach aphid (GPA) feeding, and modulates the GPA feeding-induced leaf senescence through a mechanism that doesn…	0.976274
AT3G63420	heterotrimeric G protein gamma-subunit (AGG1) mRNA,	0.988834
AT4G11170	Encodes RMG1 (Resistance Methylated Gene 1), a NB-LRR disease resistance protein with a Toll/interleukin-1 receptor (TIR) domain at its N terminus. RMG1 is expressed at high levels in response to flg22 and in naive met1/nrpd2 relative to wild-type plants. Expression of this gene is controlled by DNA methylation in its promoter region. The RMG1 promoter region is constitutively demethylated by act…	4.20972
AT4G11260	Functions in plant disease resistance signaling, SCF(TIR1) mediated degradation of Aux/IAA proteins and HSP90 mediated degradation of R resistance proteins. AtSGT1a and AtSGT1b are functionally redundant in the resistance to pathogenes. AtSGT1b was more highly expressed than AtSGT1. The N-terminal TPR domain of AtSGT1a reduces the steady-state level of Arabidopsis SGT1 proteins whereas the same d…	-0.401689
AT4G14370	Disease resistance protein (TIR-NBS-LRR class) family	1.78465
AT4G19500	nucleoside-triphosphatase/transmembrane receptor/nucleotide binding/ATP binding protein	-0.559128
AT4G26120	Ankyrin repeat family protein / BTB/POZ domain-containing protein	1.74131
AT4G34390	extra-large GTP-binding protein 2	0.857942
AT4G34460	Encodes the heterotrimeric G-protein beta subunit and is involved in organ shape. A significant fraction of the protein is found in the ER. Mutants carrying null alleles express similar fruit phenotypes, as seen in er plants, but differ from er in that the stem is only slightly shorter than that in the wild type, the pedicel is slightly longer than that in the wild type, and the leaves are rounde…	0.448283
AT5G02290	Encodes a candidate protein kinase NAK that is similar to the oncogenes met and abl.	0.636182
AT5G02800	Encodes CDL1, a homolog of CDG1. CDL1 positively regulates brassinosteroid signaling and plant growth.	0.569594
AT5G35580	Protein kinase superfamily protein	2.03185
AT5G41740	Disease resistance protein (TIR-NBS-LRR class) family	0.757318
AT5G41750	Disease resistance protein (TIR-NBS-LRR class) family	3.85722
AT5G51630	Disease resistance protein (TIR-NBS-LRR class) family	0.681497

## Sheet: Autophagy
Locus identifier	Gene Model Description	log2(larp1+T2/larp1) mRNA levels
AT1G03380	yeast autophagy 18 G-like protein	0.733855
AT1G17780	ATG8A/F interacting protein containing a WxxL LIR motif at the C terminus which is essential for interaction with ATG8. Stress (abiotic or biotic) results in the formation of ATG8- and ATI3-labeled punctate structures, likely reflecting increased formation of ATG8-labeled phagophores or autophagosomes. ATI3 proteins probably act as selective autophagy receptors that target specific cellular compo…	1.01524
AT1G54210	Ubiquitin-like superfamily protein	1.59614
AT1G54710	autophagy 18h-like protein	0.758191
AT1G62040	Autophagy protein.	1.0878
AT2G05630	in the Arabidopsis autophagy pathway	1.04021
AT2G31130	hypothetical protein	0.738457
AT2G31260	Involved in autophagy, the process of vacuolar bulk degradation of cytoplasmic components. Mutant shows accelerated bolting and senescence.	0.815363
AT2G40810	yeast autophagy-like protein	0.698062
AT2G44140	Peptidase family C54 protein	0.525747
AT2G45170	Involved in autophagy. Under nutrient starvation the protein localizes to autophagosomes.	1.39179
AT2G45980	Encodes an Atg8-interacting protein that is partially associated with the ER during favorable growth conditions and becomes mainly associated with a spherical compartment that dynamically moves along the ER network. In stress induced plants, ATI1 is localized to a novel plastid associated bodies that are transported to vesicles, in what appears to be an autophagy dependent process. ATI1 interacts…	0.359662
AT3G06420	Autophagy protein.	1.10223
AT3G15580	Encodes APG8, a component of autophagy conjugation pathway. Delivered to the lumens of vacuole under nitrogen-starvation condition.	1.43189
AT3G18770	Autophagy-related protein 13	0.936935
AT3G49590	Autophagy-related protein 13	0.531962
AT3G60640	Autophagy protein.	1.2467
AT3G61960	Protein kinase superfamily protein	0.821409
AT3G62770	Required for autophagosome formation during nutrient deprivation and senescence, promotes pexophagy during seedling development.	0.727961
AT4G00355	Encodes an Atg8-interacting protein that is partially associated with the ER during favorable growth conditions and becomes mainly associated with a spherical compartment that dynamically moves along the ER network.	1.17149
AT4G04620	Autophagy protein.	1.08973
AT4G16520	Autophagy protein.	1.42611
AT4G21980	Encodes APG8, a component of autophagy conjugation pathway. Delivered to the lumens of vacuole under nitrogen-starvation condition. Highest expression in flowers. mRNA abundance increased during dark-induced carbon starvation. Predominantly cytoplasmic with or without N starvation. Upon concanamycin A the protein accumulates in the central vacuole as punctuate structures that resemble autophagic …	1.23051
AT4G30790	Encodes autophagy-related 2 (ATG11)	0.930731
AT5G17290	Autophagy protein ATG5. Forms a conjugate with ATG12 with an essential role in plant nutrient recycling. Mutants missing ATG5 display early senescence and are hypersensitive to nitrogen or carbon starvation, accompanied by a more rapid loss of organellar and cytoplasmic proteins.	0.695696
AT5G54730	yeast autophagy 18 F-like protein	0.811952
AT5G61500	autophagy-related (ATG) gene	0.75509
AT5G66930	meiotically up-regulated protein	0.967619

## Sheet: Photophosphorylation
Locus identifier	Gene Model Description	log2(larp1+T2/larp1) mRNA levels
AT1G08380	Encodes subunit O of photosystem I.	0.731186
AT1G14150	Encodes a subunit of the NAD(P)H dehydrogenase complex located in the chloroplast thylakoid lumen.	0.737929
AT1G15980	encodes a novel subunit of the chloroplast NAD(P)H dehydrogenase complex, involved in cyclic electron flow around photosystem I to produce ATP.	0.462713
AT1G16720	Encodes HCF173, a protein with weak similarities to the superfamily of the short-chain dehydrogenases/reductases. HCF173 is involved in the initiation of translation of the psbA mRNA. Mutants shows a high chlorophyll fluorescence phenotype (hcf) and are severely affected in the accumulation of PSII subunits. The protein HCF173 is localized in the chloroplast, where it is mainly associated with th…	0.733315
AT1G18730	likely a subunit of the chloroplast NAD(P)H dehydrogenase complex, involved in PSI cyclic electron transport. Located on the thylakoid membrane. Mutant has impaired NAD(P)H dehydrogenase activity. The mRNA is cell-to-cell mobile.	0.524079
AT1G19150	PSI type II chlorophyll a/b-binding protein (Lhca2*1) mRNA, The mRNA is cell-to-cell mobile.	0.79236
AT1G31330	Encodes subunit F of photosystem I.	0.536739
AT1G34000	Encodes a novel member of the Lhc family from Arabidopsis with one predicted transmembrane alpha-helix closely related to helix I of Lhc protein from PSI (Lhca4). Gene expression is triggered by light stress and both transcript and protein accumulate in a light intensity-dependent manner. Ohp2 is associated with PSI under low- or high-light conditions. Together with OHP1, OHP2 is essential for th…	0.718199
AT1G45474	Encodes a component of the light harvesting complex of photosystem I.	0.480829
AT1G51100	potassium/sodium hyperpolarization-activated cyclic nucleotide-gated channel protein	-0.530077
AT1G52230	Phosphorylation of this protein is dependent on calcium. The mRNA is cell-to-cell mobile.	0.718693
AT1G54780	Encodes a thylakoid lumen protein regulating photosystem II repair cycle. Has acid phosphatase activity. The mRNA is cell-to-cell mobile.	0.768051
AT1G61520	PSI type III chlorophyll a/b-binding protein (Lhca3*1) The mRNA is cell-to-cell mobile.	0.365853
AT1G74880	Encodes subunit NDH-O of NAD(P)H:plastoquinone dehydrogenase complex (Ndh complex) present in the thylakoid membrane of chloroplasts. This subunit is thought to be required for Ndh complex assembly.	0.477279
AT1G76100	One of two Arabidopsis plastocyanin genes. Expressed at 1/10th level of PETE2. Does not respond to increased copper levels and is thought to be the isoform that participates in electron transport under copper-limiting conditions. Mutation of this gene does not have obvious effect on photosynthesis.	0.674936
AT2G04039	NdhV is loosely associated with the NDH complex and is required for stabilizing NDH subcomplexes A and E.	0.538441
AT2G05070	Encodes Lhcb2.2. Belongs to the Lhc super-gene family encodes the light-harvesting chlorophyll a/b-binding (LHC) proteins that constitute the antenna system of the photosynthetic apparatus.	0.700899
AT2G05100	Lhcb2.1 protein encoding a subunit of the light harvesting complex II. Member of a gene family with high degree of sequence similarity. Initially LHCB2.3 was considered as a separate gene but appears to be an allele of LHCB2.1.	0.800765
AT2G06520	Encodes a protein with sequence similarity to the spinach photosystem II subunit PsbX.	0.517478
AT2G21970	stress enhanced protein 2 (SEP2) chlorophyll a/b-binding protein	1.15627
AT2G34860	DnaJ/Hsp40 cysteine-rich domain superfamily protein	0.648021
AT2G39470	PsbP-like protein 2	0.572066
AT3G08940	Lhcb4.2 protein (Lhcb4.2, protein involved in the light harvesting complex of photosystem II The mRNA is cell-to-cell mobile.	0.591807
AT3G12345	FKBP-type peptidyl-prolyl cis-trans isomerase	0.715914
AT3G26710	cofactor assembly of complex C	-0.808548
AT3G26740	transcripts are differentially regulated at the level of mRNA stability at different times of day controlled by the circadian clock. mRNAs are targets of the mRNA degradation pathway mediated by the downstream (DST) instability determinant.	1.13811
AT3G27690	Encodes Lhcb2.4. Belongs to the Lhc super-gene family encodes the light-harvesting chlorophyll a/b-binding (LHC) proteins that constitute the antenna system of the photosynthetic apparatus. The mRNA is cell-to-cell mobile.	0.892124
AT3G47470	Encodes a chlorophyll a/b-binding protein that is more similar to the PSI Cab proteins than the PSII cab proteins. The predicted protein is about 20 amino acids shorter than most known Cab proteins.	0.372974
AT3G47860	Encodes a chloroplastic lipocalin AtCHL. Located in thylakoid lumen. Involved in the protection of thylakoidal membrane lipids against reactive oxygen species, especially singlet oxygen, produced upon excess light. LCNP is required for sustained photoprotective energy dissipation or NPQ (qH) to occur (PMID:29233855).	0.733423
AT3G54890	Encodes a component of the light harvesting complex associated with photosystem I.	0.388761
AT4G03280	Encodes the Rieske FeS center of cytochrome b6f complex. Gene is expressed in shoot but not in root. Mutant has reduced electron transport at saturating light intensities and Q-cycle activity is hypersensitive to acidification of the thylakoid lumen. The mRNA is cell-to-cell mobile.	0.377561
AT4G05180	Encodes the PsbQ subunit of the oxygen evolving complex of photosystem II.	0.543317
AT4G09350	Chaperone DnaJ-domain superfamily protein	0.814113
AT4G11960	Encodes PGRL1B, a transmembrane protein present in thylakoids. PGRL1B has a highly homologous isoform PGRL1A encoded by At4g22890. Plants lacking PGRL1 show perturbation of cyclic electron flow, similar to PGR5-deficient plants. PGRL1 and PGR5 interact physically and associate with PSI (photosystem I).	0.64499
AT4G22260	Similar to mitochondrial alternative oxidase. im mutants have a variegated phenotype and fail to differentiate chloroplasts in the majority of their cells under high light intensity continuous illumination. The white tissues of immutans accumulate phytoene, a non-colored C40 carotenoid intermediate. This suggests that immutans controls, either directly or indirectly, the activity of phytoene desa…	0.546958
AT4G22890	Encodes PGRL1A, a transmembrane protein present in thylakoids. PGRL1A has a highly homologous isoform PGRL1B encoded by At4g11960. Plants lacking PGRL1 show perturbation of cyclic electron flow, similar to PGR5-deficient plants. PGRL1 and PGR5 interact physically and associate with PSI (photosystem I). The mRNA is cell-to-cell mobile.	0.647155
AT4G23890	NAD(P)H-quinone oxidoreductase subunit S	1.40089
AT4G27800	Choroplast protein phosphatase TAP38/PPH1 is required for efficient dephosphorylation of the LHCII anthena and state transition from state 2 to state 1.	0.579325
AT4G28750	mutant has Decreased effective quantum yield of photosystem II; Pale green plants; Reduced growth rate; Subunit E of Photosystem I	0.50115
AT4G37200	Encodes thioredoxin-like protein with disulfide reductase activity that is involved in the biogenesis of the plastid cytochrome b6f complex. Protein is located in the thylakoid membrane with the C-terminal hydrophilic portion, containing the thioredoxin like domain, extending into the thylakoid lumen.	0.753491
AT4G37925	Encodes subunit NDH-M of NAD(P)H:plastoquinone dehydrogenase complex (Ndh complex) present in the thylakoid membrane of chloroplasts. This subunit is thought to be required for Ndh complex assembly.	1.13763
AT5G02120	Encodes a one helix protein homologous to cyanobacterial high-light inducible proteins. The protein is localized to the thylakoid membrane and its transcript is transiently induced by exposure to high light conditions. The mRNA is cell-to-cell mobile.	0.760487
AT5G20935	DUF3148 family protein	0.949433
AT5G38660	mutant has Altered acclimation responses;	0.498887
AT5G43750	NAD(P)H dehydrogenase 18	0.537887
AT5G44650	Encodes a nucleus-encoded thylakoid protein, cooperates with the plastid-encoded Ycf3 protein in photosystem i assembly. Also induces tolerance to multiple environmental stresses and reduces photooxidative damage.	-0.395291
AT5G54290	Encodes CcdA, a thylakoid membrane protein required for the transfer of reducing equivalents from stroma to thylakoid lumen.	0.579931
AT5G64040	Encodes the only subunit of photosystem I located entirely in the thylakoid lumen. May be involved in the interaction between plastocyanin and the photosystem I complex. Phosphorylation of this protein is dependent on calcium.	0.497145
ATCG00020	Encodes chlorophyll binding protein D1, a part of the photosystem II reaction center core	0.584339
ATCG00070	PSII K protein	0.575308
ATCG00080	PSII I protein	0.712098
ATCG00130	ATPase F subunit.	0.38379
ATCG00140	ATPase III subunit	0.481674
ATCG00220	PSII low MW protein	1.00778
ATCG00270	PSII D2 protein	0.441106
ATCG00280	chloroplast gene encoding a CP43 subunit of the photosystem II reaction center. promoter contains a blue-light responsive element.	0.522479
ATCG00300	encodes PsbZ, which is a subunit of photosystem II. In Chlamydomonas, this protein has been shown to be essential in the interaction between PS II and the light harvesting complex II.	0.546113
ATCG00440	Encodes NADH dehydrogenase D3 subunit of the chloroplast NAD(P)H dehydrogenase complex	0.417572
ATCG00510	Encodes subunit I of photosystem I.	0.589988
ATCG00550	PSII component	0.717834
ATCG00560	PSII L protein	0.748447
ATCG00570	PSII cytochrome b559	0.821692
ATCG00580	PSII cytochrome b559. There have been many speculations about the function of Cyt b559, but the most favored at present is that it plays a protective role by acting as an electron acceptor or electron donor under conditions when electron flow through PSII is not optimized.	0.671432
ATCG00590	electron carrier	0.658946
ATCG00630	Encodes subunit J of photosystem I.	0.91276
ATCG00730	A chloroplast gene encoding subunit IV of the cytochrome b6/f complex	0.3867
ATCG01040	Cytochrome C assembly protein	0.364699

## Sheet: Protein degradation
Locus identifier	Gene Model Description	log2(larp1+T2/larp1) mRNA levels
AT1G01300	Eukaryotic aspartyl protease family protein	-0.65139
AT1G02305	Encodes a capase involved in stress induced cell death.	0.475035
AT1G02610	RING/FYVE/PHD zinc finger superfamily protein	1.22152
AT1G04810	26S proteasome regulatory complex, non-ATPase subcomplex, Rpn2/Psmd1 subunit	-0.658712
AT1G04860	Encodes a ubiquitin-specific protease.	-0.659972
AT1G05180	Encodes a subunit of the RUB1 activating enzyme that regulates the protein degradation activity of Skp1-Cullin-Fbox complexes, primarily, but not exclusively, affecting auxin responses. Acts alongside AS1 to exclude BP expression from leaves. Promotes degradation of the cytokinin response repressor ARR5.	-0.609841
AT1G05350	NAD(P)-binding Rossmann-fold superfamily protein	-0.761844
AT1G05690	BTB and TAZ domain protein. Acts redunantly with BT1 and BT2 during female gametophyte development. Acts with BT2 during male gametophyte development.	0.998043
AT1G05840	Eukaryotic aspartyl protease family protein	0.65934
AT1G06900	Insulinase (Peptidase family M16) family protein	-1.16312
AT1G08050	Zinc finger (C3HC4-type RING finger) family protein	1.05647
AT1G13195	RING/U-box superfamily protein	1.45809
AT1G14400	ubiquitin carrier protein	0.740473
AT1G19310	RING/U-box superfamily protein	0.864772
AT1G21410	AtSKP2;1 is a homolog of human SKP2, the human F-box protein that recruits E2F1. Contains an F-box motif at the N-terminal region and a C-terminal Leu-rich repeat domain. Forms part of an E3-ubiquitin-ligase SCF (Skp1, cullin, F-box) complex and recruits phosphorylated AtE2Fc, a transcriptional factor that might play a role in cell division and during the transition from skotomorphogenesis to pho…	0.930578
AT1G22920	AJH1 encodes a protein similar to JAB1, a specific mammalian coactivator of AP-1 transcription. Encodes a subunit of the COP9 complex that is involved in protein deneddylation. Plants with mutations in CSN5A and CSN5B have a de-etiolated phenotype.	-0.524815
AT1G23260	MMZ1/UEV1A encodes a protein that may play a role in DNA damage responses and error-free post-replicative DNA repair by participating in lysine-63-based polyubiquitination reactions. UEV1A can form diubiquitin and triubiquitin chains in combination with UBC13A/UBC35 in vitro. It can also functionally complement an mms2 mutation in budding yeast, both by increasing mms2 mutant viability in the pre…	1.0225
AT1G23440	Peptidase C15, pyroglutamyl peptidase I-like protein	1.07684
AT1G24140	Matrixin family protein	2.89912
AT1G24440	RING/U-box superfamily protein	0.652039
AT1G25510	Eukaryotic aspartyl protease family protein	-0.976538
AT1G35340	ATP-dependent protease La (LON) domain protein	0.632856
AT1G44130	Eukaryotic aspartyl protease family protein	3.47016
AT1G49050	Encodes a member of the aspartyl protease family. Interacts with BAGP1 and BAG6 and appears to be required for cleavage of BAG6 as BAG6 is not cleaved in APCB1 mutant backgrounds.	0.624542
AT1G50250	encodes an FTSH protease that is localized to the chloroplast. Involved in the D1 repair cycle of Photosystem II. FtsH1 and FtsH5 are interchangeable in thylakoid membranes.	0.433748
AT1G53190	Encodes a RING-type E3 ligase that positively regulates CIN-like TCP activity to promote leaf development by mediating the degradation of the TCP repressor TIE1.	0.666189
AT1G55350	Similar to maize DEK1, a gene encoding a membrane protein of the calpain gene superfamily required for aleurone cell development in the endosperm of maize grains. A key component of the embryonic L1 cell-layer specification pathway. It localizes to membranes and undergoes intramolecular autolytic cleavage events that release the calpain domain into the cytoplasm.	-0.686222
AT1G55860	encodes a ubiquitin-protein ligase containing a HECT domain. There are six other HECT-domain UPLs in Arabidopsis.	-0.388362
AT1G63120	AtRBL2 has been identified as a rhomboid protein involved in regulated intramembrane proteolysis (RIP). The enzyme has the proteolytic activity and substrate specificity comparable to the Drosophila Rho-1 protein.	0.665259
AT1G63800	ubiquitin-conjugating enzyme 5	1.5033
AT1G63840	RING/U-box superfamily protein	1.05897
AT1G63900	Encodes a RING-type ubiquitin E3 ligase of the chloroplast outer membrane that associates with TOC complexes and mediates ubiquitination of TOC components, promoting their degradation. It not only regulates chloroplast protein import but also targets components of the peroxisome protein import apparatus, PEX13 in particular. Several studies have been done to examine the peroxisomal localization o…	0.718769
AT1G66180	The gene encodes a putative aspartyl protease (ASP). Its expression is induced in response to light and ascorbate. The mRNA is cell-to-cell mobile.	0.34865
AT1G68660	ClpS1 is a member of the caseionolytic proteinase S family of N-recognins. It is involved in proteolysis in the chloroplast stroma. An arginine residue (Arg50) controls low-affinity substrate binding.	0.797457
AT1G70170	mutant has Late flowering; Early senescence; Matrix Metalloproteinase	1.39878
AT1G70320	encodes a ubiquitin-protein ligase-like protein containing a HECT domain. There are six other HECT-domain UPLs in Arabidopsis.	-0.724153
AT1G70660	MMZ2/UEV1B encodes a protein that may play a role in DNA damage responses and error-free post-replicative DNA repair by participating in lysine-63-based polyubiquitination reactions. UEV1A can form diubiquitin and triubiquitin chains in combination with UBC13A/UBC35 in vitro. It can also functionally complement an mms2 mutation in budding yeast, both by increasing mms2 mutant viability in the pre…	1.17784
AT1G73760	RING/U-box superfamily protein	-0.670993
AT1G74410	RING/U-box superfamily protein	1.75739
AT1G75460	ATP-dependent protease La (LON) domain protein	0.979235
AT1G77000	AtSKP2;2 is a homolog of human SKP2, the human F-box protein that recruits E2F1. Contains an F-box motif at the N-terminal region and a C-terminal Leu-rich repeat domain. Forms part of an E3-ubiquitin-ligase SCF (Skp1, cullin, F-box) complex and recruits phosphorylated AtE2Fc, a transcriptional factor that might play a role in cell division and during the transition from skotomorphogenesis to pho…	1.1187
AT1G77710	ubiquitin-fold modifier	0.663639
AT1G79380	Encodes a ubiquitin ligase that is an essential upstream modulator of JA signaling in response to various stimuli.	0.675538
AT1G79560	Encodes an FtsH protease that is localized to the chloroplast and is part of a membrane localized translocation motor complex .Strong interaction with TIC inner envelope protein translocon which consists of Tic20/Tic56/Tic100/Tic214(Ycf1)(DOI:10.1105/tpc.18.00357). Mutations in this locus result in embryo lethality.	-0.520001
AT1G79720	Eukaryotic aspartyl protease family protein	0.514737
AT1G80400	RING/U-box superfamily protein	0.781819
AT2G03390	uvrB/uvrC motif-containing protein	0.524958
AT2G05920	Subtilase family protein	-0.465182
AT2G21470	Encodes one of the two subunits of the SUMO activation enzyme required during sumolation. Sumolation is a post-translational protein modification process similar to ubiquitination during which a polypeptide (SUMO) is covalently attached to a target protein.	-0.423294
AT2G22970	serine carboxypeptidase-like 11	-1.0064
AT2G26140	Encodes an FtsH protease that is localized to the mitochondrion. Loss of function results in increased determinacy of the meristem that is exacerbated when plants are grown at higher temperatures.	-0.381388
AT2G30110	Encodes a ubiquitin-activating enzyme (E1), involved in the first step in conjugating multiple ubiquitins to proteins targeted for degradation. Gene is expressed in most tissues examined. Mutant is able to revert the constitutive defense responses phenotype of snc1, which indicates the gene is involved in defense response. It also indicates that ubiquitination plays a role in plant defense signal…	-0.327065
AT2G31510	IBR domain-containing protein	0.419364
AT2G32560	F-box family protein	0.834764
AT2G33530	serine carboxypeptidase-like 46	0.437742
AT2G35635	encodes a ubiquitin-like protein that contains tandem repeats of the ubiquitin coding region, but at least one repeat per gene encodes a protein with amino acid substitutions. The mRNA is cell-to-cell mobile.	0.436578
AT2G36060	MMZ3/UEV1C encodes a protein that may play a role in DNA damage responses and error-free post-replicative DNA repair by participating in lysine-63-based polyubiquitination reactions. UEV1C can form diubiquitin and triubiquitin chains in combination with UBC13A/UBC35 in vitro. It can also functionally complement an mms2 mutation in budding yeast, both by increasing mms2 mutant viability in the pre…	0.442931
AT2G37150	RING/U-box superfamily protein	0.753585
AT2G41980	SINAT1 is an E3 ligase involved in protein ubiquination. Along with MUSE13/14 targets ATG6 ubiquination to regulate autophagosome assembly.	-0.587357
AT2G42350	RING/U-box superfamily protein	0.858587
AT2G44410	RING/U-box superfamily protein	0.608429
AT2G45240	Encodes a cytoplasmic MAP1 like methionine aminopeptidase which is involved in removing the N-terminal methionine from proteins. Induced mutants using RNAi technology which knocks out both MAP1 and MAP2 like genes show abnormal development.	-0.479843
AT2G45950	SKP1-like 20	-0.662962
AT2G46030	Ubiquitin conjugating enzyme E2	1.1215
AT2G46260	Involvement in protein ubiquitylation is predicted based on physical interaction with CULLIN 3 proteins.	0.460124
AT2G47700	RING/U-box superfamily protein	0.596978
AT3G02290	RING/U-box superfamily protein	1.35268
AT3G02340	RING/U-box superfamily protein	0.816717
AT3G02875	Hydrolyzes amino acid conjugates of the plant growth regulator indole-3-acetic acid (IAA), including IAA-Leu and IAA-Phe. Uses Mg and Co ions as cofactors.	0.99319
AT3G05200	Encodes a putative RING-H2 zinc finger protein ATL6 (ATL6). The mRNA is cell-to-cell mobile.	0.905535
AT3G07360	Encodes a protein containing a U-box and an ARM domain. This protein has E3 ubiquitin ligase activity based on in vitro assays.	0.894008
AT3G10815	RING/U-box superfamily protein	2.17722
AT3G11910	ubiquitin-specific protease 13	-0.430119
AT3G12700	Encodes an aspartic protease has an important regulatory function in chloroplasts that not only influences photosynthetic carbon metabolism but also plastid and nuclear gene expression.	0.586
AT3G13430	RING/U-box superfamily protein	1.23973
AT3G13550	Encodes a protein similar to ubiquitin-conjugating enzyme (E2) variant proteins (UEV); lacks catalytic cysteine residue found in ubiquitin-conjugating enzyme E2. Represses photomorphogenesis and induces skotomorphogenesis in the dark.	1.05503
AT3G14400	Encodes a ubiquitin-specific protease.	-1.14523
AT3G17000	Group XIV ubiquitin-conjugating enzyme that functions negative regulation of drought stress.	0.836661
AT3G19850	Phototropic-responsive NPH3 family protein	0.745826
AT3G20015	Eukaryotic aspartyl protease family protein	-1.31718
AT3G22260	Cysteine proteinases superfamily protein	1.11297
AT3G23280	Encodes a ubiquitin ligase that is a novel player in ethylene signaling involved in negatively regulating apical hook curvature, with alternative splicing controlling dual targeting to the nuclear and cytoplasmic compartments.	0.756882
AT3G25700	Eukaryotic aspartyl protease family protein	-0.979781
AT3G27110	PGM48 is a member of a plant specific clade of metallo-endopeptidase proteins. It is found in plastoglobules. Analysis of over-expression and loss of function phenotypes suggests PGM48 may have a role in positively regulating senescence.	0.607786
AT3G27310	encodes a protein that contains a UBX domain and regulates AtCDC48 by inhibiting its ATPase activity and by promoting the disassembly of the active hexamer. Phenotypic analysis of pux1 plants revealed that the loss of PUX1 accelerated the growth of various plant organs including roots and inflorescence shoots. AtCDC48 and SYP31 colocalize at the division plane during cytokinesis and to interact i…	0.579589
AT3G27925	Encodes a DegP protease; nuclear gene encoding chloroplast-targeted protease that can degrade two lumenal proteins, plastocyanin and OE33, suggesting a role as a general-purpose protease in the thylakoid lumen. Involved in the degradation of D1 protein of PS II, hence participating in the repair of PS II damages caused by photoinhibition. The mRNA is cell-to-cell mobile.	0.63772
AT3G29270	RING/U-box superfamily protein	1.15408
AT3G43430	RING/U-box superfamily protein	1.23927
AT3G46620	Encodes an ABA- and drought-induced RING-DUF1117 gene whose mutation results in hyposensitive phenotypes toward ABA in terms of germination rate and stomatal closure and markedly reduced tolerance to drought stress relative to wild-type plants.	0.6143
AT3G47160	RING/U-box superfamily protein	1.00992
AT3G47550	RING/FYVE/PHD zinc finger superfamily protein	0.689966
AT3G48350	Involved in starvation-related responses that curtail primary root growth under severe nutrient limitation.	-0.401364
AT3G49600	Encodes a ubiquitin-specific protease which catalyzes deubiquitination of histone H2B and is required for heterochromatin silencing.Loss of function mutations display autonomous endosperm development and embryo arrest. Loss of function also results in an increase in expression of the PcG complex target gene PHE1.	-0.528802
AT3G53780	RHOMBOID-like protein 4	0.621713
AT3G54400	Eukaryotic aspartyl protease family protein	-1.1338
AT3G54850	Encodes a protein with a typical U-box domain followed by an Armadillo repeat region, a domain organization that is frequently found in plant U-box proteins. Displays ubiquitin ligase activity in vitro.	0.563377
AT3G59080	Eukaryotic aspartyl protease family protein	0.780052
AT3G61060	phloem protein 2-A13	0.846617
AT3G61600	POZ/BTB containing-protein AtPOB1. Involvement in protein ubiquitylation is predicted based on physical interaction with CULLIN 3 proteins. The mRNA is cell-to-cell mobile.	0.359606
AT3G61790	Protein with RING/U-box and TRAF-like domain	0.554452
AT3G62940	Cysteine proteinases superfamily protein	-0.516053
AT4G00335	RING-H2 finger B1A	0.922705
AT4G02440	EID1 is an F-box protein that functions as a negative regulator in phytochrome A (phyA)-specific light signalling. Expressed at all stages of plant development independently of light conditions, localizes to the nucleus, and forms nuclear speckles under continuous far-red light. Forms stable dimeric and trimeric complexes with several ASK proteins and Cullin1 in yeast and in planta.	0.626704
AT4G02890	Polyubiquitin gene containing 4 ubiquitin repeats.	1.41652
AT4G05050	polyubiquitin gene, belongs to a subtype group with UBQ10 and UBQ14. Various ecotypes of Arabidopsis have different numbers of ubiquitin repeats within this gene.	1.15205
AT4G05320	One of five polyubiquitin genes in A. thaliana. These genes encode the highly conserved 76-amino acid protein ubiquitin that is covalently attached to substrate proteins targeting most for degradation. Polyubiquitin genes are characterized by the presence of tandem repeats of the 228 bp that encode a ubiquitin monomer. Induced by salicylic acid. Independent of NPR1 for their induction by salicyli…	1.22898
AT4G05420	Structurally similar to damaged DNA binding proteins. DDB1a is part of a 350 KDa nuclear localized DET1 protein complex. This complex may physically interact with histone tails and while bound to chromatin- repress transcription of genes involved in photomorphogenesis. DDB1a is shown to be RUB-modified.	-0.380475
AT4G11360	Encodes a putative RING-H2 finger protein RHA1b. The mRNA is cell-to-cell mobile.	1.56176
AT4G12570	Knock-out mutants showed accelerated senescence of leaves. The mRNA is cell-to-cell mobile.	0.46805
AT4G14365	hypothetical protein	2.40792
AT4G14800	Encodes 20S proteasome beta subunit PBD2 (PBD2).	0.44332
AT4G16190	Papain family cysteine protease	0.920335
AT4G17040	HON5 (At4g17040) encodes the ClpR4 subunit of the chloroplast-localized Clp protease complex. hon mutations disturb plastid protein homeostasis, thereby activating plastid signaling and inducing stress acclimatization.	0.436358
AT4G18370	Encodes DEG5. Forms a hexamer with DEG8 in the thylakoid lumen. Involved in the cleavage of photodamaged D2 protein of photosystem II (PSII).	0.789408
AT4G21100	One of two closely related genes similar to a damaged DNA binding protein originally described in mammals. May form a complex with DET1 to regulate photomorphogenesis. Loss of function mutations are lethal. The DDB1b protein binds with a number of DWD-containing proteins and may form part of a CUL4-based E3 ubiquitin ligase.	-0.818852
AT4G21810	DERLIN-2.1	0.48324
AT4G22970	Encodes a separase (ESP), homologous to human and mouse separase protein. Separase is a capase family protease required for the release of sister chromatid cohesion during meiosis and mitosis. Arabidopsis separase contains a predicted 2Fe2S-ferredoxin domain that is not present in the proteins of other organisms. Also contains a putative EF-hand calcium binding domain. Mutant seeds exhibited embr…	-1.10122
AT4G24990	geranylgeranylated protein ATGP4	0.910002
AT4G25660	PPPDE putative thiol peptidase family protein	0.754683
AT4G26400	RING/U-box superfamily protein	0.586864
AT4G27960	ubiquitin conjugating enzyme	0.415672
AT4G28270	Encodes a RING finger E3 ubiquitin ligase. Binds and ubiquitinates ABP1 in vivo and in vitro.	0.88129
AT4G30020	PA-domain containing subtilase family protein	-0.497223
AT4G30530	Encodes a gamma-glutamyl peptidase, outside the GGT family, that can hydrolyze gamma-glutamyl peptide bonds. The mRNA is cell-to-cell mobile.	0.664274
AT4G30890	Encodes a ubiquitin-specific protease.	-0.726223
AT4G31450	RING/U-box superfamily protein	0.511421
AT4G33565	RING/U-box superfamily protein	1.04562
AT4G34980	Serine protease similar to subtilisin.	-0.557138
AT4G36195	Serine carboxypeptidase S28 family protein	0.458167
AT4G36800	RUB1 conjugating enzyme that conjugates CUL1 and is involved in auxin response and embryogenesis. RCE1 protein physically interacts with RBX1, which may be the E3 for CUL1.	0.425542
AT4G37610	BTB and TAZ domain protein. Located in cytoplasm and expressed in fruit, flower and leaves.	0.750324
AT4G39090	Similar to cysteine proteinases, induced by desiccation but not abscisic acid. Required for RRS1-R mediated resistance against Ralstonia solanacearum. Interacts with the R. solanacearum type III effector PopP2. RD19 associates with PopP2 to form a nuclear complex that is required for activation of the RRS1-R?mediated resistance response.	0.57613
AT4G39640	The gene encodes a gamma-glutamyltransferase (AKA gamma-glutamyl transpeptidase, EC 2.3.2.2) that is located in vascular tissues (predominantly phloem) of leaves and is involved in the degradation of glutathione. The encoded enzyme also mitigates oxidative stress by metabolizing GSSG (oxidized form of GSH - glutathione) in the apoplast.	0.896014
AT5G01520	Encodes a cytosolic RING-type E3 ubiquitin (Ub) ligase that is critical for ABA and high salinity responses during germination. AtAIRP2 and SDIR1 likely play a combinatory role in ABA signaling and the response to high salt in Arabidopsis.	1.25037
AT5G02880	encodes a ubiquitin-protein ligase containing a HECT domain. There are six other HECT-domain UPLs in Arabidopsis. The mRNA is cell-to-cell mobile.	0.569595
AT5G03240	encodes ubiquitin that is attached to proteins destined for degradation. UBQ3 is most homologous with UBQ4, and is expressed in higher levels in vegetative tissue but lower levels in flowers than UBQ4. UBQ3 encodes different number of ubiquitins in different ecotypes. UBQ3 transcript level is modulated by UV-B and light/dark treatments.	0.968564
AT5G05700	Encodes an arginyl-tRNA:protein transferase (ATE1), a component of the N-end rule pathway that targets protein degradation through the identity of the amino-terminal residue of specific protein substrates. Arabidopsis contains two ATE genes: At5g05700/ATE1, At3g11240/ATE2. Another component of the N-end rule pathway is At5g02310/PROTEOLYSIS6 (PRT6). PRT6 and ATE were shown to regulate seed after-…	0.529356
AT5G05780	Encodes a putative 26S proteasome subunit RPN8a. The function of RPN8a and other 26S subunits may be required for specifying leaf adaxial identity. The mRNA is cell-to-cell mobile.	-0.435316
AT5G06460	Encodes a ubiquitin-activating enzyme (E1), involved in the first step in conjugating multiple ubiquitins to proteins targeted for degradation. Gene is expressed in most tissues examined. The mRNA is cell-to-cell mobile.	-0.795015
AT5G06600	Encodes a ubiquitin-specific protease.	-0.568146
AT5G07030	Eukaryotic aspartyl protease family protein	-1.38828
AT5G07250	RHOMBOID-like protein 3	0.770867
AT5G10650	JUL1 encode a RING-type E3 ubiquitin ligase that is involved in JA responses. It ubiquitinates the JAV1 jasmonic acid response repressor which is then degraded by the proteosome.	0.766516
AT5G10770	Eukaryotic aspartyl protease family protein	0.517194
AT5G14250	Encodes subunit 3 of the COP9 signalosome.	-0.582064
AT5G19180	Encodes a subunit of a RUB-activating enzyme analogous to the E1 ubiquitin-activating enzyme. ECR1 functions as a heterodimer with AXR1 to activate RUB, a ubiquitin-related protein.	-0.94942
AT5G20620	encodes a ubiquitin polyprotein.	1.13204
AT5G20910	Encodes an E3 ligase that can interact with and polyubiquitinate ABI3 in vitro. AIP2 likely negatively regulates ABA signaling by targeting ABI3 for post-translational destruction.	0.905664
AT5G22850	Eukaryotic aspartyl protease family protein	0.585904
AT5G27420	Encodes CNI1 (Carbon/Nitrogen Insensitive1) (also named as ATL31), a RING type ubiquitin ligase that functions in the Carbon/Nitrogen response for growth phase transition in Arabidopsis seedlings. The mRNA is cell-to-cell mobile.	1.78439
AT5G36950	Encodes a putative DegP protease.	-0.742195
AT5G38895	RING/U-box superfamily protein	1.24997
AT5G40770	prohibitin 3	-0.715
AT5G41340	Belongs to Ubiquitin conjugating enzyme family. Gene expression is developmentally regulated.	0.943232
AT5G41350	RING/U-box superfamily protein	0.983181
AT5G41700	One of the polypeptides that constitute the ubiquitin-conjugating enzyme E2 The mRNA is cell-to-cell mobile.	0.613814
AT5G42190	Similar to SKP1 in yeast and humans which are involved in mitotic cell cycle control and ubiquitin mediated proteolysis.	0.587743
AT5G42300	ubiquitin-like protein 5	0.733049
AT5G42620	metalloendopeptidase / zinc ion binding protein	-0.383318
AT5G42970	encodes subunit 4 of COP9 signalosome complex. sequence is similar to a subunit of the 19S regulatory particle of the 26S proteasome. recessive mutation causes derepression of photomorphogenesis.	-0.753766
AT5G49980	auxin F-box protein 5	-0.31666
AT5G50430	ubiquitin-conjugating enzyme 33	0.731206
AT5G51540	Mitochondrial ATP-independent protease	-1.09179
AT5G51740	Mitochondrial ATP-independent protease .Important for maintenance of proper function of the oxphos system.	0.813555
AT5G52880	F-box family protein	1.07406
AT5G53300	Encodes a ubiquitin conjugating enzyme.	0.428375
AT5G53350	CLP protease regulatory subunit CLPX mRNA, nuclear gene	0.526357
AT5G55160	Encodes a small ubiquitin-like modifier (SUMO) polypeptide that becomes covalently attached to various intracellular protein targets, much like ubiquitination, leading to post-translational modification of those targets. SUMO2 can form SUMO chains through lysine residue 10 during in vitro assays.	0.642026
AT5G55970	RING/U-box superfamily protein	0.728869
AT5G56340	RING/U-box superfamily protein	0.703741
AT5G56730	Insulinase (Peptidase family M16) protein	-0.611551
AT5G57900	F-box protein, interacts with SKP1/ASK1 subunit of SCF ubiquitin ligase in a glucose-dependent manner	0.611344
AT5G57990	Encodes a ubiquitin-specific protease.	-1.13668
AT5G58870	encodes an FtsH protease that is localized to the chloroplast	0.754626
AT5G59550	Encodes an ABA- and drought-induced RING-DUF1117 gene whose mutation results in hyposensitive phenotypes toward ABA in terms of germination rate and stomatal closure and markedly reduced tolerance to drought stress relative to wild-type plants.	0.793887
AT5G60360	Encodes a senescence-associated thiol protease. The mRNA is cell-to-cell mobile.	0.749054
AT5G60710	Zinc finger (C3HC4-type RING finger) family protein	-0.469905
AT5G62540	Encodes a protein predicted to be an E2 ubiquitin conjugating enzyme. It appears homologous to the RAD6 protein in yeast implicated in histone ubiquitination, but, UBC3 has not been experimentally associated with this process.	0.527944
AT5G64660	CYS, MET, PRO, and GLY protein 2	0.991922
AT5G67140	F-box/RNI-like superfamily protein	1.85023
AT5G67250	Encodes an SKP1 interacting partner (SKIP2).Encodes an F-box protein. Based on genetic analysis appears to be functionally redundant with VFB1,2, and 3. When expression of all 4 genes is reduced plants show defects in growth and reduced expression of auxin response genes.	0.492944
AT5G67340	ARM repeat superfamily protein	1.68728
ATCG00670	Encodes the only ClpP (caseinolytic protease) encoded within the plastid genome. Contains a highly conserved catalytic triad of Ser-type proteases (Ser-His-Asp). Part of the 350 kDa chloroplast Clp complex. The name reflects nomenclature described in Adam et. al (2001).	0.453487

## Sheet: Transcriptional activation
Locus identifier	Gene Model Description	log2(larp1+T2/larp1) mRNA levels
AT1G08010	Encodes a member of the GATA factor family of zinc finger transcription factors.	-0.588054
AT1G10200	Encodes a member of the Arabidopsis LIM proteins: a family of actin bundlers with distinct expression patterns. WLIM1, WLIM2a, and WLIM2b are widely expressed, whereas PLIM2a, PLIM2b, and PLIM2c are predominantly expressed in pollen. Regulates actin cytoskeleton organization.	-0.770758
AT1G13260	Encodes an AP2/B3 domain transcription factor which is upregulated in response to low temperature. It contains a B3 DNA binding domain. It has circadian regulation and may function as a negative growth regulator. The mRNA is cell-to-cell mobile.	0.371136
AT1G18570	Encodes a member of the R2R3-MYB transcription family. Involved in indole glucosinolate biosynthesis. The mRNA is cell-to-cell mobile.	1.90135
AT1G19000	Homeodomain-like superfamily protein	0.297942
AT1G19700	Encodes a member of the BEL family of homeodomain proteins. Its interaction with PLP (PAS/LOV PROTEIN) is diminished by blue light.	0.508288
AT1G20910	ARID/BRIGHT DNA-binding domain-containing protein	-1.20236
AT1G21000	PLATZ transcription factor family protein	1.0144
AT1G22070	Encodes a transcription factor. Like other TGAla-related factors, TGA3 has a highly conserved bZIP region and exhibits similar DNA-binding properties.	0.65522
AT1G22985	encodes a member of the ERF (ethylene response factor) subfamily B-5 of ERF/AP2 transcription factor family. The protein contains one AP2 domain. There are 7 members in this subfamily.	1.52293
AT1G23380	homeodomain transcription factor KNAT6, belonging to class I of KN transcription factor family (which also includes KNAT1 and KNAT2). Expression is increased in as and bop1 leaf mutants.	0.703161
AT1G25440	B-box type zinc finger protein with CCT domain-containing protein	0.489603
AT1G27730	Related to Cys2/His2-type zinc-finger proteins found in higher plants. Compensated for a subset of calcineurin deficiency in yeast. Salt tolerance produced by ZAT10 appeared to be partially dependent on ENA1/PMR2, a P-type ATPase required for Li+ and Na+ efflux in yeast. The protein is localized to the nucleus, acts as a transcriptional repressor and is responsive to chitin oligomers. Also involv…	0.82009
AT1G28420	homeobox-1	-0.537272
AT1G30500	nuclear factor Y, subunit A7	1.35372
AT1G32330	Member of Heat Stress Transcription Factor (Hsf) family. Negatively regulated by HSP90.2.	-0.781103
AT1G32700	PLATZ transcription factor family protein	1.11053
AT1G34180	NAC domain containing protein 16	1.46851
AT1G34190	Encodes a NAC domain transcription factor that regulates the mitochondrial retrograde response and coordinates organellar functions and stress responses.	0.404091
AT1G34370	Encodes a putative nuclear Cys(2)His(2)-type zinc finger protein involved in H+ and Al3+ rhizotoxicity. In mutants exposed to aluminum stress, there is no induction of AtALMT1, an malate transporter known to be involved in the mediation of aluminum toxicity. Cell wall of the mutant is unstable in low pH medium (pH 4.5) in low Ca solution. This would mediate Ca-alleviation of low pH stress through…	0.428439
AT1G43700	Encodes a VirE2-interacting protein. VIP1 mediates nuclear translocation of VirE2 via its amino half, and interacts with histone H2A via it carboxyl half. Involved in osmosensory response. The mRNA is cell-to-cell mobile.	0.697948
AT1G47270	Member of TLP family of tubby like proteins that also contain an F-Box. Localized to the plasma membrane.	0.830708
AT1G48500	jasmonate-zim-domain protein 4	0.877387
AT1G49480	Encodes a nuclear-localized DNA-binding protein that interacts with ITN1 at the PM and nuclei in vivo and may regulate ITN's subcellular localization.	0.526429
AT1G49720	Identified as a protein that binds to abscisic acid response elements. May mediate transcriptional regulation of ABA responses.	1.13541
AT1G50600	Encodes a scarecrow-like protein (SCL5). Member of GRAS gene family.	0.340304
AT1G51700	Encodes dof zinc finger protein (adof1). The mRNA is cell-to-cell mobile.	0.539351
AT1G52880	Transcription factor with a NAC domain. Homologous to the petunia gene NAM which is required for the development of the shoot. Expressed in the embryo.	1.24493
AT1G54060	Member of the trihelix DNA binding protein family. Nuclear localized. Involved in repressing seed maturation genes during seed germination and seedling development.	0.509034
AT1G61730	DNA-binding storekeeper protein-related transcriptional regulator	-0.717014
AT1G62300	Encodes a transcription factor WRKY6. Regulates Phosphate1 (Pho1) expression in response to low phosphate (Pi) stress.	0.757402
AT1G63650	Mutant has reduced trichomes, anthocyanin, and seed coat mucilage and abnormally patterned stomates. Mutants are defective in jasmonate-induced anthocyanin accumulation. Encodes a bHLH Transcription Factor 1. The protein is functionally redundant with GL3 and TT8 and interacts with TTG1, the myb proteins GL1, PAP1 and 2, CPC and TRY, and it will form heterodimers with GL3. Expression in N (non-ha…	-0.862472
AT1G66810	Encodes a tandem CCCH zinc finger (TZF) protein that can bind DNA and RNA, function as a transcriptional activator, and is involved in secondary wall biosynthesis.	2.09923
AT1G67310	Calmodulin-binding transcription activator protein with CG-1 and Ankyrin domain	0.829171
AT1G68190	B-box zinc finger family protein	0.885955
AT1G68550	encodes a member of the ERF (ethylene response factor) subfamily B-6 of ERF/AP2 transcription factor family. The protein contains one AP2 domain. There are 12 members in this subfamily including RAP2.11.	-1.02175
AT1G68840	Rav2 is part of a complex that has been named `regulator of the (H+)-ATPase of the vacuolar and endosomal membranes' (RAVE) The mRNA is cell-to-cell mobile.	0.774341
AT1G71130	encodes a member of the ERF (ethylene response factor) subfamily B-5 of ERF/AP2 transcription factor family. The protein contains one AP2 domain. There are 7 members in this subfamily.	1.03616
AT1G72050	Encodes a transcriptional factor TFIIIA required for transcription of 5S rRNA gene. 5S rRNA is the smallest constituent of the ribosome. Work on one of the gene models AT1G72050.2 showed that it encodes a protein with nine Cys(2)-His(2)-type zinc fingers, a characteristic feature of TFIIIA proteins. AT1G72050.2 also contains a 23 amino acid spacer between fingers 1 and 2, a 66 amino acid spacer b…	-0.722012
AT1G72450	JAZ6 transcript levels rise in response to a jasmonate stimulus and a GFP:JAZ6 fusion protein localizes to the nucleus. Application of jasmonate methyl ester to Arabidopsis roots reduces the levels of a JAZ6:GUS fusion protein, presumably by stimulating ubiquitin-proteasome-mediated degradation.	0.733644
AT1G73870	B-box type zinc finger protein with CCT domain-containing protein	0.930903
AT1G74840	Homeodomain-like superfamily protein	0.613056
AT1G75390	basic leucine-zipper 44	0.879001
AT1G75410	BEL1-like homeodomain 3 (BLH3)	0.589402
AT1G76890	encodes a plant trihelix DNA-binding protein	0.588392
AT1G77920	bZIP transcription factor family protein	0.811256
AT1G79000	Homologous to CREB-binding protein, a co-activator of transcription with histone acetyl-transferase activity. No single prior lysine acetylation is sufficient to block HAC1 acetylation of the H3 or H4 peptides, suggesting that HAC1, HAC5, and HAC12 can acetylate any of several lysines present in the peptides. HAM2 acetylates histone H4 lysine 5. A plant line expressing an RNAi construct targeted …	-0.532084
AT2G01430	ATHB17 is a member of the HD-Zip transcription factor family. It is expressed most strongly in roots at different stages of development and induced by ABA, paraquat, drought, and NaCl treatments. Loss of function mutants are more sensitive to salt and drought stress.The protein is nuclear localized and has been shown to bind to the promoter of SIG5 and other genes.	1.40377
AT2G01570	Member of the VHIID/DELLA regulatory family. Contains homopolymeric serine and threonine residues, a putative nuclear localization signal, leucine heptad repeats, and an LXXLL motif. Putative transcriptional regulator repressing the gibberellin response and integration of phytohormone signalling. DELLAs repress cell proliferation and expansion that drives plant growth. The protein undergoes degra…	-0.340731
AT2G16400	BEL1-like homeodomain 7	-0.747504
AT2G18160	Encodes a b-ZIP transcription factor.	0.575151
AT2G18350	homeobox protein 24	0.966326
AT2G18500	ovate family protein 7	1.321
AT2G19810	Encodes Oxidation-related Zinc Finger 1 (OZF1), a plasma membrane protein involved in oxidative stress.	1.6212
AT2G20280	Zinc finger C-x8-C-x5-C-x3-H type family protein	-0.654956
AT2G21900	member of WRKY Transcription Factor; Group II-c	1.76928
AT2G22300	Encodes a putative CAM binding transcription factor. Loss of function mutations show enhanced resistance to fungal and bacterial pathogens suggesting that CAMTA functions to suppress defense responses.It acts in the cold response pathway, it can bind to and activate the expression of DREB1 genes.	1.01258
AT2G22430	Encodes a homeodomain leucine zipper class I (HD-Zip I) protein that is a target of the protein phosphatase ABI1 and regulates hormone responses in Arabidopsis.	0.65516
AT2G22540	Encodes a nuclear protein that acts as a floral repressor and that functions within the thermosensory pathway. SVP represses FT expression via direct binding to the vCArG III motif in the FT promoter.	0.883656
AT2G22770	Regulates the development of ER bodies. also involves in response to the endophytic fungus Piriformospora indica.	-0.480541
AT2G23320	Encodes WRKY DNA-binding protein 15 (WRKY15).	0.856301
AT2G25620	Encodes DBP1, a member of the DBP factors (DNA-binding protein phosphatases) featuring sequence-specific DNA-binding and protein phosphatase activity. DBP1 is involved in plant-potyvirus interactions. Loss-of-function of DBP1 renders resistance to potyviruses.	-1.36674
AT2G25900	Encodes a protein with two tandem-arrayed CCCH-type zinc fingers that binds RNA and is involved in RNA turnover. The mRNA is cell-to-cell mobile.	1.26498
AT2G26580	plant-specific transcription factor YABBY family protein	0.608373
AT2G27100	Identified as a leaf form mutant by Redei having serrated leaves. Further analysis of the single loss of function allele indicated pleiotropic effects extending to many aspects of shoot development such as taller meristems, alterations in phase transition, phyllotaxy and branching. Encodes a single zinc finger containing protein that is expressed in meristems and organ primordia and forms a compl…	-1.02686
AT2G28450	zinc finger (CCCH-type) family protein	-0.83863
AT2G30250	member of WRKY Transcription Factor; Group I. Located in nucleus. Involved in response to various abiotic stresses - especially salt stress.	1.20163
AT2G30470	HSI2 is a member of the ABI3 family of B3 domain proteins and functions as an active repressor of the Spo minimal promoter through the EAR motif. It contains a plant-specific B3 DNA-binding domain. It is expressed at similar levels in all organs. Treatment with 6% sucrose showed a slight increase in transcript levels after 24 h. No changes were observed after treatment with 50?M ABA. It is locali…	-0.826425
AT2G31730	basic helix-loop-helix (bHLH) DNA-binding superfamily protein	0.790704
AT2G32100	ovate family protein 16	1.55218
AT2G33480	NAC domain containing protein 41	0.908219
AT2G34720	nuclear factor Y, subunit A4	0.712544
AT2G36080	Encodes a plant-specific B3 DNA-binding domain transcription factor. Has transcription repressor activity.	-0.829216
AT2G36400	Growth regulating factor encoding transcription activator. One of the nine members of a GRF gene family, containing nuclear targeting domain. Mutants result in smaller leaves indicating the role of the gene in leaf development. Expressed in root, shoot and flower.	-0.744707
AT2G36720	Acyl-CoA N-acyltransferase with RING/FYVE/PHD-type zinc finger domain-containing protein	-0.498084
AT2G36960	Arabidopsis thaliana myb/SANT domain protein	0.60404
AT2G37430	Encodes a member of the zinc finger family of transcriptional regulators. It is expressed in many root tips, primary roots, cotyledons and hypocotyl. The protein is localized to the nucleus. Overexpression of ZAT11 causes increased root growth and increased sensitivity to nickel ions. The mRNA is cell-to-cell mobile.	2.12121
AT2G38470	Member of the plant WRKY transcription factor family. Regulates the antagonistic relationship between defense pathways mediating responses to P. syringae and necrotrophic fungal pathogens. Located in nucleus. Involved in response to various abiotic stresses - especially salt stress.	1.56489
AT2G39900	Encodes a member of the Arabidopsis LIM proteins: a family of actin bundlers with distinct expression patterns. WLIM1, WLIM2a, and WLIM2b are widely expressed, whereas PLIM2a, PLIM2b, and PLIM2c are predominantly expressed in pollen. Regulates actin cytoskeleton organization.	-0.650128
AT2G40140	zinc finger (CCCH-type) family protein	0.759123
AT2G40950	bZIP17 appears to regulate transcription as part of a salt and osmotic stress response. zip17 mutants show enhanced inhibition of primary root elongation in response to NaCl. Several salt-responsive genes, such as ATHB-7 show a reduced transcriptional response to a salt treatment in zip17 mutant seedlings. myc:bZIP17 undergoes proteolytic processing in salt-treated wild type seedlings, but not in…	-0.725453
AT2G41900	CCCH-type zinc finger protein with ARM repeat domain-containing protein	-0.686438
AT2G43000	Encodes a NAC transcription factor induced by hydrogen peroxide (H2O2). Involved in senescence. Over expression of the gene strongly delays senescence and enhances tolerance to various abiotic stresses.	3.04901
AT2G43060	ILI1 binding bHLH 1	2.01384
AT2G45190	Encodes a member of the YABBY family of transcriptional regulators that is involved in abaxial cell type specification in leaves and fruits. YAB1 acts in a non-cell autonomous fashion within the meristem to affect phyllotactic patterning. The non-autonomous effect on the central region of the meristem is mediated through the activity if Lateral Suppressor (LAS).	0.74893
AT2G46040	Encodes a transcriptional activator that is involved in pollen development. ARID1 is expressed in nuclear bodies of microspore, vegetative and generative cells, and binds to and activates DUO during microgametogenesis.	-0.681938
AT2G46270	encodes a bZIP G-box binding protein whose expression is induced by ABA. It has been shown to bind to Adh that contains the G-box and is induced by cold and water deprivation. GBF3 has been shown to be expressed mostly in the root and dark-grown leaves. GBF3 can act as homodimers and as heterodimers with GFB1, GBF2 and GBF4. In addition, GBF3!?s DNA binding activity is enhanced by GIP1, GPRI1 and…	0.556609
AT2G47900	Member of plant TLP family which differs in having an F box domain. Plasma membrane tethering is mediated by PIP2 binding domain. Under abiotic stress TLP3 detaches from the PM and translocates to the nucleus. Mutants are insensitive to ABA.	0.457273
AT2G48160	HUA and HUA-LIKE (HULK) genes act redundantly to regulate a subset of essential genes, with some (or all) family members also having specific functions.	-0.367677
AT3G01470	Encodes a homeodomain leucine zipper class I (HD-Zip I) transcriptional activator involved in leaf and hypocotyl development. Its promoter is bound by PIF1 which likely regulates its expression. Its translation is regulated by a conserved upstream ORF (CPuORF33).	0.709306
AT3G01970	member of WRKY Transcription Factor; Group I	1.60603
AT3G02830	Encodes a zinc finger protein that binds to PORA mRNA in vivo and recruits the Pfr form of phytochrome to the 5&#8242;-UTR of PORA mRNA to regulate translation of the mRNA.	0.525088
AT3G02940	Encodes a putative transcription factor (MYB107).	2.11976
AT3G04060	NAC046 is a member of the NAC domain containing family of transcription factors. It was identified in a screen for regulators of chlorophyll protein gene expression. Mutants in NAC046 have delayed senescence and increased CHL content suggesting a role in regulation of senescence and chlorophyll degradation.	0.699045
AT3G06250	FAR1-related sequence 7	-0.558833
AT3G10500	Encodes a transcriptional activator that is associated with the plasma membrane in a dormant form and is proteolytically cleaved to create a form that can enter the nucleus. It is thought to promote ROS production by binding directly to the promoters of genes encoding ROS biosynthetic enzymes during drought-induced leaf senescence. The mRNA is cell-to-cell mobile.	0.795871
AT3G11280	Putative transcription factors interacting with the gene product of VHA-B1 (vacuolar ATPase subunit B1; as shown through yeast two-hybrid assay).	0.512362
AT3G12560	Encodes a telomeric DNA-binding protein.	0.963599
AT3G13040	myb-like HTH transcriptional regulator family protein	0.732012
AT3G14230	encodes a member of the ERF (ethylene response factor) subfamily B-2 of ERF/AP2 transcription factor family (RAP2.2). The protein contains one AP2 domain. There are 5 members in this subfamily including RAP2.2 AND RAP2.12.	-0.306994
AT3G16940	calmodulin-binding transcription activator	0.782793
AT3G17100	sequence-specific DNA binding transcription factor	0.621117
AT3G17250	Protein phosphatase 2C family protein	1.29238
AT3G18640	Zinc finger C-x8-C-x5-C-x3-H type family protein	-0.533519
AT3G19360	Zinc finger (CCCH-type) family protein	-1.1197
AT3G19510	Encodes a member of the PHD-finger homeodomain protein family. The HAT3.1 homeodomain is highly divergent in sequence even at positions that are almost invariable among homeodomains. HAT3.1 shows a preference for the sequence T(A/G)(A/C)ACCA, different from those bound by other homeodomains.	-0.72267
AT3G21330	basic helix-loop-helix (bHLH) DNA-binding superfamily protein	0.961257
AT3G23250	Member of the R2R3 factor gene family.	2.85151
AT3G24120	MYB-CC protein involved in regulation of response to phosphate starvation.	0.588387
AT3G25890	encodes a member of the ERF (ethylene response factor) subfamily B-6 of ERF/AP2 transcription factor family. The protein contains one AP2 domain. There are 12 members in this subfamily including RAP2.11. The mRNA is cell-to-cell mobile.	-1.35056
AT3G42790	Encodes a member of the Alfin1-like family of nuclear-localized PHD (plant homeodomain) domain containing proteins. All AL proteins except AL3 bind to di- or trimethylated histone H3 (H3K4me3/2). Members of this family include: AT5G05610 (AL1), AT3G11200 (AL2), AT3G42790 (AL3), AT5G26210 (AL4), AT5G20510 (AL5), AT2G02470 (AL6), AT1G14510 (AL7).	0.410608
AT3G46080	C2H2-type zinc finger family protein	3.27598
AT3G46590	Encodes a protein that specifically binds plant telomeric DNA (TTTAGGG)n repeats. Involved in bending DNA. Expressed throughout the plant with highest levels in flowers.	0.876028
AT3G47620	Encodes a transcription factor AtTCP14 that regulates seed germination. AtTCP14 shows elevated expression level just prior to germination. AtTCP14 is predominantly expressed in the vascular tissue of the embryo, and affects gene expression in radicles in a non-cell-autonomous manner.	-0.571618
AT3G49800	BSD domain-containing protein	0.788482
AT3G49940	LOB domain-containing protein 38	-0.457747
AT3G50260	Encodes a member of the DREB subfamily A-5 of ERF/AP2 transcription factor family. The protein contains one AP2 domain. Involved in defense and freezing stress responses. There are 16 members in this subfamily including RAP2.1, RAP2.9 and RAP2.10. The mRNA is cell-to-cell mobile.	1.653
AT3G50750	BES1/BZR1 homolog 1	0.678976
AT3G53680	Acyl-CoA N-acyltransferase with RING/FYVE/PHD-type zinc finger domain-containing protein	-1.09676
AT3G56400	Member of WRKY Transcription Factor; Group III. Function as activator of SA-dependent defense genes and a repressor of JA-regulated genes. WRKY70-controlled suppression of JA-signaling is partly executed by NPR1.	1.41547
AT3G57800	basic helix-loop-helix (bHLH) DNA-binding superfamily protein	0.656614
AT3G60030	squamosa promoter-binding protein-like 12	0.294901
AT3G61890	Encodes a homeodomain leucine zipper class I (HD-Zip I) protein. Loss of function mutant has abnormally shaped leaves and stems.	0.737586
AT3G62240	RING/U-box superfamily protein	-0.442589
AT4G00480	MYC-related protein with a basic helix-loop-helix motif at the C-terminus and a region similar to the maize B/R family at the N-terminus	-0.725701
AT4G01120	bZIP (basic leucine zipper) transcription factor that binds to the G-box regulatory element found in many plant promoters. GBF2 nuclear localization is increased by blue light	0.561882
AT4G01250	AtWRKY22 is a member of WRKY Transcription Factor; Group II-e. It is involved in regulation of dark induced leaf senescence.	0.827732
AT4G01680	Encodes a putative transcription factor (MYB55).	0.813497
AT4G02560	Encodes a nuclear localized protein with similarity to transcriptional regulators. Recessive mutants are late flowering. Expression of LFY is reduced in LD mutants. LD has been reported to exhibit prion like behavior in yeast but it remains to be determined if such activity exists during normal plant development.	-0.408278
AT4G02640	Encodes a basic leucine zipper (bZIP) transcription factor AtbZIP10. AtbZIP10 shuttles between the nucleus and the cytoplasm. It binds consensus G- and C-box DNA sequences. AtbZIP10 acts antagonistically with LSD1 in both pathogen-induced hypersensitive response and basal defense responses.	0.688086
AT4G03090	sequence-specific DNA binding transcription factor ATNDX	-0.539424
AT4G04890	Encodes a homeodomain protein that is expressed in the LI layer of the vegetative, floral and inflorescence meristems. Binds to the L1 box promoter element which is required in some proteins for L1 specific expression.	-1.16711
AT4G14540	nuclear factor Y, subunit B3	0.703828
AT4G14920	Acyl-CoA N-acyltransferase with RING/FYVE/PHD-type zinc finger protein	-0.404042
AT4G16141	GATA type zinc finger transcription factor family protein	-0.984549
AT4G17230	Encodes a scarecrow-like protein (SCL13). Member of GRAS gene family.	0.54876
AT4G17490	Encodes a member of the ERF (ethylene response factor) subfamily B-3 of ERF/AP2 transcription factor family (ATERF-6). The protein contains one AP2 domain. There are 18 members in this subfamily including ATERF-1, ATERF-2, AND ATERF-5. It is involved in the response to reactive oxygen species and light stress.	1.3899
AT4G17900	PLATZ transcription factor family protein	0.987631
AT4G18170	Member of WRKY Transcription Factor; Group II-c. Involved in the activation of salicylic acid biosynthesis genes ICS1 and PBS3. In the ovule, it is expressed in hypodermal somatic cells and appears to play a role in supression of megasporocyte cell fate.	2.58586
AT4G23750	encodes a member of the ERF (ethylene response factor) subfamily B-5 of ERF/AP2 transcription factor family. The protein contains one AP2 domain. There are 7 members in this subfamily. Monopteros target gene. CRF proteins relocalize to the nucleus in response to cytokinin.	-0.693286
AT4G23810	member of WRKY Transcription Factor; Group III	1.59394
AT4G29190	Zinc finger C-x8-C-x5-C-x3-H type family protein	1.03686
AT4G31550	member of WRKY Transcription Factor; Group II-d; negative regulator of basal resistance to Pseudomonas syringae.	0.543484
AT4G32010	HSI2-like 1	-0.610513
AT4G32040	A member of Class II KN1-like homeodomain transcription factors factors (together with KNAT3 and KNAT4), with greatest homology to the maize knox1 homeobox protein. Regulates photomorphogenic responses and represses late steps in gibberellin biosynthesis. KNAT5 promoter activity showed cell-type specific pattern along longitudinal root axis, primarily in the epidermis of the distal end of primary…	0.462934
AT4G32730	Encodes a putative c-myb-like transcription factor with three MYB repeats.	-0.604683
AT4G36780	BES1/BZR1 homolog 2	0.893116
AT4G36990	Encodes a protein whose sequence is similar to heat shock factors that regulate the expression of heat shock proteins. Transcript level is increased in response to heat shock. However, overexpression of this gene did not result in the increase of decrease of heat shock proteins.	0.885941
AT4G37260	Member of the R2R3 factor gene family. The mRNA is cell-to-cell mobile.	0.733983
AT4G37540	LOB domain-containing protein 39	-1.02825
AT4G39160	Homeodomain-like superfamily protein	-0.727831
AT4G39780	encodes a member of the DREB subfamily A-6 of ERF/AP2 transcription factor family. The protein contains one AP2 domain. There are 8 members in this subfamily including RAP2.4.	1.17927
AT5G05790	Duplicated homeodomain-like superfamily protein	0.63692
AT5G06550	Encodes a HR demethylase that acts as a positive regulator of seed germination in the PHYB-PIL5-SOM pathway.	-1.37022
AT5G07580	encodes a member of the ERF (ethylene response factor) subfamily B-3 of ERF/AP2 transcription factor family. The protein contains one AP2 domain. There are 18 members in this subfamily including ATERF-1, ATERF-2, AND ATERF-5.	0.558156
AT5G08790	induced by wounding, belongs to a large family of putative transcriptional activators with NAC domain.	1.24316
AT5G11060	A member of Class II KN1-like homeodomain transcription factors (together with KNAT3 and KNAT5), with greatest homology to the maize knox1 homeobox protein. Expression regulated by light. Detected in all tissues examined, but most prominent in leaves and young siliques. Transient expression of GFP translational fusion protein suggests bipartite localization in nucleus and cytoplasm. KNAT4 promote…	0.705183
AT5G11270	Encodes a homeodomain transcription factor involved in mediating resistance to infection by necrotrophic pathogens dependent on perception of jasmonic acid through COI1. Expressed in the nucleus. Downregulated upon fungal infection. Also involved in drought tolerance.	-0.706635
AT5G11590	encodes a member of the DREB subfamily A-4 of ERF/AP2 transcription factor family. The protein contains one AP2 domain. There are 17 members in this subfamily including TINY.	-1.03443
AT5G14340	Member of the R2R3 factor gene family.	-1.76097
AT5G16540	Encodes a zinc finger protein.	0.609117
AT5G17810	Encodes a WUSCHEL-related homeobox gene family member with 65 amino acids in its homeodomain. Proteins in this family contain a sequence of eight residues (TLPLFPMH) downstream of the homeodomain called the WUS box. Together with WOX11, WOX12 is involved in de novo root organogenesis.	1.22292
AT5G18270	NAC domain containing protein 87	0.781006
AT5G18960	FAR1-related sequence 12	-0.624299
AT5G24110	member of WRKY Transcription Factor; Group III	2.4906
AT5G24800	Encodes bZIP protein BZO2H2.	0.661977
AT5G25220	A member of class II knotted1-like homeobox gene family (together with KNAT4 and KNAT5). Expressed in: hypocotyl-root boundary, anther-filament junction in flowers, ovule-funiculus and peduncle-silique boundaries, petioles and root. Light-regulated expression with differential response to red/far-red light. KNAT3 promoter activity showed cell-type specific pattern along longitudinal root axis, re…	-0.503048
AT5G43250	nuclear factor Y, subunit C13	-1.91231
AT5G45420	The gene encodes a MYB transcription factor belons to R2R3-MYB family of transcription factors. Knock-down mutant analysis indicates its role in root hair elongation.	-0.708726
AT5G46710	PLATZ transcription factor family protein	-1.2084
AT5G47230	encodes a member of the ERF (ethylene response factor) subfamily B-3 of ERF/AP2 transcription factor family (ATERF-5). The protein contains one AP2 domain. There are 18 members in this subfamily including ATERF-1, ATERF-2, AND ATERF-5. The mRNA is cell-to-cell mobile.	1.79173
AT5G47390	Encodes a circadian-regulated transcription factor which specifically controls cell expansion during leaf development by controlling ROS homeostasis. The mRNA is cell-to-cell mobile.	0.461033
AT5G47640	nuclear factor Y, subunit B2	1.01771
AT5G47660	Homeodomain-like superfamily protein	-0.87277
AT5G48150	Member of GRAS gene family. Semi-dominant mutant has a reduced response to far-red light and appears to act early in the phytochrome A signaling pathway.	0.857197
AT5G51980	Transducin/WD40 repeat-like superfamily protein	-0.796722
AT5G52010	C2H2-like zinc finger protein	-0.729878
AT5G56270	Encodes WRKY transcription factor 2, a zinc-finger protein. In wrky2 mutants, egg cells polarize normally but zygotes fail to reestablish polar organelle positioning from a transient symmetric state, resulting in equal cell division and distorted embryo development.	0.908228
AT5G57180	Transcription regulator responsible for specific upregulation of the translocon genes atToc33 and atToc75 in leaves. Involved in protein import into chloroplast.	-0.978731
AT5G57620	MYB36 is a transcriptional regulator that acts to promote differentiation of the endodermis during root development. It promotes the development the Casparian band in part by regulating the expression of genes involved in localizing lignin biosynthetic machinery to the Casparian band. MYB36 binds to and regulates the expression of factors involved in producing the Casparian band including CASP1, …	0.997841
AT5G58340	myb-like HTH transcriptional regulator family protein	0.994314
AT5G59430	Encodes a telomeric repeat binding protein with a DNA binding domain at its C terminus. The DNA binding domain has a preference for GGTTTAG sequences and at least five of these repeats are required for recognition by a nearly full-length TRP1 protein.	0.414083
AT5G59820	Encodes a zinc finger protein involved in high light and cold acclimation. Overexpression of this putative transcription factor increases the expression level of 9 cold-responsive genes and represses the expression level of 15 cold-responsive genes, including CBF genes. Also, lines overexpressing this gene exhibits a small but reproducible increase in freeze tolerance. Because of the repression o…	0.962715
AT5G61590	Encodes an AP2/ERF-type transcription factor that is preferentially expressed in the epidermis and induced by darkness and negatively regulates cuticular wax biosynthesis.	0.744332
AT5G61600	encodes a member of the ERF (ethylene response factor) subfamily B-3 of ERF/AP2 transcription factor family. The protein contains one AP2 domain. There are 18 members in this subfamily including ATERF-1, ATERF-2, AND ATERF-5.	0.918958
AT5G62020	member of Heat Stress Transcription Factor (Hsf) family The mRNA is cell-to-cell mobile.	0.697879
AT5G63790	Encodes a member of the NAC family of transcription factors. ANAC102 appears to have a role in mediating response to low oxygen stress (hypoxia) in germinating seedlings. Its expression can be induced by beta-cyclocitral, an oxidized by-product of beta-carotene generated in the chloroplasts, mediates a protective retrograde response that lowers the levels of toxic peroxides and carbonyls, limitin…	0.711204
AT5G64220	CAMTA2 proteins bind to the AtALMT1 promoter at in vitro. The gene itself is Al inducible, and AtALMT1 expression is partially repressed in camta2 mutant. The mRNA is cell-to-cell mobile.	0.473434
AT5G64810	member of WRKY Transcription Factor; Group II-c. Involved in jasmonic acid inducible defense responses.	2.03837
AT5G64980	transcription factor	-1.42901
AT5G65910	BSD domain-containing protein	1.07428
AT5G66730	C2H2-like zinc finger protein	0.46026

## Sheet: Protein modification
Locus identifier	Gene Model Description	log2(larp1+T2/larp1) mRNA levels
AT1G01140	Encodes a CBL-interacting protein kinase with similarity to SOS2	0.553986
AT1G01560	Member of MAP Kinase family. Flg22-induced activation is blocked by AvrRpt2.	3.55248
AT1G02920	Encodes glutathione transferase belonging to the phi class of GSTs. Naming convention according to Wagner et al. (2002).	1.32721
AT1G03590	Protein phosphatase 2C family protein	0.68142
AT1G03740	Protein kinase superfamily protein	1.03594
AT1G04440	Member of CKL gene family (CKL-C group).	0.384288
AT1G04700	PB1 domain-containing protein tyrosine kinase	-0.831039
AT1G06700	Protein kinase superfamily protein	-0.452655
AT1G08420	BRI1 suppressor 1 (BSU1)-like 2	-0.663092
AT1G09210	Encodes one of three Arabidopsis calreticulins.Post-transcriptionally regulates together with CRT1 VAMP721/722 levels under ER stress.	-0.898664
AT1G09970	RLK7 belongs to a leucine-rich repeat class of receptor-likekinase (LRR-RLKs). It is involved in the control of germination speed and the tolerance to oxidant stress. The mRNA is cell-to-cell mobile.	0.336151
AT1G10430	Encodes one of the isoforms of the catalytic subunit of protein phosphatase 2A: AT1G59830/PP2A-1, AT1G10430/PP2A-2, At2g42500/PP2A-3, At3g58500/PP2A-4 [Plant Molecular Biology (1993) 21:475-485 and (1994) 26:523-528; Note that in more recent publications, there is mixed use of gene names for PP2A-3 and PP2A-4 - some refer to At2g42500 as PP2A-3 and some as PP2A-4]. It regulates the activation of …	-0.682887
AT1G11390	Protein kinase superfamily protein	-0.768286
AT1G12460	Leucine-rich repeat protein kinase family protein	-0.620087
AT1G12680	phosphoenolpyruvate carboxylase-related kinase 2	0.883368
AT1G13320	one of three genes encoding the 65 kDa regulatory subunit of protein phosphatase 2A (PP2A)	-0.401952
AT1G14370	Encodes protein kinase APK2a. Protein is N-myristoylated.	0.715472
AT1G16150	Encodes a WAK-like receptor-like kinase with a cytoplasmic Ser/Thr protein kinase domain and an extracellular domain with EGF-like repeats. Likely involved in Arabidopsis root mineral responses to Zn2+, Cu2+, K+, Na+ and Ni+. The mRNA is cell-to-cell mobile.	1.52518
AT1G16160	WAK-like kinase The mRNA is cell-to-cell mobile.	1.55515
AT1G17170	Encodes glutathione transferase belonging to the tau class of GSTs. Naming convention according to Wagner et al. (2002). It is involved in the detoxification of the environmental pollutant 2,4,6-trinitrotoluene. Arabidopsis plants over-expressing At1g17170 were more resistant to TNT, removed more TNT from sterile and soil-based media, and had reduced levels of glutathione when grown in the presen…	1.18357
AT1G17880	basic transcription factor 3	-0.633612
AT1G18390	Serine/Threonine kinase family catalytic domain protein	1.18866
AT1G20650	Protein kinase superfamily protein	0.856226
AT1G20810	FKBP-like peptidyl-prolyl cis-trans isomerase family protein	0.533408
AT1G21270	cytoplasmic serine/threonine protein kinase induced by salicylic acid. mutant plants exhibit a loss of cell expansion and dependence on sugars and salts for seedling growth, affecting the expression and activity of vacuolar invertase.	1.00699
AT1G22280	Encodes a phytochrome-associated protein, PAPP2C (phytochrome-associated protein phosphatase type 2C). PAPP2C interacts in the nucleus with phyA (phytochrome A) and phyB. Functions as a regulator of phytochrome-interacting factor PIF3 by dephosphorylating phytochromes in the nucleus.	0.862504
AT1G25390	Protein kinase superfamily protein	0.873495
AT1G25490	One of three genes encoding phosphoprotein phosphatase 2A regulatory subunit A; Recessive ethylene-response mutant EER1 displays increased ethylene sensitivity in the hypocotyl and stem	-0.491595
AT1G34130	Encodes homolog of yeast STT3, a subunit of oligosaccharyltransferase.	-0.632967
AT1G35620	Encodes a protein disulfide isomerase-like (PDIL) protein, a member of a multigene family within the thioredoxin (TRX) superfamily. Unlike several other PDI family members, transcript levels for this gene are not up-regulated in response to three different chemical inducers of ER stress (dithiothreitol, beta-mercaptoethanol, and tunicamycin). However, the level of transcripts for this gene is sli…	-0.430187
AT1G45145	encodes a cytosolic thioredoxin that reduces disulfide bridges of target proteins by the reversible formation of a disulfide bridge between two neighboring Cys residues present in the active site. Thioredoxins have been found to regulate a variety of biological reactions in prokaryotic and eukaryotic cells.	0.928606
AT1G45160	Protein kinase superfamily protein	-0.362867
AT1G48260	Encodes a member of the SNF1-related kinase (SnRK) gene family (SnRK3.21), which has also been reported as a member of the CBL-interacting protein kinases (CIPK17).	1.16663
AT1G49580	Calcium-dependent protein kinase (CDPK) family protein	-0.487696
AT1G49630	Zinc metalloprotease pitrilysin subfamily A. Signal peptide degrading enzyme targeted to mitochondria and chloroplasts. Expressed in flower, leaf and root. Not expressed in silique and shoot.	-0.738109
AT1G51170	Encodes an active AGC VIII protein kinase that interacts with the putative transcription factor ATS and regulates planar growth during integument development in the ovule. Mutants exhibit ectopic growth in filaments and petals, as well as aberrant embryogenesis.	0.886967
AT1G51660	Encodes a mitogen-activated map kinase kinase (there are nine in Arabidopsis) involved in innate immunity. This protein activates MPK3/MPK6 and early-defense genes redundantly with MKK5. In plants with both MKK5 and MKK4 levels reduced by RNAi plants, floral organs do not abscise suggestion a role for both proteins in mediating floral organ abscission. The mRNA is cell-to-cell mobile.	-0.634592
AT1G51980	Insulinase (Peptidase family M16) protein	-0.780868
AT1G53440	Leucine-rich repeat transmembrane protein kinase	0.836989
AT1G53680	Encodes glutathione transferase belonging to the tau class of GSTs. Naming convention according to Wagner et al. (2002).	-2.54472
AT1G53720	Encodes a cyclophilin, member of a family modular proteins consisting of a peptidyl-prolyl cis? trans isomerase (PPIase) domain, followed by an RNA recognition motif (RRM), and a C-terminal domain enriched in charged amino acids. Interacts with with SCL33/SR33 and with a majority of Arabidopsis SR proteins and the largest subunit of RNA polymerase II. Localizes to the nucleus, but it does not sig…	-0.807448
AT1G53730	STRUBBELIG-receptor family 6	0.395372
AT1G54820	Protein kinase superfamily protein	0.609151
AT1G56140	Leucine-rich repeat transmembrane protein kinase	0.479462
AT1G59580	encodes a mitogen-activated kinase involved in innate immunity The mRNA is cell-to-cell mobile.	0.492317
AT1G59700	Encodes glutathione transferase belonging to the tau class of GSTs. Naming convention according to Wagner et al. (2002). The mRNA is cell-to-cell mobile.	0.720478
AT1G61360	S-locus lectin protein kinase family protein	1.4246
AT1G61370	S-locus lectin protein kinase family protein	1.11859
AT1G61640	Protein kinase superfamily protein	-1.31076
AT1G61790	Encodes the OST3/6 subunit of the hetero-oligomeric plant oligosaccharyltransferase complex (OST). Also identified by GWAS as having a role in interspecific pollen tube recognition.	-0.510851
AT1G62950	leucine-rich repeat transmembrane protein kinase family protein	-0.785819
AT1G66880	Protein kinase superfamily protein	0.806281
AT1G67490	Encodes an alpha-glucosidase I enzyme that catalyzes the first step in N-linked glycan processing. Localized to the endoplasmic reticulum (ER).	-0.726507
AT1G68410	Protein phosphatase 2C family protein	0.3989
AT1G68690	Encodes a member of the proline-rich extensin-like receptor kinase (PERK) family. This family consists of 15 predicted receptor kinases (PMID: 15653807).	1.13678
AT1G68830	STN7 protein kinase; required for state transitions, phosphorylation of the major antenna complex (LHCII) between PSII and PSI, and light adaptation. STN7 is involved in state transitions.	0.667038
AT1G69920	Encodes glutathione transferase belonging to the tau class of GSTs. Naming convention according to Wagner et al. (2002).	5.23054
AT1G70460	Encodes a member of the proline-rich extensin-like receptor kinase (PERK) family. This family consists of 15 predicted receptor kinases (PMID: 15653807).	-0.776789
AT1G71220	Encodes UDP-glucose:glycoprotein glucosyltransferase. Non-receptor component required for EFR-mediated immunity. Mutants show de-repressed anthocyanin accumulation in the presence of elf18, and EFR accumulation and signalling.	-0.595639
AT1G71860	Encodes a protein with tyrosine phosphatase activity that is downregulated in response to cold and upregulated in response to salt stress.	0.500547
AT1G72300	Encodes a leucine-rich repeat receptor kinase (LRR-RK) involved in the perception of PSY1. PSY1 is an 18-aa tyrosine-sulfated glycopeptide encoded by AT5G58650 that promotes cellular proliferation and expansion.	0.543449
AT1G73230	Nascent polypeptide-associated complex NAC	-0.767704
AT1G74590	Encodes glutathione transferase belonging to the tau class of GSTs. Naming convention according to Wagner et al. (2002).	1.94584
AT1G75820	Putative receptor kinase with an extracellular leucine-rich domain. Controls shoot and floral meristem size, and contributes to establish and maintain floral meristem identity. Negatively regulated by KAPP (kinase-associated protein phosphatase). CLV3 peptide binds directly CLV1 ectodomain.	0.407384
AT1G76040	member of Calcium Dependent Protein Kinase	1.10701
AT1G76400	Ribophorin I	-0.921789
AT1G79670	Encodes a receptor-like kinase that does not contain an extracellular leucine-rich repeat domain. A novel type of dominant disease-resistance protein that confers resistance to a broad spectrum of Fusarium races.	0.725793
AT1G80410	Encodes the catalytic subunit of a N-terminal acetyltransferase.	-0.52319
AT2G01270	Encodes a protein disulfide isomerase-like (PDIL) protein, a member of a multigene family within the thioredoxin (TRX) superfamily. This protein also belongs to the quiescin-sulfhydryl oxidase (QSOX) family, which possess an Erv1-like domain at the COOH terminus in addition to a TRX domain.	-0.515328
AT2G01450	MPK17 Map kinase family member. Mutants have increased numbers of peroxisomes a phenotype that can be suppressed by mutations in PMD1. This and other treatments, suggests a function in control of peroxisome proliferation in salt stress.	0.537333
AT2G02220	Encodes a protein interacting with phytosulfokine, a five amino acid sulfated peptide (YIYTQ). Contains dual guanylate cyclase and kinase catalytic activities that operate in vivo.	0.602362
AT2G02800	Encodes protein kinase APK2b.	0.591741
AT2G03120	homologous to Signal Peptide Peptidases (SPP), required for pollen development and pollen germination. No homozygotes could be recovered from a T-DNA insertion mutant. The mRNA is cell-to-cell mobile.	-0.747922
AT2G07180	Protein kinase superfamily protein	0.748442
AT2G15790	SQN encodes the Arabidopsis homolog of cyclophilin 40 (CyP40). It is specifically required for the vegetative but not the reproductive maturation of the shoot. Belongs to one of the 36 carboxylate clamp (CC)-tetratricopeptide repeat (TPR) proteins (Prasad 2010, Pubmed ID: 20856808) with potential to interact with Hsp90/Hsp70 as co-chaperones.	-1.25364
AT2G17520	Encodes a endoribonuclease/protein kinase IRE1-like protein that is predicted to form a type I transmembrane protein structure and contain kinase/endoribonuclease domains at their C-terminal halves. The transcript levels for several ER-stress responsive genes, including six protein disulfide isomerases (PDIs), BiP2, and AtbZIP60 are not affected in ire1-2 null mutants. The mRNA is cell-to-cell mo…	0.53627
AT2G20850	STRUBBELIG-receptor family 1	-0.66529
AT2G23450	Protein kinase superfamily protein	0.486138
AT2G24360	STYK serine threonine kinase that phosphorylates several oil body proteins including OLE1 and CLO4/CAL4.	0.564771
AT2G24990	Serine/threonine-protein kinase Rio1	-1.22388
AT2G25790	Leucine-rich receptor-like protein kinase family protein	0.671604
AT2G26980	encodes a serine-threonine protein kinase whose expression increases in response to abscisic acid, cold, drought, high salt, and wounding conditions. The gene is expressed in developing seeds and seedlings. Lines carrying a T-DNA insertions have reduced germination efficiency and expression of cold, high-salt, and abscisic acid marker genes are altered, but not drought-response markers.	-0.884838
AT2G27210	BRI1 suppressor 1 (BSU1)-like 3	-0.571387
AT2G29220	Concanavalin A-like lectin protein kinase family protein	6.32328
AT2G29400	Type 1 protein phosphatase, expressed in roots, rosettes and flowers	0.514807
AT2G30440	Encodes a thylakoidal processing peptidase that removes signal sequences from proteins synthesized in the cytoplasm and transported into the thylakoid lumen. The mRNA is cell-to-cell mobile.	0.78423
AT2G30870	early dehydration-induced gene ERD13 homologous to tobacco and maize glutathione S-transferases. Encodes glutathione transferase belonging to the phi class of GSTs. Naming convention according to Wagner et al. (2002)	0.618273
AT2G31800	Integrin-linked protein kinase family	0.605036
AT2G31865	poly(ADP-ribose) glycohydrolase 2	2.26192
AT2G31880	Encodes a putative leucine rich repeat transmembrane protein that is expressed in response to Pseudomonas syringae. Expression of SRRLK may be required for silencing via lsiRNAs. Regulates cell death and innate immunity.	0.846805
AT2G32920	Encodes a protein disulfide isomerase-like (PDIL) protein, a member of a multigene family within the thioredoxin (TRX) superfamily. Transcript levels for this gene are up-regulated in response to three different chemical inducers of ER stress (dithiothreitol, beta-mercaptoethanol, and tunicamycin). AtIRE1-2 does not appear to be required for this response, but the atbzip60 mutant has a diminished…	-0.887489
AT2G33700	Encodes a putative protein phosphatase 2C that positively regulates salt tolerance in abscisic acid-dependent manner.	0.59985
AT2G35050	kinase superfamily with octicosapeptide/Phox/Bem1p domain-containing protein	0.332263
AT2G35320	homologue of the animal Eyes Absent genes. encodes a tyrosine-specific phosphatase. the protein sequence lacks the cys-containing signature of the classical tyrosine phosphatases. belongs to the aspartate-based phosphatases. The enzyme activity is strictly metal-dependent.	0.692666
AT2G35680	Encodes a phosphatidylglycerophosphate (PGP) phosphatase involved in the synthesis of plastidial Phosphatidylglycerol (PG) in conjunction with PGPP1 and PTPMT2 in root. PTPMT1 levels were higher in node, cauline leaf, and flower than in root, leaf, and stem.	0.784432
AT2G37710	Induced in response to Salicylic acid. The mRNA is cell-to-cell mobile.	0.498298
AT2G38130	Encodes the Arabidopsis homolog of the yeast protein MAK3, a component of the N-terminal acetyltransferase complex C. In mutant plants, synthesis of plastome-encoded photosystem II core proteins D1 and CP47 is affected resulting in fewer thylakoid multiprotein complexes.	0.555763
AT2G39000	Encodes a chloroplast localized n-acetyltransfefase involved in N-terminal protein amino acid acetylation.	1.28294
AT2G40270	Protein kinase family protein	0.635023
AT2G43560	FKBP-like peptidyl-prolyl cis-trans isomerase family protein	0.452576
AT2G44680	Encodes casein kinase II beta chain, a CK2 regulatory subunit. Nuclear-localized CKB4 protein exists in vivo as different isoforms, resulting from phosphorylation on serine residues. The phosphorylated isoforms are the preferred substrate for ubiquitination and degradation by the proteasome pathway. Involved in regulation of circadian clock.	0.743018
AT2G47060	Encodes Pto-interacting 1-4 (PTI1-4), a member of the PTI1-like serine/threonine protein kinases that share strong sequence identity to the tomato PTI1 kinase.	0.51855
AT3G01380	sulfatase and phosphatidylinositolglycan class N domain-containing protein	-0.996546
AT3G02090	Insulinase (Peptidase family M16) protein	-0.624269
AT3G03770	Leucine-rich repeat protein kinase family protein	-0.414792
AT3G04810	Encodes AtNek2, a member of the NIMA-related serine/threonine kinases (Neks) that have been linked to cell-cycle regulation in fungi and mammals. Plant Neks might be involved in plant development processes.	-0.690725
AT3G05050	Protein kinase superfamily protein	-0.504839
AT3G05580	Encodes a Type One Protein Phosphatase that acts as a nucleocytoplasmic negative regulator of tip growth. Mutants affect pollen germination, pollen tube growth, and root hair growth. It acts genetically downstream of ANX1 (AT3G04690) and ANX2 (AT5G28680).	0.669695
AT3G05840	encodes a SHAGGY-like kinase involved in meristem organization.	0.304302
AT3G07070	Protein kinase superfamily protein	-2.38796
AT3G07140	GPI transamidase component Gpi16 subunit family protein	-0.794775
AT3G07700	ABC1K7 is a member of an atypical protein kinase family that is induced by salt stress. Loss of function mutations affect the metabolic profile of chloroplast lipids. It appears to function along with ABC1K8 in mediating lipid membrane changes in response to stress.	0.492272
AT3G07980	MAP3K epsilon protein kinase 2 is functionally redundant with MAP3Ke1. Required for pollen development but not essential.	-0.955527
AT3G08720	Encodes a ribosomal-protein S6 kinase. Gene expression is induced by cold and salt (NaCl). Activation of AtS6k is regulated by 1-naphthylacetic acid and kinetin, at least in part, via a lipid kinase-dependent pathway. Phosphorylates specifically mammalian and plant S6 at 25 degrees C but not at 37 degrees C. Involved in translational up-regulation of ribosomal proteins.	0.722058
AT3G08730	Encodes a protein-serine kinase that phosphorylates ribosomal protein in vitro. Activation of AtS6k is regulated by 1-naphthylacetic acid and kinetin, at least in part, via a lipid kinase-dependent pathway. Involved in translational up-regulation of ribosomal proteins. Phosphorylated by PDK1. Interacts with RAPTOR1, which in turn interacts with TOR. SPK6 activity is affected by osmotic stress, an…	-0.757884
AT3G09270	Encodes glutathione transferase belonging to the tau class of GSTs. Naming convention according to Wagner et al. (2002).	0.712114
AT3G09880	Encodes B' regulatory subunit of PP2A (AtB'beta). Functions redundantly with the alpha subunit do maintain sister chromatid cohesion during meiosis.	-0.656514
AT3G10940	Encodes a protein with a predicted dual-specificity phosphatase domain, similar to the glucan phosphorylases SEX4 and LSF1, however, it lacks the carbohydrate binding domain present in those proteins. Has phosphoglucan phosphatase activity. It binds to starch and specifically hydrolyzes phosphate from the C3-position.	0.787107
AT3G11450	Encodes a ZRF1 chromatin regulator. Functions in regulating plant growth and development.	-0.645907
AT3G12340	FKBP-like peptidyl-prolyl cis-trans isomerase family protein	-1.35607
AT3G12390	Nascent polypeptide-associated complex (NAC), alpha subunit family protein	-0.852644
AT3G14370	The WAG2 and its homolog, WAG1 each encodes protein-serine/threonine kinase that are nearly 70% identical to PsPK3 protein. All three together with CsPK3 belong to PsPK3-type kinases. At the N-terminus, all four possess a serine/threonine-rich domain. They are closely related to Arabidopsis kinases PINOID. wag1/wag2 double mutants exhibit a pronounced wavy root phenotype when grown vertically on …	-1.06617
AT3G16480	mitochondrial processing peptidase alpha subunit	-0.757865
AT3G16530	Lectin like protein whose expression is induced upon treatment with chitin oligomers.	1.10474
AT3G17410	Positively regulates ABA-mediated physiological responses via phosphorylation on RCAR3/ RCAR11.	0.614211
AT3G17750	Encodes a member of a plant-specific subgroup in the DYRK (dual-specificity tyrosine phosphorylation-regulated kinase) family.	-0.504043
AT3G19420	Encodes a phosphatase with low in vitro tyrosine phosphatase activity that is capable of dephosphorylating in vitro the 3'phosphate group of PI3P, PI(3,4)P2, and PI(3,5)P2 and may be an effector of lipid signaling. The mRNA is cell-to-cell mobile.	0.490077
AT3G20410	calmodulin-domain protein kinase CDPK isoform 9 (CPK9)	-0.861758
AT3G21220	Encodes a mitogen-activated kinase kinase, dual specific protein kinase that is expressed in vegetative tissues and floral buds. Involved in innate immunity. This protein activates MPK3/MPK6 and early-defense genes redundantly with MKK4. In plants with both MKK5 and MKK4 levels reduced by RNAi plants, floral organs do not abscise suggesting a role for both proteins in mediating floral organ absci…	-0.979625
AT3G21340	Leucine-rich repeat protein kinase family protein	-1.85506
AT3G22420	Encodes a member of the WNK family (9 members in all) of protein kinases, the structural design of which is clearly distinct from those of other known protein kinases, such as receptor-like kinases and mitogen-activated protein kinases. Its transcription is under the control of circadian rhythms.	0.682805
AT3G23340	Member of CKL gene family (CKL-C group).	0.584331
AT3G25230	Encodes a a high molecular weight member of the FK506 binding protein (FKBP) family. It has three FKBP12-like domains, tetratricopeptide repeats, and a putative calmodulin binding domain. Modulates thermotolerance by interacting with HSP90.1 and affecting the accumulation of HsfA2-regulated sHSPs. Belongs to one of the 36 carboxylate clamp (CC)-tetratricopeptide repeat (TPR) proteins (Prasad 2010…	-1.046
AT3G25250	Arabidopsis protein kinase The mRNA is cell-to-cell mobile.	2.27693
AT3G26700	Protein kinase superfamily protein	-0.696776
AT3G27560	encodes a protein with kinase domains, including catalytic domains for serine/threonine as well as tyrosine kinases. a member of multi-gene family and is expressed in all tissues examined.	0.735925
AT3G28450	Leucine-rich repeat protein kinase family protein	0.678041
AT3G44600	Cyclophilin71 is a WD40 domain cyclophilin, which functions in gene repression, organogenesis and meristem development. CYP71 physically interacts with histone H3.	-0.657628
AT3G44850	Protein kinase superfamily protein	-0.781616
AT3G45040	Encodes a putative dolichol kinase that is localized to the endoplasmic reticulum and involved in pollen tube reception in the female gametophyte.	0.82102
AT3G45410	encodes a receptor-like kinase that has serine/threonine kinase activity whose expression is induced by high salt stress. This induction is inhibited by tobacco ethylene receptor.	0.70322
AT3G45640	Encodes a mitogen-activated kinase whose mRNA levels increase in response to touch, cold, salinity stress and chitin oligomers.Also functions in ovule development. Heterozygous MPK3 mutants in a homozygous MPK6 background are female sterile due to defects in integument development. MPK3 can be dephosphorylated by MKP2 in vitro. The mRNA is cell-to-cell mobile.	1.27259
AT3G48190	Encodes a homolog of the human ATM gene, which is mutated in ataxia telangiectasia, a chromosome instability disorder. Characterization of mutants suggest a role homologous recombination for DNA damage repair in response to ionizing radiation as well as during meiosis. The protein has kinase domains and shows kinase activity in orthologs. There is also evidence that ATM might be involved in the t…	-0.897815
AT3G49670	Encodes a CLAVATA1-related receptor kinase-like protein required for both shoot and flower meristem function. Very similar to BAM1,with more than 85% a.a. identity. It has a broad expression pattern and is involved in vascular strand development in the leaf, control of leaf shape, size and symmetry, male gametophyte development and ovule specification and function. Anthers of double mutants (bam1…	-0.376184
AT3G51270	protein serine/threonine kinase	-0.676002
AT3G51370	Protein phosphatase 2C family protein	0.478687
AT3G51470	Protein phosphatase 2C family protein	-1.6631
AT3G56070	rotamase cyclophilin 2 (ROC2) exhibiting peptidyl-prolyl cis-trans isomerase activity involved in signal transduction.	-0.492487
AT3G56370	Leucine-rich repeat protein kinase family protein	-0.752356
AT3G57530	Calcium-dependent Protein Kinase. ABA signaling component that regulates the ABA-responsive gene expression via ABF4. AtCPK32 has autophosphorylation activity and can phosphorylate ABF4 in vitro	0.346124
AT3G58640	Mitogen activated protein kinase kinase kinase-like protein	0.371335
AT3G59110	Protein kinase superfamily protein	0.458158
AT3G59410	Encodes an eIF2alpha kinase that can bind uncharged tRNA via its C-terminus and can phosphorylate both eIF2alpha homologues in Arabidopsis.	-0.637461
AT3G59700	Member of Receptor kinase-like protein family. Represses stomatal immunity induced by Pseudomonas syringae pv. tomato DC3000.	0.845575
AT3G62950	Encodes a member of the CC-type glutaredoxin (ROXY) family that has been shown to interact with the transcription factor TGA2 and suppress ORA59 promoter activity.	2.11246
AT3G63280	Encodes AtNek4, a member of the NIMA-related serine/threonine kinases (Neks) that have been linked to cell-cycle regulation in fungi and mammals. Plant Neks might be involved in plant development processes.	0.967255
AT3G63340	kinase superfamily protein	0.447383
AT3G63400	Cyclophilin-like peptidyl-prolyl cis-trans isomerase family protein	-0.621964
AT3G66654	Cyclophilin-like peptidyl-prolyl cis-trans isomerase family protein	0.673982
AT4G02010	Protein kinase superfamily protein	-0.51427
AT4G02520	Encodes glutathione transferase belonging to the phi class of GSTs. Naming convention according to Wagner et al. (2002). The expression of this gene is upregulated by herbicide safeners such as benoxacor and fenclorim.	1.03156
AT4G04960	Concanavalin A-like lectin protein kinase family protein	0.718143
AT4G05200	Encodes a cysteine-rich receptor-like protein kinase.	0.882126
AT4G06599	ubiquitin family protein	-0.582179
AT4G08850	MIK1 encodes a receptor kinase that forms a complex with MDIS1/MIK2 and binds LURE1, the female pollen guidance chemi-attractant. MIK1 phosphorylates MDIS1 and is autophosphorylated.	0.882519
AT4G10480	Nascent polypeptide-associated complex (NAC), alpha subunit family protein	-1.11957
AT4G11240	encodes a type I serine/threonine protein phosphatase expressed in expressed in roots, rosettes and flowers.	-0.758727
AT4G11330	MAP kinase	0.780986
AT4G14580	CBL-interacting protein kinase	0.922656
AT4G15680	Encodes a member of the CC-type glutaredoxin (ROXY) family.	-1.48259
AT4G16970	Protein kinase superfamily protein	-0.970607
AT4G18250	receptor Serine/Threonine kinase-like protein	4.03226
AT4G18710	Encodes BIN2, a member of the ATSK (shaggy-like kinase) family. BIN2 functions in the cross-talk between auxin and brassinosteroid signaling pathways. BIN2 regulates root epidermal cell fate specification by phosphorylating EGL3 and TTG1. BIN2-mediated phosphorylation appears to promote BZR1 export from the nucleus. KIB1 interacts with BIN2 blocking its interaction with substrates and promotes BI…	0.547595
AT4G19830	FKBP-like peptidyl-prolyl cis-trans isomerase family protein	0.871382
AT4G20940	Encodes a plasma-membrane localized LRR receptor-like protein involved in both ABA and H202 mediated signaling involved in stomatal movement. TAIR10 annotation for this gene has a low confidence score (2-star). See Comments field for structural annotation by the community.	-0.529778
AT4G21150	ribophorin II (RPN2) family protein	-0.706788
AT4G21380	encodes a putative receptor-like serine/threonine protein kinases that is similar to Brassica self-incompatibility (S) locus. Expressed in root. Shoot expression limited to limited to the root-hypocotyl transition zone and at the base of lateral roots as well as in axillary buds, and pedicels.	2.03289
AT4G22130	STRUBBELIG-receptor family 8	-0.744285
AT4G23190	Encodes putative receptor-like protein kinase that is induced by the soil-borne vascular bacteria, Ralstonia solanacearum. Naming convention from Chen et al 2003 (PMID 14756307)	1.70718
AT4G23270	Encodes a cysteine-rich receptor-like protein kinase. The mRNA is cell-to-cell mobile.	0.88735
AT4G23650	Encodes calcium dependent protein kinase 3 (CPK3), a member of the Arabidopsis CDPK gene family. CDPKs contain an intrinsic Ca2+-activation domain with four EF hand Ca2+-binding sites. CDPKs protein kinases have been proposed to function in multiple plant signal transduction pathways downstream of [Ca2+]cyt elevations, thus transducing various physiological responses. CPK3 is expressed in both gu…	-0.364903
AT4G25340	Encodes a member of the FKBP-type immunophilin family that functions as a histone chaparone. Binds to 18S rDNA and represses its expression.	-0.842426
AT4G28350	Concanavalin A-like lectin protein kinase family protein	1.6618
AT4G28730	Encodes a glutaredoxin GrxC5. GrxC5 exists as two forms when expressed in Escherichia coli. The monomeric apoprotein possesses deglutathionylation activity mediating the recycling of plastidial methionine sulfoxide reductase B1 and peroxiredoxin IIE, whereas the dimeric holoprotein incorporates a [2Fe-2S] cluster.	-0.724352
AT4G28860	Member of CKL gene family (CKL-A group)	0.53976
AT4G28880	Member of CKL gene family (CKL-A group)	0.400236
AT4G30520	Encodes SARK (SENESCENCE-ASSOCIATED RECEPTOR-LIKE KINASE). Regulates leaf senescence through synergistic actions of auxin and ethylene. It is one of a group of LRR-RLKs, designated as CLAVATA3 INSENSITIVE RECEPTOR KINASES (CIKs), that act as co-receptors and have essential roles in regulating CLV3-mediated stem cell homeostasis.	0.69179
AT4G30960	Encodes CBL-interacting protein kinase 6 (CIPK6). Required for development and salt tolerance. The mRNA is cell-to-cell mobile.	0.894982
AT4G31170	Protein kinase superfamily protein	0.387054
AT4G31860	Protein phosphatase 2C family protein	0.729883
AT4G33040	Encodes a member of the CC-type glutaredoxin (ROXY) family that has been shown to interact with the transcription factor TGA2.	1.23775
AT4G33910	2-oxoglutarate (2OG) and Fe(II)-dependent oxygenase superfamily protein	0.923134
AT4G33920	Protein phosphatase 2C family protein	0.445677
AT4G35780	ACT-like protein tyrosine kinase family protein	0.463119
AT4G36080	Component of the SPT module of the SAGA complex.	-0.6078
AT5G01550	Encodes LecRKA4.2, a member of the lectin receptor kinase subfamily A4 (LecRKA4.1 At5g01540; LecRKA4.2 At5g01550; LecRKA4.3 At5g01560). Together with other members of the subfamily, functions redundantly in the negative regulation of ABA response in seed germination.	1.43861
AT5G01810	Encodes a CBL-interacting serine/threonine protein kinase, also has similarities to SOS2 kinase.	0.783171
AT5G01890	Leucine-rich receptor-like protein kinase family protein	-0.795356
AT5G02790	Glutathione S-transferase family protein	0.718236
AT5G04540	Myotubularin-like phosphatases II superfamily	-0.6847
AT5G06110	Encodes a ZRF1 chromatin regulator. Functions in regulating plant growth and development.	-1.53184
AT5G07340	Calreticulin family protein	-0.868229
AT5G08160	Encodes a serine/threonine protein kinase.	-0.438082
AT5G08590	Encodes a member of SNF1-related protein kinases (SnRK2) whose activity is activated by ionic (salt) and non-ionic (mannitol) osmotic stress. Similar to the calcium/calmodulin-dependent protein kinase subfamily and the SNF1 kinase subfamily.	0.370141
AT5G09310	Encodes a gamma-secretase subunit. Associates with other subunits in intracellular membrane compartments.	0.953207
AT5G09890	Protein kinase family protein	-0.43027
AT5G13410	FKBP-like peptidyl-prolyl cis-trans isomerase family protein	0.638743
AT5G13850	nascent polypeptide-associated complex subunit alpha-like protein 3	-0.408289
AT5G14640	shaggy-like kinase 13	0.475894
AT5G16590	Leucine-rich repeat protein kinase family protein	-0.568401
AT5G18580	fass mutants have aberrant cell shapes due to defects in arrangement of cortical microtubules. Encodes a protein highly conserved in higher plants and similar in its C-terminal part to B' regulatory subunits of type 2A protein phosphatases. Interacts with an Arabidopsis type A subunit of PP2A in the yeast two-hybrid system.	0.552545
AT5G18700	Encodes a microtubule-associated kinase-like protein RUNKEL (RUK). Contains a putative serine/threonine kinase domain and a microtubule-binding domain. RUK directly binds to microtubules in vitro and colocalizes with mitotic preprophase band, spindle, and phragmoplast in vivo. Required for cell plate expansion in cytokinesis.	-0.624164
AT5G19690	encodes an oligosaccharyl transferase involved response to high salt. Mutants are hypersensitive to high salt conditions The mRNA is cell-to-cell mobile.	-0.986094
AT5G22840	Protein kinase superfamily protein	-0.763477
AT5G25930	kinase family with leucine-rich repeat domain-containing protein	1.5301
AT5G26751	Encodes a SHAGGY-related kinase involved in meristem organization. It regulates the redox stress response by phosphorylating glucose-6-phosphate dehydrogenase 6.Functions as a positive regulator of salt stress tolerance. Phosphorylates and enhances G6PD6 (At5g40760) activity	0.341512
AT5G27840	Encodes a Type One Protein Phosphatase that acts as a nucleocytoplasmic negative regulator of tip growth. Mutants affect pollen germination, pollen tube growth, and root hair growth. It acts genetically downstream of ANX1 (AT3G04690) and ANX2 (AT5G28680).	0.675847
AT5G35100	Cyclophilin-like peptidyl-prolyl cis-trans isomerase family protein	0.765383
AT5G35220	Membrane-associated and ATP-independent metalloprotease; EGY1 protein contains eight trans-membrane domains at its C-terminus, and carries out beta-casein degradation in an ATP-independent manner. EGY1 is required for development of both thylakoid grana and a well-organized lamellae system in chloroplast. Additionally, EGY1 is required for the accumulation of chlorophyll and chlorophyll a/b bindi…	-0.751358
AT5G36250	Encodes a myristoylated 2C-type protein phosphatase that interacts with the catalytic subunit of SnRK1. The mRNA is cell-to-cell mobile.	0.733446
AT5G38990	Involved in growth adaptation upon exposure to metal ions. Contributes together with the other MDS genes to the complex network of CrRLK1Ls that positively and negatively affect growth.	0.896876
AT5G40370	Glutaredoxin family protein	0.566062
AT5G40820	Encodes a Arabidopsis ortholog of the ATR protein kinase that is involved in a wide range of responses to DNA damage and plays a central role in cell-cycle regulation. Dominant loss of function alleles identified as suppressors of ALS also exhibit increased tolerance to aluminum. This may be due to the inhibition of terminal differentiation of the root apex upon exposure to Al.	-0.758083
AT5G41210	Encodes glutathione transferase belonging to the theta class of GSTs. Naming convention according to Wagner et al. (2002).	0.439452
AT5G44290	Protein kinase superfamily protein	0.461681
AT5G46410	Encodes a SCP1-like small phosphatase (SSP). Three SSPs form a unique group with long N-terminal extensions: AT5G46410 (SSP4), AT5G11860 (SSP5), AT4G18140 (SSP4b). SSP4 and SSP4b were localized exclusively in the nuclei, whereas SSP5 accumulated in both nuclei and cytoplasm. All three SSPs encodes active CTD phosphatases like animal SCP1 family proteins, with distinct substrate specificities: SSP…	0.744862
AT5G47070	Encodes a member of the RLCK VII-4 subfamily of receptor-like cytoplasmic kinases that has been shown to phosphorylate MAPKKK5 Ser-599 and MEKK1 Ser-603, both players in PRR-mediated resistance to bacterial and fungal pathogens.	1.05539
AT5G48380	Encodes a BAK1-interacting receptor-like kinase named BIR1. Negatively regulates multiple plant resistance signaling pathways, one of which is the SOBIR1(AT2G31880)-dependent pathway.	0.508284
AT5G48580	Endoplasmic reticulum (ER) localized immunophilin protein which possesses PPIase activity. Positively regulates plant immunity in response to Phytophthora infection. Host target of PcAvr3a12 during early P. capsici infection. Involved in ER stress sensing and is required for ER stress-mediated plant immunity.	-0.553594
AT5G55220	trigger factor type chaperone family protein	-0.464891
AT5G56360	Encodes PSL4, beta-subunit of endoplasmic reticulum-resident glucosidase II, which is essential for stable accumulation and quality control of the elf18 receptor EFR but not the flg22 receptor FLS2. The mRNA is cell-to-cell mobile.	-1.00528
AT5G56460	Protein kinase superfamily protein	0.873007
AT5G57020	Arabidopsis thaliana myristoyl-CoA:protein N-myristoyltransferase.	-0.630438
AT5G57035	U-box domain-containing protein kinase family protein	0.686159
AT5G58350	Encodes a member of the WNK family (9 members in all) of protein kinases, the structural design of which is clearly distinct from those of other known protein kinases, such as receptor-like kinases and mitogen-activated protein kinases. Its transcription is under the control of circadian rhythms.	1.24204
AT5G58380	Encodes a CBL-interacting protein kinase with similarity to SOS protein kinase.	-0.649138
AT5G58770	AtCPT7 synthesizes medium-chain polyprenols of approximately 55 carbons in length. The enzyme utlizes geranylgeranyl pyrophosphate (GGPP) and isopentenyl pyrophosphate (IPP) as substrates. The enzymatic product accumulates into plastdial membranes (DOI:10.1105/tpc.16.00796).	0.768962
AT5G58950	Protein kinase superfamily protein	0.341597
AT5G60270	Concanavalin A-like lectin protein kinase family protein	0.762038
AT5G60300	Encodes a legume-type lectin receptor kinase that is structurally distinct from the mammalian extracellular ATP receptors and acts as an extracellular ATP receptor in Arabidopsis. Extracellular ATP acts as a damage-associated molecular pattern in plants, and its signaling through P2K1 is important for mounting an effective defense response against various pathogenic microorganisms. It also plays …	0.515017
AT5G61790	calnexin 1	-1.55696
AT5G62310	Encodes a protein with a serine/threonine kinase domain. There are two other closely related members in Arabidopsis. Knock-out mutation results in incomplete root hair elongation. Expression is found all organs examined but is especially strong in elongating root hairs.	-0.870332
AT5G62710	Leucine-rich repeat protein kinase family protein	-0.861188
AT5G63410	Leucine-rich repeat protein kinase family protein	0.676514
AT5G63840	radial swelling mutant shown to be specifically impaired in cellulose production. Encodes the alpha-subunit of a glucosidase II enzyme.	-0.392325
AT5G66680	Encodes a protein ortholog of human SOT48 or yeast WBP1, an essential protein subunit of the oligosaccharyltransferase (OST) complex, which is responsible for the transfer in the ER of the N-linked glycan precursor onto Asn residues of candidate proteins.	-0.700292
AT5G66880	encodes a member of SNF1-related protein kinases (SnRK2) whose activity is activated by ionic (salt) and non-ionic (mannitol) osmotic stress. Enzyme involved in the ABA signaling during seed germination, dormancy and seedling growth. The mRNA is cell-to-cell mobile.	0.802707
AT5G67080	member of MEKK subfamily	1.41641

## Sheet: Protein translocation
Locus identifier	Gene Model Description	log2(larp1+T2/larp1) mRNA levels
AT1G02280	Encodes a GTP-binding GTP-ase. Component of the chloroplast protein import machinery. Required for import of POR B into plastids. Toc33 phosphorylation may not play an important role in vivo.	-0.743167
AT1G02690	Putative importin alpha isoform. When overexpressed can rescue the impa-4 decreased transformation susceptibility phenotype.	-0.797405
AT1G06950	Encodes a protein thought to be a part of the translocon at the chloroplast inner envelope. Involved in protein import into the chloroplast and chloroplast biogenesis. C-terminal half of Tic110 functions as scaffolds for protein-protein interactions.	-0.768189
AT1G07140	Encodes a putative Ran-binding protein (siRanBP).	-0.94267
AT1G09270	Protein interacts with Agrobacterium proteins VirD2 and VirE2.	-0.427826
AT1G10390	DRA2 is a homolog of mammalian nucleoporin 98 and a likely component of the nuclear pore complex in Arabidopsis. It positively participates in the control of the hypocotyl elongation response to plant proximity and control of shade induced gene expression. Nucleoportin which redundantly inhibits flowering together with Nup98b through multiple pathways including clock, photoperiod, and age pathway…	-0.4411
AT1G14850	Encodes a protein similar to nucleoporin, a a major component of the nuclear pore complex (NPC) involved in cellular nucleo-cytoplasmic transport	-0.498475
AT1G26170	ARM repeat superfamily protein	-0.62996
AT1G27390	Form of TOM20, which is a component of the TOM complex, involved in transport of nuclear-encoded mitochondrial proteins	-0.763922
AT1G29310	SecY protein transport family protein	-0.858003
AT1G52380	NUP50 (Nucleoporin 50 kDa) protein	-0.717553
AT1G55540	Nuclear pore complex protein	-0.870977
AT1G55900	component of a translocase in the mitochondrial inner membrane	-1.07427
AT1G67680	SRP72 RNA-binding domain-containing protein	-0.593247
AT1G72560	Encodes a karyopherin, specifically the Arabidopsis ortholog of LOS1/XPOT, a protein that mediates nuclear export of tRNAs in yeast and mammals. PSD is capable of rescuing the tRNA export defect of los1 in S. cerevisiae. psd mutants display disrupted initiation of the shoot apical meristem and delay leaf initiation after germination; they also display delayed transition from vegetative to reprodu…	-0.714982
AT1G72750	translocase inner membrane subunit 23-2	-1.03897
AT1G73240	nucleoporin protein Ndc1-Nup protein	-1.22678
AT1G79280	Encodes a 237-kDA protein with similarity to vertebrate Tpr, a long coiled-coil proteins of nuclear pore inner basket filaments. It is localized to the inner surface of the nuclear envelope and is a component of the nuclear pore-associated steps of sumoylation and mRNA export in plants. Mutations affect flowering time regulation and other developmental processes. Probably acts in the same pathway…	-0.82226
AT1G79940	J domain protein localized in ER membrane. Mutants have defective pollen germination.	-0.865236
AT1G80920	A nuclear encoded soluble protein found in the chloroplast stroma. Negatively regulated by light and has rapid turnover in darkness.	1.47347
AT2G01110	mutant is Albino and pale green; Chloroplast Protein Translocation (tatC). Core subunit of the chloroplast Tat translocase. Integral chloroplast thylakoid membrane protein.	0.596646
AT2G16640	multimeric translocon complex in the outer envelope membrane 132	-0.319901
AT2G16950	TRN1 is an importin beta protein that functions as a nuclear import receptor for AtGRP7 and in interacts with AGO1 to affect miRNA loading.	-0.594346
AT2G30060	Pleckstrin homology (PH) domain superfamily protein	-0.825
AT2G31530	Encodes a component of the thylakoid-localized Sec system involved in the translocation of cytoplasmic proteins into plastid. Loss-of-function mutations result in arrest at the globular stage and embryo lethality.	-0.692149
AT2G31660	SAD2 (super sensitive to ABA and drought 2) encodes an importin beta-domain family protein likely to be involved in nuclear transport in ABA signaling. Subcellular localization of GFP-tagged SAD2 showed a predominantly nuclear localization, consistent with a role for SAD2 in nuclear transport. Mutation of SAD2 in Arabidopsis alters abscisic acid sensitivity. SAD2 was ubiquitously expressed at low…	-1.35096
AT2G34250	SecY protein transport family protein	-0.669228
AT2G36070	One of two genes in Arabidopsis that encode a putative subunit of the mitochondrial inner membrane translocase complex. TIM44 subunit is thought to provide the energy for translocation via hydrolysis of ATP.	-0.890624
AT2G37410	Mitochondrial inner membrane translocase. Together with AtTIM17-1, TIM17-2 has a long C-terminal extension not present in other TIMs. The extension is located in the outer membrane and so TIM17-2 links the inner and outer mitochondrial membranes. The C-terminal region is essential for protein import into mitochondria via the general import pathway but is not necessary for import via the carrier p…	-0.34243
AT2G39810	A novel protein with a RING finger motif near the amino terminus. Negative regulator of cold responses. Functions as an E3 ligase required for the ubiquitination of ICE1. HOS1 physically interacts with ICE1 and mediates the ubiquitination of ICE1 both in vitro and in vivo. Overexpression represses the expression of CBFs and their downstream genes and confers increased sensitivity to freezing stre…	-0.790468
AT2G45070	Sec61 Beta Subunit	-0.428059
AT2G46470	inner membrane protein OXA1-like protein	-0.617073
AT2G46520	cellular apoptosis susceptibility protein, putative / importin-alpha re-exporter	-1.28583
AT2G47450	A component of the chloroplast signal recognition particle pathway that is involved in LHCP targeting. It is downregulated in response to high light. It recognizes the DPLG motif in Lhcb1. The mRNA is cell-to-cell mobile.	-0.829903
AT3G03110	Encodes a member of the exportin family (XPO1B)which function as receptors for nuclear transport.Along with XPO1A involved in the development of male and female gametophytes.	-0.819754
AT3G06720	Encodes importin alpha involved in nuclear import. Protein interacts with Agrobacterium proteins VirD2 and VirE2. Is not individually essential for Agrobacterium-mediated root transformation, but when overexpressed can rescue the impa-4 decreased transformation susceptibility phenotype.	-0.791388
AT3G07560	Encodes peroxin 13 (PEX13) involved in protein transport into peroxisomes, for example, peroxisomal import of nitric oxide synthase.	0.502928
AT3G08943	ARM repeat superfamily protein	-1.5497
AT3G08947	ARM repeat superfamily protein	-0.615785
AT3G08960	ARM repeat superfamily protein	-0.894631
AT3G10650	Encodes a nucleoporin involved in mRNA export from the nucleus. It is also involved in the regulation of nuclear morphology.	-0.852949
AT3G11070	Outer membrane OMP85 family protein	-0.809665
AT3G14120	nuclear pore complex protein	-0.678527
AT3G16310	mitotic phosphoprotein N end (MPPN) family protein	-0.653703
AT3G16620	component of TOC complex, plastid protein import machinery.	-0.478357
AT3G17340	ARM repeat superfamily protein	-0.605793
AT3G17970	Integral chloroplast outer membrane protein. Belongs to one of the 36 carboxylate clamp (CC)-tetratricopeptide repeat (TPR) proteins (Prasad 2010, Pubmed ID: 20856808) with potential to interact with Hsp90/Hsp70 as co-chaperones.	-1.11285
AT3G20000	Encodes a component of the TOM receptor complex responsible for the recognition and translocation of cytosolically synthesized mitochondrial preproteins. With TOM22, functions as the transit peptide receptor at the surface of the mitochondrial outer membrane and facilitates the movement of preproteins into the translocation pore. The mRNA is cell-to-cell mobile.	-0.989208
AT3G27080	Component of the TOM complex involved in transport of nuclear-encoded mitochondrial proteins	-1.02888
AT3G46740	Component of the translocon outer membrane (TOC) complex. Forms the outer envelope translocation channel (beta-barrel). Plays a role in preprotein conductance. Imported into chloroplast. Expressed in young dividing photosynthetic tissues. Knockout mutants are embryo lethal with arrested development at the two-cell stage. Knockout mutants have abnormal etioplasts.	-0.958411
AT3G56900	Encodes ALADIN, a component of the nuclear pore complex.	-0.742538
AT3G57350	Nucleoporin interacting component (Nup93/Nic96-like) family protein	-0.8782
AT3G59020	ARM repeat superfamily protein	-0.99535
AT4G02150	Encodes IMPORTIN ALPHA 3. Mutant plants act as suppressors of snc1 response and salicylic acid accumulation. Located in the nucleus. Involved in protein import. Protein interacts with Agrobacterium proteins VirD2 and VirE2. Is not individually essential for Agrobacterium-mediated root transformation, but when overexpressed can rescue the impa-4 decreased transformation susceptibility phenotype.	-0.647174
AT4G02510	An integral membrane GTPase that functions as a transit-sequence receptor required for the import of proteins necessary for chloroplast biogenesis. Located in the outer chloroplast membrane. Phosphorylation of the G-domains regulate translocon assembly. The mRNA is cell-to-cell mobile.	-0.930265
AT4G16143	Protein interacts with Agrobacterium proteins VirD2 and VirE2. Is not individually essential for Agrobacterium-mediated root transformation, but when overexpressed can rescue the impa-4 decreased transformation susceptibility phenotype.	-0.513113
AT4G21180	J domain protein localized in ER membrane.	-0.671478
AT4G27640	ARM repeat superfamily protein	-0.935802
AT4G30620	Homolog of STIC2, recent duplication.	-0.735918
AT4G30840	Transducin/WD40 repeat-like superfamily protein	-1.27719
AT4G32250	Encodes a component of the TOC machinery that phosphorylates import receptors, supports pre-protein import, and contributes to efficient chloroplast biogenesis.	0.911308
AT4G38760	nucleoporin (DUF3414)	-0.474749
AT5G03070	Putative importin alpha isoform. When overexpressed can rescue the impa-4 decreased transformation susceptibility phenotype.	-0.737578
AT5G05520	Outer membrane OMP85 family protein	-0.702859
AT5G05680	Encodes MOS7 (Modifier of snc1,7), homologous to human and Drosophila melanogaster nucleoporin Nup88. Resides at the nuclear envelope. Modulates the nuclear concentrations of certain defense proteins regulates defense outputs.	-0.692723
AT5G09420	Encodes one of the 36 carboxylate clamp (CC)-tetratricopeptide repeat (TPR) proteins (Prasad 2010, Pubmed ID: 20856808) with potential to interact with Hsp90/Hsp70 as co-chaperones.	-1.07055
AT5G16620	chloroplast protein import (Tic40)	-0.986498
AT5G17020	Encodes a member of the exportin protein family (XPO1A) which functions as receptors for nuclear export. Binds to a variety of proteins having leucine rich export signals.Along with XPO1B involved with development of the male and female gametophytes.	-0.802506
AT5G19320	Encodes RAN GTPase activating protein 2. The protein is localized to the nuclear envelope during interphase.	-0.910396
AT5G19820	Encodes an importin that transports HYL1, a component of the microprocessor, from the cytoplasm to the nucleus to constitute functional microprocessor, thereby affecting miRNA processing. Knockdown amiR mutants significantly reduced nuclear portion of HYL1 protein and correspondingly compromised the pri-miRNA processing in the nucleus.	-1.36528
AT5G20020	A member of RAN GTPase gene family. Encodes a small soluble GTP-binding protein. Likely to be involved in nuclear translocation of proteins. May also be involved in cell cycle progression.	-0.738572
AT5G22640	EMB1211 is a MORN (multiple membrane occupation and recognition nexus) motif containing protein involved in embryo development and chloroplast biogenesis. The mRNA is cell-to-cell mobile.	-1.16936
AT5G28750	Bacterial sec-independent translocation protein mttA/Hcf106	0.474912
AT5G40480	embryo defective 3012	-0.984455
AT5G50460	secE/sec61-gamma protein transport protein	-0.416686
AT5G51200	nuclear pore complex protein (DUF3414)	-0.375151
AT5G53480	ARM repeat superfamily protein	-0.689263
AT5G55190	A member of RAN GTPase gene family. Encodes a small soluble GTP-binding protein. Likely to be involved in nuclear translocation of proteins. May also be involved in cell cycle progression.	-0.397368
AT5G61970	signal recognition particle-related / SRP-like protein	-0.638891
AT5G62050	essential factor for protein sorting and assembly into membranes	-1.02926
AT5G62600	Encodes a nuclear importer of serine-arginine rich (SR) proteins and is involved in the regulation of splicing of R genes by regulating the import of the SR proteins into the nucleus.	-0.80945

## Sheet: RNA processing
Locus identifier	Gene Model Description	log2(larp1+T2/larp1) mRNA levels
AT1G03360	Encodes a core subunit of the RNA exosome required for the processing of rRNA, several snoRNA and the degradation of aberrant transcripts.	-1.17127
AT1G03530	nuclear assembly factor 1	-1.3431
AT1G04510	Encodes MAC3A, a U-box proteins with homology to the yeast and human E3 ubiquitin ligase Prp19. Associated with the MOS4-Associated Complex (MAC). Involved in plant innate immunity.	-1.07298
AT1G06220	Encodes a protein with similarity to splicing factor Snu114. Snu114 is thought to be involved in activation of the splicosome. Loss of GFA1 function results in reduced female fertility. Approximately 50% of ovules abort due to defects in the female gametophyte. In mutant gametophytes antipodal cells express egg cell markers suggesting a defect in specification of cell fate.GFA1 is also required t…	-0.826673
AT1G07170	Similar to human splicing factor 3b, 14 kda subunit, SF3b14b.	0.752228
AT1G09770	Member of MYB3R- and R2R3- type MYB- encoding genes. Essential for plant innate immunity. Interacts with MOS4 and PRL1. The mRNA is cell-to-cell mobile.	-0.447564
AT1G10580	Transducin/WD40 repeat-like superfamily protein	-0.725295
AT1G11400	The PYM gene encodes a protein capable of interacting with MAGO, and Y14, whose orthologs form part of the exon junction complex in animal cells. In vitro binding assays indicate that PYM can bind to MAGO and Y14 either individually, or when they are together. But, MAGO-Y14-PYM ternary complexes are difficult to detect in vivo in Arabidopsis based on pull-down experiments. However there is some e…	0.651863
AT1G11430	Encodes a protein involved in RNA editing in chloroplasts. The mRNA is cell-to-cell mobile.	-1.09988
AT1G14410	Encodes a homolog of the potato p24 protein. Binds single strand telomeric repeats. Negatively regulates telomerase activity and telomere length.	-0.857121
AT1G14650	SWAP (Suppressor-of-White-APricot)/surp domain-containing protein / ubiquitin family protein	-0.576801
AT1G15510	Encodes a pentatricopeptide repeat protein required for chloroplast transcript accD RNA editing and early chloroplast biogenesis.	-1.12732
AT1G16610	Encodes SR45, a member of the highly conserved family of serine/arginine-rich (SR) proteins, which play key roles in pre-mRNA splicing and other aspects of RNA metabolism. SR45 is a spliceosome protein, interacts with SR33 and the U1-70K protein of the U1 snRNP. Also involved in plant sugar response. sr45-1 mutation confers hypersensitivity to glucose during early seedling growth.	-0.929876
AT1G19120	Small nuclear ribonucleoprotein family protein	0.667332
AT1G20220	Alba DNA/RNA-binding protein	-0.934588
AT1G20370	Pseudouridine synthase family protein	-1.01689
AT1G20580	Small nuclear ribonucleoprotein family protein	-0.450919
AT1G20960	Similar to DEAD/DExH box ATP-dependent RNA helicase . Required for proper splicing of FLC. Mutants have reduced FLC levels and are early flowering.	-0.655599
AT1G23860	Encodes a 9G8-like serine-arginine rich (SR) protein that interacts in vivo with U1-70K, a U1 small nuclear ribonucleoprotein 70-kDa protein that is involved in nuclear precursor mRNA processing. Barta et al (2010) have proposed a nomenclature for Serine/Arginine-Rich Protein Splicing Factors (SR proteins): Plant Cell. 2010, 22:2926.	-0.890618
AT1G24706	Encodes a component of the putative Arabidopsis THO/TREX complex: THO1 or HPR1 (At5g09860), THO2 (At1g24706), THO3 or TEX1 (At5g56130), THO5 (At5g42920, At1g45233), THO6 (At2g19430), and THO7 (At5g16790, At3g02950). THO/TREX complexes in animals have been implicated in the transport of mRNA precursors. Mutants of THO3/TEX1, THO1, THO6 accumulate reduced amount of small interfering (si)RNA, sugges…	-0.490175
AT1G27650	U2 auxiliary factor small subunit. The atU2AF35a protein and its homolog, atU2AF35b, contain most of the conserved domains of hsU2AF35, including the psiRRM, one RS domain, two zinc fingers, and the two regions for interacting with U2AF large subunit. Both proteins lack the stretch of glycines present in human U2AF35. The sequences are overall 83% identical, and each Arabidopsis homolog shows app…	-0.481258
AT1G28060	Pre-mRNA-splicing factor 3	-0.6141
AT1G30460	Encodes AtCPSF30, the 30-KDa subunit of cleavage and polyadenylation specificity factor. AtCPSF30 is a probable processing endonuclease. Nucleus-localized RNA binding protein capable of interacting with itself and with calmodulin. Its RNA-binding activity is inhibited by calmodulin in a calcium-dependent fashion.	-0.909849
AT1G32490	Encodes a homolog of the yeast PRP2 protein, one of four related DEAH RNA helicases identified as essential cofactors for RNA splicing.	-0.496962
AT1G52160	Encodes a tRNase Z.	-1.41232
AT1G54380	Encodes GEMIN2, a spliceosomal small nuclear ribonucleoprotein assembly factor conserved from yeast to humans. GEMIN2 is a key component of a posttranscriptional regulatory mechanism that ensures the appropriate acclimation of plants to daily and seasonal changes in temperature conditions. It controls the alternative splicing of several circadian clock genes and attenuates the effects of temperat…	-1.00004
AT1G55150	DEA(D/H)-box RNA helicase family protein	-0.556743
AT1G55310	Encodes a SR spliceosome protein that is localized to nuclear specks, interacts with SR45 and the U1-70K protein of the U1 snRNP, has sequence similar to human SC35 protein. Barta et al (2010) have proposed a nomenclature for Serine/Arginine-Rich Protein Splicing Factors (SR proteins): Plant Cell. 2010, 22:2926.	-0.867772
AT1G55870	Encodes a poly(A)-specific ribonuclease, AtPARN. Expression of AtPARN is upregulated by ABA or stress treatment. Mutant is hypersensitivity to salicylic acid as well as ABA. Functions with AGS1 to regulate the poly(A) status of mitochondrial mRNA.	-1.06521
AT1G56110	NOP56-like protein	-1.44524
AT1G59760	Encodes MTR4, a putative RNA helicase and exosome co-factor. Required for proper rRNA biogenesis and development.	-0.752978
AT1G60080	3-5-exoribonuclease family protein	-1.64609
AT1G60200	RMB25 is an alternative splicing factor involved in mediation of abiotic stress response and ABA response. Its expression is modulated by a variety of stressors and it in turn appears to affect the ratio of splice variants of stress responsive genes such as HAB1.2/HAB1.1.	-0.682516
AT1G70200	Encodes a RNA-Binding Protein RBD1. Promotes chilling tolerance through 23S rRNA processing.	-0.887035
AT1G76010	Alba DNA/RNA-binding protein	-0.97731
AT1G80000	CASC3/Barentsz eIF4AIII binding protein	-0.480727
AT1G80070	Encodes a factor that influences pre-mRNA splicing and is required for embryonic development. Mutations result in an abnormal suspensor and embryo lethality. The mRNA is cell-to-cell mobile.	-0.698997
AT2G02740	Encodes a homolog of the potato p24 protein. It shares the conserved KGKAAL domain, a putative DNA-binding domain, with potato p24 and is localized to the plastid and not the nucleus.	-0.7933
AT2G18510	RNA-binding (RRM/RBD/RNP motifs) family protein	-0.597761
AT2G20020	Promotes the splicing of chloroplast group II introns. Splices clpP-1 and ropC1 introns.	-0.572363
AT2G22400	TRM4B is a cytosine-5--methyltransferase. Mutants have decreased methyl cytosine and defects in root development.	-0.85061
AT2G25580	Tetratricopeptide repeat (TPR)-like superfamily protein	-1.0115
AT2G29580	Encodes MAC5B, homologous to MAC5A. MAC5A is a component of the MOS4-associated complex (MAC) that contributes to snc1- mediated autoimmunity. Homologues include AT1G07360 (MAC5A), AT2G29580 (MAC5B) and AT5G07060 (MAC5C).	-0.789499
AT2G29760	Encodes a chloroplast RNA editing factor.	-0.957468
AT2G32230	Encodes a protein-only RNase P that is involved in the 5? cleavage of the precursor tRNAs and is able to cleave tRNA-like structures involved in the maturation of plant mitochondrial mRNAs. Mutants show a drastic reduction in the levels of mature plastid tRNA-Phe(GAA) and tRNA-Arg(ACG), limiting plastid gene expression.	-0.377367
AT2G33730	Homolog of the DEADbox pre-mRNA splicing factor Prp28 which regulates abundance of miRNA. It plays essential roles in miRNA biogenesis and interacts with the DCL1 complex and positively influences pri-miRNA processing. SMA1 binds the promoter region of genes encoding pri-miRNAs (MIRs) and is required for MIR transcription. It enhances the abundance of the DCL1 protein levels through promoting the…	-0.572191
AT2G36480	pre-mRNA cleavage complex 2 Pcf11-like protein	-0.451827
AT2G38770	P-loop containing nucleoside triphosphate hydrolases superfamily protein	-0.781145
AT2G41500	Encodes LACHESIS (LIS), a protein with seven WD40 repeats. LIS is homologous to the yeast splicing factor PRP4 which is associated with the U4/U6 complex of the spliceosome. LIS is involved in a mechanism that prevents accessory cells from adopting gametic cell fate: lis mutant forms supernumerary egg cells.	-0.579027
AT2G45730	eukaryotic initiation factor 3 gamma subunit family protein	-0.65834
AT2G47420	Encodes a putative rRNA dimethyltransferase.	-0.948879
AT2G48080	oxidoreductase, 2OG-Fe(II) oxygenase family protein	-1.41088
AT3G02320	N2,N2-dimethylguanosine tRNA methyltransferase	-1.17471
AT3G03710	Encodes a chloroplast polynucleotide phosphorylase (PNPase). Involved in response to phosphorus (P) starvation. Mutants impaired in the expression of this gene have been selected through their resistance to fosmidomycin, a strong inhibitor of DXR, an enzyme of the methylerythritol-dependent IPP biosynthesis pathway. The pathway enzymes were upregulated in the mutant seedlings.	-0.778816
AT3G04680	Encodes a nuclear protein that functions in mRNA processing. Mutations in this gene cause embryo lethality and reduced transmission through the female gametophyte. Over-expression of a CLPS3:TAP protein changes the relative levels of two alternatively processed FCA transcripts. It also causes abnormal phyllotaxy and flower development, early flowering under long and short days, and increased leve…	-0.641363
AT3G04820	Pseudouridine synthase family protein	-0.890957
AT3G05060	SAR DNA-binding protein, putative, strong similarity to SAR DNA-binding protein-1 (Pisum sativum) GI:3132696; contains Pfam profile PF01798: Putative snoRNA binding domain; encodes NOP58-like protein	-1.42221
AT3G12860	NOP56-like pre RNA processing ribonucleoprotein	-1.07604
AT3G13300	Encodes VCS (VARICOSE). Involved in mRNA decapping. VCS forms a mRNA decapping complex with DCP1 (At1g08370) and DCP2 (At5g13570). Unlike DCP2, VCS itself does not have mRNA decapping activity in vitro. DCP1, DCP2 and VCS colocalize in cytoplasmic loci, which are putative Arabidopsis mRNA processing bodies. Null mutants of DCP1, DCP2, and VCS accumulate capped mRNAs with a reduced degradation rat…	-0.680146
AT3G13570	encodes an SC35-like splicing factor of 30 kD that is localized to the nuclear specks. Barta et al (2010) have proposed a nomenclature for Serine/Arginine-Rich Protein Splicing Factors (SR proteins): Plant Cell. 2010, 22:2926.	-0.570473
AT3G15000	Encodes RIP1 (RNA-editing factor interacting protein 1). Involved in chloroplast and mitochondrial RNA editing. The mRNA is cell-to-cell mobile.	-0.65226
AT3G16810	Encodes a member of the Arabidopsis Pumilio (APUM) proteins containing PUF domain (eight repeats of approximately 36 amino acids each). PUF proteins regulate both mRNA stability and translation through sequence-specific binding to the 3' UTR of target mRNA transcripts.	-1.28219
AT3G18165	Encodes MOS4 (Modifier of snc1, 4), a nuclear protein homologous to human Breast Cancer-Amplified Sequence (BCAS2). MOS4 interacts with AtCDC5 and PRL1. All three proteins are essential for plant innate immunity.	-1.06596
AT3G19440	Pseudouridine synthase family protein	-1.09831
AT3G19760	Encodes an RNA helicase that may be a component of the Exon Junction Complex. Subcellular localization is modulated by stress. Under normal conditions it is localized to the nuceloplasm but under hyopoxic conditions it localizes to the nucleolus and splicing speckles.	-0.582589
AT3G19840	Binds the carboxyl-terminal domain (CTD) of the largest subunit of RNA polymerase II and functions as a scaffold for RNA processing machineries.	-0.63449
AT3G22150	Involved in RNA editing of plastid atpF and mitochondrial nad5.	-0.637975
AT3G22310	Sequence similarity ot DEAD-box RNA helicases. Binds RNA and DNA. Involved in drought, salt and cold stress responses. The mRNA is cell-to-cell mobile.	-1.10353
AT3G22330	DEAD-box protein required for efficient group II intron splicing in mitochondria.	-1.06726
AT3G26410	Encodes a protein involved in modification of nucleosides in tRNA. Mutants have only 7.3% 2-methylguanosine levels of wild type counterparts.	-1.09412
AT3G26780	Encodes MEF14 (mitochondrial editing factor 14), a PPR (pentatricopeptide repeat proteins) protein required for RNA editing at site matR-1895 in mitochondria. The mRNA is cell-to-cell mobile.	-0.419485
AT3G46210	Ribosomal protein S5 domain 2-like superfamily protein	-0.844989
AT3G49430	Barta et al (2010) have proposed a nomenclature for Serine/Arginine-Rich Protein Splicing Factors (SR proteins): Plant Cell. 2010, 22:2926.	-0.639886
AT3G50670	Encodes U1 snRNP 70K	-0.628752
AT3G53110	Encodes a putative DEAD-Box RNA Helicase and has RNA-dependent ATPase activity. Mutant is Sensitive to chilling stress and heat stress. Germination of the mutant is inhibited by ABA. LOS4 may be involved in temperature sensing. Is enriched in the nuclear envelope and also located in the cytoplasm. LOS4 is involved in export of poly A RNA. The mRNA is cell-to-cell mobile.	-0.614827
AT3G55160	THADA is an orphan gene in Arabidopsis thaliana. It is the only DUF2428 domain containing protein in the genome.	-0.899687
AT3G55200	Encodes a spliceosomal protein that is required for proper reproduction. RNAi lines display low pollen viability,caused by a defect in the transition from microspore to bicellular stage during pollen development.	-0.836217
AT3G55220	Encodes a spliceosomal protein that is required for proper reproduction. RNAi lines display low pollen viability,caused by a defect in the transition from microspore to bicellular stage during pollen development.	-0.7117
AT3G57150	Encodes a putative pseudouridine synthase (NAP57).	-1.65969
AT3G58560	Encodes a protein that is involved in mRNA processing and localized to cytoplasmic p-bodies. Double mutants with CCR4b show decreased sensitivity to high concentrations of sucrose. Involved in starch and sucrose metabolism.	-0.392115
AT3G58580	Encodes a protein that is involved in mRNA processing and localized to cytoplasmic p-bodies. Double mutants with CCR4a show decreased sensitivity to high concentrations of sucrose. Involved in starch and sucrose metabolism.	-0.431598
AT3G60500	Encodes a 3'-5' exoribonuclease, positively regulates CER3 transcription, involved in cuticular wax biosynthesis.	-0.826491
AT3G61620	exonuclease RRP41 (RRP41)	-0.865767
AT4G01037	Ubiquitin carboxyl-terminal hydrolase family protein	-0.694093
AT4G01860	Transducin family protein / WD-40 repeat family protein	-0.990568
AT4G02990	Encodes BELAYA SMERT (BSM), a plastid-localized protein homologous to mitochondrial transcription termination factors (mTERF) found in animal. Mutant bsm cells are albino, are compromised in growth, and suffer defects in global plastidic gene expression. The mRNA is cell-to-cell mobile.	-0.461991
AT4G09980	Encodes a member of a core set of mRNA m6A writer proteins and is required for N6-adenosine methylation of mRNA.	-1.05436
AT4G10760	Encodes a member of a core set of mRNA m6A writer proteins and is required for N6-adenosine methylation of mRNA.	-0.530396
AT4G12600	Ribosomal protein L7Ae/L30e/S12e/Gadd45 family protein	-0.887836
AT4G14510	Encodes a CRM domain protein CFM3b. Homolog of CFM3a (AT3G23070). CFM3a is shown to function in the splicing of group IIB introns in chloroplasts.	-1.11633
AT4G20440	small nuclear ribonucleoprotein associated protein B	-1.17103
AT4G21900	Encodes a proteinaceous RNase P that supports RNase P activity in vivo in both organelles and the nucleus. It is also involved in the maturation of small nucleolar RNA (snoRNA) and mRNA.	-0.935646
AT4G22285	Ubiquitin C-terminal hydrolases superfamily protein	-0.874929
AT4G22720	Actin-like ATPase superfamily protein	-0.872812
AT4G25630	encodes a fibrillarin, a key nucleolar protein in eukaryotes which associates with box C/D small nucleolar RNAs (snoRNAs) directing 2'-O-ribose methylation of the rRNA. This gene also encodes a novel box C/D snoRNA, U60.2f in its fifth intron that accumulates in seedlings and that their targeted residue on the 25 S rRNA is methylated. The mRNA is cell-to-cell mobile.	-2.051
AT4G29830	VIP3 protein is composed of repeats of WD motif which is involved in protein complex formation. The gene is involved in flower timing and flower development. This gene is predicted to encode a protein with a DWD motif. It can bind to DDB1a in Y2H assays, and DDB1b in co-IP assays, and may be involved in the formation of a CUL4-based E3 ubiquitin ligase. Loss of gene function leads to a redistribu…	-1.01666
AT4G31580	Encodes a Serine/arginine-rich (SR) protein RSZp22. SR proteins are splicing regulators that share a modular structure consisting of one or two N-terminal RNA recognition motif domains and a C-terminal RS-rich domain. RSZp22 is located in the nucleolus. It is a nucleocytoplasmic shuttling protein and an interacting partner to the Arabidopsis U1-70K. Barta et al (2010) have proposed a nomenclature…	-0.679398
AT4G37010	Encodes a member of the Centrin family. Mutants are hypersensitive to UV and prone to UV induced DNA damage. Based on sequence similarity and mutant phenotype CEN2 is thought to be involved in nucelotide excision repair/DNA repair.	1.09257
AT4G38890	FMN-linked oxidoreductases superfamily protein	-0.508844
AT4G39680	SAP domain-containing protein	-0.517196
AT5G01400	Encodes a Symplekin/Pta1 homologue which would have the potential to interact with either ESP1 or AtCstF64.	-0.613655
AT5G06160	Encodes a protein with similarity to pre-mRNA splicing factor SF3a60 that is involved in gametic cell fate determination. Loss of function results in the ectopic expression of egg cell makers suggesting a role in restriction of gametic cell fate. Expressed strongly in gametophytes and weakly in sporophytes.	-0.584998
AT5G07350	RNA binding protein with nuclease activity essential for stress response. Involved in mechanisms acting on mRNAs entering the secretory pathway. Functionally redundant with TSN2.	-0.967807
AT5G08180	Ribosomal protein L7Ae/L30e/S12e/Gadd45 family protein	-0.680983
AT5G11170	One of two genes encoding an ATP-dependent RNA helicase that localizes predominantly to euchromatic regions of Arabidopsis nuclei, and associates with genes transcribed by RNA polymerase II independently from the presence of introns. It is not detected at non-transcribed loci. It interacts with ssRNA, dsRNA and dsDNA, but not with ssDNA. Its ATPase activity is stimulated by RNA and dsDNA and its …	-0.470213
AT5G11200	One of two genes encoding an ATP-dependent RNA helicase that localizes predominantly to euchromatic regions of Arabidopsis nuclei, and associates with genes transcribed by RNA polymerase II independently from the presence of introns. It is not detected at non-transcribed loci. It interacts with ssRNA, dsRNA and dsDNA, but not with ssDNA. Its ATPase activity is stimulated by RNA and dsDNA and its …	-0.5986
AT5G13570	Encodes DCP2 with mRNA decapping activity. DCP2 forms a mRNA decapping complex with DCP1 (At1g08370) and VCS (VARICOSE) (At3g13300). Recombinant DCP2 is enzymatically active in vitro, generating from capped mRNAs m7GDP, and 5?-phosphorylated mRNAs. DCP1, DCP2 and VCS colocalize in cytoplasmic loci, which are putative Arabidopsis mRNA processing bodies. Null mutants of DCP1, DCP2, and VCS accumula…	0.774841
AT5G14580	polyribonucleotide nucleotidyltransferase	-1.15332
AT5G15810	tRNA (guanine(26)-N(2))-dimethyltransferase	-1.20955
AT5G16180	Promotes the splicing of chloroplast group II introns. Splices atpF introns.	0.628574
AT5G20160	Ribosomal protein L7Ae/L30e/S12e/Gadd45 family protein	-1.09907
AT5G23880	Encodes a protein similar to the 100kD subunit of cleavage and polyadenylation specificity factor (CPSF), the factor responsible for the recognition of the AAUAAA motif during mRNA polyadenylation. The protein interacts with a portion of a nuclear poly(A) polymerase. It is likely to be a part of the mRNA 3'end formation apparatus.	-0.546757
AT5G24840	tRNA (guanine-N-7) methyltransferase	-1.03975
AT5G25060	RNA recognition motif (RRM)-containing protein	-0.351482
AT5G26742	DEAD box RNA helicase (RH3)	-1.21486
AT5G27120	SAR DNA-binding protein, putative, strong similarity to SAR DNA-binding protein-1 (Pisum sativum) GI:3132696; contains Pfam profile PF01798: Putative snoRNA binding domain; has similarity to MAR binding NOP58 protein The mRNA is cell-to-cell mobile.	-1.57196
AT5G28740	Tetratricopeptide repeat (TPR)-like superfamily protein	-0.925493
AT5G35910	Encodes a nuclear-localized RRP6-like protein whose mutation leads to accumulation of an rRNA maturation by-product.	-0.562429
AT5G41770	crooked neck protein, putative / cell cycle protein	-0.547106
AT5G44500	Small nuclear ribonucleoprotein family protein	-0.836939
AT5G47680	Encodes a protein involved in modification of nucleosides in tRNA. Mutants have 50% less 1-methylguanosine than wt counterparts.	-0.453403
AT5G47970	Aldolase-type TIM barrel family protein	-0.638154
AT5G51300	Encodes a nuclear localized splicing factor homolog that is involved in alternative splicing of some mRNAs.	-0.682587
AT5G52470	Encodes a fibrillarin, a key nucleolar protein in eukaryotes which associates with box C/D small nucleolar RNAs (snoRNAs) directing 2'-O-ribose methylation of the rRNA. This gene also encodes a novel box C/D snoRNA, U60.1f in its fifth intron that accumulates in seedlings and that their targeted residue on the 25 S rRNA is methylated.	-0.909081
AT5G54890	RNA-binding CRS1 / YhbY (CRM) domain-containing protein	1.02818
AT5G55130	putative molybdopterin synthase sulphurylase (cnx5)	-0.675736
AT5G55670	RNA-binding (RRM/RBD/RNP motifs) family protein	-0.393707
AT5G57280	Gene encodes a methyltransferase-like protein involved in pre-rRNA processing.	-1.46559
AT5G57370	U4/U6.U5 small nuclear ribonucleoprotein	-1.21264
AT5G58040	Encodes a subunit of the polyadenylation apparatus that interacts with and stimulates the activity of poly(A) polymerase. Additionally , it interacts with several polyadenylation factor subunits and is an RNA-binding protein. It is suggested that this protein coordinates a number of polyadenylation factor subunits with PAP and with RNA. The mRNA is cell-to-cell mobile.	-0.519362
AT5G60590	DHBP synthase RibB-like alpha/beta domain-containing protein	-1.11304
AT5G61030	Encodes a glycine-rich RNA binding protein that is involved in C-> U RNA editing in mitochondria. Gene expression is induced by cold. The mRNA is cell-to-cell mobile.	-0.789569
AT5G61780	Involved in the regulation of AtGA20ox3 expression, as well as seed germination. The mRNA is cell-to-cell mobile.	-1.04225
AT5G63120	P-loop containing nucleoside triphosphate hydrolases superfamily protein	-0.755399
AT5G63420	Encodes a member of the metallo-beta-lactamase protein family that plays a vital role in embryo morphogenesis and apical-basal pattern formation by regulating chloroplast development. In bacteria, RNase J plays an important role in rRNA maturation and in the 5&#8242; stability of mRNA.	-0.70833
AT5G64270	splicing factor	-0.35994
ATMG00520	Intron maturase, type II family protein	-0.707859

## Sheet: HSP chaperones
Locus identifier	Gene Model Description	log2(larp1+T2/larp1) mRNA levels
AT1G11660	heat shock protein 70 (Hsp 70) family protein	-0.576057
AT1G16670	Encodes a cold-activated plasma membrane protein cold-responsive protein kinase that phosphorylates 14-3-3 proteins. The phosphorylated 14-3-3 proteins shuttle from the cytosol to the nucleus, where they interact with and destabilize the key cold-responsive C-repeat-binding factor (CBF) proteins, modulate CBF stability and the response to cold stress.	0.76628
AT1G55490	encodes the beta subunit of the chloroplast chaperonin 60, a homologue of bacterial GroEL. Mutants in this gene develops lesions on its leaves, expresses systemic acquired resistance (SAR) and develops accelerated cell death to heat shock stress. The protein has molecular chaperone activity for suppressing protein aggregation in vitro.	-0.902665
AT1G61770	J domain protein. The mRNA is cell-to-cell mobile.	-0.559709
AT1G79920	Heat shock protein 70 (Hsp 70) family protein	-1.10102
AT1G79930	encodes high molecular weight heat shock protein 70 not a HSP90 homolog, mRNA is constitutively expressed but transiently induced after heat shock	-1.58445
AT2G04030	Encodes a chloroplast-targeted 90-kDa heat shock protein located in the stroma involved in red-light mediated deetiolation response and crucial for protein import into the chloroplast stroma. Mutants are resistant to chlorate, have elongated hypocotyls in light, and affect the expression of NR2, CAB, and RBCS but NOT NR1 and NiR.	-0.677363
AT2G17870	Encodes COLD SHOCK DOMAIN PROTEIN 3 (CSP3), involved in the acquisition of freezing tolerance.	-0.732251
AT2G18790	Red/far-red photoreceptor involved in the regulation of de-etiolation. Exists in two inter-convertible forms: Pr and Pfr (active). Involved in the light-promotion of seed germination and in the shade avoidance response. Promotes seedling etiolation in both the presence and absence of phytochrome A. Overexpression results in etiolation under far-red light. Accumulates in the nucleus after exposure…	-0.692287
AT2G19310	HSP20-like chaperones superfamily protein	1.27025
AT2G28000	Encodes chaperonin-60 alpha, a molecular chaperone involved in Rubisco folding. Mutants display aberrant chloroplast and embryo development. The mRNA is cell-to-cell mobile.	-0.928335
AT2G33210	Involved in the RNA splicing of rpl2 and ccmFC introns in mitochondria.	-0.956898
AT3G07770	HEAT SHOCK PROTEIN 89.1	-0.700714
AT3G13470	Encodes a subunit of chloroplasts chaperonins that are involved in mediating the folding of newly synthesized, translocated, or stress-denatured proteins. Cpn60 subunits are: Cpn60alpha1 (At2g28000), AtCpn60alpha2 (At5g18820), AtCpn60beta1 (At1g55490), AtCpn60beta2 (At3g13470), AtCpn60beta3 (At5g56500), AtCpn60beta4 (At1g26230).	-1.11461
AT3G13860	heat shock protein 60-3A	-0.796545
AT3G23990	mitochondrial chaperonin HSP. assist in rapid assembly of the oligomeric protein structures in the mitochondria.	-1.06733
AT3G48870	Encodes a nuclear encoded protein with similarity to Clpa regulatory subunit of CLP protease complex. The protein is localized to the chloroplast stroma. May function redundantly with TIC complex in chloroplast protein import.	-0.553627
AT3G62600	J domain protein localized in ER lumen. Can partially compensate for the growth defect in jem1 scj1 mutant yeast. Forms a complex SDF2-ERdj3B-BiP that is required for the proper accumulation of the surface-exposed leucine-rich repeat receptor kinases EFR. EFR is involved in PAMP (pathogen associated molecular patterns) triggered immunity.	-0.835274
AT4G16660	heat shock protein 70 (Hsp 70) family protein	-1.23783
AT4G24190	encodes an ortholog of GRP94, an ER-resident HSP90-like protein and is involved in regulation of meristem size and organization. Single and double mutant analyses suggest that SHD may be required for the correct folding and/or complex formation of CLV proteins. Lines carrying recessive mutations in this locus exhibits expanded shoot meristems, disorganized root meristems, and defective pollen tub…	-0.613935
AT4G24280	Involved in protein import into chloroplasts during early developmental stages. The mRNA is cell-to-cell mobile.	-0.717644
AT4G36020	Encodes a cold shock domain protein. Involved in cold acclimation by blocking the secondary structure of mRNA which in turn facilitates translation at cold temperature.	-1.06027
AT4G37910	mitochondrial heat shock protein 70-1	-0.941646
AT4G38680	Encodes a glycine-rich protein that binds nucleic acids and promotes DNA melting. Its transcript and protein levels are up-regulated in response to cold treatment with protein levels peaking earlier in shoots (~10-14 days) than in roots (~21 days). It is normally expressed in meristematic regions and developing tissues where cell division occurs. RNAi and antisense lines with lower levels of CSP2…	-1.4907
AT5G02500	encodes a member of heat shock protein 70 family.	-1.59246
AT5G18820	Encodes a subunit of chloroplasts chaperonins that are involved in mediating the folding of newly synthesized, translocated, or stress-denatured proteins. Cpn60 subunits are: Cpn60alpha1 (At2g28000), AtCpn60alpha2 (At5g18820), AtCpn60beta1 (At1g55490), AtCpn60beta2 (At3g13470), AtCpn60beta3 (At5g56500), AtCpn60beta4 (At1g26230).	-0.869176
AT5G20720	Encodes a chloroplast co-chaperonin with similarity to CPN21 from spinach, E.coli GroES.	-0.280127
AT5G28540	Encodes the luminal binding protein BiP, an ER-localized member of the HSP70 family. BiP is composed of an N-terminal ATP binding domain and a C-terminal domain that binds to hydrophobic patches on improperly/incompletely folded proteins in an ATP-dependent manner. Involved in polar nuclei fusion during proliferation of endosperm nuclei.	-1.23929
AT5G42020	Luminal binding protein (BiP2) involved in polar nuclei fusion during proliferation of endosperm nuclei.	-1.61419
AT5G49910	Stromal heat shock protein involved in protein import into chloroplast. The mRNA is cell-to-cell mobile.	-0.941907
AT5G51070	ATP-dependent Clp protease regulatory subunit The mRNA is cell-to-cell mobile.	0.758101
AT5G56000	HEAT SHOCK PROTEIN 81.4	-1.36313
AT5G56010	A member of heat shock protein 90 (HSP90) gene family. Expressed in all tissues and abundant in root apical meristem, pollen and tapetum. Expression is NOT heat-induced but induced by IAA and NaCl. Overexpression reduced tolerance to heat and conferred higher tolerance to calcium. The mRNA is cell-to-cell mobile.	-1.00806
AT5G56030	A member of heat shock protein 90 (HSP90) gene family. Expressed in all tissues and abundant in root apical meristem, pollen and tapetum. Expression is NOT heat-induced but induced by IAA and NaCl. Interacts with HsfA1d in the cytosol and the nucleus and negatively regulates HsfA1d. Did not bind to AtHsfA4c. The mRNA is cell-to-cell mobile.	-1.09054

## Sheet: Cell cycle
Locus identifier	Gene Model Description	log2(larp1+T2/larp1) mRNA levels
AT1G07370	Encodes putative proliferating cell nuclear antigen involved in cell cycle regulation. May be sumoylated.	-0.937075
AT1G08260	Similar to POL2A, DNA polymerase epsilon catalytic subunit. Essential for Arabidopsis growth. Null homozygotes are embryo lethal, partial loss of function alleles show embryo patterning defects such as root pole displacement. Delayed progression through cell cycle results in embryos with smaller numbers of larger cells.	-0.597593
AT1G08840	Encodes a homolog of human and yeast DNA2. Mutants have increased sensitivity to DNA damage stress.	-0.959648
AT1G44900	Encodes MCM2 (MINICHROMOSOME MAINTENANCE 2), a protein essential to embryo development. Overexpression results in altered root meristem function.	-0.825065
AT1G67630	DNA polymerase alpha 2	-0.63245
AT2G07690	Member of the minichromosome maintenance complex, involved in DNA replication initiation. Abundant in proliferating and endocycling tissues. Localized in the nucleus during G1, S and G2 phases of the cell cycle, and are released into the cytoplasmic compartment during mitosis. Binds chromatin.	-0.6051
AT2G16440	Regulates DNA replication via interaction with BICE1 and MCM7.	-0.992839
AT2G20980	Similar to MCM10, which in other organism was shown to be involved in the initiation of DNA replication.	-0.976426
AT2G27470	nuclear factor Y, subunit B11	-1.72001
AT2G31270	Encodes a cyclin-dependent protein kinase. Involved in nuclear DNA replication and plastid division. Located in nucleus and chloroplast.	-0.919269
AT3G23890	Encodes a topoisomerase II that is highly expressed in young seedlings. The protein is localized in the nucleus and gene expression levels are increased in proliferative tissues.	-0.464782
AT4G02060	Member of the minichromosome maintenance complex, involved in DNA replication initiation. Abundant in proliferating and endocycling tissues. Localized in the nucleus during G1, S and G2 phases of the cell cycle, and are released into the cytoplasmic compartment during mitosis. Binds chromatin.	-0.830926
AT5G22010	Encodes RFC1, the largest subunit of replication factor C. Mediates genomic stability and transcriptional gene silencing.	-0.591838
AT5G44635	minichromosome maintenance (MCM2/3/5) family protein	-0.774958
AT5G46280	Minichromosome maintenance (MCM2/3/5) family protein	-0.947787
AT5G67100	Encodes the putative catalytic subunit of the DNA polymerase alpha. Interacts with genes involved in chromatin-mediated cellular memory. ICU2 genetically interacts with TERMINAL FLOWER2, the ortholog of HETEROCHROMATIN PROTEIN1 of animals and yeasts, and with the Polycomb group (PcG) gene CURLY LEAF. A number of regulatory genes were derepressed in the icu2-1 mutant, including genes associated wi…	-0.698687

[truncated: 2 more sheets: Protein biosynthesis, Cell wall]
