# Supplementary material for: Parallel global profiling of plant TOR dynamics reveals a conserved role for LARP1 in translation
Source: eLife. 2020 Oct 15;9:e58795. doi: 10.7554/eLife.58795 (PMC7584452; doi:10.7554/eLife.58795)
Supplement: Supplementary file 9. — Table presents the fold-change in translation efficiency levels of the genes from the different categories, as determined by Mapman analysis. These data are represented as a box-whisker plot in Figure 4E. [file elife-58795-supp9.xlsx]

## Sheet: Cytosolic ribosome
Locus identifier	Gene Model Description	log2(larp1+T2/larp1) translation efficiency
AT1G04480	Ribosomal protein L14p/L23e family protein	-0.609359
AT1G08410	Encodes a large 60S subunit nuclear export GTPase 1 that is required for 40S maturation and is involved in ribosome biogenesis and affects multiple auxin-regulated development processes.	0.680243
AT1G15930	Ribosomal protein L7Ae/L30e/S12e/Gadd45 family protein	-0.685267
AT1G26880	Ribosomal protein L34e superfamily protein	-0.605922
AT1G56045	Ribosomal protein L41 family	-1.30339
AT1G63980	D111/G-patch domain-containing protein	-0.783682
AT1G67120	Represents a homolog of the yeast MDN gene, which encodes a non-ribosomal protein involved in the maturation and assembly of the 60S ribosomal subunit. In Arabidopsis, it is essential for female gametogenesis progression.	0.952171
AT1G72440	Encodes SLOW WALKER2 (SWA2), a NOC1/Mak21 homologue. Essential for coordinated cell cycle progression during female gametophyte development.	0.600904
AT1G74270	Ribosomal protein L35Ae family protein	-0.634716
AT1G77940	Ribosomal protein L7Ae/L30e/S12e/Gadd45 family protein	-0.731511
AT2G18020	Ribosomal protein L2 family	0.616671
AT2G19740	Ribosomal protein L31e family protein	-0.797371
AT2G25210	Ribosomal protein L39 family protein	-1
AT2G27720	60S acidic ribosomal protein family	-0.58356
AT2G32220	Ribosomal L27e protein family	-0.926937
AT2G43460	Ribosomal L38e protein family	-0.824742
AT3G02190	Ribosomal protein L39 family protein	-0.787779
AT3G04400	Ribosomal protein L14p/L23e family protein	-0.696808
AT3G06530	ARM repeat superfamily protein	0.667425
AT3G10090	Nucleic acid-binding, OB-fold-like protein	-0.631074
AT3G11964	Encodes a nucleolar protein that is a ribosome biogenesis co-factor. Mutants display aberrant RNA processing and female gametophyte development.	0.863498
AT3G13230	RNA-binding KH domain-containing protein	-0.641106
AT3G18740	The gene encodes a putative leucine-rich repeat (LRR)Receptor-like kinase (RLK).	-0.583706
AT3G21540	transducin family protein / WD-40 repeat family protein	0.666956
AT3G44010	Ribosomal protein S14p/S29e family protein	-0.721699
AT3G56020	Ribosomal protein L41 family	-1.39361
AT3G59540	Ribosomal L38e protein family	-0.943277
AT4G26230	Ribosomal protein L31e family protein	-0.580624
AT4G31985	Ribosomal protein L39 family protein	-0.709221
AT4G33865	Ribosomal protein S14p/S29e family protein	-0.862947
AT5G02450	Ribosomal protein L36e family protein	-0.64027
AT5G02610	Ribosomal L29 family protein	-0.598935
AT5G27700	Cytosolic ribosomal protein. Similar to EVR1 and redundant with EVR1. Also enhances VAR2 mutant varigation, but to a lesser extent than evr1.	-0.594924
AT5G56670	Ribosomal protein S30 family protein	-0.784876
AT5G56710	Ribosomal protein L31e family protein	-0.609685
AT5G64140	Encodes a putative ribosomal protein S28.	-0.651623
