# Supplementary material for: Parallel global profiling of plant TOR dynamics reveals a conserved role for LARP1 in translation
Source: eLife. 2020 Oct 15;9:e58795. doi: 10.7554/eLife.58795 (PMC7584452; doi:10.7554/eLife.58795)
Supplement: Supplementary file 10. — Table presents strong candidate 5′TOP mRNAs in Arabidopsis, showing their TOPscores and fold-changes in translation efficiency in response to Torin2 in WT and larp1 seedlings. [file elife-58795-supp10.xlsx]

## Sheet: Sheet1
Locus	Gene name	Gene Symbol	Gene function	TOPscore	WT	larp1
AT5G05820	UDP-uronic acid transporter 3	UUAT3	Cell wall composition	3.5546	-1.09516	0.128188
AT4G02130	Galacturonosyltransferase-like 6	GATL6	Cell wall composition	7.61111	-0.731511	-0.0331669
AT3G23980	Blister / Kold sensitiv 1	BLI	Chromatin structure	2.40365	-0.812373	0.146841
AT5G66750	Decrease in DNA methylation 1	DDM1	Chromatin structure	2.53394	-0.678072	0.13245
AT1G57820	Variant in methylation 1	VIM1	Chromatin structure	2.60737	-0.590609	0.188662
AT3G12380	Actin-related protein 5	ARP5	Chromatin structure	3.10134	-0.779874	0.575115
AT4G26110	Nucleosome assembly protein 1;1	NAP1;1	Chromatin structure	3.69879	-1.0614	-0.147845
AT3G51880	HMG domain-containing B1	HMGB1	Chromatin structure	3.93101	-0.714843	0.0496308
AT5G22650	Histone deacetylase 2B	HD2B	Chromatin structure	4.07874	-0.601836	0.156869
AT3G28730	HMG domain-containing subunit of FACT histone chaperone	SSRP1	Chromatin structure	4.87701	-0.756074	0.376969
AT1G01750	Actin depolymerizing factor 11	ADF11	Cytoskeleton	2.59	-1.25	-0.31
AT4G25740	eS10a	eS10a	Cytosolic ribosome	2.4559	-0.672425	0.0435893
AT4G34670	eS1b	eS1b	Cytosolic ribosome	2.64	-0.880853	-0.115477
AT5G58930	Octopus-like 4	OPL4	Development	3.24821	-0.703607	0.390459
AT2G22490	Cyclin D2;1	CycD2;1	D-type cyclin	2.76635	-1.43741	0.169925
AT5G67260	Cyclin D3;2	CycD3;2	D-type cyclin	8.26598	-1.06413	-0.188762
AT5G42940	E3 ubiquitin-protein ligase RHG1A	RHG1A	E3 ubiquitin-protein ligase	3.45831	-0.671946	-0.0730635
AT5G60580	E3 ubiquitin-protein ligase MUF9.21	MUF9.21	E3 ubiquitin-protein ligase	4.1813	-0.605282	0.109229
AT3G16640	Translationally-controlled tumor protein 1	TCTP1	Growth	3.17437	-2.18903	-0.63743
AT3G05120	GA-insensitive dwarf 1A	GID1A	Hormone signaling	2.65523	-0.665999	0.190103
AT5G12050	Big grain 1	BG1	Hormone signaling (auxin)	2.84749	-0.750324	-0.0155409
AT5G57090	Putative auxin efflux carrier PIN2	PIN2	Hormone signaling (auxin)	4.36078	-0.592122	0.00625899
AT3G16500	Aux/IAA 26	IAA26	Hormone signaling (auxin)	5.52	-0.93	0.33
AT1G33700	Glucosylceramidase GBA2-like	GBA2L	Lipid homeostasis	3.21087	-0.607261	0.417085
AT1G53030	COX17-like	COX17L	Mitochondrial OXPHOS	3.64195	-1.0651	-0.16601
AT3G22300	Mitochondrial ribosomal protein uS10m	uS10m	Mitochondrial ribosome	2.58	-0.73	0.32
AT5G56940	bS16m	bS16m	Mitochondrial ribosome	3.2412	-0.954912	0.0246621
AT3G17465	uL3m	uL3m	Mitochondrial ribosome	3.57401	-0.816037	-0.0853915
AT3G21160	Golgi-α-mannosidase I protein 2	MNS2	N-linked glycosylation	4.54337	-0.842459	-0.00812788
AT3G08947	Importin β	IMB1	Nuclear import	3.01515	-0.758992	0.227601
AT4G25910	NFU3	NFU3	Plastid Fe-S cluster assembly	2.56926	-1.34104	0.478834
AT5G24260	Prolyl endopeptidase-like	PREPL	Protease	2.34469	-0.66015	-0.0116818
AT4G16660	Heat shock protein 70	HSP70	Protein chaperone	3.2162	-0.590016	0.102098
AT5G16070	Chaperonin containing TCP1 complex subunit 6B	CCT6B	Protein chaperone	3.38	-0.72	0.35
AT1G69220	Hippo-like salt-inducible kinase 1	SIK1	Protein kinase (MEK4/Hippo-like)	6	-1	0.467779
AT3G23000	CBL-interacting protein kinase 7	CIPK7	Protein kinase (SnRK3)	3.06002	-0.604071	0.321928
AT4G28450	WD-repeat and SOF1-domain containing protein 1-like	WDSOF1L	Ribosome biogenesis	2.81892	-0.611804	0.0262315
AT3G57150	Pseudouridine synthase Nap57	NAP57	Ribosome biogenesis	3.12546	-1.01707	0.398549
AT5G43720	EFG1 domain-containing protein	EFG1L	Ribosome biogenesis	3.24209	-0.629817	0.270648
AT5G14610	RNA helicase 46	RH46	Ribosome biogenesis	3.53846	-0.622437	0.635844
AT1G30590	RNA Pol I-specific transcription initiation factor RRN3	RRN3	Ribosome biogenesis	3.78815	-1.18903	-0.342106
AT2G47990	Slow Walker 1	SWA1	Ribosome biogenesis	4.17	-0.59	0.28
AT5G20600	Ribosomal RNA processing protein 1-like	RRP1L	Ribosome biogenesis	4.23782	-0.803603	-0.205469
AT3G22660	EBP2	EBP2	Ribosome biogenesis	4.55732	-0.667425	0.0687128
AT1G52980	Nuclear/nucleolar GTPase 2 (GNL2-like)	NUG2	Ribosome biogenesis	7.16	-0.66	0.11
AT3G11770	RISC-interacting clearing 3′→5′ exoribonuclease 1	RICE1	RNAi	2.3693	-0.931911	-0.0649554
AT5G67240	sRNA-degrading nuclease 3	SDN3	RNAi	2.38363	-0.973033	0
AT1G04510	MOS4-associated complex 3A	MAC3A	RNAi	2.77045	-0.678072	0.351763
AT4G21660	Proline-rich spliceosome-associated protein	PSP	Splicing	3.72172	-0.722993	0.291463
AT3G15010	UBP1-associated protein 2C (hnRNPA1-like)	UBA2C	Splicing	6.04184	-1.02915	0.742504
AT3G25150	Rasputin/G3BP-like2	NTF2L	Stress granules	3.43525	-0.972519	-0.307182
AT5G60980	Rasputin/G3BP-like1	NTF2	Stress granules	7.14911	-0.668794	0.272578
AT1G61040	PAF1 complex subunit Vernalization independence 5	VIP5	Transcription	3.12754	-0.584963	0.296393
AT5G46550	Global transcription factor group E12	GTE12	Transcription factor (bromodomain)	2.90373	-0.869692	0.224966
AT5G11260	Elongated hypocotyl 5	HY5	Transcription factor (bZIP)	3.17885	-0.876852	0.178803
AT5G47140	GATA transcription factor 27	GATA27	Transcription factor (GATA)	3.20695	-0.767023	0.0061002
AT4G14720	Peapod2	PPD2	Transcription factor (TIFY)	7.05194	-1.15612	0.408085
AT1G57720	Eukaryotic elongation factor 1Bγ2	eEF1Bγ2	Translation	2.95	-0.56	0.1
AT1G49760	PolyA binding protein PABP8 (TSS1)	PABP8	Translation	3.4	-1.05	0.06
AT3G23000	Eukaryotic elongation factor 1Bβ1	eEF1Bβ1	Translation	4.34	-1.02	-0.34
AT1G79880	Lupus autoantigen 2	LA2	Translation	4.37	-0.77	0.21
AT1G75810	-	-	unknown	2.39959	-0.982859	-0.261852
AT4G31510	-	-	unknown	2.40359	-0.770518	0.122857
AT5G24610	Vacuolar sorting protein-like		unknown	4.95686	-0.760534	0.762501
AT5G46840	RNA-binding motif protein	-	unknown	8.81576	-0.928917	0.0140752
AT5G13100	-	-	unknown	9.9429	-1.49683	-0.106915
AT5G66440	TIE DYED1-like	TDY1L	unknown	10.8558	-0.940621	0.633015
AT5G27970	MON2-like	MON2L	Vesicle trafficking	2.50543	-0.614109	0.533432
AT5G47520	Rab GTPase A5a	RabA5a	Vesicle trafficking	3.28	-0.65	0.61
AT3G22290	Endoplasmic reticulum-Golgi intermediate 3-like protein	ERGIC3L	Vesicle trafficking	4.1702	-0.893085	0.0408062
AT5G60860	Rab GTPase A1f	RabA1f	Vesicle trafficking	4.44176	-0.613451	0.095325
